# Supplementary material for: Vertebrates show coordinated elevated expression of mitochondrial and nuclear genes after birth
Source: HighWire-hosted journal article supplement (doi:10.1101/gr.279700.124), 2025-03-01
Supplement: Supplemental_Table_S2_REVISED.xlsx [file Supplemental_Table_S2_REVISED.xlsx]

## Sheet: Regulatory Genes
Name	ENS	Description	Table S2. List of analyzed OXPHOS, mito-ribosome and candidate regulatory genes. Shown also is the list of reference genomes used in the current study.
C/EBPB	ENSG00000172216	CCAAT/enhancer binding protein beta(CEBPB)
DAZAP1	ENSG00000071626	DAZ associated protein 1(DAZAP1)
DRG2	ENSG00000108591	developmentally regulated GTP binding protein 2(DRG2)
EEFSEC	ENSG00000132394	eukaryotic elongation factor, selenocysteine-tRNA specific(EEFSEC)
ERAL1	ENSG00000132591	Era like 12S mitochondrial rRNA chaperone 1(ERAL1)
GFM1	ENSG00000168827	G elongation factor mitochondrial 1(GFM1)
GFM2	ENSG00000164347	G elongation factor mitochondrial 2(GFM2)
GRSF1	ENSG00000132463	G-rich RNA sequence binding factor 1(GRSF1)
HNRNPK	ENSG00000165119	heterogeneous nuclear ribonucleoprotein K(HNRNPK)
JUN	ENSG00000177606	Jun proto-oncogene, AP-1 transcription factor subunit(JUN)
JUND	ENSG00000130522	JunD proto-oncogene, AP-1 transcription factor subunit(JUND)
KIAA0391	ENSG00000258790	KIAA0391(KIAA0391)
LOC119358	ENSG00000100890	KIAA0391(KIAA0391)
LRPPRC	ENSG00000138095	leucine rich pentatricopeptide repeat containing(LRPPRC)
LSM3	ENSG00000170860	LSM3 homolog, U6 small nuclear RNA and mRNA degradation associated(LSM3)
LSM4	ENSG00000130520	LSM4 homolog, U6 small nuclear RNA and mRNA degradation associated(LSM4)
MCTS1	ENSG00000232119	MCTS1, re-initiation and release factor(MCTS1)
MEF2D	ENSG00000116604	myocyte enhancer factor 2D(MEF2D)
MTERF1	ENSG00000127989	mitochondrial transcription termination factor 1(MTERF1)
MTERF2	ENSG00000120832	mitochondrial transcription termination factor 2(MTERF2)
MTERF3	ENSG00000156469	mitochondrial transcription termination factor 3(MTERF3)
MTG1	ENSG00000148824	mitochondrial ribosome associated GTPase 1(MTG1)
MTIF2	ENSG00000085760	Mitochondrial Translational initiation factor 2(MTIF2)
MTIF3	ENSG00000122033	Mitochondrial Translational initiation factor 3(MTIF3)
MTO1	ENSG00000135297	mitochondrial tRNA translation optimization 1(MTO1)
MTPAP	ENSG00000107951	Mitochondrial Poly(A) Polymerase
NELFE	ENSG00000204356	Negative Elongation Factor Complex Member E
NFATC1	ENSG00000131196	nuclear factor of activated T-cells 1(NFATC1)
NFXL1	ENSG00000170448	nuclear transcription factor, X-box binding like 1(NFXL1)
NHP2	ENSG00000145912	NHP2 ribonucleoprotein(NHP2)
NOA1	ENSG00000084092	nitric oxide associated 1(NOA1)
POLRMT	ENSG00000099821	RNA polymerase mitochondrial(POLRMT)
PSMA6	ENSG00000100902	proteasome subunit alpha 6(PSMA6)
PTCD1	ENSG00000106246	pentatricopeptide repeat domain 1(PTCD1)
PTCD2	ENSG00000049883	pentatricopeptide repeat domain 2(PTCD2)
PTCD3	ENSG00000132300	pentatricopeptide repeat domain 3(PTCD3)
PTRF	ENSG00000177469	polymerase I and transcript release factor(PTRF)
SECISBP2	ENSG00000187742	SECIS binding protein 2(SECISBP2)
SLIRP	ENSG00000119705	SRA stem-loop interacting RNA binding protein(SLIRP)
SPRYD4	ENSG00000176422	SPRY domain containing 4(SPRYD4)
SSBP1	ENSG00000106028	single stranded DNA binding protein 1(SSBP1)
TBRG4	ENSG00000136270	transforming growth factor beta regulator 4(TBRG4)
TDRKH	ENSG00000182134	tudor and KH domain containing(TDRKH)
TFAM	ENSG00000108064	transcription factor A, mitochondrial(TFAM)
TFB1M	ENSG00000029639	transcription factor B1, mitochondrial(TFB1M)
TFB2M	ENSG00000162851	transcription factor B2, mitochondrial(TFB2M)
TSHZ3	ENSG00000121297	teashirt zinc finger homeobox 3(TSHZ3)
TUFM	ENSG00000178952	Tu Translation Elongation Factor, Mitochondrial
ATF2	ENSG00000115966	Activating Transcription Factor 2
NRF1	ENSG00000106459	Biogenesis related gene
NRF2	ENSG00000116044	Biogenesis related gene
PGC1A	ENSG00000109819	Biogenesis related gene
YY1	ENSG00000100811	Biogenesis related gene
GPD2	ENSG00000115159	Biogenesis related gene
YMEL1	ENSG00000136758	Biogenesis related gene
HSP60	ENSG00000144381	Biogenesis related gene
SPG7	ENSG00000197912	Biogenesis related gene
CLK1	ENSG00000013441	Biogenesis related gene
NOS3	ENSG00000164867	Biogenesis related gene
PGC1B	ENSG00000155846	Biogenesis related gene
SIRT1	ENSG00000096717	Biogenesis related gene
TORC1	ENSG00000105662	Biogenesis related gene
TORC2	ENSG00000160741	Biogenesis related gene
TORC3	ENSG00000140577	Biogenesis related gene
AMPK	ENSG00000162409	Biogenesis related gene
CAMK4	ENSG00000152495	Biogenesis related gene
RIP140	ENSG00000180530	Biogenesis related gene
Sin3A	ENSG00000169375	Biogenesis related gene
SSBP1	ENSG00000262771	MitochondrialReplication
POLG	ENSG00000140521	MitochondrialReplication
POLG2	ENSG00000256525	MitochondrialReplication
TWNK	ENSG00000107815	MitochondrialReplication

## Sheet: OXPHOS
gene	Ensembl ID	Complex	Protein type
NDUFS1	ENSG00000023228	I	Structural
NDUFS2	ENSG00000158864	I	Structural
NDUFS3	ENSG00000213619	I	Structural
NDUFS7	ENSG00000115286	I	Structural
NDUFS8	ENSG00000110717	I	Structural
NDUFV1	ENSG00000167792	I	Structural
NDUFV2	ENSG00000178127	I	Structural
NDUFAB1	ENSG00000004779	I	Structural
NDUFA1	ENSG00000125356	I	Structural
NDUFA2	ENSG00000131495	I	Structural
NDUFA3	ENSG00000170906	I	Structural
NDUFA5	ENSG00000128609	I	Structural
NDUFA6	ENSG00000184983	I	Structural
NDUFA7	ENSG00000267855	I	Structural
NDUFA8	ENSG00000119421	I	Structural
NDUFA9	ENSG00000139180	I	Structural
NDUFA10	ENSG00000130414	I	Structural
NDUFA11	ENSG00000174886	I	Structural
NDUFA12	ENSG00000184752	I	Structural
NDUFA13	ENSG00000186010	I	Structural
NDUFB1	ENSG00000183648	I	Structural
NDUFB2	ENSG00000090266	I	Structural
NDUFB3	ENSG00000119013	I	Structural
NDUFB4	ENSG00000065518	I	Structural
NDUFB5	ENSG00000136521	I	Structural
NDUFB6	ENSG00000165264	I	Structural
NDUFB7	ENSG00000099795	I	Structural
NDUFB8	ENSG00000166136	I	Structural
NDUFB9	ENSG00000147684	I	Structural
NDUFB10	ENSG00000140990	I	Structural
NDUFB11	ENSG00000147123	I	Structural
NDUFC1	ENSG00000109390	I	Structural
NDUFC2	ENSG00000151366	I	Structural
NDUFS4	ENSG00000164258	I	Structural
NDUFS5	ENSG00000168653	I	Structural
NDUFS6	ENSG00000145494	I	Structural
NDUFV3	ENSG00000160194	I	Structural
SDHA	ENSG00000073578	II	Structural
SDHB	ENSG00000117118	II	Structural
SDHC	ENSG00000143252	II	Structural
SDHD	ENSG00000204370	II	Structural
CYC1	ENSG00000179091	III	Structural
UQCRB	ENSG00000156467	III	Structural
UQCRC1	ENSG00000010256	III	Structural
UQCRC2	ENSG00000140740	III	Structural
UQCRFS1	ENSG00000169021	III	Structural
UQCRH	ENSG00000173660	III	Structural
UQCRQ	ENSG00000164405	III	Structural
UQCR10	ENSG00000184076	III	Structural
UQCR11	ENSG00000127540	III	Structural
NDUFA4	ENSG00000189043	IV	Structural
COX4I1	ENSG00000131143	IV	Structural
COX4I2	ENSG00000131055	IV	Structural
COX5A	ENSG00000178741	IV	Structural
COX5B	ENSG00000135940	IV	Structural
COX6A1	ENSG00000111775	IV	Structural
COX6A2	ENSG00000156885	IV	Structural
COX6B1	ENSG00000126267	IV	Structural
COX6B2	ENSG00000160471	IV	Structural
COX6C	ENSG00000164919	IV	Structural
COX7A1	ENSG00000161281	IV	Structural
COX7A2	ENSG00000112695	IV	Structural
COX7A2L	ENSG00000115944	IV	Structural
COX7B	ENSG00000131174	IV	Structural
COX7B2	ENSG00000170516	IV	Structural
COX7C	ENSG00000127184	IV	Structural
COX8A	ENSG00000176340	IV	Structural
COX8C	ENSG00000187581	IV	Structural
ATP5A1	ENSG00000152234	V	Structural
ATP5B	ENSG00000110955	V	Structural
ATP5C1	ENSG00000165629	V	Structural
ATP5D	ENSG00000099624	V	Structural
ATP5E	ENSG00000124172	V	Structural
ATP5F1	ENSG00000116459	V	Structural
ATP5G1	ENSG00000159199	V	Structural
ATP5G2	ENSG00000135390	V	Structural
ATP5G3	ENSG00000154518	V	Structural
ATP5H	ENSG00000167863	V	Structural
ATP5I	ENSG00000169020	V	Structural
ATP5J	ENSG00000154723	V	Structural
ATP5J2	ENSG0000024146	V	Structural
ATP5L	ENSG00000167283	V	Structural
ATP5L2	ENSG00000249222	V	Structural
ATP5O	ENSG00000241837	V	Structural
ATPIF1	ENSG00000130770	V	Structural
C14orf2	ENSG00000156411	V	Structural
USMG5	ENSG00000173915	V	Structural
FOXRED1	ENSG00000110074	I	Assembly
NDUFAF1	ENSG00000137806	I	Assembly
NDUFAF2	ENSG00000164182	I	Assembly
NDUFAF3	ENSG00000178057	I	Assembly
NDUFAF4	ENSG00000123545	I	Assembly
NDUFAF5	ENSG00000101247	I	Assembly
NDUFAF6	ENSG00000156170	I	Assembly
NDUFAF7	ENSG00000003509	I	Assembly
NUBPL	ENSG00000151413	I	Assembly
TIMMDC1	ENSG00000113845	I	Assembly
TMEM126B	ENSG00000171204	I	Assembly
ACAD9	ENSG00000177646	I	Assembly
ECSIT	ENSG00000130159	I	Assembly
SDHAF1	ENSG00000205138	II	Assembly
SDHAF2	ENSG00000167985	II	Assembly
SDHAF3	ENSG00000196636	II	Assembly
SDHAF4	ENSG00000154079	II	Assembly
BCS1L	ENSG00000074582	III	Assembly
UQCC1	ENSG00000101019	III	Assembly
UQCC2	ENSG00000137288	III	Assembly
UQCC3	ENSG00000204922	III	Assembly
COA1	ENSG00000106603	IV	Assembly
COA3	ENSG00000183978	IV	Assembly
COA4	ENSG00000181924	IV	Assembly
COA5	ENSG00000183513	IV	Assembly
COA6	ENSG00000168275	IV	Assembly
COA7	ENSG00000162377	IV	Assembly
COX10	ENSG00000006695	IV	Assembly
COX11	ENSG00000166260	IV	Assembly
SURF1	ENSG00000148290	IV	Assembly
COX14	ENSG00000178449	IV	Assembly
COX15	ENSG00000014919	IV	Assembly
COX17	ENSG00000138495	IV	Assembly
COX18	ENSG00000163626	IV	Assembly
COX19	ENSG00000240230	IV	Assembly
COX20	ENSG00000203667	IV	Assembly
SCO1	ENSG00000133028	IV	Assembly
SCO2	ENSG00000130489	IV	Assembly
ATPAF1	ENSG00000123472	V	Assembly
ATPAF2	ENSG00000171953	V	Assembly
CYCS	ENSG00000172115	III	Other

## Sheet: Mitochondrial Ribosome
gene	Subunit Name	Ensembl ID	Subunit	Other Names
MRPS2	S2	ENSG00000122140	Small
MRPS5	S5	ENSG00000144029	Small
MRPS6	S6	ENSG00000243927	Small
MRPS7	S7	ENSG00000125445	Small
MRPS9	S9	ENSG00000135972	Small
MRPS10	S10	ENSG00000048544	Small
MRPS11	S11	ENSG00000181991	Small
MRPS12	S12	ENSG00000128626	Small
MRPS14	S14	ENSG00000120333	Small
MRPS15	S15	ENSG00000116898	Small
MRPS16	S16	ENSG00000182180	Small
MRPS17	S17	ENSG00000239789	Small
MRPS18A	S18A	ENSG00000096080	Small
MRPS18B	S18B	ENSG00000229861	Small
MRPS18C	S18C	ENSG00000163319	Small
MRPS21	S21	ENSG00000266472	Small
MRPS22	S22	ENSG00000175110	Small
MRPS23	S23	ENSG00000181610	Small
MRPS24	S24	ENSG00000062582	Small
MRPS25	S25	ENSG00000131368	Small
MRPS26	S26	ENSG00000125901	Small
MRPS27	S27	ENSG00000113048	Small
MRPS28	S28	ENSG00000147586	Small
DAP3	S29	ENSG00000132676	Small	MRPS29
MRPS30	S30	ENSG00000112996	Small
MRPS31	S31	ENSG00000102738	Small
MRPS33	S33	ENSG00000090263	Small
MRPS34	S34	ENSG00000074071	Small
MRPS35	S35	ENSG00000061794	Small
MRPS36	S36	ENSG00000278461	Small
MRPL1	L1	ENSG00000169288	Large
MRPL2	L2	ENSG00000112651	Large
MRPL3	L3	ENSG00000114686	Large
MRPL4	L4	ENSG00000105364	Large
MRPL9	L9	ENSG00000143436	Large
MRPL10	L10	ENSG00000159111	Large
MRPL11	L11	ENSG00000174547	Large
MRPL12	L12	ENSG00000262814	Large
MRPL13	L13	ENSG00000172172	Large
MRPL14	L14	ENSG00000180992	Large
MRPL15	L15	ENSG00000137547	Large
MRPL16	L16	ENSG00000166902	Large
MRPL17	L17	ENSG00000158042	Large
MRPL18	L18	ENSG00000112110	Large
MRPL19	L19	ENSG00000115364	Large
MRPL20	L20	ENSG00000242485	Large
MRPL21	L21	ENSG00000197345	Large
MRPL22	L22	ENSG00000082515	Large
MRPL23	L23	ENSG00000214026	Large
MRPL24	L24	ENSG00000143314	Large
MRPL27	L27	ENSG00000108826	Large
MRPL28	L28	ENSG00000086504	Large
MRPL30	L30	ENSG00000185414	Large
MRPL32	L32	ENSG00000106591	Large
MRPL33	L33	ENSG00000243147	Large
MRPL34	L34	ENSG00000130312	Large
MRPL35	L35	ENSG00000132313	Large
MRPL36	L36	ENSG00000171421	Large
MRPL37	L37	ENSG00000116221	Large
MRPL38	L38	ENSG00000204316	Large
MRPL39	L39	ENSG00000154719	Large
MRPL40	L40	ENSG00000185608	Large
MRPL41	L41	ENSG00000182154	Large
MRPL42	L42	ENSG00000198015	Large
MRPL43	L43	ENSG00000055950	Large
MRPL44	L44	ENSG00000135900	Large
MRPL45	L45	ENSG00000278845	Large
MRPL45	L45	ENSG00000277936	Large
MRPL46	L46	ENSG00000259494	Large
MRPL47	L47	ENSG00000136522	Large
MRPL48	L48	ENSG00000175581	Large
MRPL49	L49	ENSG00000149792	Large
MRPL50	L50	ENSG00000136897	Large
MRPL51	L51	ENSG00000111639	Large
MRPL52	L52	ENSG00000172590	Large
MRPL53	L53	ENSG00000204822	Large
MRPL54	L54	ENSG00000183617	Large
MRPL55	L55	ENSG00000162910	Large
LACTB	L56	ENSG00000103642	Large	MRPL56

## Sheet: Genomes
Organism	Reference Genome
human	GRCh38
mouse	GRCm39
rhesus	Mmul_10
rat	mRatBN7.2
rabbit	OryCun2.0
chicken	GRCg6a
