# Supplementary material for: Vertebrates show coordinated elevated expression of mitochondrial and nuclear genes after birth
Source: HighWire-hosted journal article supplement (doi:10.1101/gr.279700.124), 2025-03-01
Supplement: Supplemental_TableS1_REVISED.xlsx [file Supplemental_TableS1_REVISED.xlsx]

## Sheet: level of coordination
	OXPHOS - level of coordination	Mt-Ribosome - level of ccordination	Table S1. Differential expression of mitochondrial genes in a comparison between prenatal and postnatal samples, divided according to pathways and organisms. Also shown calculated level of mito-nuclear gene expression coordination (see Methods).
Heart human ( 19wpc - newborn )	0.867925	0.897436
Heart rhesus ( e130 - P0 )	0.863158	0.777778
Heart mouse ( e18.5 - P0 )	0.884298	0.72
Heart rat ( e20 - P0 )	0.723404	0.371429
Heart rabbit ( P0 - P14 )	0.830769	0.744681
Heart chicken ( e17 - P0 )	0.657143	0.227273
Forebrain/Cerebrum human ( 20wpc - newborn )	0.719626	0.371795
Forebrain/Cerebrum rhesus ( e130 - P0 )	0.652632	0.380952
Forebrain/Cerebrum mouse ( P0 - P3 )	0.371901	-0.0533333
Forebrain/Cerebrum rat ( e20 - P0 )	0.0631579	-0.309859
Forebrain/Cerebrum rabbit ( P0 - P14 )	0.590909	-0.0851064
Forebrain/Cerebrum chicken ( e14 - e17 )	0.352381	0
Hindbrain/Cerebellum human ( 16wpc - newborn )	0.616822	0.192308
Hindbrain/Cerebellum rhesus ( e130 - P0 )	0.414894	0.174603
Hindbrain/Cerebellum mouse ( P0 - P3 )	0.691667	0.266667
Hindbrain/Cerebellum rat ( e20 - P0 )	0.189474	-0.0140845
Hindbrain/Cerebellum rabbit ( P0 - P14 )	0.515152	0.0425532
Hindbrain/Cerebellum chicken ( P0 - P7 )	-0.190476	-0.5
Kidney human ( 20wpc - newborn )	0.783019	0.641026
Kidney rhesus ( e130 - P0 )	0.884211	0.873016
Kidney mouse ( e18.5 - P0 )	0.842975	0.266667
Kidney rat ( P7 - P14 )	0	-0.0285714
Kidney rabbit ( P14 - P84 )	0.787879	0.659574
Kidney chicken ( P0 - P7 )	0.161905	0.227273
Liver human ( 20wpc - newborn )	0.233645	-0.0897436
Liver rhesus ( P3285 - P5475 )	0	0
Liver mouse ( P0 - P3 )	0.672269	0.28
Liver rat ( e20 - P0 )	0.0319149	-0.169014
Liver rabbit ( P0 - P14 )	0.265625	-0.212766
Liver chicken ( P0 - P7 )	-0.590476	-0.515152
Liver pig ( e80 - P0 )	0.8	0.780822
Average+sd OXPHOS
	Average	SD
Heart	0.804449	0.0844707
Forebrain/Cerebrum	0.458434	0.223033
Hindbrain/Cerebellum	0.372922	0.29837
Kidney	0.576665	0.355262
Liver	0.201854	0.427878
Average+sd Mt-Riosomal genes
	0.623099	0.239226
	0.0507414	0.249669
	0.0270077	0.25371
	0.439831	0.308486
	0.0105924	0.384442

## Sheet: Pathways
baseMean	log2FoldChange	lfcSE	stat	pvalue	padj	gene	p_val_adj_BH	group	pathway	dataset	comparison	organism
1.02566	-2.33353	1.43035	-1.63144	0.102798	0.160727	ND6	0.102798	prenatal	mtDNA	Heart	prenatal vs postnatal	human
785.937	3.1347	0.381364	8.21969	2.04027116111986e-16	3.47226842973853e-15	COX2	1.53020337083989e-15	postnatal	mtDNA	Heart	prenatal vs postnatal	human
1608.79	3.55013	0.360356	9.85174	6.73700987379855e-23	2.26684096860497e-21	CYTB	1.01055148106978e-21	postnatal	mtDNA	Heart	prenatal vs postnatal	human
642.583	3.63399	0.457144	7.94934	1.8750338875834e-15	2.89655497809102e-14	ND2	9.37516943791701e-15	postnatal	mtDNA	Heart	prenatal vs postnatal	human
415.265	1.55465	0.485332	3.20327	0.00135878	0.0036277	ND5	0.00145584	postnatal	mtDNA	Heart	prenatal vs postnatal	human
934.37	2.04213	0.409357	4.98864	6.08069838780146e-07	3.03713371599972e-06	COX1	9.12104758170219e-07	postnatal	mtDNA	Heart	prenatal vs postnatal	human
573.779	3.30828	0.443003	7.46785	8.15177935930094e-14	1.0354952387869e-12	ND3	2.44553380779028e-13	postnatal	mtDNA	Heart	prenatal vs postnatal	human
2091.23	2.35772	0.433039	5.44458	5.19263232332027e-08	3.04162894916614e-07	ND4	9.7361856062255e-08	postnatal	mtDNA	Heart	prenatal vs postnatal	human
732.156	2.97061	0.40862	7.26984	3.5991494375644e-13	4.2062176392075e-12	ND1	8.997873593911e-13	postnatal	mtDNA	Heart	prenatal vs postnatal	human
758.667	2.66739	0.399676	6.67387	2.49148526191118e-11	2.28792745561684e-10	ATP6	5.33889698980968e-11	postnatal	mtDNA	Heart	prenatal vs postnatal	human
1370.78	3.02838	0.382953	7.90797	2.61615892712748e-15	3.96594175487721e-14	COX3	9.81059597672803e-15	postnatal	mtDNA	Heart	prenatal vs postnatal	human
1444.91	2.2979	0.481075	4.7766	1.78283101590139e-06	8.26912169020414e-06	16S	2.43113320350189e-06	postnatal	mtDNA	Heart	prenatal vs postnatal	human
144.179	2.24982	0.433538	5.18943	2.10936579233569e-07	1.13042344700916e-06	12S	3.51560965389282e-07	postnatal	mtDNA	Heart	prenatal vs postnatal	human
123.404	2.24052	0.574431	3.90042	9.60276202874595e-05	0.000325012	ND4L	0.000110801	postnatal	mtDNA	Heart	prenatal vs postnatal	human
146.344	2.86737	0.614985	4.66251	3.12375493828759e-06	1.39362258523772e-05	ATP8	3.90469367285949e-06	postnatal	mtDNA	Heart	prenatal vs postnatal	human
1305.97	1.2713	0.135662	9.37107	7.18010559280295e-21	1.94961244982402e-19	MRPS10	3.59005279640147e-20	postnatal	Small Subunit of Mitochondrial Ribosome	Heart	prenatal vs postnatal	human
2205.52	0.84601	0.168677	5.01556	5.28787512849344e-07	2.66753054614611e-06	MRPS35	7.21073881158196e-07	postnatal	Small Subunit of Mitochondrial Ribosome	Heart	prenatal vs postnatal	human
10.9609	1.22828	0.450904	2.72403	0.00644911	0.0146065	MRPS24	0.00716568	postnatal	Small Subunit of Mitochondrial Ribosome	Heart	prenatal vs postnatal	human
1826.98	1.371	0.215078	6.37444	1.83631254303557e-10	1.51104411405295e-09	MRPS34	3.67262508607115e-10	postnatal	Small Subunit of Mitochondrial Ribosome	Heart	prenatal vs postnatal	human
1505.63	1.73435	0.192007	9.03274	1.6743109820303e-19	3.89450330182545e-18	MRPS33	7.17561849441557e-19	postnatal	Small Subunit of Mitochondrial Ribosome	Heart	prenatal vs postnatal	human
1262.61	1.70282	0.168219	10.1226	4.38385642072888e-24	1.66102938050167e-22	MRPS18A	4.38385642072888e-23	postnatal	Small Subunit of Mitochondrial Ribosome	Heart	prenatal vs postnatal	human
1196.49	0.381062	0.136364	2.79445	0.00519874	0.0120648	MRPS31	0.00599854	postnatal	Small Subunit of Mitochondrial Ribosome	Heart	prenatal vs postnatal	human
2013.61	0.396479	0.174581	2.27104	0.0231448	0.045081	MRPS30	0.024798	postnatal	Small Subunit of Mitochondrial Ribosome	Heart	prenatal vs postnatal	human
3013.36	0.833727	0.162444	5.13241	2.86062038547041e-07	1.50347431109968e-06	MRPS27	4.29093057820562e-07	postnatal	Small Subunit of Mitochondrial Ribosome	Heart	prenatal vs postnatal	human
3068.21	1.72993	0.148574	11.6436	2.47458238155489e-31	1.76879135797249e-29	MRPS15	7.42374714466467e-30	postnatal	Small Subunit of Mitochondrial Ribosome	Heart	prenatal vs postnatal	human
981.673	0.521377	0.146856	3.55025	0.00038486	0.00115166	MRPS14	0.000481075	postnatal	Small Subunit of Mitochondrial Ribosome	Heart	prenatal vs postnatal	human
1796.83	1.20324	0.171058	7.03412	2.00524360111089e-12	2.11117346809632e-11	MRPS2	4.62748523333281e-12	postnatal	Small Subunit of Mitochondrial Ribosome	Heart	prenatal vs postnatal	human
3213.45	1.64447	0.172821	9.51548	1.80881580179653e-21	5.22816956394675e-20	MRPS7	1.08528948107792e-20	postnatal	Small Subunit of Mitochondrial Ribosome	Heart	prenatal vs postnatal	human
1802.91	1.18739	0.234113	5.07184	3.93978171250681e-07	2.02793707572338e-06	MRPS26	5.62825958929544e-07	postnatal	Small Subunit of Mitochondrial Ribosome	Heart	prenatal vs postnatal	human
112.059	2.04488	0.268944	7.60335	2.8856573225334e-14	3.86415084602738e-13	MRPS12	7.86997451600018e-14	postnatal	Small Subunit of Mitochondrial Ribosome	Heart	prenatal vs postnatal	human
5319.91	0.201143	0.25459	0.790066	0.429489	0.522336	MRPS25	0.429489	postnatal	Small Subunit of Mitochondrial Ribosome	Heart	prenatal vs postnatal	human
3789.62	0.961479	0.152828	6.29124	3.14946548546037e-10	2.51491285307882e-09	DAP3	5.55788026845948e-10	postnatal	Small Subunit of Mitochondrial Ribosome	Heart	prenatal vs postnatal	human
1136.94	1.40792	0.214301	6.5698	5.03821951721101e-11	4.46085676503781e-10	MRPS36	1.07961846797379e-10	postnatal	Small Subunit of Mitochondrial Ribosome	Heart	prenatal vs postnatal	human
2248.48	1.44468	0.174496	8.27916	1.240511766241e-16	2.15133211028037e-15	MRPS9	4.13503922080333e-16	postnatal	Small Subunit of Mitochondrial Ribosome	Heart	prenatal vs postnatal	human
3347.79	0.506229	0.157776	3.20853	0.00133416	0.00356987	MRPS5	0.00160099	postnatal	Small Subunit of Mitochondrial Ribosome	Heart	prenatal vs postnatal	human
175.65	1.97032	0.278088	7.08526	1.38787977791714e-12	1.48845322329987e-11	MRPS28	3.46969944479286e-12	postnatal	Small Subunit of Mitochondrial Ribosome	Heart	prenatal vs postnatal	human
816.658	1.12359	0.188307	5.96677	2.4199465633431e-09	1.7103240716391e-08	MRPS18C	4.03324427223851e-09	postnatal	Small Subunit of Mitochondrial Ribosome	Heart	prenatal vs postnatal	human
1772.37	1.21069	0.150612	8.03846	9.09760681820009e-16	1.44855152029463e-14	MRPS22	2.72928204546003e-15	postnatal	Small Subunit of Mitochondrial Ribosome	Heart	prenatal vs postnatal	human
2010.04	1.42505	0.166226	8.57301	1.00813962912476e-17	1.94473149317744e-16	MRPS23	3.78052360921787e-17	postnatal	Small Subunit of Mitochondrial Ribosome	Heart	prenatal vs postnatal	human
1261.99	1.59421	0.151103	10.5505	5.0527848043573e-26	2.31998263404232e-24	MRPS11	7.57917720653595e-25	postnatal	Small Subunit of Mitochondrial Ribosome	Heart	prenatal vs postnatal	human
2635.24	0.547616	0.127567	4.29278	1.76451430462591e-05	6.87986286516901e-05	MRPS16	2.30154039733814e-05	postnatal	Small Subunit of Mitochondrial Ribosome	Heart	prenatal vs postnatal	human
1068.13	1.93923	0.307092	6.31482	2.70476622564781e-10	2.1802179935906e-09	MRPS18B	5.07143667308964e-10	postnatal	Small Subunit of Mitochondrial Ribosome	Heart	prenatal vs postnatal	human
318.863	1.49717	0.148643	10.0723	7.32777858015397e-24	2.72570689323955e-22	MRPS17	5.49583393511548e-23	postnatal	Small Subunit of Mitochondrial Ribosome	Heart	prenatal vs postnatal	human
1843.33	-0.42373	0.208785	-2.0295	0.0424073	0.0760474	MRPS6	0.0438697	prenatal	Small Subunit of Mitochondrial Ribosome	Heart	prenatal vs postnatal	human
2689.13	0.822362	0.138487	5.93818	2.88198339780726e-09	2.01746466177365e-08	MRPS21	4.55050010180094e-09	postnatal	Small Subunit of Mitochondrial Ribosome	Heart	prenatal vs postnatal	human
1799.12	1.01792	0.166902	6.09894	1.06772485129126e-09	7.93651465489035e-09	MRPL43	2.13544970258251e-09	postnatal	Large Subunit of Mitochondrial Ribosome	Heart	prenatal vs postnatal	human
1407.48	0.923907	0.160507	5.75619	8.60358264169376e-09	5.62797304291058e-08	MRPL22	1.58835371846654e-08	postnatal	Large Subunit of Mitochondrial Ribosome	Heart	prenatal vs postnatal	human
2317.94	1.09574	0.166521	6.58021	4.69798474304189e-11	4.17919954588728e-10	MRPL28	1.02501485302732e-10	postnatal	Large Subunit of Mitochondrial Ribosome	Heart	prenatal vs postnatal	human
806.36	0.911354	0.168219	5.41765	6.03867643993529e-08	3.49923040768994e-07	LACTB	9.99505065920324e-08	postnatal	Large Subunit of Mitochondrial Ribosome	Heart	prenatal vs postnatal	human
1779.78	1.68024	0.18391	9.13621	6.46804122391534e-20	1.57950402815225e-18	MRPL4	3.10465978747937e-19	postnatal	Large Subunit of Mitochondrial Ribosome	Heart	prenatal vs postnatal	human
1848.75	0.687726	0.163588	4.20402	2.62221077023376e-05	9.90142893209198e-05	MRPL32	3.06990529198098e-05	postnatal	Large Subunit of Mitochondrial Ribosome	Heart	prenatal vs postnatal	human
1816.52	0.765953	0.151873	5.04337	4.57401581393329e-07	2.33215724370723e-06	MRPL27	6.98043252009211e-07	postnatal	Large Subunit of Mitochondrial Ribosome	Heart	prenatal vs postnatal	human
3449.57	1.45562	0.136867	10.6353	2.04143864827802e-26	9.85217662974614e-25	MRPL51	1.63315091862242e-25	postnatal	Large Subunit of Mitochondrial Ribosome	Heart	prenatal vs postnatal	human
1727.09	1.0743	0.162686	6.60351	4.01541254607566e-11	3.60107207887633e-10	MRPL18	9.1780858196015e-11	postnatal	Large Subunit of Mitochondrial Ribosome	Heart	prenatal vs postnatal	human
1754.47	1.32434	0.200155	6.61656	3.67642022897992e-11	3.31843978825365e-10	MRPL2	8.8234085495518e-11	postnatal	Large Subunit of Mitochondrial Ribosome	Heart	prenatal vs postnatal	human
2225.89	0.602068	0.132929	4.52924	5.91971869965365e-06	2.51985836873877e-05	MRPL3	7.35869648737592e-06	postnatal	Large Subunit of Mitochondrial Ribosome	Heart	prenatal vs postnatal	human
1174.52	0.621898	0.195092	3.18771	0.00143402	0.00380779	MRPL19	0.00156439	postnatal	Large Subunit of Mitochondrial Ribosome	Heart	prenatal vs postnatal	human
2576.21	1.22528	0.158506	7.7302	1.07377921932023e-14	1.51699994729498e-13	MRPL37	3.43609350182472e-14	postnatal	Large Subunit of Mitochondrial Ribosome	Heart	prenatal vs postnatal	human
2558.09	2.16394	0.234507	9.2276	2.76775121498698e-20	7.04511226013095e-19	MRPL34	1.47613398132639e-19	postnatal	Large Subunit of Mitochondrial Ribosome	Heart	prenatal vs postnatal	human
2539.69	1.44741	0.164107	8.81987	1.14592094935563e-18	2.45195561064793e-17	MRPL35	4.23109273608233e-18	postnatal	Large Subunit of Mitochondrial Ribosome	Heart	prenatal vs postnatal	human
1330.09	1.21665	0.183038	6.647	2.99123946320999e-11	2.73073213957593e-10	MRPL44	7.55681548600418e-11	postnatal	Large Subunit of Mitochondrial Ribosome	Heart	prenatal vs postnatal	human
1440.97	0.654444	0.159598	4.10058	4.12111629152014e-05	0.00014971	MRPL47	4.70984719030873e-05	postnatal	Large Subunit of Mitochondrial Ribosome	Heart	prenatal vs postnatal	human
1125.2	0.589883	0.160329	3.67921	0.000233954	0.000731024	MRPL50	0.000261158	postnatal	Large Subunit of Mitochondrial Ribosome	Heart	prenatal vs postnatal	human
3370.96	1.01614	0.149554	6.79448	1.08702679888628e-11	1.0465452402674e-10	MRPL15	3.26108039665884e-11	postnatal	Large Subunit of Mitochondrial Ribosome	Heart	prenatal vs postnatal	human
2179.38	1.98493	0.158371	12.5334	4.9005491651706e-36	4.57967575163487e-34	MRPL24	2.35226359928189e-34	postnatal	Large Subunit of Mitochondrial Ribosome	Heart	prenatal vs postnatal	human
1325.37	0.555794	0.119173	4.66375	3.10499579860959e-06	1.38548715852586e-05	MRPL9	4.02810265765568e-06	postnatal	Large Subunit of Mitochondrial Ribosome	Heart	prenatal vs postnatal	human
1478.7	1.03154	0.204813	5.03651	4.7410828825965e-07	2.40944310138412e-06	MRPL49	6.98043252009211e-07	postnatal	Large Subunit of Mitochondrial Ribosome	Heart	prenatal vs postnatal	human
1381.28	0.930346	0.14701	6.32845	2.47629556971655e-10	2.00460939492787e-09	MRPL39	5.16792118897367e-10	postnatal	Large Subunit of Mitochondrial Ribosome	Heart	prenatal vs postnatal	human
1548.87	0.734065	0.150211	4.88689	1.0244281338214e-06	4.93408320072383e-06	MRPL17	1.40493001209792e-06	postnatal	Large Subunit of Mitochondrial Ribosome	Heart	prenatal vs postnatal	human
2101.04	0.973496	0.145572	6.6874	2.27166340312302e-11	2.09918525584887e-10	MRPL10	6.05776907499473e-11	postnatal	Large Subunit of Mitochondrial Ribosome	Heart	prenatal vs postnatal	human
1010.16	1.31962	0.221054	5.96965	2.37757109704781e-09	1.68262303461663e-08	MRPL55	4.5649365063318e-09	postnatal	Large Subunit of Mitochondrial Ribosome	Heart	prenatal vs postnatal	human
2553.78	1.55253	0.165476	9.38219	6.46142347688312e-21	1.76170378034152e-19	MRPL16	3.87685408612987e-20	postnatal	Large Subunit of Mitochondrial Ribosome	Heart	prenatal vs postnatal	human
1066.99	0.843594	0.17246	4.89153	1.00053334411589e-06	4.8260268743084e-06	MRPL1	1.40493001209792e-06	postnatal	Large Subunit of Mitochondrial Ribosome	Heart	prenatal vs postnatal	human
739.468	1.47326	0.164374	8.96288	3.16317447293286e-19	7.11970002431109e-18	MRPL36	1.38029431546161e-18	postnatal	Large Subunit of Mitochondrial Ribosome	Heart	prenatal vs postnatal	human
1084.41	0.98892	0.179651	5.50467	3.69859514691215e-08	2.21154749831304e-07	MRPL13	6.34044882327798e-08	postnatal	Large Subunit of Mitochondrial Ribosome	Heart	prenatal vs postnatal	human
1414.91	1.24268	0.185676	6.69273	2.19038065305748e-11	2.02974762198357e-10	MRPL52	6.05776907499473e-11	postnatal	Large Subunit of Mitochondrial Ribosome	Heart	prenatal vs postnatal	human
1330.15	1.36954	0.155036	8.8337	1.01265605917606e-18	2.18269884246367e-17	MRPL11	4.05062423670423e-18	postnatal	Large Subunit of Mitochondrial Ribosome	Heart	prenatal vs postnatal	human
951.364	0.97763	0.123388	7.92322	2.31442904035506e-15	3.53200835719967e-14	MRPL48	7.93518528121735e-15	postnatal	Large Subunit of Mitochondrial Ribosome	Heart	prenatal vs postnatal	human
1129.99	0.812973	0.168088	4.83659	1.32082969302611e-06	6.26306080682612e-06	MRPL14	1.76110625736815e-06	postnatal	Large Subunit of Mitochondrial Ribosome	Heart	prenatal vs postnatal	human
4996.68	3.01917	0.302619	9.97679	1.92599428411811e-23	6.8006369602232e-22	MRPL41	1.32068179482385e-22	postnatal	Large Subunit of Mitochondrial Ribosome	Heart	prenatal vs postnatal	human
943.246	2.13706	0.186087	11.4842	1.58420141789055e-30	1.0526978617827e-28	MRPL54	3.80208340293732e-29	postnatal	Large Subunit of Mitochondrial Ribosome	Heart	prenatal vs postnatal	human
1127.01	0.34735	0.142234	2.4421	0.0146023	0.0301614	MRPL30	0.0152372	postnatal	Large Subunit of Mitochondrial Ribosome	Heart	prenatal vs postnatal	human
1614.98	1.98669	0.17484	11.3629	6.39758109820004e-30	3.97175650948583e-28	MRPL40	1.02361297571201e-28	postnatal	Large Subunit of Mitochondrial Ribosome	Heart	prenatal vs postnatal	human
1891.64	1.25616	0.220836	5.68821	1.28380491945272e-08	8.21107344734366e-08	MRPL21	2.28231985680483e-08	postnatal	Large Subunit of Mitochondrial Ribosome	Heart	prenatal vs postnatal	human
1883.72	-0.532057	0.117526	-4.52713	5.97894089599293e-06	2.5422473296122e-05	MRPL42	7.35869648737592e-06	prenatal	Large Subunit of Mitochondrial Ribosome	Heart	prenatal vs postnatal	human
168.147	-0.415663	0.29069	-1.42992	0.15274	0.223907	MRPL38	0.15274	prenatal	Large Subunit of Mitochondrial Ribosome	Heart	prenatal vs postnatal	human
45.9895	-1.21625	0.273047	-4.45436	8.41423366214138e-06	3.4879504335839e-05	MRPL53	1.00970803945697e-05	prenatal	Large Subunit of Mitochondrial Ribosome	Heart	prenatal vs postnatal	human
306.812	0.830556	0.262465	3.16444	0.00155379	0.00409147	MRPL23	0.00165738	postnatal	Large Subunit of Mitochondrial Ribosome	Heart	prenatal vs postnatal	human
2410.77	1.8092	0.163234	11.0835	1.5091737565488e-28	8.60196515936341e-27	MRPL20	1.81100850785856e-27	postnatal	Large Subunit of Mitochondrial Ribosome	Heart	prenatal vs postnatal	human
2917.85	2.12597	0.196569	10.8154	2.91114640185523e-27	1.4891893402295e-25	MRPL33	2.79470054578102e-26	postnatal	Large Subunit of Mitochondrial Ribosome	Heart	prenatal vs postnatal	human
510.131	0.914023	0.181563	5.03418	4.79904735756333e-07	2.43609223542183e-06	MRPL46	6.98043252009211e-07	postnatal	Large Subunit of Mitochondrial Ribosome	Heart	prenatal vs postnatal	human
1112.01	1.61292	0.302206	5.33716	9.44162069695115e-08	5.32074456791534e-07	MRPL12	1.51065931151218e-07	postnatal	Large Subunit of Mitochondrial Ribosome	Heart	prenatal vs postnatal	human
324.62	0.543898	0.287455	1.89211	0.0584759	0.09982	MRPL45	0.05972	postnatal	Large Subunit of Mitochondrial Ribosome	Heart	prenatal vs postnatal	human
1305.97	1.2713	0.135662	9.37107	7.18010559280295e-21	1.94961244982402e-19	MRPS10	4.00034454456164e-20	postnatal	Mitochondrial Ribosome	Heart	prenatal vs postnatal	human
1799.12	1.01792	0.166902	6.09894	1.06772485129126e-09	7.93651465489035e-09	MRPL43	2.03128142440776e-09	postnatal	Mitochondrial Ribosome	Heart	prenatal vs postnatal	human
2205.52	0.84601	0.168677	5.01556	5.28787512849344e-07	2.66753054614611e-06	MRPS35	7.49916836404524e-07	postnatal	Mitochondrial Ribosome	Heart	prenatal vs postnatal	human
10.9609	1.22828	0.450904	2.72403	0.00644911	0.0146065	MRPS24	0.00698654	postnatal	Mitochondrial Ribosome	Heart	prenatal vs postnatal	human
1826.98	1.371	0.215078	6.37444	1.83631254303557e-10	1.51104411405295e-09	MRPS34	3.87114536099391e-10	postnatal	Mitochondrial Ribosome	Heart	prenatal vs postnatal	human
1407.48	0.923907	0.160507	5.75619	8.60358264169376e-09	5.62797304291058e-08	MRPL22	1.49128765789358e-08	postnatal	Mitochondrial Ribosome	Heart	prenatal vs postnatal	human
2317.94	1.09574	0.166521	6.58021	4.69798474304189e-11	4.17919954588728e-10	MRPL28	1.04697945702076e-10	postnatal	Mitochondrial Ribosome	Heart	prenatal vs postnatal	human
1505.63	1.73435	0.192007	9.03274	1.6743109820303e-19	3.89450330182545e-18	MRPS33	7.6821327410802e-19	postnatal	Mitochondrial Ribosome	Heart	prenatal vs postnatal	human
1262.61	1.70282	0.168219	10.1226	4.38385642072888e-24	1.66102938050167e-22	MRPS18A	3.79934223129836e-23	postnatal	Mitochondrial Ribosome	Heart	prenatal vs postnatal	human
1196.49	0.381062	0.136364	2.79445	0.00519874	0.0120648	MRPS31	0.00571129	postnatal	Mitochondrial Ribosome	Heart	prenatal vs postnatal	human
806.36	0.911354	0.168219	5.41765	6.03867643993529e-08	3.49923040768994e-07	LACTB	9.81284921489485e-08	postnatal	Mitochondrial Ribosome	Heart	prenatal vs postnatal	human
1779.78	1.68024	0.18391	9.13621	6.46804122391534e-20	1.57950402815225e-18	MRPL4	3.15317009665873e-19	postnatal	Mitochondrial Ribosome	Heart	prenatal vs postnatal	human
1848.75	0.687726	0.163588	4.20402	2.62221077023376e-05	9.90142893209198e-05	MRPL32	3.19581937622239e-05	postnatal	Mitochondrial Ribosome	Heart	prenatal vs postnatal	human
1816.52	0.765953	0.151873	5.04337	4.57401581393329e-07	2.33215724370723e-06	MRPL27	6.86102372089994e-07	postnatal	Mitochondrial Ribosome	Heart	prenatal vs postnatal	human
3449.57	1.45562	0.136867	10.6353	2.04143864827802e-26	9.85217662974614e-25	MRPL51	2.27474592236694e-25	postnatal	Mitochondrial Ribosome	Heart	prenatal vs postnatal	human
1727.09	1.0743	0.162686	6.60351	4.01541254607566e-11	3.60107207887633e-10	MRPL18	9.21182878217356e-11	postnatal	Mitochondrial Ribosome	Heart	prenatal vs postnatal	human
1754.47	1.32434	0.200155	6.61656	3.67642022897992e-11	3.31843978825365e-10	MRPL2	8.68972054122526e-11	postnatal	Mitochondrial Ribosome	Heart	prenatal vs postnatal	human
2013.61	0.396479	0.174581	2.27104	0.0231448	0.045081	MRPS30	0.0243959	postnatal	Mitochondrial Ribosome	Heart	prenatal vs postnatal	human
3013.36	0.833727	0.162444	5.13241	2.86062038547041e-07	1.50347431109968e-06	MRPS27	4.46256780133385e-07	postnatal	Mitochondrial Ribosome	Heart	prenatal vs postnatal	human
2225.89	0.602068	0.132929	4.52924	5.91971869965365e-06	2.51985836873877e-05	MRPL3	7.645203112909e-06	postnatal	Mitochondrial Ribosome	Heart	prenatal vs postnatal	human
1174.52	0.621898	0.195092	3.18771	0.00143402	0.00380779	MRPL19	0.00162107	postnatal	Mitochondrial Ribosome	Heart	prenatal vs postnatal	human
2576.21	1.22528	0.158506	7.7302	1.07377921932023e-14	1.51699994729498e-13	MRPL37	3.3501911642791e-14	postnatal	Mitochondrial Ribosome	Heart	prenatal vs postnatal	human
3068.21	1.72993	0.148574	11.6436	2.47458238155489e-31	1.76879135797249e-29	MRPS15	9.65087128806407e-30	postnatal	Mitochondrial Ribosome	Heart	prenatal vs postnatal	human
981.673	0.521377	0.146856	3.55025	0.00038486	0.00115166	MRPS14	0.000448046	postnatal	Mitochondrial Ribosome	Heart	prenatal vs postnatal	human
1796.83	1.20324	0.171058	7.03412	2.00524360111089e-12	2.11117346809632e-11	MRPS2	5.58603574595175e-12	postnatal	Mitochondrial Ribosome	Heart	prenatal vs postnatal	human
3213.45	1.64447	0.172821	9.51548	1.80881580179653e-21	5.22816956394675e-20	MRPS7	1.17573027116774e-20	postnatal	Mitochondrial Ribosome	Heart	prenatal vs postnatal	human
1802.91	1.18739	0.234113	5.07184	3.93978171250681e-07	2.02793707572338e-06	MRPS26	6.025548501481e-07	postnatal	Mitochondrial Ribosome	Heart	prenatal vs postnatal	human
112.059	2.04488	0.268944	7.60335	2.8856573225334e-14	3.86415084602738e-13	MRPS12	8.6569719676002e-14	postnatal	Mitochondrial Ribosome	Heart	prenatal vs postnatal	human
2558.09	2.16394	0.234507	9.2276	2.76775121498698e-20	7.04511226013095e-19	MRPL34	1.43923063179323e-19	postnatal	Mitochondrial Ribosome	Heart	prenatal vs postnatal	human
5319.91	0.201143	0.25459	0.790066	0.429489	0.522336	MRPS25	0.429489	postnatal	Mitochondrial Ribosome	Heart	prenatal vs postnatal	human
2539.69	1.44741	0.164107	8.81987	1.14592094935563e-18	2.45195561064793e-17	MRPL35	4.46909170248696e-18	postnatal	Mitochondrial Ribosome	Heart	prenatal vs postnatal	human
3789.62	0.961479	0.152828	6.29124	3.14946548546037e-10	2.51491285307882e-09	DAP3	6.14145769664773e-10	postnatal	Mitochondrial Ribosome	Heart	prenatal vs postnatal	human
1136.94	1.40792	0.214301	6.5698	5.03821951721101e-11	4.46085676503781e-10	MRPS36	1.09161422872905e-10	postnatal	Mitochondrial Ribosome	Heart	prenatal vs postnatal	human
1330.09	1.21665	0.183038	6.647	2.99123946320999e-11	2.73073213957593e-10	MRPL44	7.29114619157435e-11	postnatal	Mitochondrial Ribosome	Heart	prenatal vs postnatal	human
2248.48	1.44468	0.174496	8.27916	1.240511766241e-16	2.15133211028037e-15	MRPS9	4.398178080309e-16	postnatal	Mitochondrial Ribosome	Heart	prenatal vs postnatal	human
1440.97	0.654444	0.159598	4.10058	4.12111629152014e-05	0.00014971	MRPL47	4.94533954982417e-05	postnatal	Mitochondrial Ribosome	Heart	prenatal vs postnatal	human
1125.2	0.589883	0.160329	3.67921	0.000233954	0.000731024	MRPL50	0.000276491	postnatal	Mitochondrial Ribosome	Heart	prenatal vs postnatal	human
3370.96	1.01614	0.149554	6.79448	1.08702679888628e-11	1.0465452402674e-10	MRPL15	2.92372725217689e-11	postnatal	Mitochondrial Ribosome	Heart	prenatal vs postnatal	human
2179.38	1.98493	0.158371	12.5334	4.9005491651706e-36	4.57967575163487e-34	MRPL24	3.82242834883307e-34	postnatal	Mitochondrial Ribosome	Heart	prenatal vs postnatal	human
1325.37	0.555794	0.119173	4.66375	3.10499579860959e-06	1.38548715852586e-05	MRPL9	4.10490969985674e-06	postnatal	Mitochondrial Ribosome	Heart	prenatal vs postnatal	human
3347.79	0.506229	0.157776	3.20853	0.00133416	0.00356987	MRPS5	0.00153036	postnatal	Mitochondrial Ribosome	Heart	prenatal vs postnatal	human
175.65	1.97032	0.278088	7.08526	1.38787977791714e-12	1.48845322329987e-11	MRPS28	4.00943046953842e-12	postnatal	Mitochondrial Ribosome	Heart	prenatal vs postnatal	human
1478.7	1.03154	0.204813	5.03651	4.7410828825965e-07	2.40944310138412e-06	MRPL49	6.93195729425814e-07	postnatal	Mitochondrial Ribosome	Heart	prenatal vs postnatal	human
1381.28	0.930346	0.14701	6.32845	2.47629556971655e-10	2.00460939492787e-09	MRPL39	5.08292248520766e-10	postnatal	Mitochondrial Ribosome	Heart	prenatal vs postnatal	human
1548.87	0.734065	0.150211	4.88689	1.0244281338214e-06	4.93408320072383e-06	MRPL17	1.40184902522928e-06	postnatal	Mitochondrial Ribosome	Heart	prenatal vs postnatal	human
2101.04	0.973496	0.145572	6.6874	2.27166340312302e-11	2.09918525584887e-10	MRPL10	5.715798240116e-11	postnatal	Mitochondrial Ribosome	Heart	prenatal vs postnatal	human
1010.16	1.31962	0.221054	5.96965	2.37757109704781e-09	1.68262303461663e-08	MRPL55	4.38967051025028e-09	postnatal	Mitochondrial Ribosome	Heart	prenatal vs postnatal	human
816.658	1.12359	0.188307	5.96677	2.4199465633431e-09	1.7103240716391e-08	MRPS18C	4.38967051025028e-09	postnatal	Mitochondrial Ribosome	Heart	prenatal vs postnatal	human
2553.78	1.55253	0.165476	9.38219	6.46142347688312e-21	1.76170378034152e-19	MRPL16	3.87685408612987e-20	postnatal	Mitochondrial Ribosome	Heart	prenatal vs postnatal	human
1066.99	0.843594	0.17246	4.89153	1.00053334411589e-06	4.8260268743084e-06	MRPL1	1.39360001501856e-06	postnatal	Mitochondrial Ribosome	Heart	prenatal vs postnatal	human
739.468	1.47326	0.164374	8.96288	3.16317447293286e-19	7.11970002431109e-18	MRPL36	1.3707089382709e-18	postnatal	Mitochondrial Ribosome	Heart	prenatal vs postnatal	human
1084.41	0.98892	0.179651	5.50467	3.69859514691215e-08	2.21154749831304e-07	MRPL13	6.13809407359889e-08	postnatal	Mitochondrial Ribosome	Heart	prenatal vs postnatal	human
1414.91	1.24268	0.185676	6.69273	2.19038065305748e-11	2.02974762198357e-10	MRPL52	5.69498969794945e-11	postnatal	Mitochondrial Ribosome	Heart	prenatal vs postnatal	human
1330.15	1.36954	0.155036	8.8337	1.01265605917606e-18	2.18269884246367e-17	MRPL11	4.15721961135434e-18	postnatal	Mitochondrial Ribosome	Heart	prenatal vs postnatal	human
1772.37	1.21069	0.150612	8.03846	9.09760681820009e-16	1.44855152029463e-14	MRPS22	3.08527535573742e-15	postnatal	Mitochondrial Ribosome	Heart	prenatal vs postnatal	human
951.364	0.97763	0.123388	7.92322	2.31442904035506e-15	3.53200835719967e-14	MRPL48	7.52189438115395e-15	postnatal	Mitochondrial Ribosome	Heart	prenatal vs postnatal	human
1129.99	0.812973	0.168088	4.83659	1.32082969302611e-06	6.26306080682612e-06	MRPL14	1.7762882078627e-06	postnatal	Mitochondrial Ribosome	Heart	prenatal vs postnatal	human
2010.04	1.42505	0.166226	8.57301	1.00813962912476e-17	1.94473149317744e-16	MRPS23	3.74451862246341e-17	postnatal	Mitochondrial Ribosome	Heart	prenatal vs postnatal	human
1261.99	1.59421	0.151103	10.5505	5.0527848043573e-26	2.31998263404232e-24	MRPS11	4.92646518424837e-25	postnatal	Mitochondrial Ribosome	Heart	prenatal vs postnatal	human
4996.68	3.01917	0.302619	9.97679	1.92599428411811e-23	6.8006369602232e-22	MRPL41	1.36570503782921e-22	postnatal	Mitochondrial Ribosome	Heart	prenatal vs postnatal	human
2635.24	0.547616	0.127567	4.29278	1.76451430462591e-05	6.87986286516901e-05	MRPS16	2.18463675810827e-05	postnatal	Mitochondrial Ribosome	Heart	prenatal vs postnatal	human
943.246	2.13706	0.186087	11.4842	1.58420141789055e-30	1.0526978617827e-28	MRPL54	4.11892368651543e-29	postnatal	Mitochondrial Ribosome	Heart	prenatal vs postnatal	human
1127.01	0.34735	0.142234	2.4421	0.0146023	0.0301614	MRPL30	0.0156024	postnatal	Mitochondrial Ribosome	Heart	prenatal vs postnatal	human
1614.98	1.98669	0.17484	11.3629	6.39758109820004e-30	3.97175650948583e-28	MRPL40	1.24752831414901e-28	postnatal	Mitochondrial Ribosome	Heart	prenatal vs postnatal	human
1891.64	1.25616	0.220836	5.68821	1.28380491945272e-08	8.21107344734366e-08	MRPL21	2.17688660255026e-08	postnatal	Mitochondrial Ribosome	Heart	prenatal vs postnatal	human
1883.72	-0.532057	0.117526	-4.52713	5.97894089599293e-06	2.5422473296122e-05	MRPL42	7.645203112909e-06	prenatal	Mitochondrial Ribosome	Heart	prenatal vs postnatal	human
168.147	-0.415663	0.29069	-1.42992	0.15274	0.223907	MRPL38	0.154723	prenatal	Mitochondrial Ribosome	Heart	prenatal vs postnatal	human
1068.13	1.93923	0.307092	6.31482	2.70476622564781e-10	2.1802179935906e-09	MRPS18B	5.40953245129562e-10	postnatal	Mitochondrial Ribosome	Heart	prenatal vs postnatal	human
45.9895	-1.21625	0.273047	-4.45436	8.41423366214138e-06	3.4879504335839e-05	MRPL53	1.05856488007585e-05	prenatal	Mitochondrial Ribosome	Heart	prenatal vs postnatal	human
306.812	0.830556	0.262465	3.16444	0.00155379	0.00409147	MRPL23	0.00173137	postnatal	Mitochondrial Ribosome	Heart	prenatal vs postnatal	human
318.863	1.49717	0.148643	10.0723	7.32777858015397e-24	2.72570689323955e-22	MRPS17	5.7156672925201e-23	postnatal	Mitochondrial Ribosome	Heart	prenatal vs postnatal	human
2410.77	1.8092	0.163234	11.0835	1.5091737565488e-28	8.60196515936341e-27	MRPL20	2.35431106021613e-27	postnatal	Mitochondrial Ribosome	Heart	prenatal vs postnatal	human
2917.85	2.12597	0.196569	10.8154	2.91114640185523e-27	1.4891893402295e-25	MRPL33	3.78449032241179e-26	postnatal	Mitochondrial Ribosome	Heart	prenatal vs postnatal	human
1843.33	-0.42373	0.208785	-2.0295	0.0424073	0.0760474	MRPS6	0.0441036	prenatal	Mitochondrial Ribosome	Heart	prenatal vs postnatal	human
510.131	0.914023	0.181563	5.03418	4.79904735756333e-07	2.43609223542183e-06	MRPL46	6.93195729425814e-07	postnatal	Mitochondrial Ribosome	Heart	prenatal vs postnatal	human
1112.01	1.61292	0.302206	5.33716	9.44162069695115e-08	5.32074456791534e-07	MRPL12	1.50295186604528e-07	postnatal	Mitochondrial Ribosome	Heart	prenatal vs postnatal	human
2689.13	0.822362	0.138487	5.93818	2.88198339780726e-09	2.01746466177365e-08	MRPS21	5.10897056884015e-09	postnatal	Mitochondrial Ribosome	Heart	prenatal vs postnatal	human
324.62	0.543898	0.287455	1.89211	0.0584759	0.09982	MRPL45	0.0600147	postnatal	Mitochondrial Ribosome	Heart	prenatal vs postnatal	human
931.516	0.520723	0.112687	4.62099	3.81914337674259e-06	1.67949592425526e-05	NDUFAF7	4.93694143822822e-06	postnatal	All OXPHOS	Heart	prenatal vs postnatal	human
6524.81	2.15398	0.228942	9.4084	5.03732659700769e-21	1.38917806580878e-19	NDUFAB1	1.72244070736392e-20	postnatal	All OXPHOS	Heart	prenatal vs postnatal	human
1232.49	1.48767	0.245616	6.0569	1.38766773084738e-09	1.01296297205964e-08	COX10	2.07172928830736e-09	postnatal	All OXPHOS	Heart	prenatal vs postnatal	human
19001.2	2.25571	0.222381	10.1434	3.54464221787422e-24	1.35665922917684e-22	UQCRC1	1.97753723734036e-23	postnatal	All OXPHOS	Heart	prenatal vs postnatal	human
1438.99	0.0460666	0.149446	0.308249	0.757893	0.813771	COX15	0.765111	postnatal	All OXPHOS	Heart	prenatal vs postnatal	human
3893.78	1.81846	0.317997	5.7185	1.07468385521994e-08	6.94578785899356e-08	NDUFS1	1.51888651537751e-08	postnatal	All OXPHOS	Heart	prenatal vs postnatal	human
8007.56	2.36801	0.222204	10.6569	1.61867637965292e-26	7.89836424588207e-25	NDUFB4	1.7157969624321e-25	postnatal	All OXPHOS	Heart	prenatal vs postnatal	human
18587.8	1.77489	0.273663	6.48568	8.8333880917713e-11	7.57020786983394e-10	SDHA	1.37696932018788e-10	postnatal	All OXPHOS	Heart	prenatal vs postnatal	human
1310.94	1.02269	0.15504	6.59633	4.21466381533546e-11	3.7759218809003e-10	BCS1L	6.66797558844117e-11	postnatal	All OXPHOS	Heart	prenatal vs postnatal	human
6378.73	2.14845	0.197657	10.8695	1.61008435594862e-27	8.31677753159634e-26	NDUFB2	2.13336177163193e-26	postnatal	All OXPHOS	Heart	prenatal vs postnatal	human
6435.56	3.01207	0.244858	12.3013	8.91431431013723e-35	7.85856235200665e-33	NDUFB7	4.72458658437273e-33	postnatal	All OXPHOS	Heart	prenatal vs postnatal	human
3020.99	0.994092	0.197455	5.03453	4.79018901912467e-07	2.43299652369484e-06	UQCC1	6.34700045034019e-07	postnatal	All OXPHOS	Heart	prenatal vs postnatal	human
1294.2	0.723896	0.200485	3.61072	0.000305346	0.000930678	NDUFAF5	0.000376357	postnatal	All OXPHOS	Heart	prenatal vs postnatal	human
2229.68	0.405128	0.146242	2.77026	0.00560114	0.0128946	COA1	0.0065969	postnatal	All OXPHOS	Heart	prenatal vs postnatal	human
3657.35	1.88206	0.194808	9.66113	4.40989944965434e-22	1.36248377038561e-20	NDUFC1	1.79788208332061e-21	postnatal	All OXPHOS	Heart	prenatal vs postnatal	human
1812.98	0.347141	0.139061	2.49632	0.012549	0.0263923	FOXRED1	0.014151	postnatal	All OXPHOS	Heart	prenatal vs postnatal	human
5343.92	2.37734	0.207236	11.4716	1.83146666853978e-30	1.21395486172611e-28	NDUFS8	3.88270933730434e-29	postnatal	All OXPHOS	Heart	prenatal vs postnatal	human
1865.82	-0.185472	0.287138	-0.645935	0.518321	0.606416	COX6A1	0.538648	prenatal	All OXPHOS	Heart	prenatal vs postnatal	human
6736.02	1.83021	0.201031	9.10413	8.69581894975435e-20	2.09261441095681e-18	COX7A2	2.4256758122999e-19	postnatal	All OXPHOS	Heart	prenatal vs postnatal	human
3234.25	1.72032	0.167996	10.2402	1.30956689985911e-24	5.18474787433739e-23	TIMMDC1	8.16553478735678e-24	postnatal	All OXPHOS	Heart	prenatal vs postnatal	human
6802.74	2.03804	0.237479	8.58198	9.32501212074919e-18	1.80672963778354e-16	NDUFS7	1.97690256959883e-17	postnatal	All OXPHOS	Heart	prenatal vs postnatal	human
3423.95	0.90512	0.158152	5.72312	1.04584290912602e-08	6.76765535053971e-08	COX7A2L	1.49809930226159e-08	postnatal	All OXPHOS	Heart	prenatal vs postnatal	human
6592.42	2.4702	0.232128	10.6415	1.91001663568735e-26	9.25168680659768e-25	SDHB	1.84056148529872e-25	postnatal	All OXPHOS	Heart	prenatal vs postnatal	human
3826.33	2.32242	0.229201	10.1327	3.95603915608144e-24	1.50757013776493e-22	NDUFB3	2.09670075272316e-23	postnatal	All OXPHOS	Heart	prenatal vs postnatal	human
5313.44	1.89124	0.196382	9.63043	5.94826780712388e-22	1.80199127943878e-20	NDUFA8	2.33524587983382e-21	postnatal	All OXPHOS	Heart	prenatal vs postnatal	human
4354.16	1.57426	0.18812	8.36838	5.84169357581385e-17	1.05170367596698e-15	ATPAF1	1.12585367097503e-16	postnatal	All OXPHOS	Heart	prenatal vs postnatal	human
1440.94	1.32118	0.155907	8.47417	2.36768915042395e-17	4.41595733154176e-16	NDUFAF4	4.7353783008479e-17	postnatal	All OXPHOS	Heart	prenatal vs postnatal	human
10068.4	2.36067	0.250276	9.43226	4.01346447979901e-21	1.11262154189984e-19	NDUFA1	1.41809078286232e-20	postnatal	All OXPHOS	Heart	prenatal vs postnatal	human
15801.3	2.17846	0.208307	10.458	1.34717532163887e-25	5.85036875720576e-24	COX6B1	1.020004172098e-24	postnatal	All OXPHOS	Heart	prenatal vs postnatal	human
18353.6	1.63421	0.183893	8.88676	6.29187429286893e-19	1.37863462654105e-17	COX7C	1.58794922629549e-18	postnatal	All OXPHOS	Heart	prenatal vs postnatal	human
2071.22	1.90425	0.20328	9.36764	7.41722308111056e-21	2.00986986502183e-19	UQCR11	2.45695514561787e-20	postnatal	All OXPHOS	Heart	prenatal vs postnatal	human
5640.68	0.72895	0.222367	3.27814	0.00104492	0.00286165	NDUFA5	0.00127312	postnatal	All OXPHOS	Heart	prenatal vs postnatal	human
3576.58	2.05409	0.214896	9.55855	1.19417658260148e-21	3.50915423111792e-20	ECSIT	4.52081134841988e-21	postnatal	All OXPHOS	Heart	prenatal vs postnatal	human
8022.13	1.16057	0.169644	6.84122	7.8521149049329e-12	7.68559892267803e-11	NDUFA10	1.26109724230741e-11	postnatal	All OXPHOS	Heart	prenatal vs postnatal	human
288.681	2.28449	0.433275	5.2726	1.34506303731012e-07	7.42338942982906e-07	COX4I2	1.82790617890863e-07	postnatal	All OXPHOS	Heart	prenatal vs postnatal	human
31029.8	2.32936	0.202629	11.4957	1.3861819905791e-30	9.25766543051654e-29	COX4I1	3.67338227503462e-29	postnatal	All OXPHOS	Heart	prenatal vs postnatal	human
15784.8	2.17565	0.221672	9.81474	9.72883598093176e-23	3.20421575576217e-21	COX7B	4.48372440860333e-22	postnatal	All OXPHOS	Heart	prenatal vs postnatal	human
3003.45	1.97303	0.217021	9.09145	9.77302865920522e-20	2.3390704882353e-18	NDUFA2	2.65625907147629e-19	postnatal	All OXPHOS	Heart	prenatal vs postnatal	human
1441.59	0.382324	0.138329	2.76387	0.00571201	0.0131202	SCO1	0.00665355	postnatal	All OXPHOS	Heart	prenatal vs postnatal	human
17195.2	2.49809	0.289136	8.63985	5.62848394858611e-18	1.1225981522493e-16	COX5B	1.24295687197943e-17	postnatal	All OXPHOS	Heart	prenatal vs postnatal	human
6253.68	1.28269	0.201742	6.35804	2.04338296798097e-10	1.67518131910083e-09	NDUFB5	3.13911006675338e-10	postnatal	All OXPHOS	Heart	prenatal vs postnatal	human
2986.63	1.4371	0.192973	7.44716	9.53677095760308e-14	1.19932944134916e-12	UQCC2	1.60459955794591e-13	postnatal	All OXPHOS	Heart	prenatal vs postnatal	human
1061.96	1.85864	0.216935	8.5677	1.0556943830522e-17	2.03054177080592e-16	NDUFAF1	2.19418832555947e-17	postnatal	All OXPHOS	Heart	prenatal vs postnatal	human
1930.34	1.92248	0.208659	9.21346	3.15764359956869e-20	7.99140672514767e-19	COX17	9.84441828100827e-20	postnatal	All OXPHOS	Heart	prenatal vs postnatal	human
1481.38	1.40964	0.182281	7.73335	1.04750351139878e-14	1.48304739646486e-13	NDUFA9	1.88195546115713e-14	postnatal	All OXPHOS	Heart	prenatal vs postnatal	human
16308.6	1.64233	0.21738	7.55509	4.18556942474889e-14	5.49358583505379e-13	UQCRC2	7.15597353263519e-14	postnatal	All OXPHOS	Heart	prenatal vs postnatal	human
9503.06	2.92756	0.231571	12.6422	1.23620919472507e-36	1.18456610771355e-34	NDUFB10	1.31038174640858e-34	postnatal	All OXPHOS	Heart	prenatal vs postnatal	human
3059.85	0.867269	0.193928	4.47212	7.74472471021651e-06	3.23016455466166e-05	SDHC	9.77310499146369e-06	postnatal	All OXPHOS	Heart	prenatal vs postnatal	human
5268.36	1.88962	0.262583	7.19628	6.18791371408743e-13	7.00864042811436e-12	NDUFS6	1.02487320889573e-12	postnatal	All OXPHOS	Heart	prenatal vs postnatal	human
4578.01	1.87699	0.205425	9.13714	6.41281211573221e-20	1.56891435730592e-18	NDUFB11	1.83718401153409e-19	postnatal	All OXPHOS	Heart	prenatal vs postnatal	human
9847.08	2.5022	0.230993	10.8324	2.41849389958802e-27	1.23957186361249e-25	NDUFB9	2.84844837062589e-26	postnatal	All OXPHOS	Heart	prenatal vs postnatal	human
786.575	1.99901	0.176086	11.3525	7.21065928909311e-30	4.44522858318521e-28	SURF1	1.27388314107312e-28	postnatal	All OXPHOS	Heart	prenatal vs postnatal	human
720.684	0.497181	0.203974	2.43747	0.0147903	0.0304926	NDUFC2	0.0165029	postnatal	All OXPHOS	Heart	prenatal vs postnatal	human
799.101	-0.0856336	0.194312	-0.440702	0.659429	0.73151	NUBPL	0.67211	prenatal	All OXPHOS	Heart	prenatal vs postnatal	human
592.317	1.63612	0.215821	7.5809	3.4316211001019e-14	4.54689795763502e-13	SDHAF4	5.96314486247215e-14	postnatal	All OXPHOS	Heart	prenatal vs postnatal	human
629.597	0.865198	0.19137	4.52107	6.15271184206236e-06	2.60949284024094e-05	NDUFAF6	7.85768018383867e-06	postnatal	All OXPHOS	Heart	prenatal vs postnatal	human
24128.4	2.35247	0.22351	10.5251	6.61735869837706e-26	2.971295169711e-24	UQCRB	5.83349045042214e-25	postnatal	All OXPHOS	Heart	prenatal vs postnatal	human
16488.5	4.97171	0.439892	11.3021	1.28095575300917e-29	7.78791650570883e-28	COX6A2	1.93973299741388e-28	postnatal	All OXPHOS	Heart	prenatal vs postnatal	human
10354.9	1.59205	0.204135	7.79899	6.24033766491421e-15	9.1181331615462e-14	NDUFS2	1.14047550427743e-14	postnatal	All OXPHOS	Heart	prenatal vs postnatal	human
3419.11	1.74483	0.176711	9.87391	5.40175473511805e-23	1.83154112153419e-21	NDUFV3	2.72660000915483e-22	postnatal	All OXPHOS	Heart	prenatal vs postnatal	human
12.6051	-5.4317	1.07379	-5.05842	4.22740727766308e-07	2.16587059806965e-06	COX6B2	5.67221735990235e-07	prenatal	All OXPHOS	Heart	prenatal vs postnatal	human
15232.2	4.23216	0.409477	10.3355	4.8682218618694e-25	2.02436892422736e-23	COX7A1	3.44021011572104e-24	postnatal	All OXPHOS	Heart	prenatal vs postnatal	human
626.488	0.266591	0.190297	1.40092	0.161239	0.234018	COA7	0.172639	postnatal	All OXPHOS	Heart	prenatal vs postnatal	human
752.101	0.126603	0.141792	0.892879	0.371922	0.465708	COX18	0.394237	postnatal	All OXPHOS	Heart	prenatal vs postnatal	human
628.529	1.59983	0.173839	9.20294	3.48284393641849e-20	8.74746187905602e-19	NDUFAF2	1.05480416360103e-19	postnatal	All OXPHOS	Heart	prenatal vs postnatal	human
2716.23	1.67881	0.192048	8.74162	2.29801298457916e-18	4.73698748270967e-17	NDUFS4	5.41309725256425e-18	postnatal	All OXPHOS	Heart	prenatal vs postnatal	human
7951.5	2.30575	0.238355	9.6736	3.90409673245057e-22	1.21615602218045e-20	UQCRQ	1.65533701455904e-21	postnatal	All OXPHOS	Heart	prenatal vs postnatal	human
11958.2	1.63695	0.234316	6.98608	2.82666138010323e-12	2.92704438212961e-11	COX6C	4.60963240447604e-12	postnatal	All OXPHOS	Heart	prenatal vs postnatal	human
2403.26	1.40786	0.174839	8.05235	8.12225649101575e-16	1.2987262238083e-14	NDUFB6	1.5374271215137e-15	postnatal	All OXPHOS	Heart	prenatal vs postnatal	human
1554.83	1.22396	0.223751	5.47019	4.49543739901119e-08	2.65856066394564e-07	NDUFB8	6.1885242116258e-08	postnatal	All OXPHOS	Heart	prenatal vs postnatal	human
1362.74	0.399033	0.158757	2.51348	0.0119545	0.0252686	COX11	0.0137737	postnatal	All OXPHOS	Heart	prenatal vs postnatal	human
14013.6	1.75163	0.202384	8.65498	4.93002480880867e-18	9.90010372957957e-17	NDUFV1	1.11187793560366e-17	postnatal	All OXPHOS	Heart	prenatal vs postnatal	human
241.438	1.16995	0.131788	8.87749	6.83859056359083e-19	1.49347815553498e-17	SDHAF2	1.68579209242006e-18	postnatal	All OXPHOS	Heart	prenatal vs postnatal	human
641.734	0.472618	0.199339	2.37092	0.0177437	0.0357402	COA6	0.019592	postnatal	All OXPHOS	Heart	prenatal vs postnatal	human
11116.8	1.68068	0.200669	8.3754	5.50347070371386e-17	9.93517335843825e-16	NDUFS5	1.0803109159142e-16	postnatal	All OXPHOS	Heart	prenatal vs postnatal	human
6912.82	2.03645	0.233503	8.72129	2.75049319984099e-18	5.63893749272828e-17	UQCRFS1	6.33809302572055e-18	postnatal	All OXPHOS	Heart	prenatal vs postnatal	human
3092.26	2.71768	0.293484	9.26007	2.0429399565623e-20	5.28148905485858e-19	NDUFA3	6.56217076956376e-20	postnatal	All OXPHOS	Heart	prenatal vs postnatal	human
1758.04	0.1761	0.200548	0.87809	0.379895	0.473606	TMEM126B	0.398701	postnatal	All OXPHOS	Heart	prenatal vs postnatal	human
817.329	1.20892	0.140624	8.59687	8.19202407999649e-18	1.59892591028537e-16	ATPAF2	1.77215214791761e-17	postnatal	All OXPHOS	Heart	prenatal vs postnatal	human
13573.2	0.646533	0.217155	2.97729	0.00290807	0.00718647	CYCS	0.00346354	postnatal	All OXPHOS	Heart	prenatal vs postnatal	human
11358.6	1.43439	0.185831	7.71878	1.17449553418191e-14	1.65047201873056e-13	UQCRH	2.07494211038805e-14	postnatal	All OXPHOS	Heart	prenatal vs postnatal	human
1604.08	1.37439	0.292593	4.69727	2.6366327801377e-06	1.19259495700875e-05	NDUFA11	3.45040832956292e-06	postnatal	All OXPHOS	Heart	prenatal vs postnatal	human
8842.45	2.07667	0.211409	9.82298	8.9653278790502e-23	2.96382533021551e-21	COX8A	4.31965797808782e-22	postnatal	All OXPHOS	Heart	prenatal vs postnatal	human
1885.34	0.895612	0.152879	5.85831	4.67598897565623e-09	3.18562288612005e-08	ACAD9	6.78979221122685e-09	postnatal	All OXPHOS	Heart	prenatal vs postnatal	human
2701.68	1.73388	0.218996	7.91741	2.42512712717761e-15	3.68605385818772e-14	NDUFAF3	4.50988553475135e-15	postnatal	All OXPHOS	Heart	prenatal vs postnatal	human
41.7536	-1.6866	0.428249	-3.93836	8.20419681153235e-05	0.000281344	NDUFV2	0.000102311	prenatal	All OXPHOS	Heart	prenatal vs postnatal	human
1809.73	2.66829	0.220316	12.1112	9.21093811415419e-34	7.61255250953237e-32	COX14	3.25453146700115e-32	postnatal	All OXPHOS	Heart	prenatal vs postnatal	human
15244.3	2.22167	0.21733	10.2225	1.57154170645173e-24	6.18490528430489e-23	COX5A	9.25463449354907e-24	postnatal	All OXPHOS	Heart	prenatal vs postnatal	human
11989.6	2.5612	0.243512	10.5178	7.15428074108376e-26	3.20151036818007e-24	CYC1	5.83349045042214e-25	postnatal	All OXPHOS	Heart	prenatal vs postnatal	human
1200.42	0.92022	0.146968	6.26137	3.81600520002184e-10	3.01349326739258e-09	COA4	5.77852216003307e-10	postnatal	All OXPHOS	Heart	prenatal vs postnatal	human
1375.15	0.339479	0.163339	2.07837	0.0376751	0.0687974	COA5	0.0411707	postnatal	All OXPHOS	Heart	prenatal vs postnatal	human
4698.43	1.88496	0.213469	8.83011	1.0456847978122e-18	2.24970458288045e-17	NDUFB1	2.51914974018395e-18	postnatal	All OXPHOS	Heart	prenatal vs postnatal	human
1634.05	1.40905	0.164949	8.54235	1.31524931672793e-17	2.50608059650603e-16	COA3	2.68108514563771e-17	postnatal	All OXPHOS	Heart	prenatal vs postnatal	human
6659.49	1.96191	0.213935	9.17061	4.70343934073122e-20	1.16362825298708e-18	UQCR10	1.38490158365975e-19	postnatal	All OXPHOS	Heart	prenatal vs postnatal	human
4348.75	1.6768	0.17654	9.49817	2.13613802374324e-21	6.11411713354301e-20	NDUFA12	7.8079527764408e-21	postnatal	All OXPHOS	Heart	prenatal vs postnatal	human
2974.83	1.87657	0.207584	9.04004	1.56621422863261e-19	3.65592830579406e-18	NDUFA6	4.15046770587642e-19	postnatal	All OXPHOS	Heart	prenatal vs postnatal	human
187.777	0.567588	0.277884	2.04253	0.0410988	0.0740624	NDUFA13	0.0444538	postnatal	All OXPHOS	Heart	prenatal vs postnatal	human
21039.2	2.2065	0.214402	10.2914	7.70310022714869e-25	3.10082026951905e-23	NDUFA4	5.10330390048601e-24	postnatal	All OXPHOS	Heart	prenatal vs postnatal	human
474.541	0.65657	0.207076	3.17067	0.00152089	0.00401748	SDHAF3	0.00183198	postnatal	All OXPHOS	Heart	prenatal vs postnatal	human
2979.23	0.529724	0.211393	2.50588	0.0122148	0.0257612	COX20	0.0139223	postnatal	All OXPHOS	Heart	prenatal vs postnatal	human
3808.09	1.28678	0.228496	5.6315	1.78643978431719e-08	1.1206350326337e-07	SDHD	2.49161338338977e-08	postnatal	All OXPHOS	Heart	prenatal vs postnatal	human
474.448	1.14518	0.1907	6.00516	1.91137836714911e-09	1.37103942706787e-08	UQCC3	2.81397370719174e-09	postnatal	All OXPHOS	Heart	prenatal vs postnatal	human
368.945	1.86743	0.190871	9.78375	1.32214037043042e-22	4.30094051374827e-21	SDHAF1	5.83945330273437e-22	postnatal	All OXPHOS	Heart	prenatal vs postnatal	human
5362.73	1.80616	0.201399	8.96805	3.01805656657895e-19	6.81627173495419e-18	NDUFS3	7.80278039164315e-19	postnatal	All OXPHOS	Heart	prenatal vs postnatal	human
476.23	-0.0191942	0.177761	-0.107977	0.914014	0.937626	COX19	0.914014	prenatal	All OXPHOS	Heart	prenatal vs postnatal	human
14.0187	0.196608	0.382898	0.513473	0.60762	0.68592	NDUFA7	0.625318	postnatal	All OXPHOS	Heart	prenatal vs postnatal	human
931.516	0.520723	0.112687	4.62099	3.81914337674259e-06	1.67949592425526e-05	NDUFAF7	4.77392922092823e-06	postnatal	Complex I	Heart	prenatal vs postnatal	human
6524.81	2.15398	0.228942	9.4084	5.03732659700769e-21	1.38917806580878e-19	NDUFAB1	1.67910886566923e-20	postnatal	Complex I	Heart	prenatal vs postnatal	human
3893.78	1.81846	0.317997	5.7185	1.07468385521994e-08	6.94578785899356e-08	NDUFS1	1.45227548002694e-08	postnatal	Complex I	Heart	prenatal vs postnatal	human
8007.56	2.36801	0.222204	10.6569	1.61867637965292e-26	7.89836424588207e-25	NDUFB4	1.3488969830441e-25	postnatal	Complex I	Heart	prenatal vs postnatal	human
6378.73	2.14845	0.197657	10.8695	1.61008435594862e-27	8.31677753159634e-26	NDUFB2	2.01260544493578e-26	postnatal	Complex I	Heart	prenatal vs postnatal	human
6435.56	3.01207	0.244858	12.3013	8.91431431013723e-35	7.85856235200665e-33	NDUFB7	2.22857857753431e-33	postnatal	Complex I	Heart	prenatal vs postnatal	human
1294.2	0.723896	0.200485	3.61072	0.000305346	0.000930678	NDUFAF5	0.000355054	postnatal	Complex I	Heart	prenatal vs postnatal	human
3657.35	1.88206	0.194808	9.66113	4.40989944965434e-22	1.36248377038561e-20	NDUFC1	2.20494972482717e-21	postnatal	Complex I	Heart	prenatal vs postnatal	human
1812.98	0.347141	0.139061	2.49632	0.012549	0.0263923	FOXRED1	0.0139433	postnatal	Complex I	Heart	prenatal vs postnatal	human
5343.92	2.37734	0.207236	11.4716	1.83146666853978e-30	1.21395486172611e-28	NDUFS8	3.05244444756631e-29	postnatal	Complex I	Heart	prenatal vs postnatal	human
3234.25	1.72032	0.167996	10.2402	1.30956689985911e-24	5.18474787433739e-23	TIMMDC1	9.3540492847079e-24	postnatal	Complex I	Heart	prenatal vs postnatal	human
6802.74	2.03804	0.237479	8.58198	9.32501212074919e-18	1.80672963778354e-16	NDUFS7	1.86500242414984e-17	postnatal	Complex I	Heart	prenatal vs postnatal	human
3826.33	2.32242	0.229201	10.1327	3.95603915608144e-24	1.50757013776493e-22	NDUFB3	2.4725244725509e-23	postnatal	Complex I	Heart	prenatal vs postnatal	human
5313.44	1.89124	0.196382	9.63043	5.94826780712388e-22	1.80199127943878e-20	NDUFA8	2.70375809414722e-21	postnatal	Complex I	Heart	prenatal vs postnatal	human
1440.94	1.32118	0.155907	8.47417	2.36768915042395e-17	4.41595733154176e-16	NDUFAF4	4.38460953782213e-17	postnatal	Complex I	Heart	prenatal vs postnatal	human
10068.4	2.36067	0.250276	9.43226	4.01346447979901e-21	1.11262154189984e-19	NDUFA1	1.43338017135679e-20	postnatal	Complex I	Heart	prenatal vs postnatal	human
5640.68	0.72895	0.222367	3.27814	0.00104492	0.00286165	NDUFA5	0.00118741	postnatal	Complex I	Heart	prenatal vs postnatal	human
3576.58	2.05409	0.214896	9.55855	1.19417658260148e-21	3.50915423111792e-20	ECSIT	4.9757357608395e-21	postnatal	Complex I	Heart	prenatal vs postnatal	human
8022.13	1.16057	0.169644	6.84122	7.8521149049329e-12	7.68559892267803e-11	NDUFA10	1.15472278013719e-11	postnatal	Complex I	Heart	prenatal vs postnatal	human
3003.45	1.97303	0.217021	9.09145	9.77302865920522e-20	2.3390704882353e-18	NDUFA2	2.57184964715927e-19	postnatal	Complex I	Heart	prenatal vs postnatal	human
6253.68	1.28269	0.201742	6.35804	2.04338296798097e-10	1.67518131910083e-09	NDUFB5	2.9191185256871e-10	postnatal	Complex I	Heart	prenatal vs postnatal	human
1061.96	1.85864	0.216935	8.5677	1.0556943830522e-17	2.03054177080592e-16	NDUFAF1	2.03018150586961e-17	postnatal	Complex I	Heart	prenatal vs postnatal	human
1481.38	1.40964	0.182281	7.73335	1.04750351139878e-14	1.48304739646486e-13	NDUFA9	1.63672423656059e-14	postnatal	Complex I	Heart	prenatal vs postnatal	human
9503.06	2.92756	0.231571	12.6422	1.23620919472507e-36	1.18456610771355e-34	NDUFB10	6.18104597362537e-35	postnatal	Complex I	Heart	prenatal vs postnatal	human
5268.36	1.88962	0.262583	7.19628	6.18791371408743e-13	7.00864042811436e-12	NDUFS6	9.37562683952641e-13	postnatal	Complex I	Heart	prenatal vs postnatal	human
4578.01	1.87699	0.205425	9.13714	6.41281211573221e-20	1.56891435730592e-18	NDUFB11	1.7813366988145e-19	postnatal	Complex I	Heart	prenatal vs postnatal	human
9847.08	2.5022	0.230993	10.8324	2.41849389958802e-27	1.23957186361249e-25	NDUFB9	2.41849389958802e-26	postnatal	Complex I	Heart	prenatal vs postnatal	human
720.684	0.497181	0.203974	2.43747	0.0147903	0.0304926	NDUFC2	0.0160764	postnatal	Complex I	Heart	prenatal vs postnatal	human
799.101	-0.0856336	0.194312	-0.440702	0.659429	0.73151	NUBPL	0.659429	prenatal	Complex I	Heart	prenatal vs postnatal	human
629.597	0.865198	0.19137	4.52107	6.15271184206236e-06	2.60949284024094e-05	NDUFAF6	7.50330712446629e-06	postnatal	Complex I	Heart	prenatal vs postnatal	human
10354.9	1.59205	0.204135	7.79899	6.24033766491421e-15	9.1181331615462e-14	NDUFS2	1.00650607498616e-14	postnatal	Complex I	Heart	prenatal vs postnatal	human
3419.11	1.74483	0.176711	9.87391	5.40175473511805e-23	1.83154112153419e-21	NDUFV3	3.00097485284336e-22	postnatal	Complex I	Heart	prenatal vs postnatal	human
628.529	1.59983	0.173839	9.20294	3.48284393641849e-20	8.74746187905602e-19	NDUFAF2	1.0243658636525e-19	postnatal	Complex I	Heart	prenatal vs postnatal	human
2716.23	1.67881	0.192048	8.74162	2.29801298457916e-18	4.73698748270967e-17	NDUFS4	4.99568040125905e-18	postnatal	Complex I	Heart	prenatal vs postnatal	human
2403.26	1.40786	0.174839	8.05235	8.12225649101575e-16	1.2987262238083e-14	NDUFB6	1.40038905017513e-15	postnatal	Complex I	Heart	prenatal vs postnatal	human
1554.83	1.22396	0.223751	5.47019	4.49543739901119e-08	2.65856066394564e-07	NDUFB8	5.91504920922526e-08	postnatal	Complex I	Heart	prenatal vs postnatal	human
14013.6	1.75163	0.202384	8.65498	4.93002480880867e-18	9.90010372957957e-17	NDUFV1	1.02708850183514e-17	postnatal	Complex I	Heart	prenatal vs postnatal	human
11116.8	1.68068	0.200669	8.3754	5.50347070371386e-17	9.93517335843825e-16	NDUFS5	9.82762625663189e-17	postnatal	Complex I	Heart	prenatal vs postnatal	human
3092.26	2.71768	0.293484	9.26007	2.0429399565623e-20	5.28148905485858e-19	NDUFA3	6.3841873642572e-20	postnatal	Complex I	Heart	prenatal vs postnatal	human
1758.04	0.1761	0.200548	0.87809	0.379895	0.473606	TMEM126B	0.395724	postnatal	Complex I	Heart	prenatal vs postnatal	human
1604.08	1.37439	0.292593	4.69727	2.6366327801377e-06	1.19259495700875e-05	NDUFA11	3.38029843607398e-06	postnatal	Complex I	Heart	prenatal vs postnatal	human
1885.34	0.895612	0.152879	5.85831	4.67598897565623e-09	3.18562288612005e-08	ACAD9	6.49442913285587e-09	postnatal	Complex I	Heart	prenatal vs postnatal	human
2701.68	1.73388	0.218996	7.91741	2.42512712717761e-15	3.68605385818772e-14	NDUFAF3	4.04187854529602e-15	postnatal	Complex I	Heart	prenatal vs postnatal	human
41.7536	-1.6866	0.428249	-3.93836	8.20419681153235e-05	0.000281344	NDUFV2	9.76690096610994e-05	prenatal	Complex I	Heart	prenatal vs postnatal	human
4698.43	1.88496	0.213469	8.83011	1.0456847978122e-18	2.24970458288045e-17	NDUFB1	2.3765563586641e-18	postnatal	Complex I	Heart	prenatal vs postnatal	human
4348.75	1.6768	0.17654	9.49817	2.13613802374324e-21	6.11411713354301e-20	NDUFA12	8.21591547593553e-21	postnatal	Complex I	Heart	prenatal vs postnatal	human
2974.83	1.87657	0.207584	9.04004	1.56621422863261e-19	3.65592830579406e-18	NDUFA6	3.91553557158153e-19	postnatal	Complex I	Heart	prenatal vs postnatal	human
187.777	0.567588	0.277884	2.04253	0.0410988	0.0740624	NDUFA13	0.0437221	postnatal	Complex I	Heart	prenatal vs postnatal	human
5362.73	1.80616	0.201399	8.96805	3.01805656657895e-19	6.81627173495419e-18	NDUFS3	7.18584896804513e-19	postnatal	Complex I	Heart	prenatal vs postnatal	human
14.0187	0.196608	0.382898	0.513473	0.60762	0.68592	NDUFA7	0.620021	postnatal	Complex I	Heart	prenatal vs postnatal	human
19001.2	2.25571	0.222381	10.1434	3.54464221787422e-24	1.35665922917684e-22	UQCRC1	1.6541663683413e-23	postnatal	Complex III	Heart	prenatal vs postnatal	human
1310.94	1.02269	0.15504	6.59633	4.21466381533546e-11	3.7759218809003e-10	BCS1L	5.36411758315422e-11	postnatal	Complex III	Heart	prenatal vs postnatal	human
3020.99	0.994092	0.197455	5.03453	4.79018901912467e-07	2.43299652369484e-06	UQCC1	5.15866509751887e-07	postnatal	Complex III	Heart	prenatal vs postnatal	human
2071.22	1.90425	0.20328	9.36764	7.41722308111056e-21	2.00986986502183e-19	UQCR11	2.07682246271096e-20	postnatal	Complex III	Heart	prenatal vs postnatal	human
2986.63	1.4371	0.192973	7.44716	9.53677095760308e-14	1.19932944134916e-12	UQCC2	1.33514793406443e-13	postnatal	Complex III	Heart	prenatal vs postnatal	human
16308.6	1.64233	0.21738	7.55509	4.18556942474889e-14	5.49358583505379e-13	UQCRC2	6.5108857718316e-14	postnatal	Complex III	Heart	prenatal vs postnatal	human
24128.4	2.35247	0.22351	10.5251	6.61735869837706e-26	2.971295169711e-24	UQCRB	5.00799651875863e-25	postnatal	Complex III	Heart	prenatal vs postnatal	human
7951.5	2.30575	0.238355	9.6736	3.90409673245057e-22	1.21615602218045e-20	UQCRQ	1.3664338563577e-21	postnatal	Complex III	Heart	prenatal vs postnatal	human
6912.82	2.03645	0.233503	8.72129	2.75049319984099e-18	5.63893749272828e-17	UQCRFS1	5.50098639968199e-18	postnatal	Complex III	Heart	prenatal vs postnatal	human
13573.2	0.646533	0.217155	2.97729	0.00290807	0.00718647	CYCS	0.00290807	postnatal	Complex III	Heart	prenatal vs postnatal	human
11358.6	1.43439	0.185831	7.71878	1.17449553418191e-14	1.65047201873056e-13	UQCRH	2.05536718481835e-14	postnatal	Complex III	Heart	prenatal vs postnatal	human
11989.6	2.5612	0.243512	10.5178	7.15428074108376e-26	3.20151036818007e-24	CYC1	5.00799651875863e-25	postnatal	Complex III	Heart	prenatal vs postnatal	human
6659.49	1.96191	0.213935	9.17061	4.70343934073122e-20	1.16362825298708e-18	UQCR10	1.09746917950395e-19	postnatal	Complex III	Heart	prenatal vs postnatal	human
474.448	1.14518	0.1907	6.00516	1.91137836714911e-09	1.37103942706787e-08	UQCC3	2.22994142834063e-09	postnatal	Complex III	Heart	prenatal vs postnatal	human
1232.49	1.48767	0.245616	6.0569	1.38766773084738e-09	1.01296297205964e-08	COX10	2.54405750655353e-09	postnatal	Complex IV	Heart	prenatal vs postnatal	human
1438.99	0.0460666	0.149446	0.308249	0.757893	0.813771	COX15	0.781577	postnatal	Complex IV	Heart	prenatal vs postnatal	human
2229.68	0.405128	0.146242	2.77026	0.00560114	0.0128946	COA1	0.00785401	postnatal	Complex IV	Heart	prenatal vs postnatal	human
1865.82	-0.185472	0.287138	-0.645935	0.518321	0.606416	COX6A1	0.551761	prenatal	Complex IV	Heart	prenatal vs postnatal	human
6736.02	1.83021	0.201031	9.10413	8.69581894975435e-20	2.09261441095681e-18	COX7A2	2.39135021118245e-19	postnatal	Complex IV	Heart	prenatal vs postnatal	human
3423.95	0.90512	0.158152	5.72312	1.04584290912602e-08	6.76765535053971e-08	COX7A2L	1.81646400006098e-08	postnatal	Complex IV	Heart	prenatal vs postnatal	human
15801.3	2.17846	0.208307	10.458	1.34717532163887e-25	5.85036875720576e-24	COX6B1	8.89135712281652e-25	postnatal	Complex IV	Heart	prenatal vs postnatal	human
18353.6	1.63421	0.183893	8.88676	6.29187429286893e-19	1.37863462654105e-17	COX7C	1.59716808972827e-18	postnatal	Complex IV	Heart	prenatal vs postnatal	human
288.681	2.28449	0.433275	5.2726	1.34506303731012e-07	7.42338942982906e-07	COX4I2	2.2193540115617e-07	postnatal	Complex IV	Heart	prenatal vs postnatal	human
31029.8	2.32936	0.202629	11.4957	1.3861819905791e-30	9.25766543051654e-29	COX4I1	2.28720028445552e-29	postnatal	Complex IV	Heart	prenatal vs postnatal	human
15784.8	2.17565	0.221672	9.81474	9.72883598093176e-23	3.20421575576217e-21	COX7B	3.21051587370748e-22	postnatal	Complex IV	Heart	prenatal vs postnatal	human
1441.59	0.382324	0.138329	2.76387	0.00571201	0.0131202	SCO1	0.00785401	postnatal	Complex IV	Heart	prenatal vs postnatal	human
17195.2	2.49809	0.289136	8.63985	5.62848394858611e-18	1.1225981522493e-16	COX5B	1.3267140735953e-17	postnatal	Complex IV	Heart	prenatal vs postnatal	human
1930.34	1.92248	0.208659	9.21346	3.15764359956869e-20	7.99140672514767e-19	COX17	9.47293079870607e-20	postnatal	Complex IV	Heart	prenatal vs postnatal	human
786.575	1.99901	0.176086	11.3525	7.21065928909311e-30	4.44522858318521e-28	SURF1	7.93172521800242e-29	postnatal	Complex IV	Heart	prenatal vs postnatal	human
16488.5	4.97171	0.439892	11.3021	1.28095575300917e-29	7.78791650570883e-28	COX6A2	1.05678849623256e-28	postnatal	Complex IV	Heart	prenatal vs postnatal	human
12.6051	-5.4317	1.07379	-5.05842	4.22740727766308e-07	2.16587059806965e-06	COX6B2	6.64306857918483e-07	prenatal	Complex IV	Heart	prenatal vs postnatal	human
15232.2	4.23216	0.409477	10.3355	4.8682218618694e-25	2.02436892422736e-23	COX7A1	2.67752202402817e-24	postnatal	Complex IV	Heart	prenatal vs postnatal	human
626.488	0.266591	0.190297	1.40092	0.161239	0.234018	COA7	0.183479	postnatal	Complex IV	Heart	prenatal vs postnatal	human
752.101	0.126603	0.141792	0.892879	0.371922	0.465708	COX18	0.409114	postnatal	Complex IV	Heart	prenatal vs postnatal	human
11958.2	1.63695	0.234316	6.98608	2.82666138010323e-12	2.92704438212961e-11	COX6C	5.82998909646292e-12	postnatal	Complex IV	Heart	prenatal vs postnatal	human
1362.74	0.399033	0.158757	2.51348	0.0119545	0.0252686	COX11	0.0155035	postnatal	Complex IV	Heart	prenatal vs postnatal	human
641.734	0.472618	0.199339	2.37092	0.0177437	0.0357402	COA6	0.0216868	postnatal	Complex IV	Heart	prenatal vs postnatal	human
13573.2	0.646533	0.217155	2.97729	0.00290807	0.00718647	CYCS	0.0043621	postnatal	Complex IV	Heart	prenatal vs postnatal	human
8842.45	2.07667	0.211409	9.82298	8.9653278790502e-23	2.96382533021551e-21	COX8A	3.21051587370748e-22	postnatal	Complex IV	Heart	prenatal vs postnatal	human
1809.73	2.66829	0.220316	12.1112	9.21093811415419e-34	7.61255250953237e-32	COX14	3.03960957767088e-32	postnatal	Complex IV	Heart	prenatal vs postnatal	human
15244.3	2.22167	0.21733	10.2225	1.57154170645173e-24	6.18490528430489e-23	COX5A	6.48260953911338e-24	postnatal	Complex IV	Heart	prenatal vs postnatal	human
1200.42	0.92022	0.146968	6.26137	3.81600520002184e-10	3.01349326739258e-09	COA4	7.40753950592474e-10	postnatal	Complex IV	Heart	prenatal vs postnatal	human
1375.15	0.339479	0.163339	2.07837	0.0376751	0.0687974	COA5	0.0444028	postnatal	Complex IV	Heart	prenatal vs postnatal	human
1634.05	1.40905	0.164949	8.54235	1.31524931672793e-17	2.50608059650603e-16	COA3	2.89354849680146e-17	postnatal	Complex IV	Heart	prenatal vs postnatal	human
21039.2	2.2065	0.214402	10.2914	7.70310022714869e-25	3.10082026951905e-23	NDUFA4	3.63146153565581e-24	postnatal	Complex IV	Heart	prenatal vs postnatal	human
2979.23	0.529724	0.211393	2.50588	0.0122148	0.0257612	COX20	0.0155035	postnatal	Complex IV	Heart	prenatal vs postnatal	human
476.23	-0.0191942	0.177761	-0.107977	0.914014	0.937626	COX19	0.914014	prenatal	Complex IV	Heart	prenatal vs postnatal	human
4354.16	1.57426	0.18812	8.36838	5.84169357581385e-17	1.05170367596698e-15	ATPAF1	5.84169357581385e-17	postnatal	Complex V	Heart	prenatal vs postnatal	human
817.329	1.20892	0.140624	8.59687	8.19202407999649e-18	1.59892591028537e-16	ATPAF2	1.6384048159993e-17	postnatal	Complex V	Heart	prenatal vs postnatal	human
15444.1	0.860679	0.202596	4.24826	2.15441747920613e-05	0.000169336	ACO2	0.000107721	postnatal	MT_replication	HindForebrain/Cerebrum/Cerebellum	prenatal vs postnatal	rabbit
671.058	-0.545845	0.132785	-4.11073	3.94407535579966e-05	0.000172131	POLG2	9.86018838949915e-05	prenatal	MT_replication	Kidney	prenatal vs postnatal	human
39046.8	1.32102	0.333041	3.96653	7.29264608609335e-05	0.000332094	ACO2	0.000182316	postnatal	MT_replication	Heart	prenatal vs postnatal	rabbit
1215.46	-0.871569	0.215768	-4.03938	5.35921300996439e-05	0.00036174	TWNK	0.00013398	prenatal	MT_replication	Forebrain/Cerebrum	prenatal vs postnatal	mouse
12.2521	-4.91143	0.954678	-5.14459	2.68102418343731e-07	1.41727076663233e-06	E2F2	6.5110587312049e-07	prenatal	Positive Response to Hypoxia	Heart	prenatal vs postnatal	human
668.576	1.12907	0.220153	5.12856	2.91966366538147e-07	1.53115893234868e-06	NOP16	6.70733544749797e-07	postnatal	Positive Response to Hypoxia	Heart	prenatal vs postnatal	human
912.403	0.0349619	0.151638	0.230561	0.817656	0.862168	MRTO4	0.837827	postnatal	Positive Response to Hypoxia	Heart	prenatal vs postnatal	human
392.433	-6.23913	0.377295	-16.5365	2.00362422321456e-61	5.1446456146947e-59	MCM10	1.70308058973237e-59	prenatal	Positive Response to Hypoxia	Heart	prenatal vs postnatal	human
1545.2	-0.8017	0.226465	-3.54006	0.000400041	0.00119331	POLR1A	0.000723478	prenatal	Positive Response to Hypoxia	Heart	prenatal vs postnatal	human
1781.11	-1.98905	0.266733	-7.4571	8.84489489076589e-14	1.12084779672298e-12	MCM2	3.58007650340524e-13	prenatal	Positive Response to Hypoxia	Heart	prenatal vs postnatal	human
177.054	-1.3603	0.311749	-4.36343	1.28036193217713e-05	5.13212064569393e-05	TIPIN	2.79053241628348e-05	prenatal	Positive Response to Hypoxia	Heart	prenatal vs postnatal	human
1897.36	-2.5461	0.214332	-11.8792	1.51781582332541e-32	1.18762352306175e-30	MCM6	1.07511954152217e-31	prenatal	Positive Response to Hypoxia	Heart	prenatal vs postnatal	human
337.214	-6.10012	0.503336	-12.1194	8.33826774305694e-34	6.91292059563093e-32	CLSPN	6.44320689236218e-33	prenatal	Positive Response to Hypoxia	Heart	prenatal vs postnatal	human
332.835	-6.16359	0.385585	-15.985	1.62439107203308e-57	3.70347161052233e-55	CDC45	4.6024413707604e-56	prenatal	Positive Response to Hypoxia	Heart	prenatal vs postnatal	human
616.729	-4.19308	0.309041	-13.568	6.19575541373915e-42	7.87784343399804e-40	CDC6	6.58299012709785e-41	prenatal	Positive Response to Hypoxia	Heart	prenatal vs postnatal	human
822.941	-3.47172	0.303467	-11.4402	2.63335426725435e-30	1.69864195868478e-28	CDC7	1.72180855935861e-29	prenatal	Positive Response to Hypoxia	Heart	prenatal vs postnatal	human
249.318	-5.60627	0.38433	-14.5871	3.39220702720971e-48	5.64237102192549e-46	CENPM	5.76675194625651e-47	prenatal	Positive Response to Hypoxia	Heart	prenatal vs postnatal	human
570.644	0.84501	0.203409	4.15424	3.26367252884066e-05	0.000120922	POLR3H	6.9353041237864e-05	postnatal	Positive Response to Hypoxia	Heart	prenatal vs postnatal	human
279.161	-3.75982	0.286919	-13.1041	3.11795227462331e-39	3.40745800855218e-37	POLE2	2.65025943342982e-38	prenatal	Positive Response to Hypoxia	Heart	prenatal vs postnatal	human
3038.76	-0.418909	0.14795	-2.83142	0.00463425	0.0108963	NOP56	0.00743228	prenatal	Positive Response to Hypoxia	Heart	prenatal vs postnatal	human
220.087	-1.24052	0.209494	-5.92151	3.18999861804842e-09	2.2213242088343e-08	POP1	9.34999594945227e-09	prenatal	Positive Response to Hypoxia	Heart	prenatal vs postnatal	human
20.2098	0.650755	0.318218	2.045	0.0408551	0.0736985	PYCR3	0.0598738	postnatal	Positive Response to Hypoxia	Heart	prenatal vs postnatal	human
3464.14	-1.76576	0.267439	-6.60247	4.04373858063099e-11	3.6252459065067e-10	MCM4	1.27302881242087e-10	prenatal	Positive Response to Hypoxia	Heart	prenatal vs postnatal	human
447.085	-4.00481	0.24991	-16.025	8.54594349331682e-58	1.96534406580652e-55	ASF1B	3.63202598465965e-56	prenatal	Positive Response to Hypoxia	Heart	prenatal vs postnatal	human
733.653	0.826164	0.145845	5.66468	1.47301573930894e-08	9.33769109719643e-08	GRWD1	3.91269805753937e-08	postnatal	Positive Response to Hypoxia	Heart	prenatal vs postnatal	human
876.049	0.165287	0.154086	1.07269	0.283409	0.373105	ARMC6	0.33458	postnatal	Positive Response to Hypoxia	Heart	prenatal vs postnatal	human
1315.82	1.38732	0.201224	6.8944	5.40913970537889e-12	5.40980821763413e-11	AIMP2	1.76837259598925e-11	postnatal	Positive Response to Hypoxia	Heart	prenatal vs postnatal	human
1010.05	0.173995	0.283962	0.61274	0.540049	0.626103	NOP2	0.573802	postnatal	Positive Response to Hypoxia	Heart	prenatal vs postnatal	human
115.049	1.99946	0.279301	7.15883	8.1370000379631e-13	9.02302893098575e-12	SPSB2	3.00715218794289e-12	postnatal	Positive Response to Hypoxia	Heart	prenatal vs postnatal	human
443.031	-0.461689	0.17224	-2.6805	0.00735127	0.0164386	UMPS	0.0115715	prenatal	Positive Response to Hypoxia	Heart	prenatal vs postnatal	human
455.764	0.638391	0.183716	3.47488	0.000511076	0.00149254	RRP9	0.00090503	postnatal	Positive Response to Hypoxia	Heart	prenatal vs postnatal	human
3291.58	-0.0310512	0.227453	-0.136517	0.891413	0.920259	ODC1	0.902025	prenatal	Positive Response to Hypoxia	Heart	prenatal vs postnatal	human
408.559	0.177531	0.160404	1.10677	0.268394	0.356981	PNO1	0.321316	postnatal	Positive Response to Hypoxia	Heart	prenatal vs postnatal	human
1550.51	0.286792	0.0989102	2.89952	0.00373739	0.00898816	FARSB	0.0061092	postnatal	Positive Response to Hypoxia	Heart	prenatal vs postnatal	human
892.093	0.0911219	0.134441	0.677782	0.49791	0.587893	WDR77	0.535726	postnatal	Positive Response to Hypoxia	Heart	prenatal vs postnatal	human
638.428	-1.5032	0.26509	-5.67053	1.42356501490165e-08	9.04372422510302e-08	TTF2	3.90332342795613e-08	prenatal	Positive Response to Hypoxia	Heart	prenatal vs postnatal	human
1490.95	0.370304	0.289538	1.27895	0.200915	0.281173	PIK3R3	0.243968	postnatal	Positive Response to Hypoxia	Heart	prenatal vs postnatal	human
271.667	0.367801	0.20317	1.81031	0.0702481	0.116641	EEF2KMT	0.0978866	postnatal	Positive Response to Hypoxia	Heart	prenatal vs postnatal	human
128.413	-0.215565	0.258623	-0.833511	0.404557	0.49792	RPP40	0.458254	prenatal	Positive Response to Hypoxia	Heart	prenatal vs postnatal	human
49.1559	-6.47472	0.863262	-7.5003	6.36742222001006e-14	8.18266353025297e-13	AUNIP	2.84858362474134e-13	prenatal	Positive Response to Hypoxia	Heart	prenatal vs postnatal	human
423.389	1.4321	0.186047	7.69751	1.38738262114983e-14	1.93523777328848e-13	RTN4IP1	6.55152904431865e-14	postnatal	Positive Response to Hypoxia	Heart	prenatal vs postnatal	human
1795.87	0.764142	0.155158	4.92492	8.43949079763816e-07	4.12491615459502e-06	PSME3	1.8877808363138e-06	postnatal	Positive Response to Hypoxia	Heart	prenatal vs postnatal	human
127.567	-0.846197	0.277076	-3.05403	0.0022579	0.00572639	SCLY	0.00383844	prenatal	Positive Response to Hypoxia	Heart	prenatal vs postnatal	human
2419.93	-1.33201	0.231523	-5.75327	8.75351024640081e-09	5.72038238395467e-08	PCNA	2.48016123648023e-08	prenatal	Positive Response to Hypoxia	Heart	prenatal vs postnatal	human
209.444	-0.410358	0.290624	-1.41199	0.157953	0.230121	URB2	0.197441	prenatal	Positive Response to Hypoxia	Heart	prenatal vs postnatal	human
779.893	-0.475795	0.279433	-1.70271	0.0886217	0.14197	SLC5A6	0.119569	prenatal	Positive Response to Hypoxia	Heart	prenatal vs postnatal	human
105.135	0.82965	0.22297	3.7209	0.000198515	0.000630417	ELAC1	0.000383494	postnatal	Positive Response to Hypoxia	Heart	prenatal vs postnatal	human
506.376	1.44691	0.276318	5.23641	1.63732112909282e-07	8.92461498374235e-07	PSEN2	4.09330282273206e-07	postnatal	Positive Response to Hypoxia	Heart	prenatal vs postnatal	human
64.9702	0.661506	0.259214	2.55196	0.0107118	0.0229319	CHAC2	0.0165546	postnatal	Positive Response to Hypoxia	Heart	prenatal vs postnatal	human
267.48	0.993934	0.25933	3.8327	0.000126743	0.000418316	TMEM177	0.000256503	postnatal	Positive Response to Hypoxia	Heart	prenatal vs postnatal	human
607.133	-3.29983	0.242347	-13.6161	3.2116889616161e-42	4.14339209599321e-40	CDCA7	3.89990802481955e-41	prenatal	Positive Response to Hypoxia	Heart	prenatal vs postnatal	human
594.018	0.028853	0.238916	0.120766	0.903876	0.929823	TMEM138	0.903876	postnatal	Positive Response to Hypoxia	Heart	prenatal vs postnatal	human
451.566	-2.32237	0.265384	-8.75098	2.11507023323422e-18	4.38036511028547e-17	SFXN2	1.19853979883273e-17	prenatal	Positive Response to Hypoxia	Heart	prenatal vs postnatal	human
71.4789	-0.181514	0.198018	-0.916657	0.359323	0.453042	FAM86C2P	0.412735	prenatal	Positive Response to Hypoxia	Heart	prenatal vs postnatal	human
192.421	-0.336657	0.21581	-1.55997	0.118768	0.181478	WDR4	0.155311	prenatal	Positive Response to Hypoxia	Heart	prenatal vs postnatal	human
505.228	0.369955	0.227833	1.6238	0.104418	0.162923	GPATCH4	0.13868	postnatal	Positive Response to Hypoxia	Heart	prenatal vs postnatal	human
219.726	-2.83728	0.364509	-7.78384	7.0356208484528e-15	1.02124623808469e-13	TEDC2	3.5178104242264e-14	prenatal	Positive Response to Hypoxia	Heart	prenatal vs postnatal	human
626.488	0.266591	0.190297	1.40092	0.161239	0.234018	COA7	0.198627	postnatal	Positive Response to Hypoxia	Heart	prenatal vs postnatal	human
464.118	-3.73857	0.341238	-10.9559	6.22527032668899e-28	3.31934928084564e-26	CDC25A	3.7796284126326e-27	prenatal	Positive Response to Hypoxia	Heart	prenatal vs postnatal	human
299.916	1.66466	0.191405	8.6971	3.40466761122537e-18	6.91045620215482e-17	MON1A	1.80872966846348e-17	postnatal	Positive Response to Hypoxia	Heart	prenatal vs postnatal	human
701.987	1.01662	0.169482	5.99841	1.99263196996274e-09	1.42661444801312e-08	SLC27A4	6.04906133738688e-09	postnatal	Positive Response to Hypoxia	Heart	prenatal vs postnatal	human
633.809	0.701875	0.190486	3.68465	0.000229017	0.000717038	POP5	0.000432588	postnatal	Positive Response to Hypoxia	Heart	prenatal vs postnatal	human
918.273	-1.83312	0.251227	-7.29666	2.94988690472491e-13	3.49063351092884e-12	CHAF1A	1.13972903137099e-12	prenatal	Positive Response to Hypoxia	Heart	prenatal vs postnatal	human
58.3467	0.473205	0.307045	1.54116	0.123278	0.187257	SLC43A2	0.156397	postnatal	Positive Response to Hypoxia	Heart	prenatal vs postnatal	human
763.971	-1.49891	0.269387	-5.56413	2.63456021136715e-08	1.60840752331549e-07	FEN1	6.78598842321842e-08	prenatal	Positive Response to Hypoxia	Heart	prenatal vs postnatal	human
60.8969	-0.222621	0.278701	-0.798782	0.424417	0.517305	CHRNA5	0.468512	prenatal	Positive Response to Hypoxia	Heart	prenatal vs postnatal	human
333.472	-0.0492009	0.213943	-0.229972	0.818114	0.862499	RIOX1	0.837827	prenatal	Positive Response to Hypoxia	Heart	prenatal vs postnatal	human
25.5463	0.340916	0.320495	1.06372	0.287457	0.377289	FAM86JP	0.33471	postnatal	Positive Response to Hypoxia	Heart	prenatal vs postnatal	human
188.47	-4.96687	0.371991	-13.3521	1.15107614231016e-40	1.34701374936623e-38	ESCO2	1.08712746773737e-39	prenatal	Positive Response to Hypoxia	Heart	prenatal vs postnatal	human
897.205	-1.46442	0.195678	-7.48381	7.219933985423e-14	9.23334594354362e-13	CTPS1	3.06847194380477e-13	prenatal	Positive Response to Hypoxia	Heart	prenatal vs postnatal	human
22.952	1.19022	0.407875	2.9181	0.00352172	0.00851683	UFSP1	0.00586953	postnatal	Positive Response to Hypoxia	Heart	prenatal vs postnatal	human
397.42	-0.0862596	0.300921	-0.286652	0.774379	0.827074	PUS1	0.81262	prenatal	Positive Response to Hypoxia	Heart	prenatal vs postnatal	human
1373.84	-1.46614	0.207802	-7.05548	1.72005750551047e-12	1.82472366017792e-11	PFAS	5.84819551873561e-12	prenatal	Positive Response to Hypoxia	Heart	prenatal vs postnatal	human
365.619	0.94257	0.246405	3.82529	0.000130621	0.000430309	RRS1	0.000258203	postnatal	Positive Response to Hypoxia	Heart	prenatal vs postnatal	human
786.583	1.13563	0.221121	5.13577	2.80986310750287e-07	1.47973814424788e-06	DCTPP1	6.63439900382623e-07	postnatal	Positive Response to Hypoxia	Heart	prenatal vs postnatal	human
343.825	0.306507	0.156202	1.96225	0.0497333	0.0869906	SCFD2	0.0704556	postnatal	Positive Response to Hypoxia	Heart	prenatal vs postnatal	human
551.39	0.112318	0.163528	0.686845	0.492181	0.582299	PRMT3	0.535726	postnatal	Positive Response to Hypoxia	Heart	prenatal vs postnatal	human
547.587	0.68455	0.190747	3.58879	0.000332215	0.00100539	TOR3A	0.000613876	postnatal	Positive Response to Hypoxia	Heart	prenatal vs postnatal	human
59.1299	-3.14645	0.442218	-7.11515	1.1179051157798e-12	1.21318164124039e-11	HPDL	3.95924728505345e-12	prenatal	Positive Response to Hypoxia	Heart	prenatal vs postnatal	human
410.868	-6.12882	0.417642	-14.6748	9.34803002048712e-49	1.60537240228456e-46	FAM111B	1.98645637935351e-47	prenatal	Positive Response to Hypoxia	Heart	prenatal vs postnatal	human
534.045	-0.722253	0.223741	-3.22808	0.00124624	0.00336113	PRMT6	0.00216184	prenatal	Positive Response to Hypoxia	Heart	prenatal vs postnatal	human
234.853	-0.415112	0.268429	-1.54645	0.121996	0.185619	ATP6V0E2-AS1	0.156397	prenatal	Positive Response to Hypoxia	Heart	prenatal vs postnatal	human
870.315	0.612251	0.152038	4.02697	5.65011898194049e-05	0.000199824	PGAM5	0.000117137	postnatal	Positive Response to Hypoxia	Heart	prenatal vs postnatal	human
190.101	0.431456	0.21724	1.98608	0.0470246	0.0828886	MARS2	0.0677472	postnatal	Positive Response to Hypoxia	Heart	prenatal vs postnatal	human
1350.54	-0.909199	0.426145	-2.13355	0.03288	0.0612163	HMBS	0.0490316	prenatal	Positive Response to Hypoxia	Heart	prenatal vs postnatal	human
1004.78	0.638572	0.253891	2.51514	0.0118985	0.0251744	BOP1	0.0180603	postnatal	Positive Response to Hypoxia	Heart	prenatal vs postnatal	human
415.512	-6.41971	0.469325	-13.6786	1.36269131041558e-42	1.79298990480402e-40	UHRF1	1.93047935642207e-41	prenatal	Positive Response to Hypoxia	Heart	prenatal vs postnatal	human
1.69818	-1.04521	1.2679	-0.824363	0.409733	0.503167	PIGW	0.458254	prenatal	Positive Response to Hypoxia	Heart	prenatal vs postnatal	human
1.67085	-1.95589	1.09147	-1.79198	0.0731355	0.120677	SNORD30	0.100266	prenatal	Positive Response to Hypoxia	Heart	prenatal vs postnatal	human
37009.4	1.07369	0.206713	5.19411	2.05700315931503e-07	1.10347997067758e-06	MDH1	3.23243353606648e-07	postnatal	TCA	Heart	prenatal vs postnatal	human
15459.5	1.2187	0.231673	5.26041	1.43731670668841e-07	7.89464484772342e-07	CS	2.4963921747746e-07	postnatal	TCA	Heart	prenatal vs postnatal	human
2519.84	1.50865	0.143452	10.5168	7.22960987223767e-26	3.22975493734915e-24	IDH3G	1.19288562891922e-24	postnatal	TCA	Heart	prenatal vs postnatal	human
18587.8	1.77489	0.273663	6.48568	8.8333880917713e-11	7.57020786983394e-10	SDHA	2.42918172523711e-10	postnatal	TCA	Heart	prenatal vs postnatal	human
2107.86	1.03458	0.237271	4.36032	1.29872752883425e-05	5.19864491525343e-05	ME2	1.71432033806121e-05	postnatal	TCA	Heart	prenatal vs postnatal	human
6598.28	1.22598	0.220243	5.56647	2.59958027130955e-08	1.58888605119768e-07	DLD	5.10423277306892e-08	postnatal	TCA	Heart	prenatal vs postnatal	human
7003.51	0.793884	0.162417	4.88795	1.01891032340387e-06	4.91018974545595e-06	FH	1.52836548510581e-06	postnatal	TCA	Heart	prenatal vs postnatal	human
24608.8	1.96615	0.260095	7.55938	4.05009150007696e-14	5.32369631722342e-13	ACO2	1.52643227913549e-13	postnatal	TCA	Heart	prenatal vs postnatal	human
5687.72	1.65243	0.163587	10.1012	5.4562287985722e-24	2.05264413991236e-22	IDH3B	6.00185167842942e-23	postnatal	TCA	Heart	prenatal vs postnatal	human
12079.1	1.63607	0.260248	6.28657	3.24554558906799e-10	2.58850857038845e-09	OGDH	8.23869264917258e-10	postnatal	TCA	Heart	prenatal vs postnatal	human
11059.4	0.342963	0.252341	1.35912	0.174107	0.249451	NNT	0.191518	postnatal	TCA	Heart	prenatal vs postnatal	human
6592.42	2.4702	0.232128	10.6415	1.91001663568735e-26	9.25168680659768e-25	SDHB	6.30305489776825e-25	postnatal	TCA	Heart	prenatal vs postnatal	human
5859.51	0.706185	0.176233	4.00712	6.14638993606757e-05	0.000215789	DLST	7.8011872265473e-05	postnatal	TCA	Heart	prenatal vs postnatal	human
2216.65	1.04003	0.170833	6.08799	1.14333969114143e-09	8.4628896757955e-09	ACO1	2.69501498626194e-09	postnatal	TCA	Heart	prenatal vs postnatal	human
12928.7	1.37576	0.211194	6.5142	7.30777566927924e-11	6.33045342697111e-10	PDHA1	2.19233270078377e-10	postnatal	TCA	Heart	prenatal vs postnatal	human
3753.75	1.07977	0.232184	4.65048	3.31165778194178e-06	1.47121240974885e-05	SUCLA2	4.75150899148168e-06	postnatal	TCA	Heart	prenatal vs postnatal	human
2586.93	-1.38592	0.183425	-7.5558	4.16299712491498e-14	5.46667254034888e-13	IREB2	1.52643227913549e-13	prenatal	TCA	Heart	prenatal vs postnatal	human
36.6413	1.17927	0.331341	3.55907	0.000372166	0.00111746	MDH1B	0.000454869	postnatal	TCA	Heart	prenatal vs postnatal	human
1625.35	-0.0688539	0.161458	-0.42645	0.66978	0.740186	IDH1	0.69071	prenatal	TCA	Heart	prenatal vs postnatal	human
3059.85	0.867269	0.193928	4.47212	7.74472471021651e-06	3.23016455466166e-05	SDHC	1.06489964765477e-05	postnatal	TCA	Heart	prenatal vs postnatal	human
13330.5	1.94013	0.22223	8.73027	2.54069049555608e-18	5.22095116829616e-17	MDH2	1.39737977255584e-17	postnatal	TCA	Heart	prenatal vs postnatal	human
4331.33	0.694649	0.214432	3.23948	0.00119749	0.00324223	DLAT	0.00141133	postnatal	TCA	Heart	prenatal vs postnatal	human
1395.67	1.32967	0.24755	5.37132	7.81637829875536e-08	4.46286176310844e-07	ME3	1.43300268810515e-07	postnatal	TCA	Heart	prenatal vs postnatal	human
7056.66	1.76798	0.207135	8.53542	1.39645107454114e-17	2.65125208674727e-16	SUCLG1	6.58326935140823e-17	postnatal	TCA	Heart	prenatal vs postnatal	human
7326.52	0.48454	0.191555	2.52951	0.0114223	0.0242561	IDH3A	0.0129978	postnatal	TCA	Heart	prenatal vs postnatal	human
241.438	1.16995	0.131788	8.87749	6.83859056359083e-19	1.49347815553498e-17	SDHAF2	5.64183721496243e-18	postnatal	TCA	Heart	prenatal vs postnatal	human
5886.84	1.40412	0.159692	8.79268	1.46038410328572e-18	3.09725568400942e-17	PDHB	9.63853508168577e-18	postnatal	TCA	Heart	prenatal vs postnatal	human
2185.95	1.4753	0.281863	5.23409	1.65803032100512e-07	9.03005105016937e-07	SUCLG2	2.73575002965845e-07	postnatal	TCA	Heart	prenatal vs postnatal	human
1141.85	-0.0109499	0.171304	-0.0639207	0.949033	0.963867	FAHD1	0.949033	prenatal	TCA	Heart	prenatal vs postnatal	human
1529.26	0.083631	0.19319	0.432896	0.66509	0.736246	DHTKD1	0.69071	postnatal	TCA	Heart	prenatal vs postnatal	human
23534.9	1.75618	0.251404	6.98549	2.8386392066682e-12	2.93829710758332e-11	IDH2	9.36750938200506e-12	postnatal	TCA	Heart	prenatal vs postnatal	human
839.182	-2.78977	0.501353	-5.56447	2.62945324673247e-08	1.60566035595321e-07	OGDHL	5.10423277306892e-08	prenatal	TCA	Heart	prenatal vs postnatal	human
3808.09	1.28678	0.228496	5.6315	1.78643978431719e-08	1.1206350326337e-07	SDHD	3.93016752549782e-08	postnatal	TCA	Heart	prenatal vs postnatal	human
9797.31	0.612726	0.201068	3.04735	0.00230867	0.00584281	CFLAR	0.00423955	postnatal	ROS	Heart	prenatal vs postnatal	human
40.5944	-2.36019	0.431859	-5.46519	4.62407450329571e-08	2.72792546037613e-07	MPO	1.66796973154595e-07	prenatal	ROS	Heart	prenatal vs postnatal	human
62.2332	0.416454	0.326133	1.27694	0.201623	0.281939	NOS2	0.267946	postnatal	ROS	Heart	prenatal vs postnatal	human
2633.44	-0.0724811	0.127469	-0.568618	0.569616	0.652996	FYN	0.665463	prenatal	ROS	Heart	prenatal vs postnatal	human
29.5429	0.548865	0.300862	1.8243	0.068106	0.113689	ALOX5	0.0996914	postnatal	ROS	Heart	prenatal vs postnatal	human
511.165	0.292204	0.171521	1.7036	0.0884551	0.141746	CTNS	0.124083	postnatal	ROS	Heart	prenatal vs postnatal	human
1161.65	0.612376	0.268632	2.27961	0.022631	0.0442106	CYBA	0.0360299	postnatal	ROS	Heart	prenatal vs postnatal	human
11798.1	-0.334351	0.195728	-1.70824	0.0875913	0.140609	ATP2B4	0.124083	prenatal	ROS	Heart	prenatal vs postnatal	human
271.548	1.01677	0.177238	5.73676	9.65041490044265e-09	6.26010603070902e-08	SPHK2	3.74881501901811e-08	postnatal	ROS	Heart	prenatal vs postnatal	human
669.596	0.421449	0.163446	2.57852	0.00992251	0.0214483	HDAC4	0.0167029	postnatal	ROS	Heart	prenatal vs postnatal	human
3209.44	1.95146	0.389787	5.00646	5.54388521378287e-07	2.78584708814204e-06	MAOB	1.8664413553069e-06	postnatal	ROS	Heart	prenatal vs postnatal	human
1085.19	-1.033	0.29155	-3.54312	0.000395424	0.0011802	RORA	0.000887507	prenatal	ROS	Heart	prenatal vs postnatal	human
505.167	-1.05545	0.220419	-4.78837	1.68145411665588e-06	7.82774459130399e-06	RAB27A	5.14626866006799e-06	prenatal	ROS	Heart	prenatal vs postnatal	human
309.557	-0.276207	0.770726	-0.358373	0.720064	0.782526	PTGS2	0.757567	prenatal	ROS	Heart	prenatal vs postnatal	human
475.472	-1.12177	0.285821	-3.92473	8.68257193226784e-05	0.000296524	EDN1	0.000219235	prenatal	ROS	Heart	prenatal vs postnatal	human
4737.84	0.490502	0.145513	3.37084	0.000749393	0.00211766	DNM2	0.00154467	postnatal	ROS	Heart	prenatal vs postnatal	human
32219.5	0.359029	0.181074	1.98278	0.0473922	0.0834197	HSP90AA1	0.071442	postnatal	ROS	Heart	prenatal vs postnatal	human
111.737	-1.04393	0.308597	-3.38281	0.000717482	0.00203575	NOX4	0.0015097	prenatal	ROS	Heart	prenatal vs postnatal	human
4783.53	-0.85016	0.138728	-6.12823	8.88625622939358e-10	6.6841529720925e-09	KHSRP	4.48755939584376e-09	prenatal	ROS	Heart	prenatal vs postnatal	human
5862.5	-0.258256	0.201649	-1.28072	0.200291	0.280462	DYNLL1	0.267946	prenatal	ROS	Heart	prenatal vs postnatal	human
10.3035	-2.04758	0.77652	-2.63687	0.00836745	0.0184381	NOS1	0.0145709	prenatal	ROS	Heart	prenatal vs postnatal	human
657.504	1.31464	0.383701	3.4262	0.000612089	0.00176005	ICAM1	0.00131534	postnatal	ROS	Heart	prenatal vs postnatal	human
40335.1	0.698927	0.18356	3.80763	0.000140304	0.000459064	HSP90AB1	0.00032955	postnatal	ROS	Heart	prenatal vs postnatal	human
1302.42	-0.650548	0.332554	-1.95622	0.0504394	0.0880219	JAK2	0.0749174	prenatal	ROS	Heart	prenatal vs postnatal	human
9685.44	1.07272	0.161008	6.66253	2.69149021488874e-11	2.46559895092354e-10	CYB5R3	1.43073953528296e-10	postnatal	ROS	Heart	prenatal vs postnatal	human
1761.54	2.18373	0.369252	5.91392	3.34052860057423e-09	2.31577876538366e-08	TSPO	1.4669277767739e-08	postnatal	ROS	Heart	prenatal vs postnatal	human
3.26464	-0.373547	1.29196	-0.289133	0.77248	0.825645	PAGE4	0.804334	prenatal	ROS	Heart	prenatal vs postnatal	human
587.551	0.467313	0.205299	2.27625	0.0228308	0.0445449	ABCD1	0.0360299	postnatal	ROS	Heart	prenatal vs postnatal	human
449.315	-0.0345279	0.176481	-0.195647	0.844887	0.884519	GLA	0.861955	prenatal	ROS	Heart	prenatal vs postnatal	human
2261.26	0.119658	0.0990022	1.20864	0.2268	0.310658	CYB5B	0.295985	postnatal	ROS	Heart	prenatal vs postnatal	human
11174.6	0.683047	0.376246	1.81542	0.0694587	0.115562	CAV1	0.100219	postnatal	ROS	Heart	prenatal vs postnatal	human
3429.74	0.0936402	0.179899	0.520516	0.602704	0.681738	GBF1	0.683968	postnatal	ROS	Heart	prenatal vs postnatal	human
8.12713	0.658963	0.547303	1.20402	0.228582	0.312775	UCP1	0.295985	postnatal	ROS	Heart	prenatal vs postnatal	human
2640.07	-0.0627327	0.137607	-0.455883	0.648474	0.72184	CLCN3	0.711912	prenatal	ROS	Heart	prenatal vs postnatal	human
3.04124	5.30443	1.31018	4.04862	5.15205439282511e-05	0.000183634	IFNG	0.000133425	postnatal	ROS	Heart	prenatal vs postnatal	human
12032.4	1.43372	0.247329	5.7968	6.75934791821941e-09	4.49608839016973e-08	SOD2	2.844558915584e-08	postnatal	ROS	Heart	prenatal vs postnatal	human
1.33468	0.538231	1.23558	0.435609	0.66312	0.734465	AGXT2	0.720163	postnatal	ROS	Heart	prenatal vs postnatal	human
1652.02	-1.32571	0.150223	-8.82497	1.09486225479721e-18	2.34650097671165e-17	PIKFYVE	1.84301812890863e-17	prenatal	ROS	Heart	prenatal vs postnatal	human
483.432	2.61075	0.222853	11.7151	1.06659432062165e-31	7.83561666596691e-30	SPR	1.07726026382787e-29	postnatal	ROS	Heart	prenatal vs postnatal	human
6309.64	1.25578	0.118624	10.5863	3.45140293646494e-26	1.62708116685719e-24	PARK7	1.1619723219432e-24	postnatal	ROS	Heart	prenatal vs postnatal	human
1867.49	-0.759106	0.179946	-4.21852	2.45909453317666e-05	9.33347777252054e-05	PKD2	7.09624422430979e-05	prenatal	ROS	Heart	prenatal vs postnatal	human
711.871	-1.30917	0.1905	-6.87226	6.31909994228613e-12	6.25453728194765e-11	WDR35	4.90945457054538e-11	prenatal	ROS	Heart	prenatal vs postnatal	human
4145.69	1.39588	0.288439	4.83945	1.30200253696784e-06	6.18538909559701e-06	CLU	4.10944550730475e-06	postnatal	ROS	Heart	prenatal vs postnatal	human
492.942	-0.185493	0.396818	-0.467452	0.640176	0.714558	PTK2B	0.710525	prenatal	ROS	Heart	prenatal vs postnatal	human
579.004	0.288627	0.197618	1.46053	0.144145	0.213317	ZNF205	0.199433	postnatal	ROS	Heart	prenatal vs postnatal	human
1495.7	-0.130573	0.330335	-0.395273	0.692641	0.759572	PTGIS	0.744221	prenatal	ROS	Heart	prenatal vs postnatal	human
10.9043	0.350202	0.43473	0.805562	0.420495	0.513428	IL1B	0.524321	postnatal	ROS	Heart	prenatal vs postnatal	human
4271.98	1.28493	0.163182	7.87417	3.43006098094352e-15	5.1309288893107e-14	TRAP1	3.84929065639217e-14	postnatal	ROS	Heart	prenatal vs postnatal	human
2737.55	2.33317	0.306049	7.62352	2.46843267895663e-14	3.33755823417005e-13	KLF2	2.4931170057462e-13	postnatal	ROS	Heart	prenatal vs postnatal	human
203.695	1.99413	0.204509	9.75082	1.82979409361061e-22	5.86576538105695e-21	TICAM1	4.62023008636679e-21	postnatal	ROS	Heart	prenatal vs postnatal	human
1873.54	1.3834	0.338483	4.08705	4.36898212224039e-05	0.000157958	ASS1	0.000116123	postnatal	ROS	Heart	prenatal vs postnatal	human
453.469	2.03326	0.297988	6.82328	8.89847577843424e-12	8.64577475798128e-11	RGN	5.99164035747905e-11	postnatal	ROS	Heart	prenatal vs postnatal	human
131.731	0.995581	0.303725	3.27791	0.0010458	0.00286376	GCH1	0.00203126	postnatal	ROS	Heart	prenatal vs postnatal	human
2534.76	-0.56232	0.171347	-3.28176	0.00103163	0.00282878	ROCK2	0.00203126	prenatal	ROS	Heart	prenatal vs postnatal	human
397.412	-0.114872	0.203922	-0.563315	0.573221	0.656247	P2RX4	0.665463	prenatal	ROS	Heart	prenatal vs postnatal	human
18018.4	3.24279	0.46134	7.02908	2.07906864874595e-12	2.18368262721938e-11	CD36	1.74988277936117e-11	postnatal	ROS	Heart	prenatal vs postnatal	human
6923.5	0.379366	0.0993984	3.81662	0.000135293	0.000444482	RAC1	0.00032955	postnatal	ROS	Heart	prenatal vs postnatal	human
3.41173	1.78158	0.67101	2.65507	0.00792911	0.0175953	IL10	0.0140498	postnatal	ROS	Heart	prenatal vs postnatal	human
1655.79	3.16503	0.387605	8.16561	3.19809485581646e-16	5.29949966489836e-15	KLF4	4.61439400624946e-15	postnatal	ROS	Heart	prenatal vs postnatal	human
465.972	1.04479	0.274182	3.81056	0.000138652	0.000454277	TLR4	0.00032955	postnatal	ROS	Heart	prenatal vs postnatal	human
55.0151	0.235253	0.48797	0.482105	0.629731	0.70549	DUOX1	0.706698	postnatal	ROS	Heart	prenatal vs postnatal	human
162.484	0.134825	0.219848	0.613264	0.539702	0.625971	GCHFR	0.641293	postnatal	ROS	Heart	prenatal vs postnatal	human
477.116	1.70412	0.494155	3.44855	0.000563609	0.00163251	CYP1B1	0.00123749	postnatal	ROS	Heart	prenatal vs postnatal	human
12.6462	0.0129251	0.566726	0.0228067	0.981804	0.986954	DUOXA1	0.981804	postnatal	ROS	Heart	prenatal vs postnatal	human
155.018	-6.58452	0.961839	-6.84576	7.60703151303811e-12	7.45675175779537e-11	DUOXA2	5.48792987726321e-11	prenatal	ROS	Heart	prenatal vs postnatal	human
615.934	-4.30007	0.748422	-5.74552	9.16385201096380e-09	5.96886730520029e-08	DUOX2	3.70219621242937e-08	prenatal	ROS	Heart	prenatal vs postnatal	human
1096.59	11.3624	1.39807	8.12723	4.39213587717073e-16	7.16587400021803e-15	CYP1A1	5.54507154492804e-15	postnatal	ROS	Heart	prenatal vs postnatal	human
7362.88	1.686	0.149902	11.2474	2.38648487120963e-29	1.42794944318735e-27	SOD1	1.20517485996086e-27	postnatal	ROS	Heart	prenatal vs postnatal	human
6038.59	0.418139	0.116621	3.58547	0.000336473	0.00101723	AKT1	0.000772358	postnatal	ROS	Heart	prenatal vs postnatal	human
804.958	-2.25405	0.297346	-7.58057	3.44031540733361e-14	4.55613528181031e-13	SNCA	3.15883505582449e-13	prenatal	ROS	Heart	prenatal vs postnatal	human
1086.54	-1.26695	0.25241	-5.01939	5.18354005108324e-07	2.61920297537253e-06	DDAH1	1.80530187986002e-06	prenatal	ROS	Heart	prenatal vs postnatal	human
2.15902	0.592005	0.806785	0.733783	0.463081	0.555223	MPV17L	0.564216	postnatal	ROS	Heart	prenatal vs postnatal	human
237.524	2.17301	0.325168	6.68274	2.34518065899073e-11	2.16334122386912e-10	ITGB2	1.31590692532257e-10	postnatal	ROS	Heart	prenatal vs postnatal	human
1983.37	0.905529	0.160715	5.63436	1.7570982345043e-08	1.10353780593529e-07	ACOX1	6.57284895129386e-08	postnatal	ROS	Heart	prenatal vs postnatal	human
23.1671	-3.35192	0.790438	-4.24059	2.22937457895976e-05	8.52150158834351e-05	INAVA	6.62255389632163e-05	prenatal	ROS	Heart	prenatal vs postnatal	human
143.569	0.355154	0.434539	0.817313	0.41375	0.507007	PTX3	0.522359	postnatal	ROS	Heart	prenatal vs postnatal	human
139.722	1.31493	0.317394	4.1429	3.42947752996922e-05	0.000126551	ZC3H12A	9.6215897368581e-05	postnatal	ROS	Heart	prenatal vs postnatal	human
909.242	0.152552	0.286753	0.532	0.594726	0.674879	NOS3	0.682583	postnatal	ROS	Heart	prenatal vs postnatal	human
25.0778	-0.179197	0.494738	-0.362207	0.717198	0.78018	SLC18A2	0.757567	prenatal	ROS	Heart	prenatal vs postnatal	human
2243.51	-0.966979	0.142975	-6.76327	1.34910113528424e-11	1.28298014113133e-10	SMAD3	8.01524792139463e-11	prenatal	ROS	Heart	prenatal vs postnatal	human
67.2131	1.66022	0.57428	2.89096	0.00384073	0.00921238	CX3CR1	0.00692703	postnatal	ROS	Heart	prenatal vs postnatal	human
3768.8	0.312478	0.219133	1.42597	0.153876	0.225307	INSR	0.21002	postnatal	ROS	Heart	prenatal vs postnatal	human
311.808	0.981833	0.378881	2.5914	0.00955866	0.0207313	SLC25A33	0.0163631	postnatal	ROS	Heart	prenatal vs postnatal	human
35.0182	0.889225	0.369772	2.4048	0.0161815	0.0330053	CLEC7A	0.0263601	postnatal	ROS	Heart	prenatal vs postnatal	human
21.2407	3.46809	0.700693	4.94951	7.43997473091922e-07	3.66961976330885e-06	ABCD2	2.42399176717046e-06	postnatal	ROS	Heart	prenatal vs postnatal	human
7656.6	1.16027	0.282825	4.10244	4.08808215795747e-05	0.000148656	CD34	0.000111594	postnatal	ROS	Heart	prenatal vs postnatal	human
22.2179	-0.0889208	0.366099	-0.242887	0.808093	0.854831	TLR6	0.83283	prenatal	ROS	Heart	prenatal vs postnatal	human
5.91159	2.22573	0.667133	3.33627	0.000849114	0.00236983	GRIN1	0.00171521	postnatal	ROS	Heart	prenatal vs postnatal	human
130.671	-0.503892	0.499396	-1.009	0.312974	0.404576	AGTR2	0.400131	prenatal	ROS	Heart	prenatal vs postnatal	human
265.351	1.82521	0.302226	6.03923	1.54853382975816e-09	1.1241854020207e-08	NQO1	7.10917803661699e-09	postnatal	ROS	Heart	prenatal vs postnatal	human
50.843	1.0202	0.413267	2.46863	0.0135631	0.0282505	ADGRB1	0.0224569	postnatal	ROS	Heart	prenatal vs postnatal	human
2707.7	0.667073	0.309052	2.15845	0.0308932	0.057995	PPARA	0.0480034	postnatal	ROS	Heart	prenatal vs postnatal	human
204.797	-3.3207	1.04698	-3.17169	0.00151556	0.00400419	SLC30A10	0.00288814	prenatal	ROS	Heart	prenatal vs postnatal	human
2937.04	-0.411224	0.192711	-2.13389	0.0328521	0.061173	CD47	0.0502737	prenatal	ROS	Heart	prenatal vs postnatal	human
2978.08	-1.30251	0.141689	-9.19279	3.82799266336854e-20	9.56905682505488e-19	SIRPA	7.73254518000446e-19	prenatal	ROS	Heart	prenatal vs postnatal	human
1057.71	-1.94764	0.287939	-6.76407	1.34170870584298e-11	1.27686830311008e-10	SLC5A3	8.01524792139463e-11	prenatal	ROS	Heart	prenatal vs postnatal	human
2478.61	0.0212019	0.202639	0.104629	0.916671	0.93944	MTOR	0.925837	postnatal	ROS	Heart	prenatal vs postnatal	human
64.3654	-1.07377	0.346676	-3.09733	0.00195269	0.00502438	NOS1AP	0.00365226	prenatal	ROS	Heart	prenatal vs postnatal	human
1318.91	0.111708	0.157124	0.710953	0.477113	0.568286	DDAH2	0.573672	postnatal	ROS	Heart	prenatal vs postnatal	human
6654.06	0.572225	0.780844	0.732829	0.463663	0.555786	HBB	0.564216	postnatal	ROS	Heart	prenatal vs postnatal	human
643.086	1.06121	0.174025	6.09801	1.07393825073233e-09	7.97597442210554e-09	COA8	5.16513158685547e-09	postnatal	ROS	Heart	prenatal vs postnatal	human
931.516	0.520723	0.112687	4.62099	3.81914337674259e-06	1.67949592425526e-05	NDUFAF7	6.47593876925917e-06	postnatal	Assembly factors	Heart	prenatal vs postnatal	human
1232.49	1.48767	0.245616	6.0569	1.38766773084738e-09	1.01296297205964e-08	COX10	2.84837060542357e-09	postnatal	Assembly factors	Heart	prenatal vs postnatal	human
1438.99	0.0460666	0.149446	0.308249	0.757893	0.813771	COX15	0.777837	postnatal	Assembly factors	Heart	prenatal vs postnatal	human
1310.94	1.02269	0.15504	6.59633	4.21466381533546e-11	3.7759218809003e-10	BCS1L	9.66893463518134e-11	postnatal	Assembly factors	Heart	prenatal vs postnatal	human
3020.99	0.994092	0.197455	5.03453	4.79018901912467e-07	2.43299652369484e-06	UQCC1	8.491698715721e-07	postnatal	Assembly factors	Heart	prenatal vs postnatal	human
1294.2	0.723896	0.200485	3.61072	0.000305346	0.000930678	NDUFAF5	0.00047634	postnatal	Assembly factors	Heart	prenatal vs postnatal	human
2229.68	0.405128	0.146242	2.77026	0.00560114	0.0128946	COA1	0.00795601	postnatal	Assembly factors	Heart	prenatal vs postnatal	human
1812.98	0.347141	0.139061	2.49632	0.012549	0.0263923	FOXRED1	0.0157874	postnatal	Assembly factors	Heart	prenatal vs postnatal	human
3234.25	1.72032	0.167996	10.2402	1.30956689985911e-24	5.18474787433739e-23	TIMMDC1	1.70243696981684e-23	postnatal	Assembly factors	Heart	prenatal vs postnatal	human
4354.16	1.57426	0.18812	8.36838	5.84169357581385e-17	1.05170367596698e-15	ATPAF1	1.75250807274415e-16	postnatal	Assembly factors	Heart	prenatal vs postnatal	human
1440.94	1.32118	0.155907	8.47417	2.36768915042395e-17	4.41595733154176e-16	NDUFAF4	7.69498973887784e-17	postnatal	Assembly factors	Heart	prenatal vs postnatal	human
3576.58	2.05409	0.214896	9.55855	1.19417658260148e-21	3.50915423111792e-20	ECSIT	9.31457734429153e-21	postnatal	Assembly factors	Heart	prenatal vs postnatal	human
1441.59	0.382324	0.138329	2.76387	0.00571201	0.0131202	SCO1	0.00795601	postnatal	Assembly factors	Heart	prenatal vs postnatal	human
2986.63	1.4371	0.192973	7.44716	9.53677095760308e-14	1.19932944134916e-12	UQCC2	2.32458792091575e-13	postnatal	Assembly factors	Heart	prenatal vs postnatal	human
1061.96	1.85864	0.216935	8.5677	1.0556943830522e-17	2.03054177080592e-16	NDUFAF1	4.11720809390356e-17	postnatal	Assembly factors	Heart	prenatal vs postnatal	human
1930.34	1.92248	0.208659	9.21346	3.15764359956869e-20	7.99140672514767e-19	COX17	1.94044162171888e-19	postnatal	Assembly factors	Heart	prenatal vs postnatal	human
786.575	1.99901	0.176086	11.3525	7.21065928909311e-30	4.44522858318521e-28	SURF1	1.40607856137316e-28	postnatal	Assembly factors	Heart	prenatal vs postnatal	human
799.101	-0.0856336	0.194312	-0.440702	0.659429	0.73151	NUBPL	0.695074	prenatal	Assembly factors	Heart	prenatal vs postnatal	human
592.317	1.63612	0.215821	7.5809	3.4316211001019e-14	4.54689795763502e-13	SDHAF4	8.92221486026494e-14	postnatal	Assembly factors	Heart	prenatal vs postnatal	human
629.597	0.865198	0.19137	4.52107	6.15271184206236e-06	2.60949284024094e-05	NDUFAF6	9.99815674335133e-06	postnatal	Assembly factors	Heart	prenatal vs postnatal	human
626.488	0.266591	0.190297	1.40092	0.161239	0.234018	COA7	0.18495	postnatal	Assembly factors	Heart	prenatal vs postnatal	human
752.101	0.126603	0.141792	0.892879	0.371922	0.465708	COX18	0.411553	postnatal	Assembly factors	Heart	prenatal vs postnatal	human
628.529	1.59983	0.173839	9.20294	3.48284393641849e-20	8.74746187905602e-19	NDUFAF2	1.94044162171888e-19	postnatal	Assembly factors	Heart	prenatal vs postnatal	human
1362.74	0.399033	0.158757	2.51348	0.0119545	0.0252686	COX11	0.0157874	postnatal	Assembly factors	Heart	prenatal vs postnatal	human
241.438	1.16995	0.131788	8.87749	6.83859056359083e-19	1.49347815553498e-17	SDHAF2	3.33381289975053e-18	postnatal	Assembly factors	Heart	prenatal vs postnatal	human
641.734	0.472618	0.199339	2.37092	0.0177437	0.0357402	COA6	0.0216252	postnatal	Assembly factors	Heart	prenatal vs postnatal	human
1758.04	0.1761	0.200548	0.87809	0.379895	0.473606	TMEM126B	0.411553	postnatal	Assembly factors	Heart	prenatal vs postnatal	human
817.329	1.20892	0.140624	8.59687	8.19202407999649e-18	1.59892591028537e-16	ATPAF2	3.54987710133181e-17	postnatal	Assembly factors	Heart	prenatal vs postnatal	human
1885.34	0.895612	0.152879	5.85831	4.67598897565623e-09	3.18562288612005e-08	ACAD9	8.68397952621871e-09	postnatal	Assembly factors	Heart	prenatal vs postnatal	human
2701.68	1.73388	0.218996	7.91741	2.42512712717761e-15	3.68605385818772e-14	NDUFAF3	6.75571128285192e-15	postnatal	Assembly factors	Heart	prenatal vs postnatal	human
1809.73	2.66829	0.220316	12.1112	9.21093811415419e-34	7.61255250953237e-32	COX14	3.59226586452013e-32	postnatal	Assembly factors	Heart	prenatal vs postnatal	human
1200.42	0.92022	0.146968	6.26137	3.81600520002184e-10	3.01349326739258e-09	COA4	8.26801126671398e-10	postnatal	Assembly factors	Heart	prenatal vs postnatal	human
1375.15	0.339479	0.163339	2.07837	0.0376751	0.0687974	COA5	0.0445251	postnatal	Assembly factors	Heart	prenatal vs postnatal	human
1634.05	1.40905	0.164949	8.54235	1.31524931672793e-17	2.50608059650603e-16	COA3	4.66315666839904e-17	postnatal	Assembly factors	Heart	prenatal vs postnatal	human
474.541	0.65657	0.207076	3.17067	0.00152089	0.00401748	SDHAF3	0.00228134	postnatal	Assembly factors	Heart	prenatal vs postnatal	human
2979.23	0.529724	0.211393	2.50588	0.0122148	0.0257612	COX20	0.0157874	postnatal	Assembly factors	Heart	prenatal vs postnatal	human
474.448	1.14518	0.1907	6.00516	1.91137836714911e-09	1.37103942706787e-08	UQCC3	3.72718781594076e-09	postnatal	Assembly factors	Heart	prenatal vs postnatal	human
368.945	1.86743	0.190871	9.78375	1.32214037043042e-22	4.30094051374827e-21	SDHAF1	1.28908686116966e-21	postnatal	Assembly factors	Heart	prenatal vs postnatal	human
476.23	-0.0191942	0.177761	-0.107977	0.914014	0.937626	COX19	0.914014	prenatal	Assembly factors	Heart	prenatal vs postnatal	human
6524.81	2.15398	0.228942	9.4084	5.03732659700769e-21	1.38917806580878e-19	NDUFAB1	1.25933164925192e-20	postnatal	Structural factors	Heart	prenatal vs postnatal	human
19001.2	2.25571	0.222381	10.1434	3.54464221787422e-24	1.35665922917684e-22	UQCRC1	1.4400109010114e-23	postnatal	Structural factors	Heart	prenatal vs postnatal	human
3893.78	1.81846	0.317997	5.7185	1.07468385521994e-08	6.94578785899356e-08	NDUFS1	1.31800850168483e-08	postnatal	Structural factors	Heart	prenatal vs postnatal	human
8007.56	2.36801	0.222204	10.6569	1.61867637965292e-26	7.89836424588207e-25	NDUFB4	1.315174558468e-25	postnatal	Structural factors	Heart	prenatal vs postnatal	human
18587.8	1.77489	0.273663	6.48568	8.8333880917713e-11	7.57020786983394e-10	SDHA	1.12582397248066e-10	postnatal	Structural factors	Heart	prenatal vs postnatal	human
6378.73	2.14845	0.197657	10.8695	1.61008435594862e-27	8.31677753159634e-26	NDUFB2	1.74425805227768e-26	postnatal	Structural factors	Heart	prenatal vs postnatal	human
6435.56	3.01207	0.244858	12.3013	8.91431431013723e-35	7.85856235200665e-33	NDUFB7	2.8971521507946e-33	postnatal	Structural factors	Heart	prenatal vs postnatal	human
3657.35	1.88206	0.194808	9.66113	4.40989944965434e-22	1.36248377038561e-20	NDUFC1	1.30292483739787e-21	postnatal	Structural factors	Heart	prenatal vs postnatal	human
5343.92	2.37734	0.207236	11.4716	1.83146666853978e-30	1.21395486172611e-28	NDUFS8	2.97613333637715e-29	postnatal	Structural factors	Heart	prenatal vs postnatal	human
1865.82	-0.185472	0.287138	-0.645935	0.518321	0.606416	COX6A1	0.52642	prenatal	Structural factors	Heart	prenatal vs postnatal	human
6736.02	1.83021	0.201031	9.10413	8.69581894975435e-20	2.09261441095681e-18	COX7A2	1.8233168765614e-19	postnatal	Structural factors	Heart	prenatal vs postnatal	human
6802.74	2.03804	0.237479	8.58198	9.32501212074919e-18	1.80672963778354e-16	NDUFS7	1.47835558011877e-17	postnatal	Structural factors	Heart	prenatal vs postnatal	human
6592.42	2.4702	0.232128	10.6415	1.91001663568735e-26	9.25168680659768e-25	SDHB	1.37945645910753e-25	postnatal	Structural factors	Heart	prenatal vs postnatal	human
3826.33	2.32242	0.229201	10.1327	3.95603915608144e-24	1.50757013776493e-22	NDUFB3	1.51260320673702e-23	postnatal	Structural factors	Heart	prenatal vs postnatal	human
5313.44	1.89124	0.196382	9.63043	5.94826780712388e-22	1.80199127943878e-20	NDUFA8	1.6810322063611e-21	postnatal	Structural factors	Heart	prenatal vs postnatal	human
10068.4	2.36067	0.250276	9.43226	4.01346447979901e-21	1.11262154189984e-19	NDUFA1	1.04350076474774e-20	postnatal	Structural factors	Heart	prenatal vs postnatal	human
15801.3	2.17846	0.208307	10.458	1.34717532163887e-25	5.85036875720576e-24	COX6B1	7.2971996588772e-25	postnatal	Structural factors	Heart	prenatal vs postnatal	human
18353.6	1.63421	0.183893	8.88676	6.29187429286893e-19	1.37863462654105e-17	COX7C	1.16849094010423e-18	postnatal	Structural factors	Heart	prenatal vs postnatal	human
2071.22	1.90425	0.20328	9.36764	7.41722308111056e-21	2.00986986502183e-19	UQCR11	1.78562777878588e-20	postnatal	Structural factors	Heart	prenatal vs postnatal	human
5640.68	0.72895	0.222367	3.27814	0.00104492	0.00286165	NDUFA5	0.00111344	postnatal	Structural factors	Heart	prenatal vs postnatal	human
8022.13	1.16057	0.169644	6.84122	7.8521149049329e-12	7.68559892267803e-11	NDUFA10	1.02077493764128e-11	postnatal	Structural factors	Heart	prenatal vs postnatal	human
288.681	2.28449	0.433275	5.2726	1.34506303731012e-07	7.42338942982906e-07	COX4I2	1.56123388259211e-07	postnatal	Structural factors	Heart	prenatal vs postnatal	human
31029.8	2.32936	0.202629	11.4957	1.3861819905791e-30	9.25766543051654e-29	COX4I1	2.97613333637715e-29	postnatal	Structural factors	Heart	prenatal vs postnatal	human
15784.8	2.17565	0.221672	9.81474	9.72883598093176e-23	3.20421575576217e-21	COX7B	3.16187169380282e-22	postnatal	Structural factors	Heart	prenatal vs postnatal	human
3003.45	1.97303	0.217021	9.09145	9.77302865920522e-20	2.3390704882353e-18	NDUFA2	1.98514644640106e-19	postnatal	Structural factors	Heart	prenatal vs postnatal	human
17195.2	2.49809	0.289136	8.63985	5.62848394858611e-18	1.1225981522493e-16	COX5B	9.14628641645243e-18	postnatal	Structural factors	Heart	prenatal vs postnatal	human
6253.68	1.28269	0.201742	6.35804	2.04338296798097e-10	1.67518131910083e-09	NDUFB5	2.55422870997622e-10	postnatal	Structural factors	Heart	prenatal vs postnatal	human
1481.38	1.40964	0.182281	7.73335	1.04750351139878e-14	1.48304739646486e-13	NDUFA9	1.51306062757601e-14	postnatal	Structural factors	Heart	prenatal vs postnatal	human
16308.6	1.64233	0.21738	7.55509	4.18556942474889e-14	5.49358583505379e-13	UQCRC2	5.7885534597591e-14	postnatal	Structural factors	Heart	prenatal vs postnatal	human
9503.06	2.92756	0.231571	12.6422	1.23620919472507e-36	1.18456610771355e-34	NDUFB10	8.03535976571298e-35	postnatal	Structural factors	Heart	prenatal vs postnatal	human
3059.85	0.867269	0.193928	4.47212	7.74472471021651e-06	3.23016455466166e-05	SDHC	8.53232383328938e-06	postnatal	Structural factors	Heart	prenatal vs postnatal	human
5268.36	1.88962	0.262583	7.19628	6.18791371408743e-13	7.00864042811436e-12	NDUFS6	8.37946648782673e-13	postnatal	Structural factors	Heart	prenatal vs postnatal	human
4578.01	1.87699	0.205425	9.13714	6.41281211573221e-20	1.56891435730592e-18	NDUFB11	1.38944262507531e-19	postnatal	Structural factors	Heart	prenatal vs postnatal	human
9847.08	2.5022	0.230993	10.8324	2.41849389958802e-27	1.23957186361249e-25	NDUFB9	2.24574433533173e-26	postnatal	Structural factors	Heart	prenatal vs postnatal	human
720.684	0.497181	0.203974	2.43747	0.0147903	0.0304926	NDUFC2	0.015506	postnatal	Structural factors	Heart	prenatal vs postnatal	human
24128.4	2.35247	0.22351	10.5251	6.61735869837706e-26	2.971295169711e-24	UQCRB	4.22752952882222e-25	postnatal	Structural factors	Heart	prenatal vs postnatal	human
16488.5	4.97171	0.439892	11.3021	1.28095575300917e-29	7.78791650570883e-28	COX6A2	1.66524247891192e-28	postnatal	Structural factors	Heart	prenatal vs postnatal	human
10354.9	1.59205	0.204135	7.79899	6.24033766491421e-15	9.1181331615462e-14	NDUFS2	9.21868064135054e-15	postnatal	Structural factors	Heart	prenatal vs postnatal	human
3419.11	1.74483	0.176711	9.87391	5.40175473511805e-23	1.83154112153419e-21	NDUFV3	1.95063365434819e-22	postnatal	Structural factors	Heart	prenatal vs postnatal	human
12.6051	-5.4317	1.07379	-5.05842	4.22740727766308e-07	2.16587059806965e-06	COX6B2	4.82072759733509e-07	prenatal	Structural factors	Heart	prenatal vs postnatal	human
15232.2	4.23216	0.409477	10.3355	4.8682218618694e-25	2.02436892422736e-23	COX7A1	2.4341109309347e-24	postnatal	Structural factors	Heart	prenatal vs postnatal	human
2716.23	1.67881	0.192048	8.74162	2.29801298457916e-18	4.73698748270967e-17	NDUFS4	4.0370498377742e-18	postnatal	Structural factors	Heart	prenatal vs postnatal	human
7951.5	2.30575	0.238355	9.6736	3.90409673245057e-22	1.21615602218045e-20	UQCRQ	1.20841089337756e-21	postnatal	Structural factors	Heart	prenatal vs postnatal	human
11958.2	1.63695	0.234316	6.98608	2.82666138010323e-12	2.92704438212961e-11	COX6C	3.74965285115735e-12	postnatal	Structural factors	Heart	prenatal vs postnatal	human
2403.26	1.40786	0.174839	8.05235	8.12225649101575e-16	1.2987262238083e-14	NDUFB6	1.22778295794424e-15	postnatal	Structural factors	Heart	prenatal vs postnatal	human
1554.83	1.22396	0.223751	5.47019	4.49543739901119e-08	2.65856066394564e-07	NDUFB8	5.31278965337687e-08	postnatal	Structural factors	Heart	prenatal vs postnatal	human
14013.6	1.75163	0.202384	8.65498	4.93002480880867e-18	9.90010372957957e-17	NDUFV1	8.21670801468112e-18	postnatal	Structural factors	Heart	prenatal vs postnatal	human
11116.8	1.68068	0.200669	8.3754	5.50347070371386e-17	9.93517335843825e-16	NDUFS5	8.51727608908097e-17	postnatal	Structural factors	Heart	prenatal vs postnatal	human
6912.82	2.03645	0.233503	8.72129	2.75049319984099e-18	5.63893749272828e-17	UQCRFS1	4.70479099972802e-18	postnatal	Structural factors	Heart	prenatal vs postnatal	human
3092.26	2.71768	0.293484	9.26007	2.0429399565623e-20	5.28148905485858e-19	NDUFA3	4.74253918487678e-20	postnatal	Structural factors	Heart	prenatal vs postnatal	human
11358.6	1.43439	0.185831	7.71878	1.17449553418191e-14	1.65047201873056e-13	UQCRH	1.65961325482227e-14	postnatal	Structural factors	Heart	prenatal vs postnatal	human
1604.08	1.37439	0.292593	4.69727	2.6366327801377e-06	1.19259495700875e-05	NDUFA11	2.9548470811888e-06	postnatal	Structural factors	Heart	prenatal vs postnatal	human
8842.45	2.07667	0.211409	9.82298	8.9653278790502e-23	2.96382533021551e-21	COX8A	3.06708585335928e-22	postnatal	Structural factors	Heart	prenatal vs postnatal	human
41.7536	-1.6866	0.428249	-3.93836	8.20419681153235e-05	0.000281344	NDUFV2	8.88787987916005e-05	prenatal	Structural factors	Heart	prenatal vs postnatal	human
15244.3	2.22167	0.21733	10.2225	1.57154170645173e-24	6.18490528430489e-23	COX5A	6.81001406129082e-24	postnatal	Structural factors	Heart	prenatal vs postnatal	human
11989.6	2.5612	0.243512	10.5178	7.15428074108376e-26	3.20151036818007e-24	CYC1	4.22752952882222e-25	postnatal	Structural factors	Heart	prenatal vs postnatal	human
4698.43	1.88496	0.213469	8.83011	1.0456847978122e-18	2.24970458288045e-17	NDUFB1	1.88804199604981e-18	postnatal	Structural factors	Heart	prenatal vs postnatal	human
6659.49	1.96191	0.213935	9.17061	4.70343934073122e-20	1.16362825298708e-18	UQCR10	1.05421916257769e-19	postnatal	Structural factors	Heart	prenatal vs postnatal	human
4348.75	1.6768	0.17654	9.49817	2.13613802374324e-21	6.11411713354301e-20	NDUFA12	5.7853738143046e-21	postnatal	Structural factors	Heart	prenatal vs postnatal	human
2974.83	1.87657	0.207584	9.04004	1.56621422863261e-19	3.65592830579406e-18	NDUFA6	3.08496742003393e-19	postnatal	Structural factors	Heart	prenatal vs postnatal	human
187.777	0.567588	0.277884	2.04253	0.0410988	0.0740624	NDUFA13	0.0424035	postnatal	Structural factors	Heart	prenatal vs postnatal	human
21039.2	2.2065	0.214402	10.2914	7.70310022714869e-25	3.10082026951905e-23	NDUFA4	3.57643939117618e-24	postnatal	Structural factors	Heart	prenatal vs postnatal	human
3808.09	1.28678	0.228496	5.6315	1.78643978431719e-08	1.1206350326337e-07	SDHD	2.15034418482625e-08	postnatal	Structural factors	Heart	prenatal vs postnatal	human
5362.73	1.80616	0.201399	8.96805	3.01805656657895e-19	6.81627173495419e-18	NDUFS3	5.76981402434212e-19	postnatal	Structural factors	Heart	prenatal vs postnatal	human
14.0187	0.196608	0.382898	0.513473	0.60762	0.68592	NDUFA7	0.60762	postnatal	Structural factors	Heart	prenatal vs postnatal	human
3021.9	-8.35833	0.617974	-13.5254	1.10783030828562e-41	1.39518038872523e-39	SLC4A1	1.21861333911419e-39	prenatal	Glycolysis	Heart	prenatal vs postnatal	human
86.5959	5.48306	0.72383	7.57506	3.58966876792758e-14	4.74917308180993e-13	MLXIPL	2.63242376314689e-13	postnatal	Glycolysis	Heart	prenatal vs postnatal	human
803.03	0.693304	0.419599	1.6523	0.098473	0.155056	IGF1	0.132098	postnatal	Glycolysis	Heart	prenatal vs postnatal	human
1835.94	-0.775909	0.147457	-5.26192	1.42560197612711e-07	7.83843980512132e-07	NUP160	4.48046335354233e-07	prenatal	Glycolysis	Heart	prenatal vs postnatal	human
5789.7	-0.705119	0.207664	-3.39547	0.000685107	0.00195164	TPR	0.00132214	prenatal	Glycolysis	Heart	prenatal vs postnatal	human
867.581	-1.30261	0.164457	-7.92064	2.36297784253614e-15	3.60194092227973e-14	NDC1	2.04803491904335e-14	prenatal	Glycolysis	Heart	prenatal vs postnatal	human
13427.9	-0.532966	0.251345	-2.12045	0.0339679	0.06301	PFKP	0.0494451	prenatal	Glycolysis	Heart	prenatal vs postnatal	human
42490.9	0.230968	0.203658	1.1341	0.256752	0.344459	PKM	0.297292	postnatal	Glycolysis	Heart	prenatal vs postnatal	human
669.596	0.421449	0.163446	2.57852	0.00992251	0.0214483	HDAC4	0.0170543	postnatal	Glycolysis	Heart	prenatal vs postnatal	human
1933.31	-0.0570635	0.177108	-0.322197	0.747304	0.804852	NUP133	0.775504	prenatal	Glycolysis	Heart	prenatal vs postnatal	human
26662	-1.61005	0.251169	-6.41021	1.45317088605651e-10	1.21428152996956e-09	ENO1	7.26585443028257e-10	prenatal	Glycolysis	Heart	prenatal vs postnatal	human
543.244	-0.157804	0.149509	-1.05548	0.291207	0.381375	NUP37	0.330234	prenatal	Glycolysis	Heart	prenatal vs postnatal	human
212.992	0.514468	0.302262	1.70206	0.0887446	0.142115	TIGAR	0.120607	postnatal	Glycolysis	Heart	prenatal vs postnatal	human
5995.42	1.40766	0.241569	5.82716	5.63791124005357e-09	3.79984298077718e-08	PGM1	2.21489370144962e-08	postnatal	Glycolysis	Heart	prenatal vs postnatal	human
887.472	-0.294223	0.244739	-1.20219	0.22929	0.313597	SLC4A4	0.268318	prenatal	Glycolysis	Heart	prenatal vs postnatal	human
1494.76	-0.0792383	0.134054	-0.591094	0.554457	0.639165	PSEN1	0.586445	prenatal	Glycolysis	Heart	prenatal vs postnatal	human
4.00942	0.686046	0.837294	0.819361	0.412581	0.505865	GCKR	0.453839	postnatal	Glycolysis	Heart	prenatal vs postnatal	human
1121.06	-0.492847	0.0878048	-5.61298	1.98867493182969e-08	1.23513587593557e-07	SEH1L	7.05658846778276e-08	prenatal	Glycolysis	Heart	prenatal vs postnatal	human
96.1576	0.751946	0.316662	2.37461	0.0175677	0.0354287	P2RX7	0.0272176	postnatal	Glycolysis	Heart	prenatal vs postnatal	human
1324.74	-0.852661	0.129987	-6.55957	5.39628718996316e-11	4.76036048408791e-10	NUP50	2.82662662331403e-10	prenatal	Glycolysis	Heart	prenatal vs postnatal	human
2194.06	0.358652	0.121133	2.9608	0.00306839	0.00753549	AAAS	0.00544392	postnatal	Glycolysis	Heart	prenatal vs postnatal	human
2200.43	-0.980832	0.179388	-5.46766	4.56003076890627e-08	2.69435061986738e-07	NUP188	1.47530407229321e-07	prenatal	Glycolysis	Heart	prenatal vs postnatal	human
2892.1	-0.702596	0.199663	-3.51891	0.000433326	0.00128463	EP300	0.000882702	prenatal	Glycolysis	Heart	prenatal vs postnatal	human
4514.14	-1.11482	0.212633	-5.24291	1.58062647788061e-07	8.63516390425709e-07	HIF1A	4.82969201574632e-07	prenatal	Glycolysis	Heart	prenatal vs postnatal	human
1124.21	-0.312465	0.117899	-2.65028	0.00804262	0.0178099	RAE1	0.0140427	prenatal	Glycolysis	Heart	prenatal vs postnatal	human
15868.1	0.254984	0.205124	1.24308	0.21384	0.295816	PGK1	0.257408	postnatal	Glycolysis	Heart	prenatal vs postnatal	human
28.0578	-1.25777	0.512617	-2.45362	0.0141427	0.029299	HTR2A	0.0232193	prenatal	Glycolysis	Heart	prenatal vs postnatal	human
1740.47	-0.852084	0.15247	-5.58852	2.29011823429064e-08	1.40885687234903e-07	NUP93	7.87228143037408e-08	prenatal	Glycolysis	Heart	prenatal vs postnatal	human
18433.5	0.353879	0.199444	1.77433	0.0760092	0.124649	GPI	0.105836	postnatal	Glycolysis	Heart	prenatal vs postnatal	human
1.53637	3.67118	1.47599	2.48726	0.0128731	0.0269796	GAPDHS	0.0217853	postnatal	Glycolysis	Heart	prenatal vs postnatal	human
12079.1	1.63607	0.260248	6.28657	3.24554558906799e-10	2.58850857038845e-09	OGDH	1.55221745564121e-09	postnatal	Glycolysis	Heart	prenatal vs postnatal	human
4595.53	0.0275433	0.236045	0.116687	0.907108	0.932386	PRKAG2	0.907108	postnatal	Glycolysis	Heart	prenatal vs postnatal	human
333.895	-1.23506	0.322651	-3.82786	0.00012926	0.00042604	GCK	0.000290176	prenatal	Glycolysis	Heart	prenatal vs postnatal	human
2170.32	0.270085	0.187911	1.4373	0.150632	0.221259	GIT1	0.192669	postnatal	Glycolysis	Heart	prenatal vs postnatal	human
448.749	0.50835	0.239997	2.11815	0.0341621	0.0633002	GALK1	0.0494451	postnatal	Glycolysis	Heart	prenatal vs postnatal	human
15508.1	0.758464	0.31819	2.38368	0.0171405	0.0346729	ENO3	0.026935	postnatal	Glycolysis	Heart	prenatal vs postnatal	human
1327.7	0.285402	0.137503	2.07561	0.0379298	0.0691622	NUP88	0.0541854	postnatal	Glycolysis	Heart	prenatal vs postnatal	human
9296.88	1.01667	0.413357	2.45954	0.0139115	0.0288698	ALDOC	0.0231858	postnatal	Glycolysis	Heart	prenatal vs postnatal	human
5855.99	-1.10697	0.304033	-3.64096	0.000271621	0.00083744	PPARGC1A	0.000574583	prenatal	Glycolysis	Heart	prenatal vs postnatal	human
2608.88	-0.116366	0.167781	-0.693557	0.48796	0.57834	NUP98	0.526232	prenatal	Glycolysis	Heart	prenatal vs postnatal	human
3.04124	5.30443	1.31018	4.04862	5.15205439282511e-05	0.000183634	IFNG	0.000123201	postnatal	Glycolysis	Heart	prenatal vs postnatal	human
1591.24	-0.819476	0.141776	-5.78006	7.46724672279912e-09	4.93345675937717e-08	NUP107	2.8324039293376e-08	prenatal	Glycolysis	Heart	prenatal vs postnatal	human
160337	0.862162	0.175797	4.90431	9.37585394606732e-07	4.54728056687406e-06	GAPDH	2.78741603802001e-06	postnatal	Glycolysis	Heart	prenatal vs postnatal	human
28429.4	0.637373	0.167092	3.8145	0.000136457	0.000447863	TPI1	0.000300205	postnatal	Glycolysis	Heart	prenatal vs postnatal	human
1601.3	-1.27185	0.32594	-3.90209	9.53658753758999e-05	0.000322896	ENO2	0.000223197	prenatal	Glycolysis	Heart	prenatal vs postnatal	human
1016.68	-0.918509	0.203443	-4.51481	6.33725255311233e-06	2.67947751034631e-05	NUP155	1.74274445210589e-05	prenatal	Glycolysis	Heart	prenatal vs postnatal	human
544.483	-3.77417	0.446087	-8.46062	2.65948532051834e-17	4.93235682130074e-16	PFKFB4	3.65679231571272e-16	prenatal	Glycolysis	Heart	prenatal vs postnatal	human
3.77696	5.60688	1.28614	4.35946	1.30383321355985e-05	5.21829252406436e-05	PRKAG3	3.41480127360912e-05	postnatal	Glycolysis	Heart	prenatal vs postnatal	human
377.156	-0.0911576	0.342455	-0.266189	0.790094	0.83989	ESRRB	0.804725	prenatal	Glycolysis	Heart	prenatal vs postnatal	human
1469.35	-0.671493	0.114901	-5.84412	5.09246872039727e-09	3.45157663373518e-08	NUP43	2.07470947868037e-08	prenatal	Glycolysis	Heart	prenatal vs postnatal	human
87.367	-5.56412	0.651449	-8.54115	1.32892060793619e-17	2.52848656964664e-16	MYOG	2.08830381247115e-16	prenatal	Glycolysis	Heart	prenatal vs postnatal	human
1337.39	2.64124	0.333588	7.91765	2.42040490432396e-15	3.68099186340746e-14	PFKFB2	2.04803491904335e-14	postnatal	Glycolysis	Heart	prenatal vs postnatal	human
1864.95	-0.534055	0.144802	-3.68818	0.000225861	0.000708246	NUP153	0.000487151	prenatal	Glycolysis	Heart	prenatal vs postnatal	human
1441.87	-0.380214	0.11133	-3.41521	0.00063732	0.00182574	NUP85	0.00125188	prenatal	Glycolysis	Heart	prenatal vs postnatal	human
1837.15	-0.274484	0.193513	-1.41843	0.156065	0.22786	NUP214	0.195081	prenatal	Glycolysis	Heart	prenatal vs postnatal	human
340.609	2.64158	0.282717	9.34353	9.31708916659236e-21	2.48898037564513e-19	CBFA2T3	2.5621995208129e-19	postnatal	Glycolysis	Heart	prenatal vs postnatal	human
1476.75	-2.01256	0.266033	-7.56507	3.87664909458227e-14	5.103321981305e-13	NUP210	2.66519625252531e-13	prenatal	Glycolysis	Heart	prenatal vs postnatal	human
1880.15	-0.516529	0.161505	-3.19823	0.00138274	0.00368568	PRKAA1	0.00257799	prenatal	Glycolysis	Heart	prenatal vs postnatal	human
24727.7	-1.72848	0.20599	-8.39107	4.81728176693524e-17	8.73218991707583e-16	LDHA	5.88778882625418e-16	prenatal	Glycolysis	Heart	prenatal vs postnatal	human
825.08	-0.126335	0.157422	-0.802527	0.422248	0.515092	NUP42	0.459874	prenatal	Glycolysis	Heart	prenatal vs postnatal	human
75.9287	2.7196	0.656172	4.14465	3.40339311245821e-05	0.000125694	ALDOB	8.50848278114554e-05	postnatal	Glycolysis	Heart	prenatal vs postnatal	human
1132.18	-0.855537	0.141908	-6.0288	1.65184183373496e-09	1.19524653835262e-08	NUP54	6.98856160426328e-09	prenatal	Glycolysis	Heart	prenatal vs postnatal	human
2443.22	-1.38683	0.136326	-10.173	2.61843022530215e-24	1.01837682600832e-22	NUP58	1.44013662391618e-22	prenatal	Glycolysis	Heart	prenatal vs postnatal	human
3595	-0.39908	0.163049	-2.44761	0.0143805	0.0297452	NCOR1	0.0232626	prenatal	Glycolysis	Heart	prenatal vs postnatal	human
2247.16	-0.246276	0.157049	-1.56815	0.116847	0.179135	FOXK2	0.154858	prenatal	Glycolysis	Heart	prenatal vs postnatal	human
4125.1	-0.530171	0.147931	-3.58391	0.00033849	0.00102262	PFKL	0.000702527	prenatal	Glycolysis	Heart	prenatal vs postnatal	human
21661.9	0.375835	0.168737	2.22735	0.0259241	0.049805	APP	0.0390638	postnatal	Glycolysis	Heart	prenatal vs postnatal	human
2372.81	-0.158046	0.122381	-1.29142	0.196557	0.27614	ARNT	0.242936	prenatal	Glycolysis	Heart	prenatal vs postnatal	human
28.4082	-7.10223	1.83995	-3.86001	0.000113381	0.000378276	PKLR	0.000259832	prenatal	Glycolysis	Heart	prenatal vs postnatal	human
10244.8	-0.930862	0.227432	-4.09292	4.25972469179836e-05	0.000154325	OGT	0.000104127	prenatal	Glycolysis	Heart	prenatal vs postnatal	human
81613.6	1.4824	0.221278	6.69926	2.09472389700258e-11	1.94383027733429e-10	ALDOA	1.15209814335142e-10	postnatal	Glycolysis	Heart	prenatal vs postnatal	human
18374	1.6437	0.264514	6.21403	5.16439042433742e-10	4.01005970500446e-09	PFKM	2.27233178670847e-09	postnatal	Glycolysis	Heart	prenatal vs postnatal	human
3470.8	-0.575004	0.137977	-4.16738	3.08116111497916e-05	0.000114658	RANBP2	7.88204006157461e-05	prenatal	Glycolysis	Heart	prenatal vs postnatal	human
1552.82	-1.18896	0.166502	-7.14085	9.27538550564466e-13	1.01829024685672e-11	NUP205	5.66829114233841e-12	prenatal	Glycolysis	Heart	prenatal vs postnatal	human
3.22974	1.1855	0.956701	1.23916	0.215287	0.297476	HKDC1	0.257408	postnatal	Glycolysis	Heart	prenatal vs postnatal	human
10491.9	-0.202277	0.212916	-0.950031	0.342097	0.435228	HK1	0.383986	prenatal	Glycolysis	Heart	prenatal vs postnatal	human
3138.57	0.150858	0.119622	1.26112	0.207266	0.288382	SEC13	0.253325	postnatal	Glycolysis	Heart	prenatal vs postnatal	human
691.9	0.956511	0.206043	4.6423	3.44557752851197e-06	1.52715248695418e-05	PRXL2C	9.9740402141136e-06	postnatal	Glycolysis	Heart	prenatal vs postnatal	human
1230.65	-0.51161	0.152826	-3.34765	0.000814986	0.00228374	ADPGK	0.00154566	prenatal	Glycolysis	Heart	prenatal vs postnatal	human
3154.83	-2.74826	0.35734	-7.69089	1.46112928680005e-14	2.03167645888544e-13	HK2	1.14803015391433e-13	prenatal	Glycolysis	Heart	prenatal vs postnatal	human
25.9932	0.205216	0.307124	0.668185	0.504015	0.593724	SLC2A6	0.538269	postnatal	Glycolysis	Heart	prenatal vs postnatal	human
22.9625	2.0802	0.364205	5.71162	1.11909000828766e-08	7.21515686230711e-08	HK3	4.10333003038809e-08	postnatal	Glycolysis	Heart	prenatal vs postnatal	human
1614.43	1.06261	0.149289	7.1178	1.09666773504504e-12	1.19209089966034e-11	JMJD8	6.34912899236601e-12	postnatal	Glycolysis	Heart	prenatal vs postnatal	human
3911.38	0.0448766	0.260011	0.172595	0.86297	0.898719	PRKAA2	0.870887	postnatal	Glycolysis	Heart	prenatal vs postnatal	human
500.665	-0.269416	0.158321	-1.70171	0.0888107	0.142191	NUP35	0.120607	prenatal	Glycolysis	Heart	prenatal vs postnatal	human
14130	2.69732	0.267082	10.0992	5.5678591871885e-24	2.08982364702923e-22	PGAM2	2.04154836863578e-22	postnatal	Glycolysis	Heart	prenatal vs postnatal	human
2361.44	-1.4784	0.197136	-7.49939	6.41152931216571e-14	8.23534316264432e-13	FOXK1	4.14863661375428e-13	prenatal	Glycolysis	Heart	prenatal vs postnatal	human
23.3654	1.32313	0.446581	2.96279	0.00304862	0.00749424	FBP1	0.00544392	postnatal	Glycolysis	Heart	prenatal vs postnatal	human
420.959	-1.69718	0.189039	-8.97798	2.75790827707606e-19	6.25007713828883e-18	PGM2L1	5.05616517463945e-18	prenatal	Glycolysis	Heart	prenatal vs postnatal	human
355.154	5.49879	0.594393	9.2511	2.22197241989578e-20	5.71083620884195e-19	GPD1	4.88833932377072e-19	postnatal	Glycolysis	Heart	prenatal vs postnatal	human
4179.6	-0.814951	0.459053	-1.77529	0.0758506	0.12442	DDIT4	0.105836	prenatal	Glycolysis	Heart	prenatal vs postnatal	human
2086.25	-1.38455	0.317034	-4.36721	1.25845448277737e-05	5.05043182185329e-05	PFKFB3	3.37634129525637e-05	prenatal	Glycolysis	Heart	prenatal vs postnatal	human
3768.8	0.312478	0.219133	1.42597	0.153876	0.225307	INSR	0.194556	postnatal	Glycolysis	Heart	prenatal vs postnatal	human
1942.28	-0.257723	0.229326	-1.12383	0.261086	0.349052	PGAM1	0.299161	prenatal	Glycolysis	Heart	prenatal vs postnatal	human
1420.99	-0.978212	0.314585	-3.10954	0.00187381	0.00483952	BPGM	0.00343532	prenatal	Glycolysis	Heart	prenatal vs postnatal	human
1268.08	3.65457	0.45045	8.11315	4.93253860991241e-16	8.02280741797992e-15	NUPR1	4.93253860991241e-15	postnatal	Glycolysis	Heart	prenatal vs postnatal	human
975.602	1.12656	0.18032	6.24759	4.16823629501481e-10	3.27697221445472e-09	ZBTB7A	1.91044163521512e-09	postnatal	Glycolysis	Heart	prenatal vs postnatal	human
1529.26	0.083631	0.19319	0.432896	0.66509	0.736246	DHTKD1	0.696761	postnatal	Glycolysis	Heart	prenatal vs postnatal	human
131.764	1.04255	0.433404	2.4055	0.0161504	0.03295	ZBTB20	0.0257471	postnatal	Glycolysis	Heart	prenatal vs postnatal	human
2257.35	1.32369	0.162474	8.14708	3.72817727823091e-16	6.11656975666086e-15	PRKAG1	4.10099500605401e-15	postnatal	Glycolysis	Heart	prenatal vs postnatal	human
2707.7	0.667073	0.309052	2.15845	0.0308932	0.057995	PPARA	0.0459224	postnatal	Glycolysis	Heart	prenatal vs postnatal	human
691.768	-0.215227	0.144532	-1.48913	0.136453	0.203621	ENTPD5	0.178688	prenatal	Glycolysis	Heart	prenatal vs postnatal	human
6.86476	-0.916344	0.744232	-1.23126	0.218225	0.300876	ENO4	0.258116	prenatal	Glycolysis	Heart	prenatal vs postnatal	human
853.913	-0.366976	0.162348	-2.26043	0.0237949	0.0461942	POM121	0.0363533	prenatal	Glycolysis	Heart	prenatal vs postnatal	human
839.182	-2.78977	0.501353	-5.56447	2.62945324673247e-08	1.60566035595321e-07	OGDHL	8.76484415577491e-08	prenatal	Glycolysis	Heart	prenatal vs postnatal	human
1823.62	-0.537753	0.15462	-3.4779	0.000505354	0.00147746	NUP62	0.00101071	prenatal	Glycolysis	Heart	prenatal vs postnatal	human
0.795369	-1.96105	1.3311	-1.47325	0.140683	0.208931	PGAM4	0.182061	prenatal	Glycolysis	Heart	prenatal vs postnatal	human
1060.03	0.134366	0.142895	0.940316	0.347056	0.440452	EIF6	0.385617	postnatal	Glycolysis	Heart	prenatal vs postnatal	human
5.64558	-0.381426	1.22798	-0.310612	0.756096	0.812072	ACTN3	0.777295	prenatal	Glycolysis	Heart	prenatal vs postnatal	human
894.17	-0.754662	0.163678	-4.61066	4.01390096963902e-06	1.75870839867533e-05	POM121C	1.13212591451357e-05	prenatal	Glycolysis	Heart	prenatal vs postnatal	human
560.134	0.434578	0.288001	1.50895	0.131312	0.197252	SEMA3F	0.170555	postnatal	Locomotion	Heart	prenatal vs postnatal	human
965.299	2.90239	0.343104	8.45922	2.69169186512313e-17	4.9816077506586e-16	CX3CL1	3.37956867509904e-16	postnatal	Locomotion	Heart	prenatal vs postnatal	human
1957.62	-0.102111	0.143148	-0.713326	0.475644	0.567123	RALA	0.530406	prenatal	Locomotion	Heart	prenatal vs postnatal	human
8.96118	2.14291	0.730468	2.93361	0.00335044	0.00814347	CCL26	0.00638089	postnatal	Locomotion	Heart	prenatal vs postnatal	human
782.007	1.86875	0.293101	6.3758	1.82006626926894e-10	1.49907482476972e-09	SEMA3G	9.95165266584147e-10	postnatal	Locomotion	Heart	prenatal vs postnatal	human
683.044	-0.544138	0.251788	-2.16109	0.0306883	0.0576716	ANOS1	0.0468618	prenatal	Locomotion	Heart	prenatal vs postnatal	human
268.241	-0.31612	0.245226	-1.2891	0.197365	0.277113	PLAUR	0.244417	prenatal	Locomotion	Heart	prenatal vs postnatal	human
1419.72	0.977092	0.199688	4.8931	9.92597199445584e-07	4.79474303812554e-06	SEMA3B	3.33158861992131e-06	postnatal	Locomotion	Heart	prenatal vs postnatal	human
29.5429	0.548865	0.300862	1.8243	0.068106	0.113689	ALOX5	0.0958005	postnatal	Locomotion	Heart	prenatal vs postnatal	human
26.8398	-1.8736	0.543946	-3.44446	0.000572191	0.00165512	DPEP1	0.00125144	prenatal	Locomotion	Heart	prenatal vs postnatal	human
1825.78	0.357145	0.20588	1.73472	0.0827896	0.134097	RALBP1	0.114554	postnatal	Locomotion	Heart	prenatal vs postnatal	human
2590.43	1.83143	0.316175	5.79246	6.93635714813257e-09	4.60232329589535e-08	ATP1A2	3.26586815724575e-08	postnatal	Locomotion	Heart	prenatal vs postnatal	human
358.016	-1.20642	0.335961	-3.59094	0.000329487	0.000997933	HGF	0.000759838	prenatal	Locomotion	Heart	prenatal vs postnatal	human
319.522	2.70651	0.312773	8.65326	5.00467705487324e-18	1.0042389534919e-16	TYMP	7.06910634000845e-17	postnatal	Locomotion	Heart	prenatal vs postnatal	human
152.302	-0.599478	0.273142	-2.19475	0.0281816	0.0535662	RTN4R	0.0432289	prenatal	Locomotion	Heart	prenatal vs postnatal	human
51.5968	-0.338919	0.276178	-1.22718	0.219756	0.30254	ARHGEF5	0.268943	prenatal	Locomotion	Heart	prenatal vs postnatal	human
3444.08	0.0270771	0.155091	0.174588	0.861403	0.897476	BCAR1	0.893014	postnatal	Locomotion	Heart	prenatal vs postnatal	human
287.861	-0.102617	0.182097	-0.563529	0.573075	0.656194	HOMER3	0.622614	prenatal	Locomotion	Heart	prenatal vs postnatal	human
911.264	0.380534	0.228509	1.66529	0.0958548	0.151683	PIK3CB	0.128438	postnatal	Locomotion	Heart	prenatal vs postnatal	human
1577.73	0.182013	0.154614	1.17721	0.239111	0.324496	ELMO2	0.287442	postnatal	Locomotion	Heart	prenatal vs postnatal	human
1067.75	-0.869629	0.241993	-3.5936	0.000326134	0.00098823	SLC12A2	0.000757257	prenatal	Locomotion	Heart	prenatal vs postnatal	human
682.873	-0.890753	0.3857	-2.30944	0.0209191	0.0413056	NTN1	0.0336093	prenatal	Locomotion	Heart	prenatal vs postnatal	human
27.7072	-0.471246	0.473793	-0.994624	0.319919	0.412044	PRKCQ	0.372689	prenatal	Locomotion	Heart	prenatal vs postnatal	human
11225.9	0.514355	0.131279	3.91803	8.92739113793277e-05	0.000304099	RHOA	0.000222528	postnatal	Locomotion	Heart	prenatal vs postnatal	human
138.071	-1.81536	0.545187	-3.3298	0.000869098	0.00241948	FGF10	0.0018414	prenatal	Locomotion	Heart	prenatal vs postnatal	human
9576.88	0.0698405	0.120484	0.579668	0.562138	0.645937	WDR1	0.612749	postnatal	Locomotion	Heart	prenatal vs postnatal	human
803.489	-2.77014	0.555307	-4.98849	6.08534598903184e-07	3.03833123917486e-06	SEMA3A	2.21820676374387e-06	prenatal	Locomotion	Heart	prenatal vs postnatal	human
1395.98	1.14786	0.351382	3.26671	0.00108807	0.00297243	SEMA3C	0.00223548	postnatal	Locomotion	Heart	prenatal vs postnatal	human
1696.16	0.404376	0.220512	1.83381	0.0666827	0.111709	PLD1	0.0945834	postnatal	Locomotion	Heart	prenatal vs postnatal	human
475.472	-1.12177	0.285821	-3.92473	8.68257193226784e-05	0.000296524	EDN1	0.000219588	prenatal	Locomotion	Heart	prenatal vs postnatal	human
1494.76	-0.0792383	0.134054	-0.591094	0.554457	0.639165	PSEN1	0.606326	prenatal	Locomotion	Heart	prenatal vs postnatal	human
455.445	4.11248	0.647757	6.34879	2.17013553716343e-10	1.7703138356373e-09	CXCL2	1.1677395985689e-09	postnatal	Locomotion	Heart	prenatal vs postnatal	human
1373.75	-1.3544	0.37888	-3.57474	0.000350577	0.00105661	SEMA5B	0.000803012	prenatal	Locomotion	Heart	prenatal vs postnatal	human
604.592	-0.400978	0.333513	-1.20229	0.229253	0.313563	WNT11	0.278554	prenatal	Locomotion	Heart	prenatal vs postnatal	human
9863.34	0.848322	0.164437	5.15895	2.48336290913763e-07	1.31803128352324e-06	MMP2	9.56659120679156e-07	postnatal	Locomotion	Heart	prenatal vs postnatal	human
36.8911	-1.03595	0.321178	-3.22547	0.00125768	0.00338888	CMTM1	0.00256839	prenatal	Locomotion	Heart	prenatal vs postnatal	human
1230.42	-0.312612	0.26935	-1.16062	0.245798	0.332003	SEMA6A	0.294436	prenatal	Locomotion	Heart	prenatal vs postnatal	human
408.283	-1.6035	0.466275	-3.43897	0.00058394	0.00168541	TGFB2	0.00126895	prenatal	Locomotion	Heart	prenatal vs postnatal	human
200.2	-1.85836	0.272036	-6.8313	8.41476485938623e-12	8.2029224561809e-11	SEMA4G	5.59334370065085e-11	prenatal	Locomotion	Heart	prenatal vs postnatal	human
8933.05	0.168951	0.211527	0.798722	0.424452	0.517305	NRP1	0.47963	postnatal	Locomotion	Heart	prenatal vs postnatal	human
197.509	1.75589	0.169261	10.3739	3.26070609687347e-25	1.36449199594957e-23	HSD3B7	1.00489033349101e-23	postnatal	Locomotion	Heart	prenatal vs postnatal	human
3.62432	1.02426	0.788181	1.29953	0.193763	0.272926	IGFALS	0.242383	postnatal	Locomotion	Heart	prenatal vs postnatal	human
12.579	-0.779543	0.650647	-1.1981	0.230877	0.31523	SERPIND1	0.279526	prenatal	Locomotion	Heart	prenatal vs postnatal	human
3374.64	-0.324508	0.177752	-1.82562	0.0679073	0.113423	CRKL	0.0958005	prenatal	Locomotion	Heart	prenatal vs postnatal	human
4360.93	-0.584033	0.132286	-4.41494	1.01039503124127e-05	4.13332055548921e-05	MAPK1	3.0045957507964e-05	prenatal	Locomotion	Heart	prenatal vs postnatal	human
1283.24	1.11176	0.388504	2.86164	0.0042145	0.0100109	PDGFB	0.00785008	postnatal	Locomotion	Heart	prenatal vs postnatal	human
2892.1	-0.702596	0.199663	-3.51891	0.000433326	0.00128463	EP300	0.000979318	prenatal	Locomotion	Heart	prenatal vs postnatal	human
239.263	3.38153	0.316721	10.6767	1.30857339745003e-26	6.44466306189218e-25	CHADL	4.92895979706179e-25	postnatal	Locomotion	Heart	prenatal vs postnatal	human
39.94	4.97006	0.67038	7.41379	1.22739855368932e-13	1.52327590565093e-12	CTSG	1.15153276030185e-12	postnatal	Locomotion	Heart	prenatal vs postnatal	human
462.814	0.567153	0.142626	3.9765	6.99366761146838e-05	0.000243051	ALKBH1	0.000180981	postnatal	Locomotion	Heart	prenatal vs postnatal	human
5.2973	-2.26211	1.02368	-2.20977	0.0271211	0.0518035	CHGA	0.0417911	prenatal	Locomotion	Heart	prenatal vs postnatal	human
1971.48	-0.0617282	0.0983902	-0.627381	0.530409	0.61769	SRP54	0.583795	prenatal	Locomotion	Heart	prenatal vs postnatal	human
2318.39	0.329186	0.201931	1.63019	0.103061	0.161099	PLP2	0.136475	postnatal	Locomotion	Heart	prenatal vs postnatal	human
3540.7	1.09571	0.2431	4.50725	6.56724558303363e-06	2.76963712222118e-05	FLT1	2.02390568422582e-05	postnatal	Locomotion	Heart	prenatal vs postnatal	human
183.028	1.5746	0.212478	7.41065	1.25683516611117e-13	1.55547183082199e-12	CORO1A	1.15153276030185e-12	postnatal	Locomotion	Heart	prenatal vs postnatal	human
0.912216	1.82475	1.64907	1.10653	0.268495	0.35708	CCL22	0.320493	postnatal	Locomotion	Heart	prenatal vs postnatal	human
4170.15	-0.330472	0.163689	-2.01891	0.043497	0.0776166	TSC2	0.0643907	prenatal	Locomotion	Heart	prenatal vs postnatal	human
386.817	-0.824793	0.297499	-2.77243	0.00556402	0.012817	ABCC1	0.0101409	prenatal	Locomotion	Heart	prenatal vs postnatal	human
14812.5	0.134956	0.210103	0.642332	0.520658	0.608652	RPS19	0.574928	postnatal	Locomotion	Heart	prenatal vs postnatal	human
532.108	5.03685	0.285389	17.6491	1.0346168948896e-69	3.64833506921938e-67	SCN1B	1.75367563683788e-67	postnatal	Locomotion	Heart	prenatal vs postnatal	human
40.3242	0.054804	0.45016	0.121743	0.903102	0.929171	PIK3CG	0.919374	postnatal	Locomotion	Heart	prenatal vs postnatal	human
5271.31	-0.799949	0.285329	-2.8036	0.00505349	0.0117598	PTN	0.00926018	prenatal	Locomotion	Heart	prenatal vs postnatal	human
353.787	2.08825	0.253207	8.24722	1.62124360971202e-16	2.78603182235567e-15	MET	1.96286279890134e-15	postnatal	Locomotion	Heart	prenatal vs postnatal	human
4.11847	4.82517	1.00594	4.79667	1.61322042443188e-06	7.53263428053496e-06	CCL24	5.25847811425393e-06	postnatal	Locomotion	Heart	prenatal vs postnatal	human
633.543	1.65807	0.297285	5.57738	2.44174916649102e-08	1.49760993057022e-07	RARRES2	1.02191724375365e-07	postnatal	Locomotion	Heart	prenatal vs postnatal	human
168.391	-0.77126	0.220967	-3.49038	0.000482331	0.0014161	C5	0.00107573	prenatal	Locomotion	Heart	prenatal vs postnatal	human
761.113	1.30389	0.242579	5.37512	7.65323738112897e-08	4.37727441649476e-07	PLGRKT	3.01679938628223e-07	postnatal	Locomotion	Heart	prenatal vs postnatal	human
943.078	0.864054	0.156094	5.53546	3.10409358867901e-08	1.87729163365639e-07	CREB3	1.26781653802673e-07	postnatal	Locomotion	Heart	prenatal vs postnatal	human
5566.74	0.513006	0.284626	1.80239	0.0714845	0.118428	CXCL12	0.100137	postnatal	Locomotion	Heart	prenatal vs postnatal	human
2731.19	0.179038	0.128108	1.39756	0.162246	0.235261	PPP3CB	0.205998	postnatal	Locomotion	Heart	prenatal vs postnatal	human
1.28905	1.6737	1.13295	1.4773	0.139594	0.207652	FGF8	0.18062	postnatal	Locomotion	Heart	prenatal vs postnatal	human
3429.74	0.0936402	0.179899	0.520516	0.602704	0.681738	GBF1	0.640491	postnatal	Locomotion	Heart	prenatal vs postnatal	human
647.768	1.41816	0.433043	3.27488	0.00105708	0.00289167	CCL2	0.00219847	postnatal	Locomotion	Heart	prenatal vs postnatal	human
15.746	3.33772	0.592229	5.63585	1.74195853327849e-08	1.0948093471867e-07	CCL8	7.60489870198172e-08	postnatal	Locomotion	Heart	prenatal vs postnatal	human
2.0182	-1.70936	1.02282	-1.67123	0.0946772	0.150098	PF4V1	0.127363	prenatal	Locomotion	Heart	prenatal vs postnatal	human
7141.59	-1.8515	0.266853	-6.93828	3.96914691231598e-12	4.04204961070546e-11	GAB1	2.89505195746538e-11	prenatal	Locomotion	Heart	prenatal vs postnatal	human
10652.9	-3.91256	0.175076	-22.3478	1.26773210453391e-110	1.86265060936713e-107	MDK	4.29761183436996e-108	prenatal	Locomotion	Heart	prenatal vs postnatal	human
101.58	0.630166	0.221962	2.83906	0.00452461	0.0106717	BIN2	0.00833609	postnatal	Locomotion	Heart	prenatal vs postnatal	human
551.243	-2.56509	0.356752	-7.19011	6.47368689944834e-13	7.31664946280813e-12	RIPOR2	5.22519014026902e-12	prenatal	Locomotion	Heart	prenatal vs postnatal	human
2012.33	-0.207171	0.160778	-1.28856	0.197552	0.277332	MAPK14	0.244417	prenatal	Locomotion	Heart	prenatal vs postnatal	human
17866.4	-1.21309	0.345881	-3.50726	0.000452753	0.00133772	VEGFA	0.00101645	prenatal	Locomotion	Heart	prenatal vs postnatal	human
4738.23	-1.64618	0.254072	-6.4792	9.22129880932443e-11	7.8771217574355e-10	SEMA5A	5.2100338272683e-10	prenatal	Locomotion	Heart	prenatal vs postnatal	human
1028.48	2.55498	0.185443	13.7777	3.47244444835313e-43	4.73380094461832e-41	HBEGF	3.92386222663904e-41	postnatal	Locomotion	Heart	prenatal vs postnatal	human
1118.61	-0.905727	0.344885	-2.62617	0.0086351	0.0189662	LOX	0.0150118	prenatal	Locomotion	Heart	prenatal vs postnatal	human
6239.06	0.51619	0.178787	2.88719	0.00388705	0.00931167	PDGFRB	0.00728017	postnatal	Locomotion	Heart	prenatal vs postnatal	human
9.49332	2.7998	0.821532	3.40803	0.000654347	0.00187168	HRG	0.00140395	postnatal	Locomotion	Heart	prenatal vs postnatal	human
902.145	-2.86496	0.33509	-8.54982	1.23279131119725e-17	2.35235438724629e-16	WNT5A	1.60737020959949e-16	prenatal	Locomotion	Heart	prenatal vs postnatal	human
0.854697	0.645904	1.5904	0.406128	0.684649	0.752927	CCL20	0.7253	postnatal	Locomotion	Heart	prenatal vs postnatal	human
1652.02	-1.32571	0.150223	-8.82497	1.09486225479721e-18	2.34650097671165e-17	PIKFYVE	1.76742049702978e-17	prenatal	Locomotion	Heart	prenatal vs postnatal	human
3.91374	4.43611	1.04156	4.25908	2.05267471552353e-05	7.90320107751504e-05	SLAMF1	5.75088205423534e-05	postnatal	Locomotion	Heart	prenatal vs postnatal	human
559.021	1.57386	0.381687	4.12343	3.73265095908122e-05	0.000136785	APOA1	9.88569277444168e-05	postnatal	Locomotion	Heart	prenatal vs postnatal	human
2261.8	-1.42021	0.33345	-4.25913	2.05228406742331e-05	7.90284751472689e-05	NRP2	5.75088205423534e-05	prenatal	Locomotion	Heart	prenatal vs postnatal	human
138.323	1.59048	0.373955	4.25312	2.10814176160482e-05	8.09907396414332e-05	CSF3R	5.8578693211806e-05	postnatal	Locomotion	Heart	prenatal vs postnatal	human
387.387	0.54622	0.265683	2.05591	0.0397912	0.0720793	PGF	0.0596868	postnatal	Locomotion	Heart	prenatal vs postnatal	human
2.42658	-2.52401	1.02063	-2.473	0.0133986	0.027959	TNFSF11	0.022375	prenatal	Locomotion	Heart	prenatal vs postnatal	human
45.4963	2.03826	0.309607	6.58338	4.59885660584208e-11	4.09652949325381e-10	CCRL2	2.73510945505345e-10	postnatal	Locomotion	Heart	prenatal vs postnatal	human
8.27432	1.94373	0.633911	3.06625	0.00216761	0.00552069	CCR2	0.0042231	postnatal	Locomotion	Heart	prenatal vs postnatal	human
1413.31	-0.861746	0.170681	-5.04887	4.44441219632278e-07	2.27045333892503e-06	PIK3CA	1.67406192728158e-06	prenatal	Locomotion	Heart	prenatal vs postnatal	human
737.742	-0.314247	0.256856	-1.22344	0.221164	0.304199	CXCR4	0.269693	prenatal	Locomotion	Heart	prenatal vs postnatal	human
4.79601	2.47658	0.504497	4.909	9.15407291213767e-07	4.44705669190494e-06	OPN4	3.13457648203502e-06	postnatal	Locomotion	Heart	prenatal vs postnatal	human
2.84785	-1.10381	0.763215	-1.44626	0.148103	0.218211	DNAI1	0.190178	prenatal	Locomotion	Heart	prenatal vs postnatal	human
578.759	1.35537	0.278386	4.86866	1.12358348312272e-06	5.38470336239435e-06	PLAU	3.69800777454955e-06	postnatal	Locomotion	Heart	prenatal vs postnatal	human
114.133	0.749729	0.317644	2.36028	0.0182613	0.0366598	NCKAP1L	0.0294789	postnatal	Locomotion	Heart	prenatal vs postnatal	human
11895.9	3.32274	0.582026	5.70893	1.13689343996446e-08	7.31950015976408e-08	NR4A1	5.20820102902639e-08	postnatal	Locomotion	Heart	prenatal vs postnatal	human
1498.95	-0.617745	0.229205	-2.69516	0.0070354	0.0158057	PREX1	0.0124889	prenatal	Locomotion	Heart	prenatal vs postnatal	human
18.0233	-3.37158	0.821705	-4.10316	4.07553277548637e-05	0.000148261	EDN3	0.000107101	prenatal	Locomotion	Heart	prenatal vs postnatal	human
8.09595	3.26214	0.654942	4.9808	6.33210507327093e-07	3.15258250890053e-06	TREM1	2.26711920736435e-06	postnatal	Locomotion	Heart	prenatal vs postnatal	human
4.49842	-0.0935396	0.881283	-0.10614	0.915471	0.938684	CXCL6	0.926402	prenatal	Locomotion	Heart	prenatal vs postnatal	human
673.939	-0.507113	0.275454	-1.841	0.0656211	0.110126	BMP4	0.0934686	prenatal	Locomotion	Heart	prenatal vs postnatal	human
1441.87	-0.380214	0.11133	-3.41521	0.00063732	0.00182574	NUP85	0.00137612	prenatal	Locomotion	Heart	prenatal vs postnatal	human
10.9043	0.350202	0.43473	0.805562	0.420495	0.513428	IL1B	0.47963	postnatal	Locomotion	Heart	prenatal vs postnatal	human
6001.87	4.86767	0.744499	6.53818	6.22715454974145e-11	5.44068570786297e-10	C3	3.63966446959026e-10	postnatal	Locomotion	Heart	prenatal vs postnatal	human
23.7162	3.53158	0.820236	4.30556	1.66564574300726e-05	6.53483651762544e-05	TNFSF14	4.75634418642232e-05	postnatal	Locomotion	Heart	prenatal vs postnatal	human
198.809	-2.05902	0.322353	-6.38747	1.68650858054671e-10	1.39428235166361e-09	FLRT3	9.37256407877599e-10	prenatal	Locomotion	Heart	prenatal vs postnatal	human
622.438	0.0497741	0.375241	0.132646	0.894473	0.922326	AMOT	0.919015	postnatal	Locomotion	Heart	prenatal vs postnatal	human
7.27152	2.95984	0.466813	6.34052	2.28988096954471e-10	1.86053708146080e-09	FFAR2	1.21292132605571e-09	postnatal	Locomotion	Heart	prenatal vs postnatal	human
5.81566	1.40737	0.702	2.0048	0.0449849	0.0798145	CCR7	0.0657322	postnatal	Locomotion	Heart	prenatal vs postnatal	human
4195.47	1.9134	0.181488	10.5428	5.4840145851329e-26	2.49631211244423e-24	SBDS	1.85908094436005e-24	postnatal	Locomotion	Heart	prenatal vs postnatal	human
14.1648	-1.41642	0.525553	-2.69511	0.00703654	0.015807	EDN2	0.0124889	prenatal	Locomotion	Heart	prenatal vs postnatal	human
14.7547	1.33246	0.37697	3.53466	0.000408299	0.00121588	ADGRE2	0.000928948	postnatal	Locomotion	Heart	prenatal vs postnatal	human
158.578	0.714821	0.310426	2.30271	0.0212951	0.0419542	RAC2	0.0340521	postnatal	Locomotion	Heart	prenatal vs postnatal	human
812.946	-0.56072	0.217343	-2.57989	0.00988326	0.0213705	DOCK4	0.0169213	prenatal	Locomotion	Heart	prenatal vs postnatal	human
567.287	-1.47328	0.179396	-8.21247	2.16684499584061e-16	3.66879318854011e-15	CLN6	2.53296708134471e-15	prenatal	Locomotion	Heart	prenatal vs postnatal	human
27.24	1.25449	0.480032	2.61336	0.00896575	0.0195998	ACKR4	0.0155071	postnatal	Locomotion	Heart	prenatal vs postnatal	human
464.898	-0.205404	0.211689	-0.970306	0.331894	0.424645	MOSPD2	0.385315	prenatal	Locomotion	Heart	prenatal vs postnatal	human
2920.2	-0.590559	0.249215	-2.36968	0.0178036	0.0358417	TRPM4	0.0288776	prenatal	Locomotion	Heart	prenatal vs postnatal	human
737.433	4.27987	0.323791	13.218	6.90738875946613e-40	7.80682523596585e-38	LSP1	5.85401197364755e-38	postnatal	Locomotion	Heart	prenatal vs postnatal	human
60.6558	-0.110086	0.445031	-0.247368	0.804624	0.85215	ARHGEF16	0.844481	prenatal	Locomotion	Heart	prenatal vs postnatal	human
2553.6	-1.46415	0.201772	-7.25643	3.97433912553209e-13	4.62019107045921e-12	PLXNA3	3.54552885146152e-12	prenatal	Locomotion	Heart	prenatal vs postnatal	human
1.36182	-2.2229	1.25735	-1.76793	0.0770723	0.126112	CCL25	0.107521	prenatal	Locomotion	Heart	prenatal vs postnatal	human
964.002	2.44118	0.208043	11.734	8.52905469945087e-32	6.30077959878148e-30	NINJ1	5.78269908622769e-30	postnatal	Locomotion	Heart	prenatal vs postnatal	human
7611.63	1.26018	0.428201	2.94297	0.00325082	0.0079356	LGALS3	0.00622614	postnatal	Locomotion	Heart	prenatal vs postnatal	human
94.624	1.16116	0.810344	1.43292	0.151881	0.222821	LGR6	0.194293	postnatal	Locomotion	Heart	prenatal vs postnatal	human
14.1846	-0.0755135	0.606902	-0.124424	0.900979	0.927492	SFTPD	0.919374	prenatal	Locomotion	Heart	prenatal vs postnatal	human
190.561	-0.473323	0.300308	-1.57612	0.114998	0.17674	VAV3	0.150518	prenatal	Locomotion	Heart	prenatal vs postnatal	human
108.207	0.876172	0.331683	2.64159	0.00825173	0.0182074	DOCK2	0.0144193	postnatal	Locomotion	Heart	prenatal vs postnatal	human
13.2445	1.74305	0.348434	5.00253	5.65819671493568e-07	2.84005178439749e-06	C5AR2	2.08492248517739e-06	postnatal	Locomotion	Heart	prenatal vs postnatal	human
2498.55	-0.175964	0.219345	-0.802223	0.422424	0.515235	PDGFRA	0.47963	prenatal	Locomotion	Heart	prenatal vs postnatal	human
2783.73	0.500787	0.256499	1.9524	0.0508912	0.0887049	ANXA1	0.073727	postnatal	Locomotion	Heart	prenatal vs postnatal	human
1671.94	-3.3958	0.362523	-9.36712	7.45355297281161e-21	2.01764703656037e-19	EPHA7	1.57922153611446e-19	prenatal	Locomotion	Heart	prenatal vs postnatal	human
179.362	0.316286	0.264803	1.19442	0.232313	0.316848	SEMA4F	0.280264	postnatal	Locomotion	Heart	prenatal vs postnatal	human
1424.12	0.153067	0.284346	0.538312	0.590362	0.670992	EDNRB	0.631333	postnatal	Locomotion	Heart	prenatal vs postnatal	human
7864.33	3.00741	0.833124	3.6098	0.000306439	0.000933577	GPNMB	0.000721408	postnatal	Locomotion	Heart	prenatal vs postnatal	human
6923.5	0.379366	0.0993984	3.81662	0.000135293	0.000444482	RAC1	0.000334775	postnatal	Locomotion	Heart	prenatal vs postnatal	human
44.3746	3.93211	0.886801	4.43404	9.24821042955687e-06	3.80384791960327e-05	IL6	2.82445345551331e-05	postnatal	Locomotion	Heart	prenatal vs postnatal	human
3.41173	1.78158	0.67101	2.65507	0.00792911	0.0175953	IL10	0.0139273	postnatal	Locomotion	Heart	prenatal vs postnatal	human
291.019	1.36843	0.373548	3.66334	0.000248949	0.000774037	ENPP2	0.000598537	postnatal	Locomotion	Heart	prenatal vs postnatal	human
364.867	0.215954	0.410282	0.526355	0.598642	0.678449	CCN3	0.638175	postnatal	Locomotion	Heart	prenatal vs postnatal	human
1652.97	3.29082	0.747601	4.40185	1.07333359828996e-05	4.36781869117934e-05	CCL21	3.14366704112776e-05	postnatal	Locomotion	Heart	prenatal vs postnatal	human
7.98919	-2.18456	0.602558	-3.62547	0.000288435	0.00088351	HCRTR2	0.000683771	prenatal	Locomotion	Heart	prenatal vs postnatal	human
125.635	-0.21867	0.233067	-0.938226	0.348128	0.441563	SLC37A4	0.402778	prenatal	Locomotion	Heart	prenatal vs postnatal	human
1707.37	-1.41946	0.211171	-6.72183	1.79461485429712e-11	1.67888854091248e-10	SEMA6D	1.16995083770523e-10	prenatal	Locomotion	Heart	prenatal vs postnatal	human
43.347	3.65106	0.63611	5.73967	9.48618498098437e-09	6.15810344114123e-08	CH25H	4.40522836788178e-08	postnatal	Locomotion	Heart	prenatal vs postnatal	human
5486.51	-0.311431	0.219554	-1.41847	0.156053	0.22786	ITGAV	0.19888	prenatal	Locomotion	Heart	prenatal vs postnatal	human
242.51	-1.85679	0.354292	-5.24086	1.59832999448706e-07	8.72467148899882e-07	SEMA7A	6.22797549575992e-07	prenatal	Locomotion	Heart	prenatal vs postnatal	human
561.734	-0.257839	0.325161	-0.792958	0.427802	0.520757	FGF2	0.481811	prenatal	Locomotion	Heart	prenatal vs postnatal	human
24.4734	5.92	0.747129	7.92366	2.3061483767146e-15	3.52343767296192e-14	CXCL9	2.52188483776209e-14	postnatal	Locomotion	Heart	prenatal vs postnatal	human
284.67	-3.87593	0.534453	-7.25215	4.10197674850482e-13	4.76229056486862e-12	LEF1	3.56556440446958e-12	prenatal	Locomotion	Heart	prenatal vs postnatal	human
3.22364	1.50785	0.871911	1.72936	0.0837452	0.135421	PIK3C2G	0.115032	postnatal	Locomotion	Heart	prenatal vs postnatal	human
630.442	1.3434	0.355822	3.77549	0.000159692	0.000516621	FGF7	0.000392287	postnatal	Locomotion	Heart	prenatal vs postnatal	human
1716.87	-0.959413	0.189126	-5.07288	3.91840767370394e-07	2.01772055581091e-06	CMTM3	1.49251708020858e-06	prenatal	Locomotion	Heart	prenatal vs postnatal	human
6.82362	-0.179667	0.613872	-0.292677	0.769769	0.823513	CMTM2	0.810409	prenatal	Locomotion	Heart	prenatal vs postnatal	human
725.694	1.3191	0.234712	5.62008	1.90868867210843e-08	1.19082541427817e-07	ARRB2	8.10069281175081e-08	postnatal	Locomotion	Heart	prenatal vs postnatal	human
84.5624	0.827784	0.523231	1.58206	0.113635	0.17492	TNFRSF11A	0.149311	postnatal	Locomotion	Heart	prenatal vs postnatal	human
46.9578	1.70058	0.341471	4.98016	6.35328391444287e-07	3.16253152052081e-06	VAV1	2.26711920736435e-06	postnatal	Locomotion	Heart	prenatal vs postnatal	human
19576.5	0.637093	0.184705	3.44925	0.000562137	0.00162906	COL6A1	0.00123743	postnatal	Locomotion	Heart	prenatal vs postnatal	human
28.7054	1.80837	0.319358	5.66252	1.49169135874353e-08	9.45154800304026e-08	TRPM2	6.65372856071126e-08	postnatal	Locomotion	Heart	prenatal vs postnatal	human
48963.5	0.809673	0.16115	5.02434	5.05163645822116e-07	2.55597148288837e-06	RPL13A	1.88187336190876e-06	postnatal	Locomotion	Heart	prenatal vs postnatal	human
1380.74	-0.733254	0.227845	-3.21822	0.00128989	0.0034658	EPHA2	0.00261841	prenatal	Locomotion	Heart	prenatal vs postnatal	human
6724.12	2.5691	0.387976	6.62179	3.54877224362622e-11	3.20869673597206e-10	CCN1	2.1873341647078e-10	postnatal	Locomotion	Heart	prenatal vs postnatal	human
10.5161	2.70374	0.781357	3.46031	0.000539547	0.00156876	XCL1	0.00119547	postnatal	Locomotion	Heart	prenatal vs postnatal	human
5.74447	5.33843	0.991835	5.38238	7.35076670635472e-08	4.21612940973679e-07	XCL2	2.93165872171088e-07	postnatal	Locomotion	Heart	prenatal vs postnatal	human
2506.17	-0.325911	0.158738	-2.05314	0.0400586	0.0724747	PIP5K1A	0.0598231	prenatal	Locomotion	Heart	prenatal vs postnatal	human
2662.9	1.00396	0.178163	5.63508	1.74979970134093e-08	1.09947618677509e-07	SEMA6C	7.60489870198172e-08	postnatal	Locomotion	Heart	prenatal vs postnatal	human
2280.78	0.0989998	0.0973531	1.01691	0.309194	0.400571	RAB13	0.362688	postnatal	Locomotion	Heart	prenatal vs postnatal	human
67.568	3.25739	0.398645	8.17115	3.05473390623946e-16	5.07784711617316e-15	S100A8	3.45184931405059e-15	postnatal	Locomotion	Heart	prenatal vs postnatal	human
655.245	0.235848	0.234506	1.00572	0.314548	0.406333	LYST	0.367696	postnatal	Locomotion	Heart	prenatal vs postnatal	human
1863.15	-0.430638	0.223576	-1.92613	0.0540878	0.0934391	ACKR3	0.0780245	prenatal	Locomotion	Heart	prenatal vs postnatal	human
68.3846	0.630813	0.504913	1.24935	0.211537	0.293229	ACKR2	0.259822	postnatal	Locomotion	Heart	prenatal vs postnatal	human
3153.71	-0.536959	0.209867	-2.55857	0.0105105	0.0225589	ITGA9	0.0178153	prenatal	Locomotion	Heart	prenatal vs postnatal	human
88.6979	2.41677	0.388524	6.22039	4.95933998314047e-10	3.85990772613643e-09	AGTR1	2.58648654505326e-09	postnatal	Locomotion	Heart	prenatal vs postnatal	human
1061.1	-0.233567	0.43087	-0.542082	0.587762	0.668697	SLIT2	0.630542	prenatal	Locomotion	Heart	prenatal vs postnatal	human
317.723	0.868499	1.03766	0.836982	0.402603	0.496047	CXCL14	0.461089	postnatal	Locomotion	Heart	prenatal vs postnatal	human
4.07302	-0.0490029	0.645356	-0.0759316	0.939473	0.956582	TPBG	0.947862	prenatal	Locomotion	Heart	prenatal vs postnatal	human
981.051	-0.647354	0.154963	-4.17748	2.94751351626609e-05	0.000110175	CASK	8.05812162914682e-05	prenatal	Locomotion	Heart	prenatal vs postnatal	human
676.006	-0.650678	0.199005	-3.26967	0.00107675	0.00294302	PTPRJ	0.00222571	prenatal	Locomotion	Heart	prenatal vs postnatal	human
556.592	-0.269702	0.203191	-1.32733	0.184399	0.261673	VEGFC	0.231523	prenatal	Locomotion	Heart	prenatal vs postnatal	human
1536.97	-1.44134	0.199218	-7.23497	4.65646684134348e-13	5.37771085384328e-12	FER	3.9463556480386e-12	prenatal	Locomotion	Heart	prenatal vs postnatal	human
22.3919	0.00348205	0.41443	0.00840201	0.993296	0.994989	PTPRO	0.993296	postnatal	Locomotion	Heart	prenatal vs postnatal	human
94.4877	0.558059	0.242559	2.30072	0.0214077	0.0421382	ADAM8	0.0340714	postnatal	Locomotion	Heart	prenatal vs postnatal	human
367.004	-0.96113	0.290879	-3.30422	0.000952398	0.00263006	CMTM7	0.00200536	prenatal	Locomotion	Heart	prenatal vs postnatal	human
563.48	-2.85025	0.521386	-5.46667	4.58555836727685e-08	2.70701477989667e-07	SEMA3D	1.85060034107958e-07	prenatal	Locomotion	Heart	prenatal vs postnatal	human
60.2635	-1.88923	0.515539	-3.66458	0.000247748	0.000770755	JPH3	0.000598537	prenatal	Locomotion	Heart	prenatal vs postnatal	human
645.279	-0.0409059	0.383629	-0.106629	0.915083	0.938395	ROBO3	0.926402	prenatal	Locomotion	Heart	prenatal vs postnatal	human
830.975	-1.96512	0.427779	-4.59378	4.35296768861336e-06	1.89440408854299e-05	ANGPT1	1.36634819114808e-05	prenatal	Locomotion	Heart	prenatal vs postnatal	human
1539.82	-1.32839	0.191715	-6.92898	4.23877218547002e-12	4.29842055173028e-11	CXADR	2.9936328559882e-11	prenatal	Locomotion	Heart	prenatal vs postnatal	human
55.5811	-0.0409204	0.312224	-0.131061	0.895727	0.923523	EPHB1	0.919015	prenatal	Locomotion	Heart	prenatal vs postnatal	human
1.95509	-2.18854	1.40802	-1.55434	0.120103	0.18315	CXCL13	0.156596	prenatal	Locomotion	Heart	prenatal vs postnatal	human
128.944	-2.42278	0.546909	-4.42995	9.4253287680971e-06	3.87007716084248e-05	NRG1	2.83688223071104e-05	prenatal	Locomotion	Heart	prenatal vs postnatal	human
594.942	-1.08818	0.247561	-4.3956	1.10466879224559e-05	4.48223006267552e-05	KIT	3.20070701342952e-05	prenatal	Locomotion	Heart	prenatal vs postnatal	human
18.9893	4.13559	0.411537	10.0491	9.2679906284745e-24	3.38550480871913e-22	SLAMF8	2.61820735254405e-22	postnatal	Locomotion	Heart	prenatal vs postnatal	human
204.053	1.72092	0.282376	6.09442	1.09834034900205e-09	8.14805251334005e-09	FCER1G	5.46664654235386e-09	postnatal	Locomotion	Heart	prenatal vs postnatal	human
2156.82	0.551841	0.293367	1.88106	0.059964	0.102038	RCAN1	0.0861347	postnatal	Locomotion	Heart	prenatal vs postnatal	human
237.524	2.17301	0.325168	6.68274	2.34518065899073e-11	2.16334122386912e-10	ITGB2	1.50003064792048e-10	postnatal	Locomotion	Heart	prenatal vs postnatal	human
89.1063	2.45298	0.395219	6.20664	5.41287239785801e-10	4.19561067720255e-09	JAML	2.78024809526344e-09	postnatal	Locomotion	Heart	prenatal vs postnatal	human
296.613	0.858514	0.383232	2.24019	0.0250783	0.0483769	IL6R	0.038998	postnatal	Locomotion	Heart	prenatal vs postnatal	human
15.5655	3.80518	0.55546	6.85051	7.35871044640837e-12	7.23210015518998e-11	CCR5	4.98920568266488e-11	postnatal	Locomotion	Heart	prenatal vs postnatal	human
37.8406	1.68822	0.381153	4.42925	9.45627410237012e-06	3.88157816522401e-05	GRIN2C	2.83688223071104e-05	postnatal	Locomotion	Heart	prenatal vs postnatal	human
418.433	5.51253	0.478523	11.5199	1.04771393306123e-30	7.14146659476041e-29	IP6K3	5.91958372179596e-29	postnatal	Locomotion	Heart	prenatal vs postnatal	human
140.04	1.60586	0.373019	4.30503	1.6696311450863e-05	6.54852957053202e-05	CXCL16	4.75634418642232e-05	postnatal	Locomotion	Heart	prenatal vs postnatal	human
1460.11	-2.20452	0.359257	-6.13633	8.44497945735079e-10	6.37398321086062e-09	VCAM1	4.27290751648047e-09	prenatal	Locomotion	Heart	prenatal vs postnatal	human
108.416	3.14767	0.420796	7.48026	7.41749629913962e-14	9.46312226837171e-13	S100A9	7.18437498688094e-13	postnatal	Locomotion	Heart	prenatal vs postnatal	human
9.68167	3.27748	0.776246	4.22222	2.41912347989399e-05	9.19364257404173e-05	S100A12	6.66734032263466e-05	postnatal	Locomotion	Heart	prenatal vs postnatal	human
134.622	-0.784258	0.474311	-1.65347	0.098236	0.154729	NPPC	0.13111	prenatal	Locomotion	Heart	prenatal vs postnatal	human
6.29871	-4.92443	1.7289	-2.8483	0.0043954	0.0104023	TAFA4	0.0081423	prenatal	Locomotion	Heart	prenatal vs postnatal	human
3.36552	4.51661	0.909786	4.96447	6.88879340227825e-07	3.41239781063969e-06	PROK2	2.38296016670646e-06	postnatal	Locomotion	Heart	prenatal vs postnatal	human
6.89922	7.24265	0.786938	9.20358	3.46218892377716e-20	8.7038508048607e-19	CXCR1	6.52045580644699e-19	postnatal	Locomotion	Heart	prenatal vs postnatal	human
1176.21	0.501031	0.163033	3.07319	0.00211784	0.00541216	IL17RC	0.00417411	postnatal	Locomotion	Heart	prenatal vs postnatal	human
53.4428	0.197739	0.906973	0.218021	0.827413	0.870014	CXCL3	0.865719	postnatal	Locomotion	Heart	prenatal vs postnatal	human
6.33687	-1.54744	0.763001	-2.0281	0.0425499	0.0762256	CXCL5	0.063265	prenatal	Locomotion	Heart	prenatal vs postnatal	human
131.742	-4.96138	0.43547	-11.3932	4.52232862883141e-30	2.85446360970655e-28	PPBP	2.19009915024835e-28	prenatal	Locomotion	Heart	prenatal vs postnatal	human
68.5853	-5.09434	0.517228	-9.84932	6.90110603116124e-23	2.31616181733657e-21	PF4	1.55964996304244e-21	prenatal	Locomotion	Heart	prenatal vs postnatal	human
36.4603	0.462555	0.720078	0.642368	0.520634	0.608652	CXCL1	0.574928	postnatal	Locomotion	Heart	prenatal vs postnatal	human
2735.56	-0.362514	0.134375	-2.69778	0.00698025	0.0157019	RYK	0.0124889	prenatal	Locomotion	Heart	prenatal vs postnatal	human
34.0468	0.461063	0.420696	1.09595	0.273099	0.361875	CCR1	0.324845	postnatal	Locomotion	Heart	prenatal vs postnatal	human
0.952923	0.218553	1.23405	0.177102	0.859428	0.895877	RHO	0.893014	postnatal	Locomotion	Heart	prenatal vs postnatal	human
454.794	0.688833	0.173919	3.96065	7.47449754327232e-05	0.000258234	PRKCD	0.000191959	postnatal	Locomotion	Heart	prenatal vs postnatal	human
9420.37	-2.01968	0.184233	-10.9627	5.7776279010642e-28	3.08688737574636e-26	HMGB2	2.44826982307595e-26	prenatal	Locomotion	Heart	prenatal vs postnatal	human
1981.36	-0.154879	0.193764	-0.799315	0.424108	0.517003	SLC25A46	0.47963	prenatal	Locomotion	Heart	prenatal vs postnatal	human
4.22055	4.00141	1.26452	3.16437	0.00155418	0.00409153	DEFB1	0.00309923	postnatal	Locomotion	Heart	prenatal vs postnatal	human
114.157	1.0867	0.277007	3.92302	8.74465363598725e-05	0.000298336	SYK	0.000219588	postnatal	Locomotion	Heart	prenatal vs postnatal	human
73.7978	2.4643	0.346841	7.10498	1.20340821462718e-12	1.30223146694946e-11	VEGFD	9.48733452927005e-12	postnatal	Locomotion	Heart	prenatal vs postnatal	human
183.625	2.48716	0.377147	6.59467	4.26212125414897e-11	3.81585378498571e-10	FOLR2	2.58010554492232e-10	postnatal	Locomotion	Heart	prenatal vs postnatal	human
48.1832	0.860836	0.318528	2.70254	0.00688119	0.0155028	CMTM5	0.0124489	postnatal	Locomotion	Heart	prenatal vs postnatal	human
7054.32	-0.399247	0.19076	-2.09293	0.0363558	0.0667803	PPIB	0.0547761	prenatal	Locomotion	Heart	prenatal vs postnatal	human
97.597	0.819561	0.408542	2.00606	0.0448495	0.0796332	CRK	0.0657322	postnatal	Locomotion	Heart	prenatal vs postnatal	human
422.454	0.694394	0.326103	2.12937	0.0332236	0.0618082	SEMA6B	0.0505059	postnatal	Locomotion	Heart	prenatal vs postnatal	human
67.2131	1.66022	0.57428	2.89096	0.00384073	0.00921238	CX3CR1	0.00723337	postnatal	Locomotion	Heart	prenatal vs postnatal	human
57.0201	0.655251	0.448463	1.4611	0.143987	0.213131	BDKRB2	0.185595	postnatal	Locomotion	Heart	prenatal vs postnatal	human
44.3594	-0.616163	0.444987	-1.38468	0.166152	0.239819	GDNF	0.210169	prenatal	Locomotion	Heart	prenatal vs postnatal	human
2177.66	0.295427	0.132277	2.2334	0.0255228	0.0491311	SEMA4C	0.0395078	postnatal	Locomotion	Heart	prenatal vs postnatal	human
405.6	1.81294	0.207039	8.75651	2.01393657019136e-18	4.19060428574752e-17	LGALS9	3.10329316952215e-17	postnatal	Locomotion	Heart	prenatal vs postnatal	human
1819.45	0.0959056	0.125068	0.766829	0.443183	0.536313	MAP2K1	0.495839	postnatal	Locomotion	Heart	prenatal vs postnatal	human
19.776	4.37538	0.87963	4.97411	6.55472540734975e-07	3.25728716362606e-06	CXCL10	2.31463740947038e-06	postnatal	Locomotion	Heart	prenatal vs postnatal	human
3.04648	3.7317	1.13382	3.29126	0.000997414	0.00274064	CXCL11	0.00208718	postnatal	Locomotion	Heart	prenatal vs postnatal	human
2.29312	0.143678	0.813078	0.176709	0.859737	0.896093	RNASE2	0.893014	postnatal	Locomotion	Heart	prenatal vs postnatal	human
48.5346	0.710765	0.312274	2.2761	0.0228403	0.0445601	PTAFR	0.0360133	postnatal	Locomotion	Heart	prenatal vs postnatal	human
42.1605	0.980134	0.55881	1.75397	0.0794364	0.129411	CXCL8	0.110365	postnatal	Locomotion	Heart	prenatal vs postnatal	human
120.104	-0.0691722	0.536061	-0.129038	0.897328	0.924705	GPR183	0.919015	prenatal	Locomotion	Heart	prenatal vs postnatal	human
285.094	-1.78379	0.232896	-7.6592	1.87098732920999e-14	2.5611802223404e-13	RAC3	1.92201425637026e-13	prenatal	Locomotion	Heart	prenatal vs postnatal	human
10.2017	-4.16751	0.906539	-4.59716	4.28279926618195e-06	1.86755469402661e-05	NRG4	1.35688687031372e-05	prenatal	Locomotion	Heart	prenatal vs postnatal	human
2701.57	-2.47168	0.24995	-9.8887	4.66038220110901e-23	1.59447772409741e-21	ROBO1	1.12847826155425e-21	prenatal	Locomotion	Heart	prenatal vs postnatal	human
136.254	1.49225	0.246117	6.06319	1.3344864763448e-09	9.78191902435998e-09	CMTM8	6.46272736401266e-09	postnatal	Locomotion	Heart	prenatal vs postnatal	human
7.98292	-2.86676	0.922567	-3.10738	0.00188756	0.00487122	SEMA3E	0.00374201	prenatal	Locomotion	Heart	prenatal vs postnatal	human
2.21418	-1.67422	1.22608	-1.36551	0.172093	0.246967	HOXB9	0.216876	prenatal	Locomotion	Heart	prenatal vs postnatal	human
74.4251	-3.20112	0.56247	-5.69118	1.26165643881777e-08	8.08114018828133e-08	GPR37	5.70268710345633e-08	prenatal	Locomotion	Heart	prenatal vs postnatal	human
2.04539	2.70354	1.06424	2.54034	0.0110745	0.0236048	PLA2G1B	0.0186779	postnatal	Locomotion	Heart	prenatal vs postnatal	human
2815.99	0.3078	0.28174	1.0925	0.274615	0.36361	S1PR1	0.325505	postnatal	Locomotion	Heart	prenatal vs postnatal	human
1.46537	1.72139	1.34915	1.27591	0.201989	0.282379	FPR2	0.248997	postnatal	Locomotion	Heart	prenatal vs postnatal	human
32.0887	1.58551	0.473661	3.34736	0.000815863	0.00228595	FPR1	0.00173948	postnatal	Locomotion	Heart	prenatal vs postnatal	human
431.422	-0.712471	0.273415	-2.60582	0.00916546	0.01999	PIK3CD	0.015772	prenatal	Locomotion	Heart	prenatal vs postnatal	human
1112.81	0.239992	0.235669	1.01834	0.308515	0.399907	PLEKHG5	0.362688	postnatal	Locomotion	Heart	prenatal vs postnatal	human
58.1201	1.38059	0.383964	3.59561	0.000323626	0.00098108	C3AR1	0.000756616	postnatal	Locomotion	Heart	prenatal vs postnatal	human
23.8083	-1.64586	0.611198	-2.69284	0.0070847	0.0159016	SCG2	0.0125089	prenatal	Locomotion	Heart	prenatal vs postnatal	human
44.2743	3.79723	0.442073	8.5896	8.72760860525036e-18	1.69969856246728e-16	CCL11	1.18346372687195e-16	postnatal	Locomotion	Heart	prenatal vs postnatal	human
4.57012	3.71483	0.900246	4.12646	3.68396109064888e-05	0.000135188	CXCR6	9.88569277444168e-05	postnatal	Locomotion	Heart	prenatal vs postnatal	human
2.95787	-1.86675	0.814989	-2.29052	0.0219912	0.0431264	AZU1	0.0348366	prenatal	Locomotion	Heart	prenatal vs postnatal	human
32519.3	2.4262	0.242096	10.0217	1.2241619804877e-23	4.42892091627334e-22	BSG	3.19223777988715e-22	postnatal	Locomotion	Heart	prenatal vs postnatal	human
285.38	1.38921	0.213032	6.52114	6.97727361854873e-11	6.06401430791187e-10	IL16	4.00897585879325e-10	postnatal	Locomotion	Heart	prenatal vs postnatal	human
1107.45	0.423422	0.164371	2.57602	0.00999454	0.0215811	CORO1B	0.0170259	postnatal	Locomotion	Heart	prenatal vs postnatal	human
81.8676	-0.302321	0.384587	-0.786093	0.431813	0.524848	CYP7B1	0.484718	prenatal	Locomotion	Heart	prenatal vs postnatal	human
34.7487	1.24058	0.389566	3.18451	0.00144999	0.00384556	CYSLTR1	0.00290856	postnatal	Locomotion	Heart	prenatal vs postnatal	human
6365.32	1.50806	0.208578	7.2302	4.82285064213263e-13	5.555310580683e-12	VEGFB	3.98767406751942e-12	postnatal	Locomotion	Heart	prenatal vs postnatal	human
341.346	1.29168	0.216528	5.96544	2.43970860859562e-09	1.72337002060706e-08	CMKLR1	1.16487495537171e-08	postnatal	Locomotion	Heart	prenatal vs postnatal	human
449.105	1.46219	0.192426	7.59873	2.99056412035965e-14	3.99855658701475e-13	HRAS	2.98176834353507e-13	postnatal	Locomotion	Heart	prenatal vs postnatal	human
2673.78	0.673069	0.249151	2.70145	0.00690383	0.0155432	FZD4	0.0124489	postnatal	Locomotion	Heart	prenatal vs postnatal	human
20.4611	2.96368	0.713618	4.15303	3.2809995193901e-05	0.000121513	FOSL1	8.89807069658594e-05	postnatal	Locomotion	Heart	prenatal vs postnatal	human
655.863	1.01754	0.18331	5.55093	2.84152969974608e-08	1.72639411829048e-07	RHOG	1.17472996123649e-07	postnatal	Locomotion	Heart	prenatal vs postnatal	human
375.257	0.817089	0.17202	4.74998	2.03439660403413e-06	9.36367681637499e-06	IL17RA	6.56819475016734e-06	postnatal	Locomotion	Heart	prenatal vs postnatal	human
12462.9	-0.00772515	0.222427	-0.0347311	0.972294	0.97989	PLEC	0.978064	prenatal	Locomotion	Heart	prenatal vs postnatal	human
447.358	3.82329	0.551169	6.9367	4.01378884958327e-12	4.08436605251746e-11	EGR3	2.89505195746538e-11	postnatal	Locomotion	Heart	prenatal vs postnatal	human
49.4814	-2.10901	0.888095	-2.37476	0.0175605	0.0354169	CXCR2	0.0286202	prenatal	Locomotion	Heart	prenatal vs postnatal	human
1314.92	-0.289436	0.173161	-1.67148	0.0946266	0.150035	SCRIB	0.127363	prenatal	Locomotion	Heart	prenatal vs postnatal	human
5.30198	4.30051	0.916952	4.69	2.73201492725518e-06	1.23047681847952e-05	CCL13	8.7372930220708e-06	postnatal	Locomotion	Heart	prenatal vs postnatal	human
763.983	-1.94805	0.283444	-6.87277	6.29675071468668e-12	6.23474976231069e-11	UNC5C	4.35632345363017e-11	prenatal	Locomotion	Heart	prenatal vs postnatal	human
2088.74	-0.0935254	0.172425	-0.542413	0.587534	0.668524	ATP6AP2	0.630542	prenatal	Locomotion	Heart	prenatal vs postnatal	human
639.434	1.00986	0.206599	4.88802	1.01856831586499e-06	4.90943616724645e-06	FES	3.38524175566892e-06	postnatal	Locomotion	Heart	prenatal vs postnatal	human
8393.62	1.17561	0.240119	4.89594	9.7837552488225e-07	4.73123011639438e-06	GAS6	3.31669302935083e-06	postnatal	Locomotion	Heart	prenatal vs postnatal	human
105.603	2.31606	0.46613	4.9687	6.7404904200839e-07	3.34520079076673e-06	PTGDR2	2.35569716743138e-06	postnatal	Locomotion	Heart	prenatal vs postnatal	human
60.8318	0.888235	0.689224	1.28875	0.197486	0.277254	GRIN2A	0.244417	postnatal	Locomotion	Heart	prenatal vs postnatal	human
6.57743	-1.65727	0.691449	-2.39681	0.0165384	0.0336204	CCR4	0.0270846	prenatal	Locomotion	Heart	prenatal vs postnatal	human
3775.1	-1.1225	0.351034	-3.1977	0.00138528	0.00369096	SLIT3	0.00279529	prenatal	Locomotion	Heart	prenatal vs postnatal	human
1314.22	-0.656248	0.176769	-3.71247	0.000205247	0.000650156	EFNA5	0.000500565	prenatal	Locomotion	Heart	prenatal vs postnatal	human
10.6286	0.359935	0.643625	0.559231	0.576004	0.658702	COLEC10	0.622614	postnatal	Locomotion	Heart	prenatal vs postnatal	human
813.707	0.202672	0.187309	1.08202	0.279244	0.368497	PLA2G6	0.329838	postnatal	Locomotion	Heart	prenatal vs postnatal	human
49.8811	1.06498	0.270821	3.93242	8.40946671584889e-05	0.000287791	CCR10	0.000214347	postnatal	Locomotion	Heart	prenatal vs postnatal	human
1634.63	-0.175706	0.314764	-0.558214	0.576698	0.659401	PDE4B	0.622614	prenatal	Locomotion	Heart	prenatal vs postnatal	human
698.121	-3.41776	0.370445	-9.2261	2.80666233491035e-20	7.13728834340136e-19	ROBO2	5.59681489138006e-19	prenatal	Locomotion	Heart	prenatal vs postnatal	human
1269.13	0.0660919	0.214932	0.307501	0.758462	0.814166	SEMA4B	0.800993	postnatal	Locomotion	Heart	prenatal vs postnatal	human
2531.99	-2.23093	0.318581	-7.00271	2.51060123902463e-12	2.608953672632e-11	FLRT2	1.89131960006522e-11	prenatal	Locomotion	Heart	prenatal vs postnatal	human
167.361	-0.13585	0.22673	-0.59917	0.549059	0.634603	NTF3	0.602366	prenatal	Locomotion	Heart	prenatal vs postnatal	human
90.9925	-4.65418	0.697177	-6.67576	2.45962242957934e-11	2.26102309332933e-10	NRG3	1.5440963030137e-10	prenatal	Locomotion	Heart	prenatal vs postnatal	human
200.018	-0.601972	0.305704	-1.96914	0.0489375	0.08582	RTN4RL1	0.071201	prenatal	Locomotion	Heart	prenatal vs postnatal	human
1975.67	-0.0272189	0.160846	-0.169224	0.865621	0.900593	PIP5K1C	0.89465	prenatal	Locomotion	Heart	prenatal vs postnatal	human
2.69817	4.01982	0.996602	4.03353	5.49451278781949e-05	0.00019466	CXCR3	0.00014328	postnatal	Locomotion	Heart	prenatal vs postnatal	human
70.9624	-2.56364	0.285935	-8.96582	3.07992796074047e-19	6.93823294528987e-18	SLIT1	5.49523988784746e-18	prenatal	Locomotion	Heart	prenatal vs postnatal	human
39.2689	3.92326	0.438298	8.95112	3.51877696783537e-19	7.88653342952051e-18	FPR3	5.96432696048095e-18	postnatal	Locomotion	Heart	prenatal vs postnatal	human
649.021	0.567607	0.187767	3.02293	0.00250336	0.00628264	SEMA4D	0.00484937	postnatal	Locomotion	Heart	prenatal vs postnatal	human
5.27628	-1.45684	0.842605	-1.72897	0.0838138	0.135499	WNT7B	0.115032	prenatal	Locomotion	Heart	prenatal vs postnatal	human
2.9832	2.75095	1.13611	2.42138	0.0154617	0.0317161	CNR2	0.0256937	postnatal	Locomotion	Heart	prenatal vs postnatal	human
8853.83	-0.543503	0.131759	-4.12497	3.70785118782419e-05	0.00013597	HMGB1	9.88569277444168e-05	prenatal	Locomotion	Heart	prenatal vs postnatal	human
1278.86	0.858096	0.35779	2.39832	0.0164704	0.0334994	S100A4	0.0270846	postnatal	Locomotion	Heart	prenatal vs postnatal	human
145.896	-0.918414	0.252414	-3.63852	0.000274212	0.000844935	SEMA4A	0.000654632	prenatal	Locomotion	Heart	prenatal vs postnatal	human
11734.3	-0.264674	0.161529	-1.63855	0.101307	0.158808	PPIA	0.134678	prenatal	Locomotion	Heart	prenatal vs postnatal	human
107.062	1.28018	0.290859	4.40137	1.07570907602012e-05	4.37546569263367e-05	C5AR1	3.14366704112776e-05	postnatal	Locomotion	Heart	prenatal vs postnatal	human
1137.27	0.449123	0.199105	2.25572	0.0240884	0.0467023	PDGFA	0.0376312	postnatal	Locomotion	Heart	prenatal vs postnatal	human
359.271	-2.59041	0.29651	-8.73633	2.40815691066617e-18	4.95630551100296e-17	SPN	3.54941388137317e-17	prenatal	Locomotion	Heart	prenatal vs postnatal	human
198.846	1.12097	0.597825	1.87508	0.0607823	0.103191	DPP4	0.0869418	postnatal	Locomotion	Heart	prenatal vs postnatal	human
2809.8	0.00374211	0.136375	0.0274399	0.978109	0.98411	PARVA	0.981003	postnatal	Locomotion	Heart	prenatal vs postnatal	human
691.301	0.712268	0.243601	2.92392	0.00345657	0.00837805	LPAR1	0.00654625	postnatal	Locomotion	Heart	prenatal vs postnatal	human
94.4591	1.13052	0.382487	2.95572	0.00311943	0.00764452	PLXNB3	0.00600845	postnatal	Locomotion	Heart	prenatal vs postnatal	human
329.476	2.31044	0.411124	5.61981	1.91166792017718e-08	1.19212170443117e-07	L1CAM	8.10069281175081e-08	postnatal	Locomotion	Heart	prenatal vs postnatal	human
968.27	-0.232992	0.13603	-1.7128	0.0867491	0.139509	MACO1	0.118104	prenatal	Locomotion	Heart	prenatal vs postnatal	human
637.308	0.523524	0.211537	2.47486	0.0133288	0.027831	ZNF580	0.0223687	postnatal	Locomotion	Heart	prenatal vs postnatal	human
24.9318	-0.877805	0.436073	-2.01298	0.0441171	0.078535	LTB4R2	0.0650248	prenatal	Locomotion	Heart	prenatal vs postnatal	human
3154.11	0.241978	0.258544	0.935925	0.349312	0.442741	ITGA1	0.402778	postnatal	Locomotion	Heart	prenatal vs postnatal	human
2.59236	1.28678	0.753103	1.70864	0.0875184	0.140509	MSMP	0.118675	postnatal	Locomotion	Heart	prenatal vs postnatal	human
65.3621	-0.764286	0.249087	-3.06835	0.00215245	0.00548851	CKLF	0.00421781	prenatal	Locomotion	Heart	prenatal vs postnatal	human
2716.53	-1.64391	0.269832	-6.09235	1.11268026968264e-09	8.2474930191415e-09	PLXNA4	5.46664654235386e-09	prenatal	Locomotion	Heart	prenatal vs postnatal	human
1607.93	-0.382844	0.159024	-2.40747	0.0160635	0.0328005	ARPIN	0.0265636	prenatal	Locomotion	Heart	prenatal vs postnatal	human
250.21	0.612082	0.289878	2.11151	0.0347282	0.0642232	ECSCR	0.0525574	postnatal	Locomotion	Heart	prenatal vs postnatal	human
449.647	0.48163	0.280139	1.71926	0.0855679	0.137913	SHANK3	0.116966	postnatal	Locomotion	Heart	prenatal vs postnatal	human
87.2806	0.281409	0.307884	0.914013	0.36071	0.454488	LRRC24	0.414511	postnatal	Locomotion	Heart	prenatal vs postnatal	human
267.379	-2.21445	0.312089	-7.09556	1.28824518021971e-12	1.38892051696986e-11	ITGB3	9.92534354760182e-12	prenatal	Locomotion	Heart	prenatal vs postnatal	human
25.0147	3.80968	0.482965	7.88811	3.06806613490289e-15	4.61029233351005e-14	CCL5	3.25023256166275e-14	postnatal	Locomotion	Heart	prenatal vs postnatal	human
5.44333	1.75565	0.77339	2.27008	0.023203	0.045181	CCL4	0.0364158	postnatal	Locomotion	Heart	prenatal vs postnatal	human
1.35503	1.85437	1.15589	1.60428	0.108653	0.168408	CCL3L1	0.14332	postnatal	Locomotion	Heart	prenatal vs postnatal	human
92.9276	-3.76306	0.826697	-4.55192	5.31591484837243e-06	2.28045417672191e-05	NEFL	1.65329828770482e-05	prenatal	Locomotion	Heart	prenatal vs postnatal	human
7.61881	0.570814	0.849922	0.671607	0.501834	0.591786	CCL3	0.557776	postnatal	Locomotion	Heart	prenatal vs postnatal	human
5.06246	2.92979	0.6555	4.46956	7.83819247416149e-06	2.71326936056808e-05	ND6	8.39806336517302e-06	postnatal	mtDNA	Forebrain/Cerebrum	prenatal vs postnatal	human
365.276	2.80378	0.273341	10.2574	1.09568707795879e-24	4.16584130250895e-23	COX2	1.64353061693818e-23	postnatal	mtDNA	Forebrain/Cerebrum	prenatal vs postnatal	human
454.204	2.30855	0.322261	7.16359	7.85887309115049e-13	7.07606397878702e-12	CYTB	1.30981218185841e-12	postnatal	mtDNA	Forebrain/Cerebrum	prenatal vs postnatal	human
257.016	2.8747	0.342788	8.38624	5.01956910417194e-17	7.72424320850022e-16	ND2	1.88233841406448e-16	postnatal	mtDNA	Forebrain/Cerebrum	prenatal vs postnatal	human
157.002	1.66825	0.440158	3.79011	0.000150579	0.00042432	ND5	0.000150579	postnatal	mtDNA	Forebrain/Cerebrum	prenatal vs postnatal	human
381.5	1.92097	0.317251	6.05503	1.40387158438068e-09	8.31746598485967e-09	COX1	1.91437034233729e-09	postnatal	mtDNA	Forebrain/Cerebrum	prenatal vs postnatal	human
119.548	2.28844	0.311766	7.34024	2.1321677404496e-13	2.07820289483353e-12	ND3	4.568930872392e-13	postnatal	mtDNA	Forebrain/Cerebrum	prenatal vs postnatal	human
726.166	2.09612	0.309616	6.77006	1.28731355608281e-11	1.00078247424502e-10	ND4	1.93097033412422e-11	postnatal	mtDNA	Forebrain/Cerebrum	prenatal vs postnatal	human
336.482	2.88208	0.401962	7.17003	7.49791182622377e-13	6.76941380709581e-12	ND1	1.30981218185841e-12	postnatal	mtDNA	Forebrain/Cerebrum	prenatal vs postnatal	human
267.098	2.15494	0.290349	7.42188	1.15465693765662e-13	1.16337720583042e-12	ATP6	3.46397081296985e-13	postnatal	mtDNA	Forebrain/Cerebrum	prenatal vs postnatal	human
484.784	1.97383	0.267388	7.3819	1.56048698536405e-13	1.55083448854736e-12	COX3	3.90121746341011e-13	postnatal	mtDNA	Forebrain/Cerebrum	prenatal vs postnatal	human
1090.08	3.35085	0.395361	8.4754	2.34266429748662e-17	3.78218151626635e-16	16S	1.17133214874331e-16	postnatal	mtDNA	Forebrain/Cerebrum	prenatal vs postnatal	human
174.793	3.52316	0.413889	8.51234	1.70460902750392e-17	2.79739352981478e-16	12S	1.17133214874331e-16	postnatal	mtDNA	Forebrain/Cerebrum	prenatal vs postnatal	human
43.464	2.48991	0.465925	5.34402	9.09067537314028e-08	4.20470117398118e-07	ND4L	1.04892408151619e-07	postnatal	mtDNA	Forebrain/Cerebrum	prenatal vs postnatal	human
68.5726	2.80395	0.519142	5.40113	6.62232133267387e-08	3.12147398589315e-07	ATP8	8.27790166584234e-08	postnatal	mtDNA	Forebrain/Cerebrum	prenatal vs postnatal	human
1189.3	0.315685	0.134073	2.35458	0.0185436	0.0342199	MRPS10	0.0292794	postnatal	Small Subunit of Mitochondrial Ribosome	Forebrain/Cerebrum	prenatal vs postnatal	human
1794.29	0.0757758	0.108824	0.696318	0.48623	0.570808	MRPS35	0.540256	postnatal	Small Subunit of Mitochondrial Ribosome	Forebrain/Cerebrum	prenatal vs postnatal	human
10.921	0.387083	0.348788	1.10979	0.267087	0.349794	MRPS24	0.348375	postnatal	Small Subunit of Mitochondrial Ribosome	Forebrain/Cerebrum	prenatal vs postnatal	human
1776.27	0.151655	0.202816	0.747746	0.454613	0.540529	MRPS34	0.526477	postnatal	Small Subunit of Mitochondrial Ribosome	Forebrain/Cerebrum	prenatal vs postnatal	human
1244.48	0.962877	0.143594	6.70556	2.0063328668984e-11	1.52250686880466e-10	MRPS33	3.0094993003476e-10	postnatal	Small Subunit of Mitochondrial Ribosome	Forebrain/Cerebrum	prenatal vs postnatal	human
931.42	1.07924	0.193737	5.57064	2.53806908102157e-08	1.27261168485317e-07	MRPS18A	1.52284144861294e-07	postnatal	Small Subunit of Mitochondrial Ribosome	Forebrain/Cerebrum	prenatal vs postnatal	human
917.34	-0.48277	0.131303	-3.67678	0.000236199	0.000642272	MRPS31	0.000644179	prenatal	Small Subunit of Mitochondrial Ribosome	Forebrain/Cerebrum	prenatal vs postnatal	human
1765.91	0.0391322	0.173748	0.225223	0.821805	0.864474	MRPS30	0.850144	postnatal	Small Subunit of Mitochondrial Ribosome	Forebrain/Cerebrum	prenatal vs postnatal	human
3379.12	-0.120595	0.203255	-0.593318	0.552968	0.633187	MRPS27	0.592466	prenatal	Small Subunit of Mitochondrial Ribosome	Forebrain/Cerebrum	prenatal vs postnatal	human
1505.96	0.74972	0.172126	4.35566	1.32666585628304e-05	4.43766313512005e-05	MRPS15	5.68571081264162e-05	postnatal	Small Subunit of Mitochondrial Ribosome	Forebrain/Cerebrum	prenatal vs postnatal	human
1217.51	0.231258	0.085869	2.69315	0.00707811	0.0143787	MRPS14	0.0117969	postnatal	Small Subunit of Mitochondrial Ribosome	Forebrain/Cerebrum	prenatal vs postnatal	human
1661.06	-0.223463	0.225671	-0.990215	0.322069	0.408328	MRPS2	0.402586	prenatal	Small Subunit of Mitochondrial Ribosome	Forebrain/Cerebrum	prenatal vs postnatal	human
1840.22	0.537469	0.166127	3.2353	0.00121517	0.00289979	MRPS7	0.00235885	postnatal	Small Subunit of Mitochondrial Ribosome	Forebrain/Cerebrum	prenatal vs postnatal	human
1654.79	0.339829	0.162257	2.09439	0.0362249	0.0622869	MRPS26	0.0543374	postnatal	Small Subunit of Mitochondrial Ribosome	Forebrain/Cerebrum	prenatal vs postnatal	human
65.431	1.3168	0.205919	6.39476	1.60798566445371e-10	1.08496372988338e-09	MRPS12	1.60798566445371e-09	postnatal	Small Subunit of Mitochondrial Ribosome	Forebrain/Cerebrum	prenatal vs postnatal	human
3377.15	0.470158	0.132995	3.53515	0.000407541	0.00106147	MRPS25	0.00101885	postnatal	Small Subunit of Mitochondrial Ribosome	Forebrain/Cerebrum	prenatal vs postnatal	human
2650.92	-0.0730313	0.0980304	-0.744987	0.45628	0.542082	DAP3	0.526477	prenatal	Small Subunit of Mitochondrial Ribosome	Forebrain/Cerebrum	prenatal vs postnatal	human
401.441	0.631652	0.169562	3.72519	0.000195167	0.000539186	MRPS36	0.000585501	postnatal	Small Subunit of Mitochondrial Ribosome	Forebrain/Cerebrum	prenatal vs postnatal	human
1173.42	0.439779	0.2353	1.86901	0.0616212	0.0993252	MRPS9	0.0880303	postnatal	Small Subunit of Mitochondrial Ribosome	Forebrain/Cerebrum	prenatal vs postnatal	human
2579.34	0.159006	0.124698	1.27513	0.202263	0.276481	MRPS5	0.275813	postnatal	Small Subunit of Mitochondrial Ribosome	Forebrain/Cerebrum	prenatal vs postnatal	human
104.215	0.626467	0.19423	3.22538	0.00125805	0.00299226	MRPS28	0.00235885	postnatal	Small Subunit of Mitochondrial Ribosome	Forebrain/Cerebrum	prenatal vs postnatal	human
816.53	0.901937	0.177535	5.08033	3.76778288285539e-07	1.58922263473889e-06	MRPS18C	1.88389144142769e-06	postnatal	Small Subunit of Mitochondrial Ribosome	Forebrain/Cerebrum	prenatal vs postnatal	human
1165.37	0.422902	0.14644	2.88789	0.00387835	0.00835799	MRPS22	0.00684416	postnatal	Small Subunit of Mitochondrial Ribosome	Forebrain/Cerebrum	prenatal vs postnatal	human
1921.73	0.798626	0.128826	6.19927	5.67238839796926e-10	3.54260511776203e-09	MRPS23	4.25429129847694e-09	postnatal	Small Subunit of Mitochondrial Ribosome	Forebrain/Cerebrum	prenatal vs postnatal	human
1441.18	0.615288	0.148043	4.15614	3.2367102880141e-05	0.000101892	MRPS11	0.000121377	postnatal	Small Subunit of Mitochondrial Ribosome	Forebrain/Cerebrum	prenatal vs postnatal	human
2485.17	-0.454958	0.120936	-3.76197	0.000168579	0.000470957	MRPS16	0.000561931	prenatal	Small Subunit of Mitochondrial Ribosome	Forebrain/Cerebrum	prenatal vs postnatal	human
487.259	0.481113	0.141394	3.40264	0.000667391	0.00167052	MRPS18B	0.00143012	postnatal	Small Subunit of Mitochondrial Ribosome	Forebrain/Cerebrum	prenatal vs postnatal	human
402.298	0.632409	0.180439	3.50484	0.000456876	0.00117975	MRPS17	0.00105433	postnatal	Small Subunit of Mitochondrial Ribosome	Forebrain/Cerebrum	prenatal vs postnatal	human
1863.38	0.00657233	0.200102	0.032845	0.973798	0.98069	MRPS6	0.973798	postnatal	Small Subunit of Mitochondrial Ribosome	Forebrain/Cerebrum	prenatal vs postnatal	human
3794.32	0.827946	0.122047	6.78381	1.17045200612652e-11	9.14930362309311e-11	MRPS21	3.0094993003476e-10	postnatal	Small Subunit of Mitochondrial Ribosome	Forebrain/Cerebrum	prenatal vs postnatal	human
1688.84	0.154625	0.163074	0.94819	0.343033	0.430487	MRPL43	0.401599	postnatal	Large Subunit of Mitochondrial Ribosome	Forebrain/Cerebrum	prenatal vs postnatal	human
810.171	0.107632	0.168829	0.63752	0.523786	0.606463	MRPL22	0.584691	postnatal	Large Subunit of Mitochondrial Ribosome	Forebrain/Cerebrum	prenatal vs postnatal	human
2516.31	1.07562	0.197028	5.4592	4.78281000680271e-08	2.29975051075289e-07	MRPL28	1.91312400272108e-07	postnatal	Large Subunit of Mitochondrial Ribosome	Forebrain/Cerebrum	prenatal vs postnatal	human
509.006	-0.130693	0.164826	-0.792912	0.427829	0.514787	LACTB	0.488948	prenatal	Large Subunit of Mitochondrial Ribosome	Forebrain/Cerebrum	prenatal vs postnatal	human
1493.69	0.590056	0.153996	3.83164	0.00012729	0.000363805	MRPL4	0.00026565	postnatal	Large Subunit of Mitochondrial Ribosome	Forebrain/Cerebrum	prenatal vs postnatal	human
1428.49	0.23851	0.138572	1.72119	0.0852159	0.131716	MRPL32	0.127824	postnatal	Large Subunit of Mitochondrial Ribosome	Forebrain/Cerebrum	prenatal vs postnatal	human
1396.15	0.630085	0.163233	3.86003	0.000113374	0.000326748	MRPL27	0.00024736	postnatal	Large Subunit of Mitochondrial Ribosome	Forebrain/Cerebrum	prenatal vs postnatal	human
2318.69	0.456991	0.221764	2.06071	0.0393306	0.0669719	MRPL51	0.0674239	postnatal	Large Subunit of Mitochondrial Ribosome	Forebrain/Cerebrum	prenatal vs postnatal	human
2007.93	1.05791	0.185389	5.70644	1.15365900171734e-08	6.05584851700702e-08	MRPL18	5.30650842442206e-08	postnatal	Large Subunit of Mitochondrial Ribosome	Forebrain/Cerebrum	prenatal vs postnatal	human
895.723	1.18691	0.188219	6.30602	2.86302701150117e-10	1.86240094061169e-09	MRPL2	3.02228285498748e-09	postnatal	Large Subunit of Mitochondrial Ribosome	Forebrain/Cerebrum	prenatal vs postnatal	human
3017.13	-0.230011	0.130179	-1.76689	0.0772471	0.120944	MRPL3	0.119608	prenatal	Large Subunit of Mitochondrial Ribosome	Forebrain/Cerebrum	prenatal vs postnatal	human
1112.83	-0.0753484	0.212982	-0.353779	0.723505	0.783056	MRPL19	0.771738	prenatal	Large Subunit of Mitochondrial Ribosome	Forebrain/Cerebrum	prenatal vs postnatal	human
2334.48	0.306313	0.141118	2.17061	0.0299604	0.0527258	MRPL37	0.053263	postnatal	Large Subunit of Mitochondrial Ribosome	Forebrain/Cerebrum	prenatal vs postnatal	human
879.868	1.35033	0.171099	7.89207	2.97205030441076e-15	3.7177376013818e-14	MRPL34	7.13292073058583e-14	postnatal	Large Subunit of Mitochondrial Ribosome	Forebrain/Cerebrum	prenatal vs postnatal	human
2022.07	0.846675	0.139773	6.05752	1.38239069977456e-09	8.20483886237597e-09	MRPL35	9.47925051273986e-09	postnatal	Large Subunit of Mitochondrial Ribosome	Forebrain/Cerebrum	prenatal vs postnatal	human
1465.37	-0.454732	0.103908	-4.3763	1.20712946692331e-05	4.06045500483717e-05	MRPL44	3.21901191179549e-05	prenatal	Large Subunit of Mitochondrial Ribosome	Forebrain/Cerebrum	prenatal vs postnatal	human
1208.8	0.00328275	0.151188	0.021713	0.982677	0.987335	MRPL47	0.982677	postnatal	Large Subunit of Mitochondrial Ribosome	Forebrain/Cerebrum	prenatal vs postnatal	human
1258.58	-0.126829	0.0996752	-1.27242	0.203224	0.277629	MRPL50	0.256703	prenatal	Large Subunit of Mitochondrial Ribosome	Forebrain/Cerebrum	prenatal vs postnatal	human
1495.38	0.203568	0.13477	1.51049	0.130918	0.191052	MRPL15	0.184826	postnatal	Large Subunit of Mitochondrial Ribosome	Forebrain/Cerebrum	prenatal vs postnatal	human
1463.21	1.18874	0.162839	7.30012	2.87500925314046e-13	2.74494493676835e-12	MRPL24	4.60001480502473e-12	postnatal	Large Subunit of Mitochondrial Ribosome	Forebrain/Cerebrum	prenatal vs postnatal	human
1743.81	0.0470019	0.148731	0.31602	0.751987	0.806705	MRPL9	0.784683	postnatal	Large Subunit of Mitochondrial Ribosome	Forebrain/Cerebrum	prenatal vs postnatal	human
1715.38	0.238594	0.11668	2.04487	0.0408681	0.0693134	MRPL49	0.0676438	postnatal	Large Subunit of Mitochondrial Ribosome	Forebrain/Cerebrum	prenatal vs postnatal	human
739.39	-0.15566	0.144425	-1.0778	0.281125	0.36476	MRPL39	0.33735	prenatal	Large Subunit of Mitochondrial Ribosome	Forebrain/Cerebrum	prenatal vs postnatal	human
919.209	0.656693	0.135756	4.83731	1.31607240887753e-06	5.1310512546505e-06	MRPL17	4.2114317084081e-06	postnatal	Large Subunit of Mitochondrial Ribosome	Forebrain/Cerebrum	prenatal vs postnatal	human
1606.43	0.498528	0.11839	4.21088	2.54374012499659e-05	8.15022299725508e-05	MRPL10	6.10497629999181e-05	postnatal	Large Subunit of Mitochondrial Ribosome	Forebrain/Cerebrum	prenatal vs postnatal	human
980.261	1.04228	0.20044	5.19995	1.99342193981391e-07	8.76953058286456e-07	MRPL55	6.83458950793341e-07	postnatal	Large Subunit of Mitochondrial Ribosome	Forebrain/Cerebrum	prenatal vs postnatal	human
1248	0.659494	0.12671	5.20476	1.94251868650607e-07	8.56324360931516e-07	MRPL16	6.83458950793341e-07	postnatal	Large Subunit of Mitochondrial Ribosome	Forebrain/Cerebrum	prenatal vs postnatal	human
1122.32	0.226816	0.142723	1.58921	0.112014	0.16717	MRPL1	0.162929	postnatal	Large Subunit of Mitochondrial Ribosome	Forebrain/Cerebrum	prenatal vs postnatal	human
565.772	0.872782	0.153188	5.69746	1.21607484726339e-08	6.36002462996484e-08	MRPL36	5.30650842442206e-08	postnatal	Large Subunit of Mitochondrial Ribosome	Forebrain/Cerebrum	prenatal vs postnatal	human
856.207	-0.353121	0.188748	-1.87086	0.0613643	0.0989591	MRPL13	0.0981829	prenatal	Large Subunit of Mitochondrial Ribosome	Forebrain/Cerebrum	prenatal vs postnatal	human
1175.28	-0.147494	0.135338	-1.08982	0.275791	0.359289	MRPL52	0.33735	prenatal	Large Subunit of Mitochondrial Ribosome	Forebrain/Cerebrum	prenatal vs postnatal	human
1044.97	-0.643418	0.207899	-3.09486	0.00196908	0.00449672	MRPL11	0.00378064	prenatal	Large Subunit of Mitochondrial Ribosome	Forebrain/Cerebrum	prenatal vs postnatal	human
975.189	0.493454	0.154974	3.1841	0.00145205	0.00340632	MRPL48	0.0029041	postnatal	Large Subunit of Mitochondrial Ribosome	Forebrain/Cerebrum	prenatal vs postnatal	human
779.755	0.233074	0.176512	1.32044	0.186687	0.258392	MRPL14	0.242188	postnatal	Large Subunit of Mitochondrial Ribosome	Forebrain/Cerebrum	prenatal vs postnatal	human
1526.27	1.89273	0.300848	6.2913	3.14821130727863e-10	2.03682932900443e-09	MRPL41	3.02228285498748e-09	postnatal	Large Subunit of Mitochondrial Ribosome	Forebrain/Cerebrum	prenatal vs postnatal	human
790.636	1.17701	0.19769	5.9538	2.61981631276688e-09	1.49552226725359e-08	MRPL54	1.397235366809e-08	postnatal	Large Subunit of Mitochondrial Ribosome	Forebrain/Cerebrum	prenatal vs postnatal	human
1249.71	-0.211555	0.149323	-1.41676	0.156554	0.222698	MRPL30	0.213673	prenatal	Large Subunit of Mitochondrial Ribosome	Forebrain/Cerebrum	prenatal vs postnatal	human
810.006	0.732601	0.157427	4.65358	3.26219911350435e-06	1.20014229112353e-05	MRPL40	9.21091514401229e-06	postnatal	Large Subunit of Mitochondrial Ribosome	Forebrain/Cerebrum	prenatal vs postnatal	human
1395.07	0.777168	0.184417	4.21419	2.50679207648679e-05	8.04189647277923e-05	MRPL21	6.10497629999181e-05	postnatal	Large Subunit of Mitochondrial Ribosome	Forebrain/Cerebrum	prenatal vs postnatal	human
2938.73	-1.14615	0.119969	-9.55368	1.25172136134606e-21	3.35183164538222e-20	MRPL42	6.00826253446107e-20	prenatal	Large Subunit of Mitochondrial Ribosome	Forebrain/Cerebrum	prenatal vs postnatal	human
213.051	-0.680875	0.166457	-4.09039	4.30642319574369e-05	0.000132624	MRPL38	9.84325301884273e-05	prenatal	Large Subunit of Mitochondrial Ribosome	Forebrain/Cerebrum	prenatal vs postnatal	human
110.43	-0.893009	0.145257	-6.14778	7.85724417358344e-10	4.81653097196651e-09	MRPL53	6.28579533886675e-09	prenatal	Large Subunit of Mitochondrial Ribosome	Forebrain/Cerebrum	prenatal vs postnatal	human
188.495	0.0766938	0.262397	0.292281	0.770072	0.821505	MRPL23	0.786456	postnatal	Large Subunit of Mitochondrial Ribosome	Forebrain/Cerebrum	prenatal vs postnatal	human
1970.66	0.781548	0.165226	4.73016	2.24338974642258e-06	8.45522249742622e-06	MRPL20	6.73016923926775e-06	postnatal	Large Subunit of Mitochondrial Ribosome	Forebrain/Cerebrum	prenatal vs postnatal	human
1458.38	1.24855	0.20712	6.02816	1.65836527275601e-09	9.70975466517253e-09	MRPL33	9.95019163653605e-09	postnatal	Large Subunit of Mitochondrial Ribosome	Forebrain/Cerebrum	prenatal vs postnatal	human
308.437	-0.215716	0.15362	-1.40422	0.160255	0.227163	MRPL46	0.213673	prenatal	Large Subunit of Mitochondrial Ribosome	Forebrain/Cerebrum	prenatal vs postnatal	human
265.788	-0.147828	0.350796	-0.421407	0.673458	0.740975	MRPL12	0.734682	prenatal	Large Subunit of Mitochondrial Ribosome	Forebrain/Cerebrum	prenatal vs postnatal	human
346.685	-0.540782	0.196506	-2.75199	0.00592352	0.0122504	MRPL45	0.0109357	prenatal	Large Subunit of Mitochondrial Ribosome	Forebrain/Cerebrum	prenatal vs postnatal	human
1189.3	0.315685	0.134073	2.35458	0.0185436	0.0342199	MRPS10	0.0321423	postnatal	Mitochondrial Ribosome	Forebrain/Cerebrum	prenatal vs postnatal	human
1688.84	0.154625	0.163074	0.94819	0.343033	0.430487	MRPL43	0.411639	postnatal	Mitochondrial Ribosome	Forebrain/Cerebrum	prenatal vs postnatal	human
1794.29	0.0757758	0.108824	0.696318	0.48623	0.570808	MRPS35	0.549651	postnatal	Mitochondrial Ribosome	Forebrain/Cerebrum	prenatal vs postnatal	human
10.921	0.387083	0.348788	1.10979	0.267087	0.349794	MRPS24	0.341522	postnatal	Mitochondrial Ribosome	Forebrain/Cerebrum	prenatal vs postnatal	human
1776.27	0.151655	0.202816	0.747746	0.454613	0.540529	MRPS34	0.52338	postnatal	Mitochondrial Ribosome	Forebrain/Cerebrum	prenatal vs postnatal	human
810.171	0.107632	0.168829	0.63752	0.523786	0.606463	MRPL22	0.583647	postnatal	Mitochondrial Ribosome	Forebrain/Cerebrum	prenatal vs postnatal	human
2516.31	1.07562	0.197028	5.4592	4.78281000680271e-08	2.29975051075289e-07	MRPL28	2.19446576782713e-07	postnatal	Mitochondrial Ribosome	Forebrain/Cerebrum	prenatal vs postnatal	human
1244.48	0.962877	0.143594	6.70556	2.0063328668984e-11	1.52250686880466e-10	MRPS33	3.12987927236151e-10	postnatal	Mitochondrial Ribosome	Forebrain/Cerebrum	prenatal vs postnatal	human
931.42	1.07924	0.193737	5.57064	2.53806908102157e-08	1.27261168485317e-07	MRPS18A	1.23730867699802e-07	postnatal	Mitochondrial Ribosome	Forebrain/Cerebrum	prenatal vs postnatal	human
917.34	-0.48277	0.131303	-3.67678	0.000236199	0.000642272	MRPS31	0.000541868	prenatal	Mitochondrial Ribosome	Forebrain/Cerebrum	prenatal vs postnatal	human
509.006	-0.130693	0.164826	-0.792912	0.427829	0.514787	LACTB	0.505616	prenatal	Mitochondrial Ribosome	Forebrain/Cerebrum	prenatal vs postnatal	human
1493.69	0.590056	0.153996	3.83164	0.00012729	0.000363805	MRPL4	0.000320279	postnatal	Mitochondrial Ribosome	Forebrain/Cerebrum	prenatal vs postnatal	human
1428.49	0.23851	0.138572	1.72119	0.0852159	0.131716	MRPL32	0.125412	postnatal	Mitochondrial Ribosome	Forebrain/Cerebrum	prenatal vs postnatal	human
1396.15	0.630085	0.163233	3.86003	0.000113374	0.000326748	MRPL27	0.000294771	postnatal	Mitochondrial Ribosome	Forebrain/Cerebrum	prenatal vs postnatal	human
2318.69	0.456991	0.221764	2.06071	0.0393306	0.0669719	MRPL51	0.0639123	postnatal	Mitochondrial Ribosome	Forebrain/Cerebrum	prenatal vs postnatal	human
2007.93	1.05791	0.185389	5.70644	1.15365900171734e-08	6.05584851700702e-08	MRPL18	6.32358920576962e-08	postnatal	Mitochondrial Ribosome	Forebrain/Cerebrum	prenatal vs postnatal	human
895.723	1.18691	0.188219	6.30602	2.86302701150117e-10	1.86240094061169e-09	MRPL2	3.06950602459666e-09	postnatal	Mitochondrial Ribosome	Forebrain/Cerebrum	prenatal vs postnatal	human
1765.91	0.0391322	0.173748	0.225223	0.821805	0.864474	MRPS30	0.843432	postnatal	Mitochondrial Ribosome	Forebrain/Cerebrum	prenatal vs postnatal	human
3379.12	-0.120595	0.203255	-0.593318	0.552968	0.633187	MRPS27	0.607486	prenatal	Mitochondrial Ribosome	Forebrain/Cerebrum	prenatal vs postnatal	human
3017.13	-0.230011	0.130179	-1.76689	0.0772471	0.120944	MRPL3	0.115871	prenatal	Mitochondrial Ribosome	Forebrain/Cerebrum	prenatal vs postnatal	human
1112.83	-0.0753484	0.212982	-0.353779	0.723505	0.783056	MRPL19	0.77306	prenatal	Mitochondrial Ribosome	Forebrain/Cerebrum	prenatal vs postnatal	human
2334.48	0.306313	0.141118	2.17061	0.0299604	0.0527258	MRPL37	0.0508024	postnatal	Mitochondrial Ribosome	Forebrain/Cerebrum	prenatal vs postnatal	human
1505.96	0.74972	0.172126	4.35566	1.32666585628304e-05	4.43766313512005e-05	MRPS15	4.1391974716031e-05	postnatal	Mitochondrial Ribosome	Forebrain/Cerebrum	prenatal vs postnatal	human
1217.51	0.231258	0.085869	2.69315	0.00707811	0.0143787	MRPS14	0.0125476	postnatal	Mitochondrial Ribosome	Forebrain/Cerebrum	prenatal vs postnatal	human
1661.06	-0.223463	0.225671	-0.990215	0.322069	0.408328	MRPS2	0.392521	prenatal	Mitochondrial Ribosome	Forebrain/Cerebrum	prenatal vs postnatal	human
1840.22	0.537469	0.166127	3.2353	0.00121517	0.00289979	MRPS7	0.00249429	postnatal	Mitochondrial Ribosome	Forebrain/Cerebrum	prenatal vs postnatal	human
1654.79	0.339829	0.162257	2.09439	0.0362249	0.0622869	MRPS26	0.060118	postnatal	Mitochondrial Ribosome	Forebrain/Cerebrum	prenatal vs postnatal	human
65.431	1.3168	0.205919	6.39476	1.60798566445371e-10	1.08496372988338e-09	MRPS12	2.09038136378983e-09	postnatal	Mitochondrial Ribosome	Forebrain/Cerebrum	prenatal vs postnatal	human
879.868	1.35033	0.171099	7.89207	2.97205030441076e-15	3.7177376013818e-14	MRPL34	1.1590996187202e-13	postnatal	Mitochondrial Ribosome	Forebrain/Cerebrum	prenatal vs postnatal	human
3377.15	0.470158	0.132995	3.53515	0.000407541	0.00106147	MRPS25	0.000908233	postnatal	Mitochondrial Ribosome	Forebrain/Cerebrum	prenatal vs postnatal	human
2022.07	0.846675	0.139773	6.05752	1.38239069977456e-09	8.20483886237597e-09	MRPL35	9.80240678021962e-09	postnatal	Mitochondrial Ribosome	Forebrain/Cerebrum	prenatal vs postnatal	human
2650.92	-0.0730313	0.0980304	-0.744987	0.45628	0.542082	DAP3	0.52338	prenatal	Mitochondrial Ribosome	Forebrain/Cerebrum	prenatal vs postnatal	human
401.441	0.631652	0.169562	3.72519	0.000195167	0.000539186	MRPS36	0.000461304	postnatal	Mitochondrial Ribosome	Forebrain/Cerebrum	prenatal vs postnatal	human
1465.37	-0.454732	0.103908	-4.3763	1.20712946692331e-05	4.06045500483717e-05	MRPL44	3.92317076750075e-05	prenatal	Mitochondrial Ribosome	Forebrain/Cerebrum	prenatal vs postnatal	human
1173.42	0.439779	0.2353	1.86901	0.0616212	0.0993252	MRPS9	0.0942442	postnatal	Mitochondrial Ribosome	Forebrain/Cerebrum	prenatal vs postnatal	human
1208.8	0.00328275	0.151188	0.021713	0.982677	0.987335	MRPL47	0.982677	postnatal	Mitochondrial Ribosome	Forebrain/Cerebrum	prenatal vs postnatal	human
1258.58	-0.126829	0.0996752	-1.27242	0.203224	0.277629	MRPL50	0.264191	prenatal	Mitochondrial Ribosome	Forebrain/Cerebrum	prenatal vs postnatal	human
1495.38	0.203568	0.13477	1.51049	0.130918	0.191052	MRPL15	0.185666	postnatal	Mitochondrial Ribosome	Forebrain/Cerebrum	prenatal vs postnatal	human
1463.21	1.18874	0.162839	7.30012	2.87500925314046e-13	2.74494493676835e-12	MRPL24	7.47502405816519e-12	postnatal	Mitochondrial Ribosome	Forebrain/Cerebrum	prenatal vs postnatal	human
1743.81	0.0470019	0.148731	0.31602	0.751987	0.806705	MRPL9	0.792635	postnatal	Mitochondrial Ribosome	Forebrain/Cerebrum	prenatal vs postnatal	human
2579.34	0.159006	0.124698	1.27513	0.202263	0.276481	MRPS5	0.264191	postnatal	Mitochondrial Ribosome	Forebrain/Cerebrum	prenatal vs postnatal	human
104.215	0.626467	0.19423	3.22538	0.00125805	0.00299226	MRPS28	0.0025161	postnatal	Mitochondrial Ribosome	Forebrain/Cerebrum	prenatal vs postnatal	human
1715.38	0.238594	0.11668	2.04487	0.0408681	0.0693134	MRPL49	0.0650554	postnatal	Mitochondrial Ribosome	Forebrain/Cerebrum	prenatal vs postnatal	human
739.39	-0.15566	0.144425	-1.0778	0.281125	0.36476	MRPL39	0.34806	prenatal	Mitochondrial Ribosome	Forebrain/Cerebrum	prenatal vs postnatal	human
919.209	0.656693	0.135756	4.83731	1.31607240887753e-06	5.1310512546505e-06	MRPL17	4.8882689472594e-06	postnatal	Mitochondrial Ribosome	Forebrain/Cerebrum	prenatal vs postnatal	human
1606.43	0.498528	0.11839	4.21088	2.54374012499659e-05	8.15022299725508e-05	MRPL10	7.34858258332348e-05	postnatal	Mitochondrial Ribosome	Forebrain/Cerebrum	prenatal vs postnatal	human
980.261	1.04228	0.20044	5.19995	1.99342193981391e-07	8.76953058286456e-07	MRPL55	8.18352164765712e-07	postnatal	Mitochondrial Ribosome	Forebrain/Cerebrum	prenatal vs postnatal	human
816.53	0.901937	0.177535	5.08033	3.76778288285539e-07	1.58922263473889e-06	MRPS18C	1.4694353243136e-06	postnatal	Mitochondrial Ribosome	Forebrain/Cerebrum	prenatal vs postnatal	human
1248	0.659494	0.12671	5.20476	1.94251868650607e-07	8.56324360931516e-07	MRPL16	8.18352164765712e-07	postnatal	Mitochondrial Ribosome	Forebrain/Cerebrum	prenatal vs postnatal	human
1122.32	0.226816	0.142723	1.58921	0.112014	0.16717	MRPL1	0.161798	postnatal	Mitochondrial Ribosome	Forebrain/Cerebrum	prenatal vs postnatal	human
565.772	0.872782	0.153188	5.69746	1.21607484726339e-08	6.36002462996484e-08	MRPL36	6.32358920576962e-08	postnatal	Mitochondrial Ribosome	Forebrain/Cerebrum	prenatal vs postnatal	human
856.207	-0.353121	0.188748	-1.87086	0.0613643	0.0989591	MRPL13	0.0942442	prenatal	Mitochondrial Ribosome	Forebrain/Cerebrum	prenatal vs postnatal	human
1175.28	-0.147494	0.135338	-1.08982	0.275791	0.359289	MRPL52	0.346963	prenatal	Mitochondrial Ribosome	Forebrain/Cerebrum	prenatal vs postnatal	human
1044.97	-0.643418	0.207899	-3.09486	0.00196908	0.00449672	MRPL11	0.00374606	prenatal	Mitochondrial Ribosome	Forebrain/Cerebrum	prenatal vs postnatal	human
1165.37	0.422902	0.14644	2.88789	0.00387835	0.00835799	MRPS22	0.00720266	postnatal	Mitochondrial Ribosome	Forebrain/Cerebrum	prenatal vs postnatal	human
975.189	0.493454	0.154974	3.1841	0.00145205	0.00340632	MRPL48	0.0028315	postnatal	Mitochondrial Ribosome	Forebrain/Cerebrum	prenatal vs postnatal	human
779.755	0.233074	0.176512	1.32044	0.186687	0.258392	MRPL14	0.251062	postnatal	Mitochondrial Ribosome	Forebrain/Cerebrum	prenatal vs postnatal	human
1921.73	0.798626	0.128826	6.19927	5.67238839796926e-10	3.54260511776203e-09	MRPS23	4.91606994490669e-09	postnatal	Mitochondrial Ribosome	Forebrain/Cerebrum	prenatal vs postnatal	human
1441.18	0.615288	0.148043	4.15614	3.2367102880141e-05	0.000101892	MRPS11	9.01655008803928e-05	postnatal	Mitochondrial Ribosome	Forebrain/Cerebrum	prenatal vs postnatal	human
1526.27	1.89273	0.300848	6.2913	3.14821130727863e-10	2.03682932900443e-09	MRPL41	3.06950602459666e-09	postnatal	Mitochondrial Ribosome	Forebrain/Cerebrum	prenatal vs postnatal	human
2485.17	-0.454958	0.120936	-3.76197	0.000168579	0.000470957	MRPS16	0.000410912	prenatal	Mitochondrial Ribosome	Forebrain/Cerebrum	prenatal vs postnatal	human
790.636	1.17701	0.19769	5.9538	2.61981631276688e-09	1.49552226725359e-08	MRPL54	1.57188978766013e-08	postnatal	Mitochondrial Ribosome	Forebrain/Cerebrum	prenatal vs postnatal	human
1249.71	-0.211555	0.149323	-1.41676	0.156554	0.222698	MRPL30	0.218057	prenatal	Mitochondrial Ribosome	Forebrain/Cerebrum	prenatal vs postnatal	human
810.006	0.732601	0.157427	4.65358	3.26219911350435e-06	1.20014229112353e-05	MRPL40	1.10631100371017e-05	postnatal	Mitochondrial Ribosome	Forebrain/Cerebrum	prenatal vs postnatal	human
1395.07	0.777168	0.184417	4.21419	2.50679207648679e-05	8.04189647277923e-05	MRPL21	7.34858258332348e-05	postnatal	Mitochondrial Ribosome	Forebrain/Cerebrum	prenatal vs postnatal	human
2938.73	-1.14615	0.119969	-9.55368	1.25172136134606e-21	3.35183164538222e-20	MRPL42	9.76342661849924e-20	prenatal	Mitochondrial Ribosome	Forebrain/Cerebrum	prenatal vs postnatal	human
213.051	-0.680875	0.166457	-4.09039	4.30642319574369e-05	0.000132624	MRPL38	0.000115828	prenatal	Mitochondrial Ribosome	Forebrain/Cerebrum	prenatal vs postnatal	human
487.259	0.481113	0.141394	3.40264	0.000667391	0.00167052	MRPS18B	0.00140693	postnatal	Mitochondrial Ribosome	Forebrain/Cerebrum	prenatal vs postnatal	human
110.43	-0.893009	0.145257	-6.14778	7.85724417358344e-10	4.81653097196651e-09	MRPL53	6.12865045539508e-09	prenatal	Mitochondrial Ribosome	Forebrain/Cerebrum	prenatal vs postnatal	human
188.495	0.0766938	0.262397	0.292281	0.770072	0.821505	MRPL23	0.800875	postnatal	Mitochondrial Ribosome	Forebrain/Cerebrum	prenatal vs postnatal	human
402.298	0.632409	0.180439	3.50484	0.000456876	0.00117975	MRPS17	0.000989897	postnatal	Mitochondrial Ribosome	Forebrain/Cerebrum	prenatal vs postnatal	human
1970.66	0.781548	0.165226	4.73016	2.24338974642258e-06	8.45522249742622e-06	MRPL20	7.95383637368007e-06	postnatal	Mitochondrial Ribosome	Forebrain/Cerebrum	prenatal vs postnatal	human
1458.38	1.24855	0.20712	6.02816	1.65836527275601e-09	9.70975466517253e-09	MRPL33	1.07793742729141e-08	postnatal	Mitochondrial Ribosome	Forebrain/Cerebrum	prenatal vs postnatal	human
1863.38	0.00657233	0.200102	0.032845	0.973798	0.98069	MRPS6	0.982677	postnatal	Mitochondrial Ribosome	Forebrain/Cerebrum	prenatal vs postnatal	human
308.437	-0.215716	0.15362	-1.40422	0.160255	0.227163	MRPL46	0.219296	prenatal	Mitochondrial Ribosome	Forebrain/Cerebrum	prenatal vs postnatal	human
265.788	-0.147828	0.350796	-0.421407	0.673458	0.740975	MRPL12	0.72958	prenatal	Mitochondrial Ribosome	Forebrain/Cerebrum	prenatal vs postnatal	human
3794.32	0.827946	0.122047	6.78381	1.17045200612652e-11	9.14930362309311e-11	MRPS21	2.28238141194672e-10	postnatal	Mitochondrial Ribosome	Forebrain/Cerebrum	prenatal vs postnatal	human
346.685	-0.540782	0.196506	-2.75199	0.00592352	0.0122504	MRPL45	0.010745	prenatal	Mitochondrial Ribosome	Forebrain/Cerebrum	prenatal vs postnatal	human
909.576	0.0292882	0.135268	0.21652	0.828583	0.87001	NDUFAF7	0.834465	postnatal	All OXPHOS	Forebrain/Cerebrum	prenatal vs postnatal	human
2291.46	0.805529	0.172515	4.66934	3.02169110607524e-06	1.11730038374106e-05	NDUFAB1	5.38868247250084e-06	postnatal	All OXPHOS	Forebrain/Cerebrum	prenatal vs postnatal	human
549.262	-0.320177	0.153354	-2.08783	0.0368132	0.063193	COX10	0.0442586	prenatal	All OXPHOS	Forebrain/Cerebrum	prenatal vs postnatal	human
6243.76	0.560473	0.185792	3.01667	0.0025557	0.00571323	UQCRC1	0.00350589	postnatal	All OXPHOS	Forebrain/Cerebrum	prenatal vs postnatal	human
1686.64	-0.522384	0.145738	-3.58439	0.000337865	0.000892886	COX15	0.000502105	prenatal	All OXPHOS	Forebrain/Cerebrum	prenatal vs postnatal	human
1377.75	0.587519	0.234186	2.50877	0.0121153	0.0233855	NDUFS1	0.0154326	postnatal	All OXPHOS	Forebrain/Cerebrum	prenatal vs postnatal	human
2964.64	0.745241	0.161216	4.62263	3.78907580511146e-06	1.37903716185545e-05	NDUFB4	6.43541446264962e-06	postnatal	All OXPHOS	Forebrain/Cerebrum	prenatal vs postnatal	human
4188.22	0.956243	0.158701	6.02546	1.68634162036181e-09	9.86582478130234e-09	SDHA	4.87671765888415e-09	postnatal	All OXPHOS	Forebrain/Cerebrum	prenatal vs postnatal	human
1175.76	-0.263694	0.123005	-2.14376	0.0320518	0.0559092	BCS1L	0.0389721	prenatal	All OXPHOS	Forebrain/Cerebrum	prenatal vs postnatal	human
2803.64	1.35326	0.176832	7.65282	1.96618446531294e-14	2.18510437193796e-13	NDUFB2	9.56280626311292e-14	postnatal	All OXPHOS	Forebrain/Cerebrum	prenatal vs postnatal	human
1963.73	1.07564	0.228911	4.69893	2.61525462624927e-06	9.77172658800117e-06	NDUFB7	4.74291940692665e-06	postnatal	All OXPHOS	Forebrain/Cerebrum	prenatal vs postnatal	human
2408.85	0.900049	0.122304	7.35912	1.8512816305348e-13	1.81508202909783e-12	UQCC1	7.07454051668656e-13	postnatal	All OXPHOS	Forebrain/Cerebrum	prenatal vs postnatal	human
1221.66	0.384712	0.165581	2.3234	0.0201575	0.0369086	NDUFAF5	0.0250796	postnatal	All OXPHOS	Forebrain/Cerebrum	prenatal vs postnatal	human
2048.74	-0.0916566	0.186423	-0.49166	0.622959	0.696961	COA1	0.666567	prenatal	All OXPHOS	Forebrain/Cerebrum	prenatal vs postnatal	human
1506.08	1.115	0.133197	8.37106	5.71041684338596e-17	8.73337241288362e-16	NDUFC1	3.59420354260175e-16	postnatal	All OXPHOS	Forebrain/Cerebrum	prenatal vs postnatal	human
2227.75	0.328515	0.149353	2.19959	0.027836	0.0493446	FOXRED1	0.0342351	postnatal	All OXPHOS	Forebrain/Cerebrum	prenatal vs postnatal	human
2025.74	0.585722	0.201728	2.90352	0.00368996	0.00798645	NDUFS8	0.0049978	postnatal	All OXPHOS	Forebrain/Cerebrum	prenatal vs postnatal	human
3449.03	1.83618	0.189716	9.67855	3.71955766046334e-22	1.06368670933289e-20	COX6A1	6.63321116115963e-21	postnatal	All OXPHOS	Forebrain/Cerebrum	prenatal vs postnatal	human
4963.76	1.00787	0.178539	5.64513	1.65054645513023e-08	8.4663457372317e-08	COX7A2	3.75762703614755e-08	postnatal	All OXPHOS	Forebrain/Cerebrum	prenatal vs postnatal	human
1675.45	0.395008	0.143102	2.76032	0.00577441	0.0119735	TIMMDC1	0.0075349	postnatal	All OXPHOS	Forebrain/Cerebrum	prenatal vs postnatal	human
2227.96	0.641067	0.26971	2.37688	0.01746	0.0324184	NDUFS7	0.021979	postnatal	All OXPHOS	Forebrain/Cerebrum	prenatal vs postnatal	human
4313.96	0.472153	0.133225	3.54402	0.000394074	0.0010296	COX7A2L	0.000577616	postnatal	All OXPHOS	Forebrain/Cerebrum	prenatal vs postnatal	human
2119.82	1.2897	0.139326	9.25676	2.10734563872933e-20	4.84803056718918e-19	SDHB	1.73450756418491e-19	postnatal	All OXPHOS	Forebrain/Cerebrum	prenatal vs postnatal	human
1330.36	1.30717	0.173782	7.52187	5.39988838269055e-14	5.65616068798894e-13	NDUFB3	2.31115222779156e-13	postnatal	All OXPHOS	Forebrain/Cerebrum	prenatal vs postnatal	human
2440.92	1.54546	0.184204	8.38994	4.86372175749764e-17	7.49600108308713e-16	NDUFA8	3.25261392532654e-16	postnatal	All OXPHOS	Forebrain/Cerebrum	prenatal vs postnatal	human
4005.77	1.01197	0.205727	4.91896	8.70030823093275e-07	3.48338707359585e-06	ATPAF1	1.63321575563124e-06	postnatal	All OXPHOS	Forebrain/Cerebrum	prenatal vs postnatal	human
1614.57	1.20476	0.200134	6.01977	1.74668669396348e-09	1.02068801647252e-08	NDUFAF4	4.91830200668663e-09	postnatal	All OXPHOS	Forebrain/Cerebrum	prenatal vs postnatal	human
3172.58	1.99811	0.181422	11.0136	3.28461597940363e-28	1.93604465342206e-26	NDUFA1	1.75726954898094e-26	postnatal	All OXPHOS	Forebrain/Cerebrum	prenatal vs postnatal	human
5445.85	1.38018	0.177394	7.78033	7.23384574715054e-15	8.53102787323783e-14	COX6B1	3.68581664259575e-14	postnatal	All OXPHOS	Forebrain/Cerebrum	prenatal vs postnatal	human
7821.58	0.752863	0.132945	5.66298	1.48766302558283e-08	7.68625896551129e-08	COX7C	3.53733208305251e-08	postnatal	All OXPHOS	Forebrain/Cerebrum	prenatal vs postnatal	human
933.8	1.03039	0.166555	6.18648	6.15223489736004e-10	3.82629318777747e-09	UQCR11	1.88082609719293e-09	postnatal	All OXPHOS	Forebrain/Cerebrum	prenatal vs postnatal	human
6132.46	1.20896	0.154988	7.80037	6.17249721293372e-15	7.35482084175883e-14	NDUFA5	3.30228600891954e-14	postnatal	All OXPHOS	Forebrain/Cerebrum	prenatal vs postnatal	human
1826.06	0.398777	0.204141	1.95344	0.0507673	0.0838332	ECSIT	0.0596934	postnatal	All OXPHOS	Forebrain/Cerebrum	prenatal vs postnatal	human
5743.07	0.747868	0.141397	5.28912	1.22904261818907e-07	5.5835678932749e-07	NDUFA10	2.52899154127367e-07	postnatal	All OXPHOS	Forebrain/Cerebrum	prenatal vs postnatal	human
20.6486	2.93523	0.435474	6.7403	1.58062876982265e-11	1.21646948641205e-10	COX4I2	5.45571865712979e-11	postnatal	All OXPHOS	Forebrain/Cerebrum	prenatal vs postnatal	human
13463.6	1.56068	0.198026	7.88122	3.24193392653101e-15	4.03003134194895e-14	COX4I1	1.82572068494115e-14	postnatal	All OXPHOS	Forebrain/Cerebrum	prenatal vs postnatal	human
3943.53	1.54461	0.164453	9.39241	5.86432649287278e-21	1.4435711113098e-19	COX7B	5.70439031579443e-20	postnatal	All OXPHOS	Forebrain/Cerebrum	prenatal vs postnatal	human
1479.78	1.10239	0.185432	5.945	2.76463963991165e-09	1.57248745715873e-08	NDUFA2	7.58503696078324e-09	postnatal	All OXPHOS	Forebrain/Cerebrum	prenatal vs postnatal	human
1415.84	0.0295284	0.141299	0.208978	0.834465	0.874497	SCO1	0.834465	postnatal	All OXPHOS	Forebrain/Cerebrum	prenatal vs postnatal	human
4117.43	1.69164	0.221507	7.63697	2.22389049652433e-14	2.45870305579479e-13	COX5B	9.91484513033765e-14	postnatal	All OXPHOS	Forebrain/Cerebrum	prenatal vs postnatal	human
2883.1	1.29449	0.174031	7.4383	1.01986083235523e-13	1.03524188566928e-12	NDUFB5	4.19711957930807e-13	postnatal	All OXPHOS	Forebrain/Cerebrum	prenatal vs postnatal	human
2103.37	0.263985	0.142034	1.8586	0.0630843	0.101421	UQCC2	0.0725808	postnatal	All OXPHOS	Forebrain/Cerebrum	prenatal vs postnatal	human
789.23	1.1764	0.127038	9.26023	2.03983566459388e-20	4.69995751740351e-19	NDUFAF1	1.73450756418491e-19	postnatal	All OXPHOS	Forebrain/Cerebrum	prenatal vs postnatal	human
723.899	1.48385	0.153822	9.6465	5.08624901422756e-22	1.42053706113249e-20	COX17	6.80285805652935e-21	postnatal	All OXPHOS	Forebrain/Cerebrum	prenatal vs postnatal	human
918.042	1.25451	0.214283	5.85446	4.78569160387433e-09	2.6352608787577e-08	NDUFA9	1.19085814328966e-08	postnatal	All OXPHOS	Forebrain/Cerebrum	prenatal vs postnatal	human
7919.56	0.700818	0.123418	5.67841	1.35951291308797e-08	7.06568415560364e-08	UQCRC2	3.30608822046393e-08	postnatal	All OXPHOS	Forebrain/Cerebrum	prenatal vs postnatal	human
2605.27	1.06546	0.180431	5.90506	3.52514558451023e-09	1.97535065905689e-08	NDUFB10	9.42976443856488e-09	postnatal	All OXPHOS	Forebrain/Cerebrum	prenatal vs postnatal	human
3021.63	0.558405	0.170643	3.27237	0.00106651	0.00257341	SDHC	0.00148204	postnatal	All OXPHOS	Forebrain/Cerebrum	prenatal vs postnatal	human
1537.57	0.715709	0.205566	3.48164	0.000498345	0.00127822	NDUFS6	0.000710972	postnatal	All OXPHOS	Forebrain/Cerebrum	prenatal vs postnatal	human
3352.41	-0.0824299	0.214566	-0.38417	0.700853	0.764195	NDUFB11	0.735208	prenatal	All OXPHOS	Forebrain/Cerebrum	prenatal vs postnatal	human
4187.48	1.81353	0.208272	8.70752	3.10595555957317e-18	5.49871895392681e-17	NDUFB9	2.21558163249553e-17	postnatal	All OXPHOS	Forebrain/Cerebrum	prenatal vs postnatal	human
620.915	0.81159	0.200111	4.05571	4.99831364290855e-05	0.000152387	SURF1	7.75100811291616e-05	postnatal	All OXPHOS	Forebrain/Cerebrum	prenatal vs postnatal	human
1621.23	1.08105	0.183564	5.8892	3.88074158936185e-09	2.16446587638092e-08	NDUFC2	1.01277890258956e-08	postnatal	All OXPHOS	Forebrain/Cerebrum	prenatal vs postnatal	human
587.896	-0.0457577	0.187057	-0.244619	0.806751	0.851903	NUBPL	0.822118	prenatal	All OXPHOS	Forebrain/Cerebrum	prenatal vs postnatal	human
679.496	0.825965	0.16315	5.0626	4.13581209547791e-07	1.7356355660899e-06	SDHAF4	7.90235525385959e-07	postnatal	All OXPHOS	Forebrain/Cerebrum	prenatal vs postnatal	human
842.077	0.102005	0.12003	0.849832	0.395418	0.483616	NDUFAF6	0.431732	postnatal	All OXPHOS	Forebrain/Cerebrum	prenatal vs postnatal	human
7771.56	1.23411	0.138263	8.92582	4.42404182015543e-19	8.65236032418357e-18	UQCRB	3.38123196254736e-18	postnatal	All OXPHOS	Forebrain/Cerebrum	prenatal vs postnatal	human
4.52692	2.70821	0.736627	3.6765	0.000236458	0.000642857	COX6A2	0.000356352	postnatal	All OXPHOS	Forebrain/Cerebrum	prenatal vs postnatal	human
5804.43	0.79314	0.143226	5.53769	3.06494213211631e-08	1.51736333029764e-07	NDUFS2	6.5589761627289e-08	postnatal	All OXPHOS	Forebrain/Cerebrum	prenatal vs postnatal	human
1578.58	0.654419	0.140892	4.64484	3.40337628528943e-06	1.24869855014843e-05	NDUFV3	5.87356875041885e-06	postnatal	All OXPHOS	Forebrain/Cerebrum	prenatal vs postnatal	human
12.3729	-0.322251	0.461135	-0.698822	0.484663	0.56929	COX6B2	0.523828	prenatal	All OXPHOS	Forebrain/Cerebrum	prenatal vs postnatal	human
456.471	4.38288	0.419	10.4603	1.31394807389534e-25	5.69072815076643e-24	COX7A1	4.68641479689338e-24	postnatal	All OXPHOS	Forebrain/Cerebrum	prenatal vs postnatal	human
1603.73	0.0793409	0.215723	0.36779	0.71303	0.774589	COA7	0.74072	postnatal	All OXPHOS	Forebrain/Cerebrum	prenatal vs postnatal	human
808.762	-0.528122	0.0933779	-5.65575	1.5516360155607e-08	7.99329265454508e-08	COX18	3.60924029706511e-08	prenatal	All OXPHOS	Forebrain/Cerebrum	prenatal vs postnatal	human
707.029	0.648282	0.12298	5.27145	1.35350108312577e-07	6.11274389725411e-07	NDUFAF2	2.73253992253693e-07	postnatal	All OXPHOS	Forebrain/Cerebrum	prenatal vs postnatal	human
1924.88	0.546833	0.121263	4.50949	6.4984604355392e-06	2.2822280543717e-05	NDUFS4	1.06974656400415e-05	postnatal	All OXPHOS	Forebrain/Cerebrum	prenatal vs postnatal	human
2923.83	1.18554	0.201672	5.87854	4.1389668427758e-09	2.29776862585012e-08	UQCRQ	1.05445107661193e-08	postnatal	All OXPHOS	Forebrain/Cerebrum	prenatal vs postnatal	human
5560.43	1.80448	0.186868	9.65647	4.61514158352434e-22	1.29744958684893e-20	COX6C	6.80285805652935e-21	postnatal	All OXPHOS	Forebrain/Cerebrum	prenatal vs postnatal	human
1550.41	1.08621	0.146695	7.40451	1.31639759838382e-13	1.31701459089729e-12	NDUFB6	5.21683492692846e-13	postnatal	All OXPHOS	Forebrain/Cerebrum	prenatal vs postnatal	human
951.087	1.18004	0.232897	5.06678	4.04591319870853e-07	1.70005722764631e-06	NDUFB8	7.87114022294205e-07	postnatal	All OXPHOS	Forebrain/Cerebrum	prenatal vs postnatal	human
1934.58	0.140684	0.151904	0.926139	0.354374	0.442139	COX11	0.390907	postnatal	All OXPHOS	Forebrain/Cerebrum	prenatal vs postnatal	human
6998.27	0.854913	0.195738	4.36764	1.25595852371732e-05	4.21293798661672e-05	NDUFV1	2.00578450802617e-05	postnatal	All OXPHOS	Forebrain/Cerebrum	prenatal vs postnatal	human
242.626	0.276369	0.187972	1.47027	0.14149	0.204316	SDHAF2	0.159362	postnatal	All OXPHOS	Forebrain/Cerebrum	prenatal vs postnatal	human
718.656	1.12278	0.202026	5.55763	2.73466161908424e-08	1.36431765984497e-07	COA6	5.97160802534723e-08	postnatal	All OXPHOS	Forebrain/Cerebrum	prenatal vs postnatal	human
5977.09	1.22577	0.160432	7.64045	2.16456393665428e-14	2.39488443846637e-13	NDUFS5	9.91484513033765e-14	postnatal	All OXPHOS	Forebrain/Cerebrum	prenatal vs postnatal	human
2915.93	1.08003	0.155163	6.96057	3.38890673661521e-12	2.83839935305518e-11	UQCRFS1	1.25038972695802e-11	postnatal	All OXPHOS	Forebrain/Cerebrum	prenatal vs postnatal	human
2.1064	4.51524	1.31538	3.43266	0.000597689	0.00150907	COX7B2	0.000841483	postnatal	All OXPHOS	Forebrain/Cerebrum	prenatal vs postnatal	human
1625.32	1.93181	0.193937	9.96098	2.25829830719568e-23	7.43248751236075e-22	NDUFA3	4.83275837739875e-22	postnatal	All OXPHOS	Forebrain/Cerebrum	prenatal vs postnatal	human
1339.62	0.930358	0.202947	4.58425	4.55618624866185e-06	1.63748731034288e-05	TMEM126B	7.61737388448154e-06	postnatal	All OXPHOS	Forebrain/Cerebrum	prenatal vs postnatal	human
532.899	-0.410719	0.0881934	-4.65703	3.20802538786893e-06	1.18152120644658e-05	ATPAF2	5.62719207380288e-06	prenatal	All OXPHOS	Forebrain/Cerebrum	prenatal vs postnatal	human
6459.43	1.21507	0.151922	7.99796	1.26499612624148e-15	1.64935184278361e-14	CYCS	7.51969919487991e-15	postnatal	All OXPHOS	Forebrain/Cerebrum	prenatal vs postnatal	human
6005.56	0.985013	0.144525	6.81551	9.3929870809172e-12	7.44364958700954e-11	UQCRH	3.3501653921938e-11	postnatal	All OXPHOS	Forebrain/Cerebrum	prenatal vs postnatal	human
606.853	0.103147	0.25519	0.404195	0.68607	0.75142	NDUFA11	0.726826	postnatal	All OXPHOS	Forebrain/Cerebrum	prenatal vs postnatal	human
2934.39	1.0983	0.197246	5.56816	2.57436398490052e-08	1.28972830385192e-07	COX8A	5.73868638300742e-08	postnatal	All OXPHOS	Forebrain/Cerebrum	prenatal vs postnatal	human
1759.23	0.22206	0.16252	1.36636	0.171826	0.240892	ACAD9	0.191515	postnatal	All OXPHOS	Forebrain/Cerebrum	prenatal vs postnatal	human
1201.28	1.15155	0.214307	5.37337	7.72784159831391e-08	3.61124031781099e-07	NDUFAF3	1.62133147258743e-07	postnatal	All OXPHOS	Forebrain/Cerebrum	prenatal vs postnatal	human
49.0937	-1.64349	0.389382	-4.22077	2.43472725888266e-05	7.83116880900327e-05	NDUFV2	3.83111495147712e-05	prenatal	All OXPHOS	Forebrain/Cerebrum	prenatal vs postnatal	human
646.822	2.06622	0.219425	9.41649	4.66431121813615e-21	1.1577099372324e-19	COX14	4.99081300340568e-20	postnatal	All OXPHOS	Forebrain/Cerebrum	prenatal vs postnatal	human
3848.37	0.951678	0.150766	6.31228	2.74956532990012e-10	1.79562959612621e-09	COX5A	8.65304383233274e-10	postnatal	All OXPHOS	Forebrain/Cerebrum	prenatal vs postnatal	human
3279.77	0.835402	0.162476	5.14168	2.72289121665696e-07	1.17367490434987e-06	CYC1	5.39535852189435e-07	postnatal	All OXPHOS	Forebrain/Cerebrum	prenatal vs postnatal	human
959.915	-0.322549	0.165812	-1.94527	0.0517421	0.0852168	COA4	0.0601783	prenatal	All OXPHOS	Forebrain/Cerebrum	prenatal vs postnatal	human
1644.49	0.3053	0.120914	2.52493	0.0115722	0.0224328	COA5	0.0149184	postnatal	All OXPHOS	Forebrain/Cerebrum	prenatal vs postnatal	human
1958.08	1.17115	0.183492	6.3826	1.74110050110458e-10	1.17002580110207e-09	NDUFB1	5.82180480056844e-10	postnatal	All OXPHOS	Forebrain/Cerebrum	prenatal vs postnatal	human
2082.87	0.73621	0.153236	4.80441	1.55206622502936e-06	5.98785787100147e-06	COA3	2.86329458755416e-06	postnatal	All OXPHOS	Forebrain/Cerebrum	prenatal vs postnatal	human
3066.59	1.28883	0.124336	10.3657	3.55034837829167e-25	1.44351851614787e-23	UQCR10	9.49718191193021e-24	postnatal	All OXPHOS	Forebrain/Cerebrum	prenatal vs postnatal	human
2139.97	1.19422	0.12584	9.48997	2.31091130360713e-21	5.95338563767203e-20	NDUFA12	2.74741677206626e-20	postnatal	All OXPHOS	Forebrain/Cerebrum	prenatal vs postnatal	human
973.956	0.598261	0.169908	3.52109	0.000429771	0.00111438	NDUFA6	0.000621425	postnatal	All OXPHOS	Forebrain/Cerebrum	prenatal vs postnatal	human
145.857	-0.84949	0.212666	-3.99447	6.48388234133901e-05	0.000194425	NDUFA13	9.91107729318963e-05	prenatal	All OXPHOS	Forebrain/Cerebrum	prenatal vs postnatal	human
11899.3	2.29663	0.201938	11.3729	5.70508371486597e-30	4.08850651642817e-28	NDUFA4	6.10443957490658e-28	postnatal	All OXPHOS	Forebrain/Cerebrum	prenatal vs postnatal	human
375.556	-0.0665352	0.219115	-0.303654	0.761392	0.814309	SDHAF3	0.783355	prenatal	All OXPHOS	Forebrain/Cerebrum	prenatal vs postnatal	human
3027.42	-0.402547	0.218779	-1.83997	0.065773	0.105183	COX20	0.0748692	prenatal	All OXPHOS	Forebrain/Cerebrum	prenatal vs postnatal	human
1071.07	0.596409	0.210003	2.84	0.00451135	0.00958258	SDHD	0.00603394	postnatal	All OXPHOS	Forebrain/Cerebrum	prenatal vs postnatal	human
398.443	0.425015	0.214813	1.97853	0.0478686	0.079592	UQCC3	0.0569105	postnatal	All OXPHOS	Forebrain/Cerebrum	prenatal vs postnatal	human
540.317	1.08831	0.180039	6.04485	1.49546210054751e-09	8.826859453439e-09	SDHAF1	4.44484568773842e-09	postnatal	All OXPHOS	Forebrain/Cerebrum	prenatal vs postnatal	human
3199.27	0.971978	0.15301	6.35239	2.11990823272151e-10	1.40718208855286e-09	NDUFS3	6.87364184549097e-10	postnatal	All OXPHOS	Forebrain/Cerebrum	prenatal vs postnatal	human
623.442	0.255288	0.0908911	2.80872	0.0049739	0.0104647	COX19	0.00657046	postnatal	All OXPHOS	Forebrain/Cerebrum	prenatal vs postnatal	human
17.2942	1.017	0.22727	4.47486	7.646253647703e-06	2.65297392323182e-05	NDUFA7	1.23961990955185e-05	postnatal	All OXPHOS	Forebrain/Cerebrum	prenatal vs postnatal	human
909.576	0.0292882	0.135268	0.21652	0.828583	0.87001	NDUFAF7	0.828583	postnatal	Complex I	Forebrain/Cerebrum	prenatal vs postnatal	human
2291.46	0.805529	0.172515	4.66934	3.02169110607524e-06	1.11730038374106e-05	NDUFAB1	5.5957242705097e-06	postnatal	Complex I	Forebrain/Cerebrum	prenatal vs postnatal	human
1377.75	0.587519	0.234186	2.50877	0.0121153	0.0233855	NDUFS1	0.0151442	postnatal	Complex I	Forebrain/Cerebrum	prenatal vs postnatal	human
2964.64	0.745241	0.161216	4.62263	3.78907580511146e-06	1.37903716185545e-05	NDUFB4	6.53288931915768e-06	postnatal	Complex I	Forebrain/Cerebrum	prenatal vs postnatal	human
2803.64	1.35326	0.176832	7.65282	1.96618446531294e-14	2.18510437193796e-13	NDUFB2	1.08228196832714e-13	postnatal	Complex I	Forebrain/Cerebrum	prenatal vs postnatal	human
1963.73	1.07564	0.228911	4.69893	2.61525462624927e-06	9.77172658800117e-06	NDUFB7	5.02933581971014e-06	postnatal	Complex I	Forebrain/Cerebrum	prenatal vs postnatal	human
1221.66	0.384712	0.165581	2.3234	0.0201575	0.0369086	NDUFAF5	0.023997	postnatal	Complex I	Forebrain/Cerebrum	prenatal vs postnatal	human
1506.08	1.115	0.133197	8.37106	5.71041684338596e-17	8.73337241288362e-16	NDUFC1	4.07886917384711e-16	postnatal	Complex I	Forebrain/Cerebrum	prenatal vs postnatal	human
2227.75	0.328515	0.149353	2.19959	0.027836	0.0493446	FOXRED1	0.0323674	postnatal	Complex I	Forebrain/Cerebrum	prenatal vs postnatal	human
2025.74	0.585722	0.201728	2.90352	0.00368996	0.00798645	NDUFS8	0.00485521	postnatal	Complex I	Forebrain/Cerebrum	prenatal vs postnatal	human
1675.45	0.395008	0.143102	2.76032	0.00577441	0.0119735	TIMMDC1	0.00740309	postnatal	Complex I	Forebrain/Cerebrum	prenatal vs postnatal	human
2227.96	0.641067	0.26971	2.37688	0.01746	0.0324184	NDUFS7	0.0212927	postnatal	Complex I	Forebrain/Cerebrum	prenatal vs postnatal	human
1330.36	1.30717	0.173782	7.52187	5.39988838269055e-14	5.65616068798894e-13	NDUFB3	2.4544947194048e-13	postnatal	Complex I	Forebrain/Cerebrum	prenatal vs postnatal	human
2440.92	1.54546	0.184204	8.38994	4.86372175749764e-17	7.49600108308713e-16	NDUFA8	4.05310146458136e-16	postnatal	Complex I	Forebrain/Cerebrum	prenatal vs postnatal	human
1614.57	1.20476	0.200134	6.01977	1.74668669396348e-09	1.02068801647252e-08	NDUFAF4	5.45839591863586e-09	postnatal	Complex I	Forebrain/Cerebrum	prenatal vs postnatal	human
3172.58	1.99811	0.181422	11.0136	3.28461597940363e-28	1.93604465342206e-26	NDUFA1	1.64230798970182e-26	postnatal	Complex I	Forebrain/Cerebrum	prenatal vs postnatal	human
6132.46	1.20896	0.154988	7.80037	6.17249721293372e-15	7.35482084175883e-14	NDUFA5	3.85781075808358e-14	postnatal	Complex I	Forebrain/Cerebrum	prenatal vs postnatal	human
1826.06	0.398777	0.204141	1.95344	0.0507673	0.0838332	ECSIT	0.0576901	postnatal	Complex I	Forebrain/Cerebrum	prenatal vs postnatal	human
5743.07	0.747868	0.141397	5.28912	1.22904261818907e-07	5.5835678932749e-07	NDUFA10	2.6718317786719e-07	postnatal	Complex I	Forebrain/Cerebrum	prenatal vs postnatal	human
1479.78	1.10239	0.185432	5.945	2.76463963991165e-09	1.57248745715873e-08	NDUFA2	8.13129305856367e-09	postnatal	Complex I	Forebrain/Cerebrum	prenatal vs postnatal	human
2883.1	1.29449	0.174031	7.4383	1.01986083235523e-13	1.03524188566928e-12	NDUFB5	4.24942013481347e-13	postnatal	Complex I	Forebrain/Cerebrum	prenatal vs postnatal	human
789.23	1.1764	0.127038	9.26023	2.03983566459388e-20	4.69995751740351e-19	NDUFAF1	2.54979458074235e-19	postnatal	Complex I	Forebrain/Cerebrum	prenatal vs postnatal	human
918.042	1.25451	0.214283	5.85446	4.78569160387433e-09	2.6352608787577e-08	NDUFA9	1.19642290096858e-08	postnatal	Complex I	Forebrain/Cerebrum	prenatal vs postnatal	human
2605.27	1.06546	0.180431	5.90506	3.52514558451023e-09	1.97535065905689e-08	NDUFB10	9.79207106808398e-09	postnatal	Complex I	Forebrain/Cerebrum	prenatal vs postnatal	human
1537.57	0.715709	0.205566	3.48164	0.000498345	0.00127822	NDUFS6	0.000673439	postnatal	Complex I	Forebrain/Cerebrum	prenatal vs postnatal	human
3352.41	-0.0824299	0.214566	-0.38417	0.700853	0.764195	NDUFB11	0.730055	prenatal	Complex I	Forebrain/Cerebrum	prenatal vs postnatal	human
4187.48	1.81353	0.208272	8.70752	3.10595555957317e-18	5.49871895392681e-17	NDUFB9	3.10595555957317e-17	postnatal	Complex I	Forebrain/Cerebrum	prenatal vs postnatal	human
1621.23	1.08105	0.183564	5.8892	3.88074158936185e-09	2.16446587638092e-08	NDUFC2	1.02124778667417e-08	postnatal	Complex I	Forebrain/Cerebrum	prenatal vs postnatal	human
587.896	-0.0457577	0.187057	-0.244619	0.806751	0.851903	NUBPL	0.823216	prenatal	Complex I	Forebrain/Cerebrum	prenatal vs postnatal	human
842.077	0.102005	0.12003	0.849832	0.395418	0.483616	NDUFAF6	0.429803	postnatal	Complex I	Forebrain/Cerebrum	prenatal vs postnatal	human
5804.43	0.79314	0.143226	5.53769	3.06494213211631e-08	1.51736333029764e-07	NDUFS2	7.29748126694359e-08	postnatal	Complex I	Forebrain/Cerebrum	prenatal vs postnatal	human
1578.58	0.654419	0.140892	4.64484	3.40337628528943e-06	1.24869855014843e-05	NDUFV3	6.07745765230255e-06	postnatal	Complex I	Forebrain/Cerebrum	prenatal vs postnatal	human
707.029	0.648282	0.12298	5.27145	1.35350108312577e-07	6.11274389725411e-07	NDUFAF2	2.81979392317868e-07	postnatal	Complex I	Forebrain/Cerebrum	prenatal vs postnatal	human
1924.88	0.546833	0.121263	4.50949	6.4984604355392e-06	2.2822280543717e-05	NDUFS4	1.04813877992568e-05	postnatal	Complex I	Forebrain/Cerebrum	prenatal vs postnatal	human
1550.41	1.08621	0.146695	7.40451	1.31639759838382e-13	1.31701459089729e-12	NDUFB6	5.06306768609161e-13	postnatal	Complex I	Forebrain/Cerebrum	prenatal vs postnatal	human
951.087	1.18004	0.232897	5.06678	4.04591319870853e-07	1.70005722764631e-06	NDUFB8	8.09182639741706e-07	postnatal	Complex I	Forebrain/Cerebrum	prenatal vs postnatal	human
6998.27	0.854913	0.195738	4.36764	1.25595852371732e-05	4.21293798661672e-05	NDUFV1	1.90296746017776e-05	postnatal	Complex I	Forebrain/Cerebrum	prenatal vs postnatal	human
5977.09	1.22577	0.160432	7.64045	2.16456393665428e-14	2.39488443846637e-13	NDUFS5	1.08228196832714e-13	postnatal	Complex I	Forebrain/Cerebrum	prenatal vs postnatal	human
1625.32	1.93181	0.193937	9.96098	2.25829830719568e-23	7.43248751236075e-22	NDUFA3	5.64574576798919e-22	postnatal	Complex I	Forebrain/Cerebrum	prenatal vs postnatal	human
1339.62	0.930358	0.202947	4.58425	4.55618624866185e-06	1.63748731034288e-05	TMEM126B	7.59364374776976e-06	postnatal	Complex I	Forebrain/Cerebrum	prenatal vs postnatal	human
606.853	0.103147	0.25519	0.404195	0.68607	0.75142	NDUFA11	0.729861	postnatal	Complex I	Forebrain/Cerebrum	prenatal vs postnatal	human
1759.23	0.22206	0.16252	1.36636	0.171826	0.240892	ACAD9	0.190918	postnatal	Complex I	Forebrain/Cerebrum	prenatal vs postnatal	human
1201.28	1.15155	0.214307	5.37337	7.72784159831391e-08	3.61124031781099e-07	NDUFAF3	1.75632763598043e-07	postnatal	Complex I	Forebrain/Cerebrum	prenatal vs postnatal	human
49.0937	-1.64349	0.389382	-4.22077	2.43472725888266e-05	7.83116880900327e-05	NDUFV2	3.58048126306273e-05	prenatal	Complex I	Forebrain/Cerebrum	prenatal vs postnatal	human
1958.08	1.17115	0.183492	6.3826	1.74110050110458e-10	1.17002580110207e-09	NDUFB1	6.2182160753735e-10	postnatal	Complex I	Forebrain/Cerebrum	prenatal vs postnatal	human
2139.97	1.19422	0.12584	9.48997	2.31091130360713e-21	5.95338563767203e-20	NDUFA12	3.85151883934522e-20	postnatal	Complex I	Forebrain/Cerebrum	prenatal vs postnatal	human
973.956	0.598261	0.169908	3.52109	0.000429771	0.00111438	NDUFA6	0.000596904	postnatal	Complex I	Forebrain/Cerebrum	prenatal vs postnatal	human
145.857	-0.84949	0.212666	-3.99447	6.48388234133901e-05	0.000194425	NDUFA13	9.26268905905573e-05	prenatal	Complex I	Forebrain/Cerebrum	prenatal vs postnatal	human
3199.27	0.971978	0.15301	6.35239	2.11990823272151e-10	1.40718208855286e-09	NDUFS3	7.06636077573838e-10	postnatal	Complex I	Forebrain/Cerebrum	prenatal vs postnatal	human
17.2942	1.017	0.22727	4.47486	7.646253647703e-06	2.65297392323182e-05	NDUFA7	1.19472713245359e-05	postnatal	Complex I	Forebrain/Cerebrum	prenatal vs postnatal	human
6243.76	0.560473	0.185792	3.01667	0.0025557	0.00571323	UQCRC1	0.00325271	postnatal	Complex III	Forebrain/Cerebrum	prenatal vs postnatal	human
1175.76	-0.263694	0.123005	-2.14376	0.0320518	0.0559092	BCS1L	0.0373938	prenatal	Complex III	Forebrain/Cerebrum	prenatal vs postnatal	human
2408.85	0.900049	0.122304	7.35912	1.8512816305348e-13	1.81508202909783e-12	UQCC1	6.4794857068718e-13	postnatal	Complex III	Forebrain/Cerebrum	prenatal vs postnatal	human
933.8	1.03039	0.166555	6.18648	6.15223489736004e-10	3.82629318777747e-09	UQCR11	1.23044697947201e-09	postnatal	Complex III	Forebrain/Cerebrum	prenatal vs postnatal	human
2103.37	0.263985	0.142034	1.8586	0.0630843	0.101421	UQCC2	0.0630843	postnatal	Complex III	Forebrain/Cerebrum	prenatal vs postnatal	human
7919.56	0.700818	0.123418	5.67841	1.35951291308797e-08	7.06568415560364e-08	UQCRC2	2.11479786480351e-08	postnatal	Complex III	Forebrain/Cerebrum	prenatal vs postnatal	human
7771.56	1.23411	0.138263	8.92582	4.42404182015543e-19	8.65236032418357e-18	UQCRB	3.0968292741088e-18	postnatal	Complex III	Forebrain/Cerebrum	prenatal vs postnatal	human
2923.83	1.18554	0.201672	5.87854	4.1389668427758e-09	2.29776862585012e-08	UQCRQ	7.24319197485765e-09	postnatal	Complex III	Forebrain/Cerebrum	prenatal vs postnatal	human
2915.93	1.08003	0.155163	6.96057	3.38890673661521e-12	2.83839935305518e-11	UQCRFS1	9.48893886252258e-12	postnatal	Complex III	Forebrain/Cerebrum	prenatal vs postnatal	human
6459.43	1.21507	0.151922	7.99796	1.26499612624148e-15	1.64935184278361e-14	CYCS	5.90331525579357e-15	postnatal	Complex III	Forebrain/Cerebrum	prenatal vs postnatal	human
6005.56	0.985013	0.144525	6.81551	9.3929870809172e-12	7.44364958700954e-11	UQCRH	2.19169698554735e-11	postnatal	Complex III	Forebrain/Cerebrum	prenatal vs postnatal	human
3279.77	0.835402	0.162476	5.14168	2.72289121665696e-07	1.17367490434987e-06	CYC1	3.81204770331974e-07	postnatal	Complex III	Forebrain/Cerebrum	prenatal vs postnatal	human
3066.59	1.28883	0.124336	10.3657	3.55034837829167e-25	1.44351851614787e-23	UQCR10	4.97048772960833e-24	postnatal	Complex III	Forebrain/Cerebrum	prenatal vs postnatal	human
398.443	0.425015	0.214813	1.97853	0.0478686	0.079592	UQCC3	0.0515508	postnatal	Complex III	Forebrain/Cerebrum	prenatal vs postnatal	human
549.262	-0.320177	0.153354	-2.08783	0.0368132	0.063193	COX10	0.0463574	prenatal	Complex IV	Forebrain/Cerebrum	prenatal vs postnatal	human
1686.64	-0.522384	0.145738	-3.58439	0.000337865	0.000892886	COX15	0.000522155	prenatal	Complex IV	Forebrain/Cerebrum	prenatal vs postnatal	human
2048.74	-0.0916566	0.186423	-0.49166	0.622959	0.696961	COA1	0.661894	prenatal	Complex IV	Forebrain/Cerebrum	prenatal vs postnatal	human
3449.03	1.83618	0.189716	9.67855	3.71955766046334e-22	1.06368670933289e-20	COX6A1	3.45864932967474e-21	postnatal	Complex IV	Forebrain/Cerebrum	prenatal vs postnatal	human
4963.76	1.00787	0.178539	5.64513	1.65054645513023e-08	8.4663457372317e-08	COX7A2	3.50741121715174e-08	postnatal	Complex IV	Forebrain/Cerebrum	prenatal vs postnatal	human
4313.96	0.472153	0.133225	3.54402	0.000394074	0.0010296	COX7A2L	0.000582545	postnatal	Complex IV	Forebrain/Cerebrum	prenatal vs postnatal	human
5445.85	1.38018	0.177394	7.78033	7.23384574715054e-15	8.53102787323783e-14	COX6B1	2.45950755403118e-14	postnatal	Complex IV	Forebrain/Cerebrum	prenatal vs postnatal	human
7821.58	0.752863	0.132945	5.66298	1.48766302558283e-08	7.68625896551129e-08	COX7C	3.50741121715174e-08	postnatal	Complex IV	Forebrain/Cerebrum	prenatal vs postnatal	human
20.6486	2.93523	0.435474	6.7403	1.58062876982265e-11	1.21646948641205e-10	COX4I2	4.47844818116418e-11	postnatal	Complex IV	Forebrain/Cerebrum	prenatal vs postnatal	human
13463.6	1.56068	0.198026	7.88122	3.24193392653101e-15	4.03003134194895e-14	COX4I1	1.22473059446727e-14	postnatal	Complex IV	Forebrain/Cerebrum	prenatal vs postnatal	human
3943.53	1.54461	0.164453	9.39241	5.86432649287278e-21	1.4435711113098e-19	COX7B	2.84838715368106e-20	postnatal	Complex IV	Forebrain/Cerebrum	prenatal vs postnatal	human
1415.84	0.0295284	0.141299	0.208978	0.834465	0.874497	SCO1	0.834465	postnatal	Complex IV	Forebrain/Cerebrum	prenatal vs postnatal	human
4117.43	1.69164	0.221507	7.63697	2.22389049652433e-14	2.45870305579479e-13	COX5B	6.87384335289339e-14	postnatal	Complex IV	Forebrain/Cerebrum	prenatal vs postnatal	human
723.899	1.48385	0.153822	9.6465	5.08624901422756e-22	1.42053706113249e-20	COX17	3.45864932967474e-21	postnatal	Complex IV	Forebrain/Cerebrum	prenatal vs postnatal	human
620.915	0.81159	0.200111	4.05571	4.99831364290855e-05	0.000152387	SURF1	8.49713319294454e-05	postnatal	Complex IV	Forebrain/Cerebrum	prenatal vs postnatal	human
4.52692	2.70821	0.736627	3.6765	0.000236458	0.000642857	COX6A2	0.000382837	postnatal	Complex IV	Forebrain/Cerebrum	prenatal vs postnatal	human
12.3729	-0.322251	0.461135	-0.698822	0.484663	0.56929	COX6B2	0.531566	prenatal	Complex IV	Forebrain/Cerebrum	prenatal vs postnatal	human
456.471	4.38288	0.419	10.4603	1.31394807389534e-25	5.69072815076643e-24	COX7A1	2.23371172562208e-24	postnatal	Complex IV	Forebrain/Cerebrum	prenatal vs postnatal	human
1603.73	0.0793409	0.215723	0.36779	0.71303	0.774589	COA7	0.734637	postnatal	Complex IV	Forebrain/Cerebrum	prenatal vs postnatal	human
808.762	-0.528122	0.0933779	-5.65575	1.5516360155607e-08	7.99329265454508e-08	COX18	3.50741121715174e-08	prenatal	Complex IV	Forebrain/Cerebrum	prenatal vs postnatal	human
5560.43	1.80448	0.186868	9.65647	4.61514158352434e-22	1.29744958684893e-20	COX6C	3.45864932967474e-21	postnatal	Complex IV	Forebrain/Cerebrum	prenatal vs postnatal	human
1934.58	0.140684	0.151904	0.926139	0.354374	0.442139	COX11	0.401624	postnatal	Complex IV	Forebrain/Cerebrum	prenatal vs postnatal	human
718.656	1.12278	0.202026	5.55763	2.73466161908424e-08	1.36431765984497e-07	COA6	5.16547194715913e-08	postnatal	Complex IV	Forebrain/Cerebrum	prenatal vs postnatal	human
2.1064	4.51524	1.31538	3.43266	0.000597689	0.00150907	COX7B2	0.000846726	postnatal	Complex IV	Forebrain/Cerebrum	prenatal vs postnatal	human
6459.43	1.21507	0.151922	7.99796	1.26499612624148e-15	1.64935184278361e-14	CYCS	5.37623353652629e-15	postnatal	Complex IV	Forebrain/Cerebrum	prenatal vs postnatal	human
2934.39	1.0983	0.197246	5.56816	2.57436398490052e-08	1.28972830385192e-07	COX8A	5.14872796980105e-08	postnatal	Complex IV	Forebrain/Cerebrum	prenatal vs postnatal	human
646.822	2.06622	0.219425	9.41649	4.66431121813615e-21	1.1577099372324e-19	COX14	2.64310969027715e-20	postnatal	Complex IV	Forebrain/Cerebrum	prenatal vs postnatal	human
3848.37	0.951678	0.150766	6.31228	2.74956532990012e-10	1.79562959612621e-09	COX5A	7.19117086281571e-10	postnatal	Complex IV	Forebrain/Cerebrum	prenatal vs postnatal	human
959.915	-0.322549	0.165812	-1.94527	0.0517421	0.0852168	COA4	0.0628296	prenatal	Complex IV	Forebrain/Cerebrum	prenatal vs postnatal	human
1644.49	0.3053	0.120914	2.52493	0.0115722	0.0224328	COA5	0.0151329	postnatal	Complex IV	Forebrain/Cerebrum	prenatal vs postnatal	human
2082.87	0.73621	0.153236	4.80441	1.55206622502936e-06	5.98785787100147e-06	COA3	2.77738166584201e-06	postnatal	Complex IV	Forebrain/Cerebrum	prenatal vs postnatal	human
11899.3	2.29663	0.201938	11.3729	5.70508371486597e-30	4.08850651642817e-28	NDUFA4	1.93972846305443e-28	postnatal	Complex IV	Forebrain/Cerebrum	prenatal vs postnatal	human
3027.42	-0.402547	0.218779	-1.83997	0.065773	0.105183	COX20	0.0771131	prenatal	Complex IV	Forebrain/Cerebrum	prenatal vs postnatal	human
623.442	0.255288	0.0908911	2.80872	0.0049739	0.0104647	COX19	0.00676451	postnatal	Complex IV	Forebrain/Cerebrum	prenatal vs postnatal	human
4005.77	1.01197	0.205727	4.91896	8.70030823093275e-07	3.48338707359585e-06	ATPAF1	1.74006164618655e-06	postnatal	Complex V	Forebrain/Cerebrum	prenatal vs postnatal	human
532.899	-0.410719	0.0881934	-4.65703	3.20802538786893e-06	1.18152120644658e-05	ATPAF2	3.20802538786893e-06	prenatal	Complex V	Forebrain/Cerebrum	prenatal vs postnatal	human
18343.8	0.91209	0.223167	4.08703	4.36930581410209e-05	0.000401114	ACO2	0.000218465	postnatal	MT_replication	Forebrain/Cerebrum	prenatal vs postnatal	rhesus
2301.95	0.942104	0.234899	4.01069	6.05423615190455e-05	0.00041293	POLG	0.000302712	postnatal	MT_replication	HindForebrain/Cerebrum/Cerebellum	prenatal vs postnatal	chicken
1941.06	0.674327	0.176113	3.82895	0.000128691	0.000424271	SSBP1	0.000214486	postnatal	MT_replication	Heart	prenatal vs postnatal	human
747.342	-0.94057	0.239091	-3.93395	8.35625549233815e-05	0.00044564	POLG2	0.000208906	prenatal	MT_replication	Liver	prenatal vs postnatal	chicken
34.9151	-7.79148	0.921215	-8.45782	2.72411856982451e-17	4.36034061813795e-16	E2F2	1.67338712146363e-16	prenatal	Positive Response to Hypoxia	Forebrain/Cerebrum	prenatal vs postnatal	human
582.268	0.432384	0.141882	3.04749	0.00230759	0.00520884	NOP16	0.00381639	postnatal	Positive Response to Hypoxia	Forebrain/Cerebrum	prenatal vs postnatal	human
1940.66	0.431253	0.144848	2.97728	0.00290821	0.00643009	MRTO4	0.00471899	postnatal	Positive Response to Hypoxia	Forebrain/Cerebrum	prenatal vs postnatal	human
798.62	-6.43846	0.701296	-9.18081	4.27880584453573e-20	9.47871266553786e-19	MCM10	4.59971628287591e-19	prenatal	Positive Response to Hypoxia	Forebrain/Cerebrum	prenatal vs postnatal	human
2828.93	-0.968014	0.182852	-5.29396	1.1969243919479e-07	5.44510405373282e-07	POLR1A	3.21673430335997e-07	prenatal	Positive Response to Hypoxia	Forebrain/Cerebrum	prenatal vs postnatal	human
3879.27	-4.81558	0.432369	-11.1377	8.22492626802513e-29	5.16373312171561e-27	MCM2	3.53671829525081e-27	prenatal	Positive Response to Hypoxia	Forebrain/Cerebrum	prenatal vs postnatal	human
316.108	-1.53425	0.227585	-6.74143	1.56836228590829e-11	1.20765108353732e-10	TIPIN	5.3951662635245e-11	prenatal	Positive Response to Hypoxia	Forebrain/Cerebrum	prenatal vs postnatal	human
3057	-2.24385	0.301807	-7.43472	1.04792320232924e-13	1.06228415801923e-12	MCM6	4.50606977001573e-13	prenatal	Positive Response to Hypoxia	Forebrain/Cerebrum	prenatal vs postnatal	human
654.215	-3.45947	0.539864	-6.40804	1.47401526199521e-10	9.98175211635281e-10	CLSPN	4.65402573621561e-10	prenatal	Positive Response to Hypoxia	Forebrain/Cerebrum	prenatal vs postnatal	human
521.411	-6.07828	0.491531	-12.366	3.99213961255731e-35	4.84963821876678e-33	CDC45	3.43324006679929e-33	prenatal	Positive Response to Hypoxia	Forebrain/Cerebrum	prenatal vs postnatal	human
757.768	-2.15955	0.474466	-4.55153	5.32573541669022e-06	1.89491936173795e-05	CDC6	1.1450331145884e-05	prenatal	Positive Response to Hypoxia	Forebrain/Cerebrum	prenatal vs postnatal	human
1723.74	-1.52741	0.17305	-8.82638	1.08121353100002e-18	2.02703796489365e-17	CDC7	9.29843636660021e-18	prenatal	Positive Response to Hypoxia	Forebrain/Cerebrum	prenatal vs postnatal	human
262.805	-4.41233	0.409007	-10.7879	3.92636928312533e-27	2.04417455848288e-25	CENPM	1.12555919449593e-25	prenatal	Positive Response to Hypoxia	Forebrain/Cerebrum	prenatal vs postnatal	human
2570.63	0.741692	0.152518	4.86299	1.15623406403393e-06	4.54822940234172e-06	POLR3H	2.68746295964644e-06	postnatal	Positive Response to Hypoxia	Forebrain/Cerebrum	prenatal vs postnatal	human
275.109	-3.92536	0.428193	-9.16729	4.85081255224404e-20	1.07140932972107e-18	POLE2	4.63522088325542e-19	prenatal	Positive Response to Hypoxia	Forebrain/Cerebrum	prenatal vs postnatal	human
5820.39	-0.235757	0.144922	-1.62679	0.103781	0.156502	NOP56	0.127503	prenatal	Positive Response to Hypoxia	Forebrain/Cerebrum	prenatal vs postnatal	human
421.25	-1.02264	0.134752	-7.58904	3.22281105799937e-14	3.48654383246704e-13	POP1	1.53978750548859e-13	prenatal	Positive Response to Hypoxia	Forebrain/Cerebrum	prenatal vs postnatal	human
57.5262	0.922258	0.272028	3.39031	0.000698142	0.00174035	PYCR3	0.00133423	postnatal	Positive Response to Hypoxia	Forebrain/Cerebrum	prenatal vs postnatal	human
4895.95	-2.29153	0.312704	-7.32811	2.33418953474323e-13	2.25744077851996e-12	MCM4	9.12455909035991e-13	prenatal	Positive Response to Hypoxia	Forebrain/Cerebrum	prenatal vs postnatal	human
419.559	-4.86871	0.566647	-8.59213	8.53684803157041e-18	1.44295908696522e-16	ASF1B	5.64745331319274e-17	prenatal	Positive Response to Hypoxia	Forebrain/Cerebrum	prenatal vs postnatal	human
931.62	-0.592401	0.189507	-3.12601	0.00177197	0.00409035	GRWD1	0.00298803	prenatal	Positive Response to Hypoxia	Forebrain/Cerebrum	prenatal vs postnatal	human
1638.28	-0.650191	0.159379	-4.07954	4.5124773671324e-05	0.000138621	ARMC6	9.23983460889015e-05	prenatal	Positive Response to Hypoxia	Forebrain/Cerebrum	prenatal vs postnatal	human
655.475	-0.120414	0.133903	-0.899267	0.36851	0.456555	AIMP2	0.411583	prenatal	Positive Response to Hypoxia	Forebrain/Cerebrum	prenatal vs postnatal	human
1585.91	-0.221098	0.267261	-0.827275	0.408081	0.49583	NOP2	0.449936	prenatal	Positive Response to Hypoxia	Forebrain/Cerebrum	prenatal vs postnatal	human
139.698	0.317074	0.307638	1.03067	0.302695	0.388063	SPSB2	0.342857	postnatal	Positive Response to Hypoxia	Forebrain/Cerebrum	prenatal vs postnatal	human
990.921	-1.44849	0.187083	-7.74248	9.74987523166656e-15	1.12757457981085e-13	UMPS	4.93228982307838e-14	prenatal	Positive Response to Hypoxia	Forebrain/Cerebrum	prenatal vs postnatal	human
673.818	-0.309314	0.159072	-1.94449	0.051836	0.0853293	RRP9	0.0675439	prenatal	Positive Response to Hypoxia	Forebrain/Cerebrum	prenatal vs postnatal	human
9368.53	-2.7268	0.273428	-9.97263	2.00840193510255e-23	6.68363958002279e-22	ODC1	3.45445132837639e-22	prenatal	Positive Response to Hypoxia	Forebrain/Cerebrum	prenatal vs postnatal	human
591.807	-0.0291137	0.182076	-0.159899	0.872961	0.904938	PNO1	0.883231	prenatal	Positive Response to Hypoxia	Forebrain/Cerebrum	prenatal vs postnatal	human
3302.75	0.327995	0.103713	3.16253	0.00156403	0.00364412	FARSB	0.00274503	postnatal	Positive Response to Hypoxia	Forebrain/Cerebrum	prenatal vs postnatal	human
865.292	-0.989304	0.122774	-8.0579	7.76173852803685e-16	1.04247997380608e-14	WDR77	4.45006342274113e-15	prenatal	Positive Response to Hypoxia	Forebrain/Cerebrum	prenatal vs postnatal	human
783.982	-1.95392	0.404682	-4.82829	1.37707773859115e-06	5.35353078444878e-06	TTF2	3.11654435575891e-06	prenatal	Positive Response to Hypoxia	Forebrain/Cerebrum	prenatal vs postnatal	human
2772.72	-1.48499	0.187929	-7.90185	2.74793114225282e-15	3.45617393777967e-14	PIK3R3	1.47701298896089e-14	prenatal	Positive Response to Hypoxia	Forebrain/Cerebrum	prenatal vs postnatal	human
286.308	-0.493342	0.186136	-2.65044	0.00803872	0.0161553	EEF2KMT	0.0123452	prenatal	Positive Response to Hypoxia	Forebrain/Cerebrum	prenatal vs postnatal	human
255.888	0.325325	0.120262	2.70513	0.00682775	0.0139239	RPP40	0.0106761	postnatal	Positive Response to Hypoxia	Forebrain/Cerebrum	prenatal vs postnatal	human
136.861	-0.339263	0.454139	-0.747046	0.455036	0.540899	AUNIP	0.495356	prenatal	Positive Response to Hypoxia	Forebrain/Cerebrum	prenatal vs postnatal	human
332.952	0.512331	0.203525	2.51729	0.0118261	0.0228746	RTN4IP1	0.0175353	postnatal	Positive Response to Hypoxia	Forebrain/Cerebrum	prenatal vs postnatal	human
3842.71	-0.0256793	0.13853	-0.185371	0.852938	0.889119	PSME3	0.873246	prenatal	Positive Response to Hypoxia	Forebrain/Cerebrum	prenatal vs postnatal	human
166.774	-0.889917	0.178866	-4.97533	6.51353596137383e-07	2.6598866995039e-06	SCLY	1.55601136855042e-06	prenatal	Positive Response to Hypoxia	Forebrain/Cerebrum	prenatal vs postnatal	human
3670.72	-2.45536	0.330549	-7.42812	1.10148304606033e-13	1.11280322340997e-12	PCNA	4.51083533148515e-13	prenatal	Positive Response to Hypoxia	Forebrain/Cerebrum	prenatal vs postnatal	human
586.841	-1.83051	0.281776	-6.49635	8.22909660245971e-11	5.75921130838187e-10	URB2	2.72193195312129e-10	prenatal	Positive Response to Hypoxia	Forebrain/Cerebrum	prenatal vs postnatal	human
1991.56	-0.451886	0.208862	-2.16356	0.0304981	0.0535492	SLC5A6	0.0403514	prenatal	Positive Response to Hypoxia	Forebrain/Cerebrum	prenatal vs postnatal	human
201.889	-0.566078	0.147747	-3.8314	0.000127414	0.00036409	ELAC1	0.000254829	prenatal	Positive Response to Hypoxia	Forebrain/Cerebrum	prenatal vs postnatal	human
721.016	1.34164	0.248139	5.40683	6.4150117889171e-08	3.02901267656816e-07	PSEN2	1.83897004615624e-07	postnatal	Positive Response to Hypoxia	Forebrain/Cerebrum	prenatal vs postnatal	human
108.916	-0.79142	0.240042	-3.297	0.000977232	0.00237524	CHAC2	0.00178813	prenatal	Positive Response to Hypoxia	Forebrain/Cerebrum	prenatal vs postnatal	human
530.026	-0.131876	0.179111	-0.73628	0.46156	0.547374	TMEM177	0.496177	prenatal	Positive Response to Hypoxia	Forebrain/Cerebrum	prenatal vs postnatal	human
1825.7	-4.53791	0.481001	-9.43432	3.93543656999626e-21	9.82511165060721e-20	CDCA7	4.83496492885255e-20	prenatal	Positive Response to Hypoxia	Forebrain/Cerebrum	prenatal vs postnatal	human
737.114	-0.78638	0.15052	-5.22441	1.74706667729857e-07	7.7623164710661e-07	TMEM138	4.55296164386901e-07	prenatal	Positive Response to Hypoxia	Forebrain/Cerebrum	prenatal vs postnatal	human
538.902	-2.12083	0.244285	-8.68179	3.8960489943232e-18	6.8367309539844e-17	SFXN2	2.79216844593162e-17	prenatal	Positive Response to Hypoxia	Forebrain/Cerebrum	prenatal vs postnatal	human
106.645	-0.475064	0.326301	-1.45591	0.145419	0.209139	FAM86C2P	0.173695	prenatal	Positive Response to Hypoxia	Forebrain/Cerebrum	prenatal vs postnatal	human
400.956	-0.808233	0.239986	-3.36783	0.000757632	0.00187612	WDR4	0.00141644	prenatal	Positive Response to Hypoxia	Forebrain/Cerebrum	prenatal vs postnatal	human
1242.41	0.79096	0.246722	3.20588	0.0013465	0.00318194	GPATCH4	0.00241248	postnatal	Positive Response to Hypoxia	Forebrain/Cerebrum	prenatal vs postnatal	human
429.707	-1.85805	0.290147	-6.40383	1.51526419318648e-10	1.02425141708176e-09	TEDC2	4.65402573621561e-10	prenatal	Positive Response to Hypoxia	Forebrain/Cerebrum	prenatal vs postnatal	human
1603.73	0.0793409	0.215723	0.36779	0.71303	0.774589	COA7	0.738802	postnatal	Positive Response to Hypoxia	Forebrain/Cerebrum	prenatal vs postnatal	human
947.326	-4.35177	0.459675	-9.46706	2.87837934269341e-21	7.32687293671633e-20	CDC25A	4.12567705786055e-20	prenatal	Positive Response to Hypoxia	Forebrain/Cerebrum	prenatal vs postnatal	human
939.46	0.598717	0.241845	2.47562	0.0133004	0.0254302	MON1A	0.0191805	postnatal	Positive Response to Hypoxia	Forebrain/Cerebrum	prenatal vs postnatal	human
1867.26	1.30029	0.242096	5.37096	7.83192627519824e-08	3.65416525851716e-07	SLC27A4	2.17272793440983e-07	postnatal	Positive Response to Hypoxia	Forebrain/Cerebrum	prenatal vs postnatal	human
782.87	-0.0536387	0.144083	-0.372276	0.709688	0.772025	POP5	0.738802	prenatal	Positive Response to Hypoxia	Forebrain/Cerebrum	prenatal vs postnatal	human
1718.33	-2.32853	0.318223	-7.31728	2.53055217807343e-13	2.43709382177075e-12	CHAF1A	9.46206466583978e-13	prenatal	Positive Response to Hypoxia	Forebrain/Cerebrum	prenatal vs postnatal	human
545.726	0.754593	0.164378	4.5906	4.41972633862584e-06	1.59227368177811e-05	SLC43A2	9.74606320825184e-06	postnatal	Positive Response to Hypoxia	Forebrain/Cerebrum	prenatal vs postnatal	human
1446.4	-0.711124	0.287503	-2.47345	0.0133817	0.0255625	FEN1	0.0191805	prenatal	Positive Response to Hypoxia	Forebrain/Cerebrum	prenatal vs postnatal	human
276.053	-2.71459	0.383201	-7.084	1.40054173877813e-12	1.22486945629633e-11	CHRNA5	5.01860789728831e-12	prenatal	Positive Response to Hypoxia	Forebrain/Cerebrum	prenatal vs postnatal	human
599.402	-0.812927	0.162011	-5.01773	5.22861233172474e-07	2.16505266622228e-06	RIOX1	1.32253135449508e-06	prenatal	Positive Response to Hypoxia	Forebrain/Cerebrum	prenatal vs postnatal	human
56.2538	0.959561	0.442448	2.16876	0.0301012	0.0529549	FAM86JP	0.0403514	postnatal	Positive Response to Hypoxia	Forebrain/Cerebrum	prenatal vs postnatal	human
396.582	-5.65959	0.530919	-10.66	1.56612728634079e-26	7.53657774959872e-25	ESCO2	3.36717366563269e-25	prenatal	Positive Response to Hypoxia	Forebrain/Cerebrum	prenatal vs postnatal	human
2333.39	-1.17679	0.234934	-5.00905	5.47007290481678e-07	2.2572170489857e-06	CTPS1	1.34407505661212e-06	prenatal	Positive Response to Hypoxia	Forebrain/Cerebrum	prenatal vs postnatal	human
20.6046	0.362024	0.223899	1.61691	0.105898	0.159252	UFSP1	0.128271	postnatal	Positive Response to Hypoxia	Forebrain/Cerebrum	prenatal vs postnatal	human
687.403	0.00346031	0.161255	0.0214586	0.98288	0.987467	PUS1	0.98288	postnatal	Positive Response to Hypoxia	Forebrain/Cerebrum	prenatal vs postnatal	human
2192.92	-1.9904	0.267534	-7.43978	1.00852110046048e-13	1.02442707566829e-12	PFAS	4.50606977001573e-13	prenatal	Positive Response to Hypoxia	Forebrain/Cerebrum	prenatal vs postnatal	human
405.527	-0.133799	0.192819	-0.693911	0.487738	0.572219	RRS1	0.517846	prenatal	Positive Response to Hypoxia	Forebrain/Cerebrum	prenatal vs postnatal	human
1382.8	-0.614872	0.195071	-3.15204	0.00162135	0.0037674	DCTPP1	0.00278872	prenatal	Positive Response to Hypoxia	Forebrain/Cerebrum	prenatal vs postnatal	human
763.598	0.342786	0.144094	2.3789	0.0173642	0.0322546	SCFD2	0.0244807	postnatal	Positive Response to Hypoxia	Forebrain/Cerebrum	prenatal vs postnatal	human
676.579	-0.332914	0.181646	-1.83276	0.0668386	0.106688	PRMT3	0.0857929	prenatal	Positive Response to Hypoxia	Forebrain/Cerebrum	prenatal vs postnatal	human
937.949	-0.150726	0.14633	-1.03004	0.30299	0.388357	TOR3A	0.342857	prenatal	Positive Response to Hypoxia	Forebrain/Cerebrum	prenatal vs postnatal	human
71.1299	-1.44049	0.338556	-4.25481	2.09229680264655e-05	6.79042111753796e-05	HPDL	4.38872012262448e-05	prenatal	Positive Response to Hypoxia	Forebrain/Cerebrum	prenatal vs postnatal	human
392.885	-4.88367	0.793596	-6.15385	7.56222947145082e-10	4.6461691102968e-09	FAM111B	2.24259218808542e-09	prenatal	Positive Response to Hypoxia	Forebrain/Cerebrum	prenatal vs postnatal	human
754.022	-0.395195	0.238779	-1.65506	0.0979113	0.148738	PRMT6	0.122034	prenatal	Positive Response to Hypoxia	Forebrain/Cerebrum	prenatal vs postnatal	human
359.018	-0.224698	0.211883	-1.06048	0.288927	0.373359	ATP6V0E2-AS1	0.33578	prenatal	Positive Response to Hypoxia	Forebrain/Cerebrum	prenatal vs postnatal	human
5.27497	-2.17127	0.99168	-2.18949	0.0285616	0.0504751	MCIDAS	0.0389888	prenatal	Positive Response to Hypoxia	Forebrain/Cerebrum	prenatal vs postnatal	human
1548.28	0.16324	0.140485	1.16197	0.245247	0.325756	PGAM5	0.288921	postnatal	Positive Response to Hypoxia	Forebrain/Cerebrum	prenatal vs postnatal	human
245.682	-0.750809	0.202239	-3.71249	0.000205231	0.000564122	MARS2	0.000401134	prenatal	Positive Response to Hypoxia	Forebrain/Cerebrum	prenatal vs postnatal	human
611.59	-0.596215	0.230508	-2.58653	0.00969475	0.0191283	HMBS	0.0146272	prenatal	Positive Response to Hypoxia	Forebrain/Cerebrum	prenatal vs postnatal	human
1891.41	-0.417859	0.182944	-2.28408	0.022367	0.0405322	BOP1	0.0310252	prenatal	Positive Response to Hypoxia	Forebrain/Cerebrum	prenatal vs postnatal	human
1540.16	-5.56893	0.636986	-8.74262	2.27759522213298e-18	4.10269171900072e-17	UHRF1	1.78066535548578e-17	prenatal	Positive Response to Hypoxia	Forebrain/Cerebrum	prenatal vs postnatal	human
2.16287	-1.10181	0.665098	-1.65661	0.097598	0.148335	PIGW	0.122034	prenatal	Positive Response to Hypoxia	Forebrain/Cerebrum	prenatal vs postnatal	human
1.95313	-2.83657	1.00423	-2.82462	0.0047337	0.01001	SNORD30	0.00753886	prenatal	Positive Response to Hypoxia	Forebrain/Cerebrum	prenatal vs postnatal	human
14544.1	2.41553	0.230995	10.4571	1.36012845079074e-25	5.88221108877433e-24	MDH1	1.54147891089618e-24	postnatal	TCA	Forebrain/Cerebrum	prenatal vs postnatal	human
7424.68	-0.0154198	0.0917242	-0.16811	0.866497	0.899767	CS	0.892754	prenatal	TCA	Forebrain/Cerebrum	prenatal vs postnatal	human
2910.07	1.0226	0.202168	5.05819	4.23264738310154e-07	1.77527627223307e-06	IDH3G	9.59400073503016e-07	postnatal	TCA	Forebrain/Cerebrum	prenatal vs postnatal	human
4188.22	0.956243	0.158701	6.02546	1.68634162036181e-09	9.86582478130234e-09	SDHA	5.73356150923015e-09	postnatal	TCA	Forebrain/Cerebrum	prenatal vs postnatal	human
2346.19	-0.378762	0.116044	-3.26396	0.00109866	0.00264393	ME2	0.00169793	prenatal	TCA	Forebrain/Cerebrum	prenatal vs postnatal	human
2928.15	0.458853	0.172478	2.66036	0.00780577	0.0157241	DLD	0.00982949	postnatal	TCA	Forebrain/Cerebrum	prenatal vs postnatal	human
2540.52	0.237462	0.157167	1.51089	0.130816	0.190922	FH	0.158849	postnatal	TCA	Forebrain/Cerebrum	prenatal vs postnatal	human
8488.62	1.63613	0.175647	9.31486	1.22110258000642e-20	2.89384849333163e-19	ACO2	1.03793719300546e-19	postnatal	TCA	Forebrain/Cerebrum	prenatal vs postnatal	human
3541.05	0.682285	0.149036	4.57798	4.69493824707384e-06	1.68370976329719e-05	IDH3B	9.97674377503191e-06	postnatal	TCA	Forebrain/Cerebrum	prenatal vs postnatal	human
4030.53	0.48402	0.169401	2.85725	0.00427331	0.00912756	OGDH	0.00605386	postnatal	TCA	Forebrain/Cerebrum	prenatal vs postnatal	human
4399.34	-0.0177232	0.168873	-0.10495	0.916416	0.938043	NNT	0.916416	prenatal	TCA	Forebrain/Cerebrum	prenatal vs postnatal	human
2119.82	1.2897	0.139326	9.25676	2.10734563872933e-20	4.84803056718918e-19	SDHB	1.43299503433595e-19	postnatal	TCA	Forebrain/Cerebrum	prenatal vs postnatal	human
3550.88	-0.571647	0.0811263	-7.04638	1.83635910135317e-12	1.58606229435948e-11	DLST	1.0406034907668e-11	prenatal	TCA	Forebrain/Cerebrum	prenatal vs postnatal	human
1365.23	-0.353176	0.132705	-2.66136	0.00778267	0.0156797	ACO1	0.00982949	prenatal	TCA	Forebrain/Cerebrum	prenatal vs postnatal	human
4126.7	0.608166	0.111905	5.43465	5.49053071738049e-08	2.62148937463171e-07	PDHA1	1.55565036992447e-07	postnatal	TCA	Forebrain/Cerebrum	prenatal vs postnatal	human
3291	1.27713	0.187227	6.82126	9.02430047816342e-12	7.17049177052474e-11	SUCLA2	4.38323166082223e-11	postnatal	TCA	Forebrain/Cerebrum	prenatal vs postnatal	human
3244.19	-1.06224	0.162033	-6.55571	5.53784825763807e-11	3.96675592836185e-10	IREB2	2.09207600844105e-10	prenatal	TCA	Forebrain/Cerebrum	prenatal vs postnatal	human
189.003	1.30091	0.345305	3.76743	0.000164939	0.00046178	MDH1B	0.000295154	postnatal	TCA	Forebrain/Cerebrum	prenatal vs postnatal	human
4743.98	-1.99238	0.299835	-6.64491	3.03404450961987e-11	2.25209602894884e-10	IDH1	1.28946891658845e-10	prenatal	TCA	Forebrain/Cerebrum	prenatal vs postnatal	human
3021.63	0.558405	0.170643	3.27237	0.00106651	0.00257341	SDHC	0.00169793	postnatal	TCA	Forebrain/Cerebrum	prenatal vs postnatal	human
7051.48	0.709295	0.13421	5.28495	1.2573734025892e-07	5.70533658715088e-07	MDH2	3.2885150529256e-07	postnatal	TCA	Forebrain/Cerebrum	prenatal vs postnatal	human
1810.7	0.161155	0.183167	0.879825	0.378954	0.466919	DLAT	0.415627	postnatal	TCA	Forebrain/Cerebrum	prenatal vs postnatal	human
2071.55	0.694508	0.239332	2.90186	0.00370954	0.00802315	ME3	0.00548367	postnatal	TCA	Forebrain/Cerebrum	prenatal vs postnatal	human
2.02841	4.2124	1.1611	3.62794	0.000285694	0.000764067	PDHA2	0.00048568	postnatal	TCA	Forebrain/Cerebrum	prenatal vs postnatal	human
2827.15	0.661457	0.157967	4.1873	2.82291838082054e-05	8.97447796728096e-05	SUCLG1	5.33217916377213e-05	postnatal	TCA	Forebrain/Cerebrum	prenatal vs postnatal	human
3433.23	2.30522	0.181472	12.7029	5.69983550255556e-37	8.60272142213991e-35	IDH3A	1.93794407086889e-35	postnatal	TCA	Forebrain/Cerebrum	prenatal vs postnatal	human
242.626	0.276369	0.187972	1.47027	0.14149	0.204316	SDHAF2	0.165884	postnatal	TCA	Forebrain/Cerebrum	prenatal vs postnatal	human
2745.84	0.833882	0.164307	5.07515	3.87198832711558e-07	1.63156372204628e-06	PDHB	9.40340022299499e-07	postnatal	TCA	Forebrain/Cerebrum	prenatal vs postnatal	human
597.168	-0.344392	0.409641	-0.840716	0.400507	0.488709	SUCLG2	0.425539	prenatal	TCA	Forebrain/Cerebrum	prenatal vs postnatal	human
1049.34	0.146087	0.133141	1.09724	0.272538	0.355688	FAHD1	0.308877	postnatal	TCA	Forebrain/Cerebrum	prenatal vs postnatal	human
1797.92	-1.35476	0.22749	-5.95523	2.59702949236645e-09	1.48336447534172e-08	DHTKD1	8.02718206731448e-09	prenatal	TCA	Forebrain/Cerebrum	prenatal vs postnatal	human
5137.14	-0.752718	0.169326	-4.44539	8.77335937275042e-06	3.01221359714239e-05	IDH2	1.75467187455008e-05	prenatal	TCA	Forebrain/Cerebrum	prenatal vs postnatal	human
1666.2	3.40948	0.313874	10.8626	1.73775508289584e-27	9.42487711384017e-26	OGDHL	2.95418364092293e-26	postnatal	TCA	Forebrain/Cerebrum	prenatal vs postnatal	human
1071.07	0.596409	0.210003	2.84	0.00451135	0.00958258	SDHD	0.00613544	postnatal	TCA	Forebrain/Cerebrum	prenatal vs postnatal	human
2042.39	-0.0317983	0.177678	-0.178965	0.857965	0.893204	CFLAR	0.883291	prenatal	ROS	Forebrain/Cerebrum	prenatal vs postnatal	human
65.3626	1.51861	0.316282	4.80145	1.57519910353401e-06	6.07083440933845e-06	MPO	4.20053094275736e-06	postnatal	ROS	Forebrain/Cerebrum	prenatal vs postnatal	human
248.982	1.83013	0.36885	4.96172	6.98733223100622e-07	2.84055824229887e-06	NOS2	2.20206833946863e-06	postnatal	ROS	Forebrain/Cerebrum	prenatal vs postnatal	human
7911.73	-0.106125	0.198832	-0.533741	0.593521	0.669995	FYN	0.649749	prenatal	ROS	Forebrain/Cerebrum	prenatal vs postnatal	human
41.8946	3.59247	0.440081	8.1632	3.26266749528335e-16	4.59046871134875e-15	ALOX5	3.7701935501052e-15	postnatal	ROS	Forebrain/Cerebrum	prenatal vs postnatal	human
408.95	-0.268144	0.147598	-1.81672	0.0692596	0.10997	CTNS	0.101451	prenatal	ROS	Forebrain/Cerebrum	prenatal vs postnatal	human
422.547	-0.283182	0.315394	-0.897868	0.369256	0.457194	CYBA	0.422007	prenatal	ROS	Forebrain/Cerebrum	prenatal vs postnatal	human
7027.32	0.98772	0.177641	5.56021	2.69447773881231e-08	1.34557885424215e-07	ATP2B4	9.66295464953381e-08	postnatal	ROS	Forebrain/Cerebrum	prenatal vs postnatal	human
1205.99	0.679146	0.207426	3.27416	0.00105977	0.0025594	SPHK2	0.00204104	postnatal	ROS	Forebrain/Cerebrum	prenatal vs postnatal	human
1801.84	-0.0735216	0.151689	-0.484688	0.627898	0.701469	HDAC4	0.67321	prenatal	ROS	Forebrain/Cerebrum	prenatal vs postnatal	human
1668.52	4.27818	0.253696	16.8634	8.3596219510991e-64	1.13554064721203e-60	MAOB	2.89800227638102e-62	postnatal	ROS	Forebrain/Cerebrum	prenatal vs postnatal	human
794.838	0.954058	0.289897	3.29103	0.000998218	0.0024228	RORA	0.00195877	postnatal	ROS	Forebrain/Cerebrum	prenatal vs postnatal	human
241.691	-0.316205	0.251357	-1.25799	0.208395	0.283574	RAB27A	0.267569	prenatal	ROS	Forebrain/Cerebrum	prenatal vs postnatal	human
265.201	3.60915	0.435587	8.28571	1.17401856659137e-16	1.73427438675316e-15	PTGS2	1.52622413656878e-15	postnatal	ROS	Forebrain/Cerebrum	prenatal vs postnatal	human
329.77	1.30749	0.365005	3.58212	0.000340824	0.000899829	EDN1	0.000708913	postnatal	ROS	Forebrain/Cerebrum	prenatal vs postnatal	human
3402.31	-0.297021	0.135029	-2.19969	0.027829	0.049338	DNM2	0.0438517	prenatal	ROS	Forebrain/Cerebrum	prenatal vs postnatal	human
85123.7	0.884138	0.242945	3.63926	0.000273427	0.00073369	HSP90AA1	0.000580336	postnatal	ROS	Forebrain/Cerebrum	prenatal vs postnatal	human
1687.58	-0.466242	0.260332	-1.79095	0.0733014	0.115565	ARG2	0.10588	prenatal	ROS	Forebrain/Cerebrum	prenatal vs postnatal	human
103.048	-2.72206	0.35786	-7.6065	2.81617868179504e-14	3.07260619666897e-13	NOX4	2.44068819088904e-13	prenatal	ROS	Forebrain/Cerebrum	prenatal vs postnatal	human
7662.84	-1.13026	0.192868	-5.86029	4.62052890664375e-09	2.55089388224906e-08	KHSRP	2.04727496817639e-08	prenatal	ROS	Forebrain/Cerebrum	prenatal vs postnatal	human
14939.3	1.23867	0.158444	7.81776	5.37732813873703e-15	6.47185155449124e-14	DYNLL1	5.59242126428651e-14	postnatal	ROS	Forebrain/Cerebrum	prenatal vs postnatal	human
315.851	1.98384	0.507352	3.91018	9.22289004547996e-05	0.00027016	NOS1	0.000217996	postnatal	ROS	Forebrain/Cerebrum	prenatal vs postnatal	human
124.937	1.55481	0.342167	4.54401	5.51938261063712e-06	1.96078494931383e-05	ICAM1	1.40003851586893e-05	postnatal	ROS	Forebrain/Cerebrum	prenatal vs postnatal	human
63576.6	0.435882	0.143823	3.03069	0.00243994	0.0054778	HSP90AB1	0.00453131	postnatal	ROS	Forebrain/Cerebrum	prenatal vs postnatal	human
661.097	0.0355467	0.211142	0.168354	0.866305	0.89963	JAK2	0.883291	postnatal	ROS	Forebrain/Cerebrum	prenatal vs postnatal	human
4741.28	0.379998	0.156021	2.43556	0.0148689	0.0280607	CYB5R3	0.0241619	postnatal	ROS	Forebrain/Cerebrum	prenatal vs postnatal	human
469.666	-0.861532	0.462484	-1.86284	0.0624851	0.100582	TSPO	0.092835	prenatal	ROS	Forebrain/Cerebrum	prenatal vs postnatal	human
4.32291	0.351358	1.13127	0.310587	0.756114	0.810357	PAGE4	0.794302	postnatal	ROS	Forebrain/Cerebrum	prenatal vs postnatal	human
320.94	-1.07049	0.222235	-4.81691	1.45794770547198e-06	5.64588690298363e-06	ABCD1	4.07342573474057e-06	prenatal	ROS	Forebrain/Cerebrum	prenatal vs postnatal	human
685.183	-0.509967	0.176603	-2.88764	0.00388138	0.0083632	GLA	0.00684175	prenatal	ROS	Forebrain/Cerebrum	prenatal vs postnatal	human
3157.29	0.0424463	0.158885	0.26715	0.789353	0.83759	CYB5B	0.820927	postnatal	ROS	Forebrain/Cerebrum	prenatal vs postnatal	human
485.831	0.383724	0.344627	1.11345	0.265516	0.348089	CAV1	0.317399	postnatal	ROS	Forebrain/Cerebrum	prenatal vs postnatal	human
4818.42	-0.173108	0.141837	-1.22047	0.222287	0.299497	GBF1	0.275213	prenatal	ROS	Forebrain/Cerebrum	prenatal vs postnatal	human
10.6013	-0.37925	0.965404	-0.392841	0.694437	0.758638	UCP1	0.736953	prenatal	ROS	Forebrain/Cerebrum	prenatal vs postnatal	human
5299.55	0.414834	0.153831	2.69669	0.00700334	0.014245	CLCN3	0.0117475	postnatal	ROS	Forebrain/Cerebrum	prenatal vs postnatal	human
0.854679	-0.232091	1.91205	-0.121383	0.903387	0.927886	IFNG	0.912158	prenatal	ROS	Forebrain/Cerebrum	prenatal vs postnatal	human
6932.21	1.88876	0.303068	6.23214	4.60118254172478e-10	2.90885845307602e-09	SOD2	2.39261492169689e-09	postnatal	ROS	Forebrain/Cerebrum	prenatal vs postnatal	human
0.814607	1.63864	1.36177	1.20332	0.228854	0.307223	CCN6	0.28001	postnatal	ROS	Forebrain/Cerebrum	prenatal vs postnatal	human
0.893315	-0.0527559	1.43927	-0.0366546	0.97076	0.978422	AGXT2	0.97076	prenatal	ROS	Forebrain/Cerebrum	prenatal vs postnatal	human
2552.89	-0.418832	0.174042	-2.4065	0.0161064	0.0301388	PIKFYVE	0.0257702	prenatal	ROS	Forebrain/Cerebrum	prenatal vs postnatal	human
211.203	1.50976	0.212078	7.11891	1.08781931263778e-12	9.62071392094329e-12	SPR	7.54221390095526e-12	postnatal	ROS	Forebrain/Cerebrum	prenatal vs postnatal	human
7261.29	0.851835	0.144224	5.90633	3.49806425608589e-09	1.96201486916049e-08	PARK7	1.65363037560424e-08	postnatal	ROS	Forebrain/Cerebrum	prenatal vs postnatal	human
2.48698	4.7519	1.49603	3.17634	0.00149146	0.00348973	MMP8	0.00282022	postnatal	ROS	Forebrain/Cerebrum	prenatal vs postnatal	human
1994.93	-0.991109	0.179745	-5.51396	3.50841054976538e-08	1.72528123859122e-07	PKD2	1.21624899058533e-07	prenatal	ROS	Forebrain/Cerebrum	prenatal vs postnatal	human
1442.35	-1.21502	0.21191	-5.73367	9.82796907277065e-09	5.20281714385612e-08	WDR35	3.65038851274339e-08	prenatal	ROS	Forebrain/Cerebrum	prenatal vs postnatal	human
39518.2	4.16992	0.226337	18.4235	8.50593535240399e-76	3.63130531530344e-72	CLU	8.84617276650015e-74	postnatal	ROS	Forebrain/Cerebrum	prenatal vs postnatal	human
5092.28	3.57751	0.46457	7.70068	1.35342607510022e-14	1.53611032390031e-13	PTK2B	1.27960283464021e-13	postnatal	ROS	Forebrain/Cerebrum	prenatal vs postnatal	human
696.889	-0.815273	0.27354	-2.98045	0.00287821	0.00637128	ZNF205	0.00518003	prenatal	ROS	Forebrain/Cerebrum	prenatal vs postnatal	human
799.412	-1.7679	0.357291	-4.94807	7.49527845429783e-07	3.03179346681424e-06	PTGIS	2.29267340954993e-06	prenatal	ROS	Forebrain/Cerebrum	prenatal vs postnatal	human
18.4938	2.68375	0.43326	6.1943	5.85443469227341e-10	3.64715293608294e-09	IL1B	2.89933908569731e-09	postnatal	ROS	Forebrain/Cerebrum	prenatal vs postnatal	human
4063.43	0.131483	0.123795	1.0621	0.288192	0.372586	TRAP1	0.34059	postnatal	ROS	Forebrain/Cerebrum	prenatal vs postnatal	human
347.916	0.50415	0.36978	1.36338	0.172764	0.24199	KLF2	0.224593	postnatal	ROS	Forebrain/Cerebrum	prenatal vs postnatal	human
274.738	2.31175	0.365556	6.32391	2.55019113330807e-10	1.67383948666327e-09	TICAM1	1.47344376591133e-09	postnatal	ROS	Forebrain/Cerebrum	prenatal vs postnatal	human
1332.72	3.73799	0.275488	13.5686	6.14840737639983e-42	1.46991204829066e-39	ASS1	1.59858591786396e-40	postnatal	ROS	Forebrain/Cerebrum	prenatal vs postnatal	human
390.587	2.61262	0.348234	7.50247	6.26240919327286e-14	6.52303368183221e-13	RGN	5.00992735461829e-13	postnatal	ROS	Forebrain/Cerebrum	prenatal vs postnatal	human
143.667	1.01582	0.304433	3.33676	0.000847608	0.00208117	GCH1	0.00169522	postnatal	ROS	Forebrain/Cerebrum	prenatal vs postnatal	human
3938.82	0.375079	0.19726	1.90145	0.0572435	0.0931025	ROCK2	0.0862801	postnatal	ROS	Forebrain/Cerebrum	prenatal vs postnatal	human
408.894	0.550262	0.146378	3.75918	0.000170472	0.000475889	P2RX4	0.000377215	postnatal	ROS	Forebrain/Cerebrum	prenatal vs postnatal	human
171.421	-0.604759	0.414147	-1.46025	0.144221	0.207674	CD36	0.194792	prenatal	ROS	Forebrain/Cerebrum	prenatal vs postnatal	human
11504.4	0.548484	0.103357	5.30671	1.11620491378019e-07	5.09417648799744e-07	RAC1	3.74468745268193e-07	postnatal	ROS	Forebrain/Cerebrum	prenatal vs postnatal	human
3.23848	3.08011	0.636901	4.8361	1.32412357624461e-06	5.15840293996791e-06	IL10	3.82524588692886e-06	postnatal	ROS	Forebrain/Cerebrum	prenatal vs postnatal	human
276.737	0.437217	0.271815	1.60851	0.107724	0.161664	KLF4	0.149377	postnatal	ROS	Forebrain/Cerebrum	prenatal vs postnatal	human
239.576	1.53115	0.297202	5.15186	2.57913505100707e-07	1.11541059137909e-06	TLR4	8.38218891577299e-07	postnatal	ROS	Forebrain/Cerebrum	prenatal vs postnatal	human
22.5401	3.37385	0.582102	5.79598	6.79234090651251e-09	3.66725050858572e-08	DUOX1	2.64530163000289e-08	postnatal	ROS	Forebrain/Cerebrum	prenatal vs postnatal	human
108.425	1.47084	0.317759	4.62878	3.67832290964194e-06	1.34248903067587e-05	GCHFR	9.56363956506905e-06	postnatal	ROS	Forebrain/Cerebrum	prenatal vs postnatal	human
487.095	0.783746	0.639038	1.22645	0.220031	0.296925	CYP1B1	0.275213	postnatal	ROS	Forebrain/Cerebrum	prenatal vs postnatal	human
10.598	1.72491	0.392876	4.39047	1.13105484859257e-05	3.81667153289752e-05	DUOXA1	2.73557451752622e-05	postnatal	ROS	Forebrain/Cerebrum	prenatal vs postnatal	human
7.1542	0.359893	0.369157	0.974905	0.329608	0.416121	DUOX2	0.38088	postnatal	ROS	Forebrain/Cerebrum	prenatal vs postnatal	human
47.0201	2.98736	0.510084	5.8566	4.72448069579166e-09	2.60395391208112e-08	CYP1A1	2.04727496817639e-08	postnatal	ROS	Forebrain/Cerebrum	prenatal vs postnatal	human
0.816394	2.06668	1.20238	1.71882	0.0856472	0.13228	CYP1A2	0.122018	postnatal	ROS	Forebrain/Cerebrum	prenatal vs postnatal	human
9000.67	1.97006	0.159097	12.3828	3.2390470708066e-35	3.96703617475347e-33	SOD1	6.73721790727774e-34	postnatal	ROS	Forebrain/Cerebrum	prenatal vs postnatal	human
6856.47	-0.823328	0.142097	-5.79413	6.86761000096905e-09	3.70588041294617e-08	AKT1	2.64530163000289e-08	prenatal	ROS	Forebrain/Cerebrum	prenatal vs postnatal	human
7335.84	2.97926	0.303594	9.81332	9.86700055014421e-23	2.99724402784483e-21	SNCA	1.71028009535833e-21	postnatal	ROS	Forebrain/Cerebrum	prenatal vs postnatal	human
5896.79	1.08631	0.187171	5.80381	6.48257625496987e-09	3.51015236099873e-08	DDAH1	2.64530163000289e-08	postnatal	ROS	Forebrain/Cerebrum	prenatal vs postnatal	human
16.7209	0.428368	0.345509	1.23982	0.215043	0.291074	MPV17L	0.272737	postnatal	ROS	Forebrain/Cerebrum	prenatal vs postnatal	human
262.793	1.92741	0.308352	6.25068	4.08657039084278e-10	2.60223885701994e-09	ITGB2	2.23685958235605e-09	postnatal	ROS	Forebrain/Cerebrum	prenatal vs postnatal	human
2090.41	-0.2073	0.200065	-1.03617	0.300125	0.385396	ACOX1	0.350708	prenatal	ROS	Forebrain/Cerebrum	prenatal vs postnatal	human
235.594	-2.66816	0.554389	-4.81279	1.48836709538598e-06	5.75622651462593e-06	INAVA	4.07342573474057e-06	prenatal	ROS	Forebrain/Cerebrum	prenatal vs postnatal	human
483.275	-2.35414	0.625072	-3.76619	0.000165755	0.000463881	PTX3	0.00037475	prenatal	ROS	Forebrain/Cerebrum	prenatal vs postnatal	human
25.1605	0.189779	0.379466	0.500122	0.616989	0.691395	ZC3H12A	0.668405	postnatal	ROS	Forebrain/Cerebrum	prenatal vs postnatal	human
210.234	0.466333	0.273214	1.70684	0.0878514	0.135265	NOS3	0.123467	postnatal	ROS	Forebrain/Cerebrum	prenatal vs postnatal	human
20.2404	0.508138	0.803713	0.632239	0.527231	0.609802	SLC18A2	0.589592	postnatal	ROS	Forebrain/Cerebrum	prenatal vs postnatal	human
2352.28	0.542954	0.386618	1.40437	0.16021	0.22711	SMAD3	0.213613	postnatal	ROS	Forebrain/Cerebrum	prenatal vs postnatal	human
348.515	1.16355	0.424525	2.74082	0.00612862	0.0126396	CX3CR1	0.0104488	postnatal	ROS	Forebrain/Cerebrum	prenatal vs postnatal	human
2530.69	-0.516849	0.198638	-2.60196	0.0092692	0.0183822	INSR	0.0153015	prenatal	ROS	Forebrain/Cerebrum	prenatal vs postnatal	human
616.161	0.78529	0.173721	4.52041	6.17211391427244e-06	2.17560099332528e-05	SLC25A33	1.52833296924841e-05	postnatal	ROS	Forebrain/Cerebrum	prenatal vs postnatal	human
40.5967	2.94269	0.407219	7.22631	4.96304731715761e-13	4.58613809604014e-12	CLEC7A	3.68683514988851e-12	postnatal	ROS	Forebrain/Cerebrum	prenatal vs postnatal	human
440.617	0.844331	0.442344	1.90876	0.0562925	0.0917555	ABCD2	0.0860944	postnatal	ROS	Forebrain/Cerebrum	prenatal vs postnatal	human
888.732	0.350007	0.296737	1.17952	0.238192	0.318	CD34	0.288046	postnatal	ROS	Forebrain/Cerebrum	prenatal vs postnatal	human
29.9564	1.01011	0.33904	2.97932	0.00288886	0.00639345	TLR6	0.00518003	postnatal	ROS	Forebrain/Cerebrum	prenatal vs postnatal	human
10479.3	3.09457	0.628495	4.92378	8.48864728361024e-07	3.40548711804817e-06	GRIN1	2.5223409071299e-06	postnatal	ROS	Forebrain/Cerebrum	prenatal vs postnatal	human
1.35536	0.949214	1.2214	0.777152	0.437069	0.523628	AGTR2	0.494078	postnatal	ROS	Forebrain/Cerebrum	prenatal vs postnatal	human
447.091	1.50777	0.226416	6.65926	2.75201724286364e-11	2.0514163952541e-10	NQO1	1.68358701916364e-10	postnatal	ROS	Forebrain/Cerebrum	prenatal vs postnatal	human
4432.38	1.34312	0.366358	3.66615	0.000246231	0.00066688	ADGRB1	0.0005335	postnatal	ROS	Forebrain/Cerebrum	prenatal vs postnatal	human
512.641	0.740884	0.338819	2.18667	0.0287667	0.0507995	PPARA	0.0446528	postnatal	ROS	Forebrain/Cerebrum	prenatal vs postnatal	human
289.466	0.175401	0.294122	0.596355	0.550938	0.63137	SLC30A10	0.609548	postnatal	ROS	Forebrain/Cerebrum	prenatal vs postnatal	human
7156.11	0.938457	0.248294	3.77962	0.000157066	0.000441142	CD47	0.000362997	postnatal	ROS	Forebrain/Cerebrum	prenatal vs postnatal	human
8278.77	4.02474	0.220456	18.2565	1.83758683042423e-74	6.10160498226641e-71	SIRPA	9.555451518206e-73	postnatal	ROS	Forebrain/Cerebrum	prenatal vs postnatal	human
2061.17	-0.932243	0.267826	-3.48078	0.000499957	0.00128202	SLC5A3	0.00101952	prenatal	ROS	Forebrain/Cerebrum	prenatal vs postnatal	human
4462.73	-0.238955	0.174507	-1.36932	0.1709	0.239863	MTOR	0.224593	prenatal	ROS	Forebrain/Cerebrum	prenatal vs postnatal	human
1453.89	2.04945	0.289698	7.07445	1.50042827540549e-12	1.30916200240052e-11	NOS1AP	9.75278379013569e-12	postnatal	ROS	Forebrain/Cerebrum	prenatal vs postnatal	human
3228.7	-3.1491	0.33073	-9.52167	1.70414099189337e-21	4.46724117559136e-20	DDAH2	2.53186661652729e-20	prenatal	ROS	Forebrain/Cerebrum	prenatal vs postnatal	human
1964.56	0.97577	0.615459	1.58543	0.112868	0.168243	HBB	0.154451	postnatal	ROS	Forebrain/Cerebrum	prenatal vs postnatal	human
726.52	0.426062	0.154582	2.75623	0.00584723	0.0121102	COA8	0.0101352	postnatal	ROS	Forebrain/Cerebrum	prenatal vs postnatal	human
909.576	0.0292882	0.135268	0.21652	0.828583	0.87001	NDUFAF7	0.834465	postnatal	Assembly factors	Forebrain/Cerebrum	prenatal vs postnatal	human
549.262	-0.320177	0.153354	-2.08783	0.0368132	0.063193	COX10	0.0598215	prenatal	Assembly factors	Forebrain/Cerebrum	prenatal vs postnatal	human
1686.64	-0.522384	0.145738	-3.58439	0.000337865	0.000892886	COX15	0.000775102	prenatal	Assembly factors	Forebrain/Cerebrum	prenatal vs postnatal	human
1175.76	-0.263694	0.123005	-2.14376	0.0320518	0.0559092	BCS1L	0.0543487	prenatal	Assembly factors	Forebrain/Cerebrum	prenatal vs postnatal	human
2408.85	0.900049	0.122304	7.35912	1.8512816305348e-13	1.81508202909783e-12	UQCC1	1.80499958977143e-12	postnatal	Assembly factors	Forebrain/Cerebrum	prenatal vs postnatal	human
1221.66	0.384712	0.165581	2.3234	0.0201575	0.0369086	NDUFAF5	0.0374353	postnatal	Assembly factors	Forebrain/Cerebrum	prenatal vs postnatal	human
2048.74	-0.0916566	0.186423	-0.49166	0.622959	0.696961	COA1	0.714571	prenatal	Assembly factors	Forebrain/Cerebrum	prenatal vs postnatal	human
2227.75	0.328515	0.149353	2.19959	0.027836	0.0493446	FOXRED1	0.0493456	postnatal	Assembly factors	Forebrain/Cerebrum	prenatal vs postnatal	human
1675.45	0.395008	0.143102	2.76032	0.00577441	0.0119735	TIMMDC1	0.0118527	postnatal	Assembly factors	Forebrain/Cerebrum	prenatal vs postnatal	human
4005.77	1.01197	0.205727	4.91896	8.70030823093275e-07	3.48338707359585e-06	ATPAF1	2.82760017505314e-06	postnatal	Assembly factors	Forebrain/Cerebrum	prenatal vs postnatal	human
1614.57	1.20476	0.200134	6.01977	1.74668669396348e-09	1.02068801647252e-08	NDUFAF4	1.13534635107626e-08	postnatal	Assembly factors	Forebrain/Cerebrum	prenatal vs postnatal	human
1826.06	0.398777	0.204141	1.95344	0.0507673	0.0838332	ECSIT	0.0747385	postnatal	Assembly factors	Forebrain/Cerebrum	prenatal vs postnatal	human
1415.84	0.0295284	0.141299	0.208978	0.834465	0.874497	SCO1	0.834465	postnatal	Assembly factors	Forebrain/Cerebrum	prenatal vs postnatal	human
2103.37	0.263985	0.142034	1.8586	0.0630843	0.101421	UQCC2	0.0878674	postnatal	Assembly factors	Forebrain/Cerebrum	prenatal vs postnatal	human
789.23	1.1764	0.127038	9.26023	2.03983566459388e-20	4.69995751740351e-19	NDUFAF1	2.65178636397205e-19	postnatal	Assembly factors	Forebrain/Cerebrum	prenatal vs postnatal	human
723.899	1.48385	0.153822	9.6465	5.08624901422756e-22	1.42053706113249e-20	COX17	1.98363711554875e-20	postnatal	Assembly factors	Forebrain/Cerebrum	prenatal vs postnatal	human
620.915	0.81159	0.200111	4.05571	4.99831364290855e-05	0.000152387	SURF1	0.000121834	postnatal	Assembly factors	Forebrain/Cerebrum	prenatal vs postnatal	human
587.896	-0.0457577	0.187057	-0.244619	0.806751	0.851903	NUBPL	0.834465	prenatal	Assembly factors	Forebrain/Cerebrum	prenatal vs postnatal	human
679.496	0.825965	0.16315	5.0626	4.13581209547791e-07	1.7356355660899e-06	SDHAF4	1.46633337930581e-06	postnatal	Assembly factors	Forebrain/Cerebrum	prenatal vs postnatal	human
842.077	0.102005	0.12003	0.849832	0.395418	0.483616	NDUFAF6	0.467313	postnatal	Assembly factors	Forebrain/Cerebrum	prenatal vs postnatal	human
1603.73	0.0793409	0.215723	0.36779	0.71303	0.774589	COA7	0.794519	postnatal	Assembly factors	Forebrain/Cerebrum	prenatal vs postnatal	human
808.762	-0.528122	0.0933779	-5.65575	1.5516360155607e-08	7.99329265454508e-08	COX18	8.64482922955248e-08	prenatal	Assembly factors	Forebrain/Cerebrum	prenatal vs postnatal	human
707.029	0.648282	0.12298	5.27145	1.35350108312577e-07	6.11274389725411e-07	NDUFAF2	5.27865422419049e-07	postnatal	Assembly factors	Forebrain/Cerebrum	prenatal vs postnatal	human
1934.58	0.140684	0.151904	0.926139	0.354374	0.442139	COX11	0.431893	postnatal	Assembly factors	Forebrain/Cerebrum	prenatal vs postnatal	human
242.626	0.276369	0.187972	1.47027	0.14149	0.204316	SDHAF2	0.183937	postnatal	Assembly factors	Forebrain/Cerebrum	prenatal vs postnatal	human
718.656	1.12278	0.202026	5.55763	2.73466161908424e-08	1.36431765984497e-07	COA6	1.33314753930357e-07	postnatal	Assembly factors	Forebrain/Cerebrum	prenatal vs postnatal	human
1339.62	0.930358	0.202947	4.58425	4.55618624866185e-06	1.63748731034288e-05	TMEM126B	1.18460842465208e-05	postnatal	Assembly factors	Forebrain/Cerebrum	prenatal vs postnatal	human
532.899	-0.410719	0.0881934	-4.65703	3.20802538786893e-06	1.18152120644658e-05	ATPAF2	8.93664215192059e-06	prenatal	Assembly factors	Forebrain/Cerebrum	prenatal vs postnatal	human
1759.23	0.22206	0.16252	1.36636	0.171826	0.240892	ACAD9	0.216168	postnatal	Assembly factors	Forebrain/Cerebrum	prenatal vs postnatal	human
1201.28	1.15155	0.214307	5.37337	7.72784159831391e-08	3.61124031781099e-07	NDUFAF3	3.34873135926936e-07	postnatal	Assembly factors	Forebrain/Cerebrum	prenatal vs postnatal	human
646.822	2.06622	0.219425	9.41649	4.66431121813615e-21	1.1577099372324e-19	COX14	9.09540687536549e-20	postnatal	Assembly factors	Forebrain/Cerebrum	prenatal vs postnatal	human
959.915	-0.322549	0.165812	-1.94527	0.0517421	0.0852168	COA4	0.0747385	prenatal	Assembly factors	Forebrain/Cerebrum	prenatal vs postnatal	human
1644.49	0.3053	0.120914	2.52493	0.0115722	0.0224328	COA5	0.0225658	postnatal	Assembly factors	Forebrain/Cerebrum	prenatal vs postnatal	human
2082.87	0.73621	0.153236	4.80441	1.55206622502936e-06	5.98785787100147e-06	COA3	4.65619867508808e-06	postnatal	Assembly factors	Forebrain/Cerebrum	prenatal vs postnatal	human
375.556	-0.0665352	0.219115	-0.303654	0.761392	0.814309	SDHAF3	0.824841	prenatal	Assembly factors	Forebrain/Cerebrum	prenatal vs postnatal	human
3027.42	-0.402547	0.218779	-1.83997	0.065773	0.105183	COX20	0.0884533	prenatal	Assembly factors	Forebrain/Cerebrum	prenatal vs postnatal	human
398.443	0.425015	0.214813	1.97853	0.0478686	0.079592	UQCC3	0.0746751	postnatal	Assembly factors	Forebrain/Cerebrum	prenatal vs postnatal	human
540.317	1.08831	0.180039	6.04485	1.49546210054751e-09	8.826859453439e-09	SDHAF1	1.13534635107626e-08	postnatal	Assembly factors	Forebrain/Cerebrum	prenatal vs postnatal	human
623.442	0.255288	0.0908911	2.80872	0.0049739	0.0104647	COX19	0.0107768	postnatal	Assembly factors	Forebrain/Cerebrum	prenatal vs postnatal	human
2291.46	0.805529	0.172515	4.66934	3.02169110607524e-06	1.11730038374106e-05	NDUFAB1	4.33546984784708e-06	postnatal	Structural factors	Forebrain/Cerebrum	prenatal vs postnatal	human
6243.76	0.560473	0.185792	3.01667	0.0025557	0.00571323	UQCRC1	0.00285892	postnatal	Structural factors	Forebrain/Cerebrum	prenatal vs postnatal	human
1377.75	0.587519	0.234186	2.50877	0.0121153	0.0233855	NDUFS1	0.012897	postnatal	Structural factors	Forebrain/Cerebrum	prenatal vs postnatal	human
2964.64	0.745241	0.161216	4.62263	3.78907580511146e-06	1.37903716185545e-05	NDUFB4	5.20997923202825e-06	postnatal	Structural factors	Forebrain/Cerebrum	prenatal vs postnatal	human
4188.22	0.956243	0.158701	6.02546	1.68634162036181e-09	9.86582478130234e-09	SDHA	3.59027570786708e-09	postnatal	Structural factors	Forebrain/Cerebrum	prenatal vs postnatal	human
2803.64	1.35326	0.176832	7.65282	1.96618446531294e-14	2.18510437193796e-13	NDUFB2	7.20934303948077e-14	postnatal	Structural factors	Forebrain/Cerebrum	prenatal vs postnatal	human
1963.73	1.07564	0.228911	4.69893	2.61525462624927e-06	9.77172658800117e-06	NDUFB7	3.8357067851656e-06	postnatal	Structural factors	Forebrain/Cerebrum	prenatal vs postnatal	human
1506.08	1.115	0.133197	8.37106	5.71041684338596e-17	8.73337241288362e-16	NDUFC1	2.69205365473909e-16	postnatal	Structural factors	Forebrain/Cerebrum	prenatal vs postnatal	human
2025.74	0.585722	0.201728	2.90352	0.00368996	0.00798645	NDUFS8	0.00405896	postnatal	Structural factors	Forebrain/Cerebrum	prenatal vs postnatal	human
3449.03	1.83618	0.189716	9.67855	3.71955766046334e-22	1.06368670933289e-20	COX6A1	4.09151342650968e-21	postnatal	Structural factors	Forebrain/Cerebrum	prenatal vs postnatal	human
4963.76	1.00787	0.178539	5.64513	1.65054645513023e-08	8.4663457372317e-08	COX7A2	2.79323246252809e-08	postnatal	Structural factors	Forebrain/Cerebrum	prenatal vs postnatal	human
2227.96	0.641067	0.26971	2.37688	0.01746	0.0324184	NDUFS7	0.0182914	postnatal	Structural factors	Forebrain/Cerebrum	prenatal vs postnatal	human
2119.82	1.2897	0.139326	9.25676	2.10734563872933e-20	4.84803056718918e-19	SDHB	1.39084812156136e-19	postnatal	Structural factors	Forebrain/Cerebrum	prenatal vs postnatal	human
1330.36	1.30717	0.173782	7.52187	5.39988838269055e-14	5.65616068798894e-13	NDUFB3	1.69710777741703e-13	postnatal	Structural factors	Forebrain/Cerebrum	prenatal vs postnatal	human
2440.92	1.54546	0.184204	8.38994	4.86372175749764e-17	7.49600108308713e-16	NDUFA8	2.46927412303726e-16	postnatal	Structural factors	Forebrain/Cerebrum	prenatal vs postnatal	human
3172.58	1.99811	0.181422	11.0136	3.28461597940363e-28	1.93604465342206e-26	NDUFA1	1.0839232732032e-26	postnatal	Structural factors	Forebrain/Cerebrum	prenatal vs postnatal	human
5445.85	1.38018	0.177394	7.78033	7.23384574715054e-15	8.53102787323783e-14	COX6B1	2.80843423124668e-14	postnatal	Structural factors	Forebrain/Cerebrum	prenatal vs postnatal	human
7821.58	0.752863	0.132945	5.66298	1.48766302558283e-08	7.68625896551129e-08	COX7C	2.58383578127544e-08	postnatal	Structural factors	Forebrain/Cerebrum	prenatal vs postnatal	human
933.8	1.03039	0.166555	6.18648	6.15223489736004e-10	3.82629318777747e-09	UQCR11	1.35349167741921e-09	postnatal	Structural factors	Forebrain/Cerebrum	prenatal vs postnatal	human
6132.46	1.20896	0.154988	7.80037	6.17249721293372e-15	7.35482084175883e-14	NDUFA5	2.54615510033516e-14	postnatal	Structural factors	Forebrain/Cerebrum	prenatal vs postnatal	human
5743.07	0.747868	0.141397	5.28912	1.22904261818907e-07	5.5835678932749e-07	NDUFA10	1.93135268572569e-07	postnatal	Structural factors	Forebrain/Cerebrum	prenatal vs postnatal	human
20.6486	2.93523	0.435474	6.7403	1.58062876982265e-11	1.21646948641205e-10	COX4I2	4.01236533878057e-11	postnatal	Structural factors	Forebrain/Cerebrum	prenatal vs postnatal	human
13463.6	1.56068	0.198026	7.88122	3.24193392653101e-15	4.03003134194895e-14	COX4I1	1.42645092767365e-14	postnatal	Structural factors	Forebrain/Cerebrum	prenatal vs postnatal	human
3943.53	1.54461	0.164453	9.39241	5.86432649287278e-21	1.4435711113098e-19	COX7B	4.30050609477337e-20	postnatal	Structural factors	Forebrain/Cerebrum	prenatal vs postnatal	human
1479.78	1.10239	0.185432	5.945	2.76463963991165e-09	1.57248745715873e-08	NDUFA2	5.70206925731777e-09	postnatal	Structural factors	Forebrain/Cerebrum	prenatal vs postnatal	human
4117.43	1.69164	0.221507	7.63697	2.22389049652433e-14	2.45870305579479e-13	COX5B	7.3388386385303e-14	postnatal	Structural factors	Forebrain/Cerebrum	prenatal vs postnatal	human
2883.1	1.29449	0.174031	7.4383	1.01986083235523e-13	1.03524188566928e-12	NDUFB5	3.05958249706569e-13	postnatal	Structural factors	Forebrain/Cerebrum	prenatal vs postnatal	human
918.042	1.25451	0.214283	5.85446	4.78569160387433e-09	2.6352608787577e-08	NDUFA9	8.77376794043627e-09	postnatal	Structural factors	Forebrain/Cerebrum	prenatal vs postnatal	human
7919.56	0.700818	0.123418	5.67841	1.35951291308797e-08	7.06568415560364e-08	UQCRC2	2.42507708821097e-08	postnatal	Structural factors	Forebrain/Cerebrum	prenatal vs postnatal	human
2605.27	1.06546	0.180431	5.90506	3.52514558451023e-09	1.97535065905689e-08	NDUFB10	7.05029116902047e-09	postnatal	Structural factors	Forebrain/Cerebrum	prenatal vs postnatal	human
3021.63	0.558405	0.170643	3.27237	0.00106651	0.00257341	SDHC	0.00121362	postnatal	Structural factors	Forebrain/Cerebrum	prenatal vs postnatal	human
1537.57	0.715709	0.205566	3.48164	0.000498345	0.00127822	NDUFS6	0.000587335	postnatal	Structural factors	Forebrain/Cerebrum	prenatal vs postnatal	human
3352.41	-0.0824299	0.214566	-0.38417	0.700853	0.764195	NDUFB11	0.700853	prenatal	Structural factors	Forebrain/Cerebrum	prenatal vs postnatal	human
4187.48	1.81353	0.208272	8.70752	3.10595555957317e-18	5.49871895392681e-17	NDUFB9	1.70827555776524e-17	postnatal	Structural factors	Forebrain/Cerebrum	prenatal vs postnatal	human
1621.23	1.08105	0.183564	5.8892	3.88074158936185e-09	2.16446587638092e-08	NDUFC2	7.53320426170242e-09	postnatal	Structural factors	Forebrain/Cerebrum	prenatal vs postnatal	human
7771.56	1.23411	0.138263	8.92582	4.42404182015543e-19	8.65236032418357e-18	UQCRB	2.65442509209326e-18	postnatal	Structural factors	Forebrain/Cerebrum	prenatal vs postnatal	human
4.52692	2.70821	0.736627	3.6765	0.000236458	0.000642857	COX6A2	0.000289004	postnatal	Structural factors	Forebrain/Cerebrum	prenatal vs postnatal	human
5804.43	0.79314	0.143226	5.53769	3.06494213211631e-08	1.51736333029764e-07	NDUFS2	4.93380928584576e-08	postnatal	Structural factors	Forebrain/Cerebrum	prenatal vs postnatal	human
1578.58	0.654419	0.140892	4.64484	3.40337628528943e-06	1.24869855014843e-05	NDUFV3	4.77920925168303e-06	postnatal	Structural factors	Forebrain/Cerebrum	prenatal vs postnatal	human
12.3729	-0.322251	0.461135	-0.698822	0.484663	0.56929	COX6B2	0.499809	prenatal	Structural factors	Forebrain/Cerebrum	prenatal vs postnatal	human
456.471	4.38288	0.419	10.4603	1.31394807389534e-25	5.69072815076643e-24	COX7A1	2.89068576256975e-24	postnatal	Structural factors	Forebrain/Cerebrum	prenatal vs postnatal	human
1924.88	0.546833	0.121263	4.50949	6.4984604355392e-06	2.2822280543717e-05	NDUFS4	8.75302834174668e-06	postnatal	Structural factors	Forebrain/Cerebrum	prenatal vs postnatal	human
2923.83	1.18554	0.201672	5.87854	4.1389668427758e-09	2.29776862585012e-08	UQCRQ	7.80490890352008e-09	postnatal	Structural factors	Forebrain/Cerebrum	prenatal vs postnatal	human
5560.43	1.80448	0.186868	9.65647	4.61514158352434e-22	1.29744958684893e-20	COX6C	4.35141920732295e-21	postnatal	Structural factors	Forebrain/Cerebrum	prenatal vs postnatal	human
1550.41	1.08621	0.146695	7.40451	1.31639759838382e-13	1.31701459089729e-12	NDUFB6	3.77748876057965e-13	postnatal	Structural factors	Forebrain/Cerebrum	prenatal vs postnatal	human
951.087	1.18004	0.232897	5.06678	4.04591319870853e-07	1.70005722764631e-06	NDUFB8	6.06886979806279e-07	postnatal	Structural factors	Forebrain/Cerebrum	prenatal vs postnatal	human
6998.27	0.854913	0.195738	4.36764	1.25595852371732e-05	4.21293798661672e-05	NDUFV1	1.62535808951653e-05	postnatal	Structural factors	Forebrain/Cerebrum	prenatal vs postnatal	human
5977.09	1.22577	0.160432	7.64045	2.16456393665428e-14	2.39488443846637e-13	NDUFS5	7.3388386385303e-14	postnatal	Structural factors	Forebrain/Cerebrum	prenatal vs postnatal	human
2915.93	1.08003	0.155163	6.96057	3.38890673661521e-12	2.83839935305518e-11	UQCRFS1	9.31949352569182e-12	postnatal	Structural factors	Forebrain/Cerebrum	prenatal vs postnatal	human
2.1064	4.51524	1.31538	3.43266	0.000597689	0.00150907	COX7B2	0.000692061	postnatal	Structural factors	Forebrain/Cerebrum	prenatal vs postnatal	human
1625.32	1.93181	0.193937	9.96098	2.25829830719568e-23	7.43248751236075e-22	NDUFA3	2.98095376549829e-22	postnatal	Structural factors	Forebrain/Cerebrum	prenatal vs postnatal	human
6005.56	0.985013	0.144525	6.81551	9.3929870809172e-12	7.44364958700954e-11	UQCRH	2.47974858936214e-11	postnatal	Structural factors	Forebrain/Cerebrum	prenatal vs postnatal	human
606.853	0.103147	0.25519	0.404195	0.68607	0.75142	NDUFA11	0.696625	postnatal	Structural factors	Forebrain/Cerebrum	prenatal vs postnatal	human
2934.39	1.0983	0.197246	5.56816	2.57436398490052e-08	1.28972830385192e-07	COX8A	4.24770057508586e-08	postnatal	Structural factors	Forebrain/Cerebrum	prenatal vs postnatal	human
49.0937	-1.64349	0.389382	-4.22077	2.43472725888266e-05	7.83116880900327e-05	NDUFV2	3.09023075165876e-05	prenatal	Structural factors	Forebrain/Cerebrum	prenatal vs postnatal	human
3848.37	0.951678	0.150766	6.31228	2.74956532990012e-10	1.79562959612621e-09	COX5A	6.25763144046235e-10	postnatal	Structural factors	Forebrain/Cerebrum	prenatal vs postnatal	human
3279.77	0.835402	0.162476	5.14168	2.72289121665696e-07	1.17367490434987e-06	CYC1	4.17932140231068e-07	postnatal	Structural factors	Forebrain/Cerebrum	prenatal vs postnatal	human
1958.08	1.17115	0.183492	6.3826	1.74110050110458e-10	1.17002580110207e-09	NDUFB1	4.25602344714453e-10	postnatal	Structural factors	Forebrain/Cerebrum	prenatal vs postnatal	human
3066.59	1.28883	0.124336	10.3657	3.55034837829167e-25	1.44351851614787e-23	UQCR10	5.85807482418125e-24	postnatal	Structural factors	Forebrain/Cerebrum	prenatal vs postnatal	human
2139.97	1.19422	0.12584	9.48997	2.31091130360713e-21	5.95338563767203e-20	NDUFA12	1.90650182547588e-20	postnatal	Structural factors	Forebrain/Cerebrum	prenatal vs postnatal	human
973.956	0.598261	0.169908	3.52109	0.000429771	0.00111438	NDUFA6	0.000515725	postnatal	Structural factors	Forebrain/Cerebrum	prenatal vs postnatal	human
145.857	-0.84949	0.212666	-3.99447	6.48388234133901e-05	0.000194425	NDUFA13	8.07426857600707e-05	prenatal	Structural factors	Forebrain/Cerebrum	prenatal vs postnatal	human
11899.3	2.29663	0.201938	11.3729	5.70508371486597e-30	4.08850651642817e-28	NDUFA4	3.76535525181154e-28	postnatal	Structural factors	Forebrain/Cerebrum	prenatal vs postnatal	human
1071.07	0.596409	0.210003	2.84	0.00451135	0.00958258	SDHD	0.00488114	postnatal	Structural factors	Forebrain/Cerebrum	prenatal vs postnatal	human
3199.27	0.971978	0.15301	6.35239	2.11990823272151e-10	1.40718208855286e-09	NDUFS3	4.99692654855786e-10	postnatal	Structural factors	Forebrain/Cerebrum	prenatal vs postnatal	human
17.2942	1.017	0.22727	4.47486	7.646253647703e-06	2.65297392323182e-05	NDUFA7	1.0093054814968e-05	postnatal	Structural factors	Forebrain/Cerebrum	prenatal vs postnatal	human
199.842	-5.2186	0.524677	-9.9463	2.61721135058001e-23	8.54784087439706e-22	SLC4A1	3.22789399904868e-22	prenatal	Glycolysis	Forebrain/Cerebrum	prenatal vs postnatal	human
543.284	6.18456	0.436068	14.1826	1.17490074156932e-45	3.58272793480179e-43	MLXIPL	6.52069911570973e-44	postnatal	Glycolysis	Forebrain/Cerebrum	prenatal vs postnatal	human
272.538	2.48606	0.464702	5.34979	8.8057678993773e-08	4.08113473798063e-07	IGF1	1.99477599353241e-07	postnatal	Glycolysis	Forebrain/Cerebrum	prenatal vs postnatal	human
3200.6	-2.40624	0.298253	-8.06777	7.15925061036805e-16	9.67210873599632e-15	NUP160	3.97338408875427e-15	prenatal	Glycolysis	Forebrain/Cerebrum	prenatal vs postnatal	human
6511.66	-1.24613	0.200276	-6.22204	4.90727477395499e-10	3.08929849051761e-09	TPR	1.43344078923422e-09	prenatal	Glycolysis	Forebrain/Cerebrum	prenatal vs postnatal	human
1575.6	-1.65431	0.247005	-6.69747	2.12053761994093e-11	1.60512021870098e-10	NDC1	7.35561486917011e-11	prenatal	Glycolysis	Forebrain/Cerebrum	prenatal vs postnatal	human
4366.44	2.35778	0.297418	7.92751	2.23585769736217e-15	2.84446025661861e-14	PFKP	1.18181049717715e-14	postnatal	Glycolysis	Forebrain/Cerebrum	prenatal vs postnatal	human
34493.8	0.818269	0.254905	3.2101	0.00132689	0.00313982	PKM	0.00219828	postnatal	Glycolysis	Forebrain/Cerebrum	prenatal vs postnatal	human
1801.84	-0.0735216	0.151689	-0.484688	0.627898	0.701469	HDAC4	0.67016	prenatal	Glycolysis	Forebrain/Cerebrum	prenatal vs postnatal	human
2938.91	-0.581421	0.141615	-4.10563	4.03207856333703e-05	0.000124697	NUP133	7.33706099230182e-05	prenatal	Glycolysis	Forebrain/Cerebrum	prenatal vs postnatal	human
25787.7	0.367185	0.239773	1.53139	0.125674	0.184448	ENO1	0.149083	postnatal	Glycolysis	Forebrain/Cerebrum	prenatal vs postnatal	human
395.41	-1.8853	0.305401	-6.17319	6.69254892090677e-10	4.13993235256423e-09	NUP37	1.90480238518116e-09	prenatal	Glycolysis	Forebrain/Cerebrum	prenatal vs postnatal	human
440.477	0.422782	0.230519	1.83404	0.0666474	0.106422	TIGAR	0.0840666	postnatal	Glycolysis	Forebrain/Cerebrum	prenatal vs postnatal	human
1478.55	0.821935	0.229076	3.58805	0.000333158	0.000881227	PGM1	0.000577821	postnatal	Glycolysis	Forebrain/Cerebrum	prenatal vs postnatal	human
1215.85	2.51641	0.347841	7.23437	4.67697348649026e-13	4.3325069953588e-12	SLC4A4	1.99670791154007e-12	postnatal	Glycolysis	Forebrain/Cerebrum	prenatal vs postnatal	human
3345.07	0.0552738	0.159672	0.346172	0.729214	0.787533	PSEN1	0.767966	postnatal	Glycolysis	Forebrain/Cerebrum	prenatal vs postnatal	human
52.8592	1.12935	0.439524	2.56947	0.0101853	0.0199893	GCKR	0.0141321	postnatal	Glycolysis	Forebrain/Cerebrum	prenatal vs postnatal	human
2291.28	0.141352	0.158783	0.89022	0.373348	0.461142	SEH1L	0.418602	postnatal	Glycolysis	Forebrain/Cerebrum	prenatal vs postnatal	human
762.041	4.68399	0.39084	11.9844	4.28926496429477e-33	4.34509810823677e-31	P2RX7	1.58702803678906e-31	postnatal	Glycolysis	Forebrain/Cerebrum	prenatal vs postnatal	human
3035.91	-0.698618	0.156746	-4.45701	8.31088198974106e-06	2.8642878258727e-05	NUP50	1.64733553725225e-05	prenatal	Glycolysis	Forebrain/Cerebrum	prenatal vs postnatal	human
2285.63	-0.854074	0.145826	-5.85682	4.71809544035733e-09	2.60091429883118e-08	AAAS	1.19024680427196e-08	prenatal	Glycolysis	Forebrain/Cerebrum	prenatal vs postnatal	human
2699.62	-1.72144	0.185243	-9.29288	1.5016322095387e-20	3.5251199489281e-19	NUP188	1.28216288660612e-19	prenatal	Glycolysis	Forebrain/Cerebrum	prenatal vs postnatal	human
4620.12	-1.24168	0.230138	-5.39537	6.83814367491015e-08	3.21660767481529e-07	EP300	1.58132072482297e-07	prenatal	Glycolysis	Forebrain/Cerebrum	prenatal vs postnatal	human
4675.89	-1.21636	0.234638	-5.18401	2.17162079023306e-07	9.49615389161909e-07	HIF1A	4.66520649519584e-07	prenatal	Glycolysis	Forebrain/Cerebrum	prenatal vs postnatal	human
2215.96	-0.517684	0.111174	-4.65653	3.21583233798016e-06	1.18410465239279e-05	RAE1	6.61032202807033e-06	prenatal	Glycolysis	Forebrain/Cerebrum	prenatal vs postnatal	human
11773	1.15321	0.169117	6.819	9.16768068907785e-12	7.27861237280559e-11	PGK1	3.28262114996013e-11	postnatal	Glycolysis	Forebrain/Cerebrum	prenatal vs postnatal	human
1130.87	4.01987	0.456788	8.8003	1.36445851890332e-18	2.52323504819968e-17	HTR2A	8.9091115057805e-18	postnatal	Glycolysis	Forebrain/Cerebrum	prenatal vs postnatal	human
4229.74	-1.144	0.171057	-6.68781	2.26531712771899e-11	1.70778852282428e-10	NUP93	7.61970306596389e-11	prenatal	Glycolysis	Forebrain/Cerebrum	prenatal vs postnatal	human
10859.4	1.4817	0.150332	9.85617	6.44630028251423e-23	2.00250766780307e-21	GPI	7.1553933135908e-22	postnatal	Glycolysis	Forebrain/Cerebrum	prenatal vs postnatal	human
11.1796	4.94138	0.744664	6.63571	3.22939545352488e-11	2.38702086898683e-10	GAPDHS	1.05430263335665e-10	postnatal	Glycolysis	Forebrain/Cerebrum	prenatal vs postnatal	human
4030.53	0.48402	0.169401	2.85725	0.00427331	0.00912756	OGDH	0.00640997	postnatal	Glycolysis	Forebrain/Cerebrum	prenatal vs postnatal	human
1734.66	1.26214	0.295091	4.27712	1.89324518643161e-05	6.18606376025829e-05	PRKAG2	3.62327958092947e-05	postnatal	Glycolysis	Forebrain/Cerebrum	prenatal vs postnatal	human
202.776	0.65062	0.337422	1.92821	0.053829	0.0882164	GCK	0.0702943	postnatal	Glycolysis	Forebrain/Cerebrum	prenatal vs postnatal	human
7125.36	0.874894	0.203802	4.29285	1.76391224865917e-05	5.78498174263945e-05	GIT1	3.43498701054681e-05	postnatal	Glycolysis	Forebrain/Cerebrum	prenatal vs postnatal	human
300.152	-0.343766	0.254297	-1.35183	0.17643	0.246249	GALK1	0.203998	prenatal	Glycolysis	Forebrain/Cerebrum	prenatal vs postnatal	human
207.485	-0.933906	0.393815	-2.37143	0.0177192	0.0328609	ENO3	0.0242818	prenatal	Glycolysis	Forebrain/Cerebrum	prenatal vs postnatal	human
1752.18	-1.14152	0.123719	-9.22676	2.78937769425856e-20	6.31498204660778e-19	NUP88	2.06413949375133e-19	prenatal	Glycolysis	Forebrain/Cerebrum	prenatal vs postnatal	human
12277.4	4.96907	0.280279	17.729	2.50438204657999e-70	6.8037230072724e-67	ALDOC	2.77986407170379e-68	postnatal	Glycolysis	Forebrain/Cerebrum	prenatal vs postnatal	human
666.497	1.90208	0.270412	7.034	2.00690639486188e-12	1.72737300414898e-11	PPARGC1A	7.9559503510596e-12	postnatal	Glycolysis	Forebrain/Cerebrum	prenatal vs postnatal	human
2991.74	-1.29881	0.245765	-5.28478	1.25854987878605e-07	5.70980789094313e-07	NUP98	2.79398073090504e-07	prenatal	Glycolysis	Forebrain/Cerebrum	prenatal vs postnatal	human
0.854679	-0.232091	1.91205	-0.121383	0.903387	0.927886	IFNG	0.919963	prenatal	Glycolysis	Forebrain/Cerebrum	prenatal vs postnatal	human
1935.22	-2.34463	0.245698	-9.54272	1.39139834027922e-21	3.69604871119147e-20	NUP107	1.28704346475827e-20	prenatal	Glycolysis	Forebrain/Cerebrum	prenatal vs postnatal	human
97009.3	0.695023	0.165295	4.20475	2.61372875737908e-05	8.35476202647517e-05	GAPDH	4.91735410286573e-05	postnatal	Glycolysis	Forebrain/Cerebrum	prenatal vs postnatal	human
20968.6	1.33975	0.214484	6.24641	4.20005212554841e-10	2.66598041036297e-09	TPI1	1.26001563766452e-09	postnatal	Glycolysis	Forebrain/Cerebrum	prenatal vs postnatal	human
27363.9	1.82581	0.280508	6.50892	7.56915036296035e-11	5.31851609326845e-10	ENO2	2.33382136191278e-10	postnatal	Glycolysis	Forebrain/Cerebrum	prenatal vs postnatal	human
1769.01	-1.83351	0.245926	-7.45553	8.95083197613253e-14	9.15736606555099e-13	NUP155	4.1397597889613e-13	prenatal	Glycolysis	Forebrain/Cerebrum	prenatal vs postnatal	human
824.898	-1.34819	0.182907	-7.3709	1.69478725811519e-13	1.67041630677818e-12	PFKFB4	7.52485542603144e-13	prenatal	Glycolysis	Forebrain/Cerebrum	prenatal vs postnatal	human
53.1794	-1.56189	0.473421	-3.29915	0.000969792	0.00235869	ESRRB	0.00163101	prenatal	Glycolysis	Forebrain/Cerebrum	prenatal vs postnatal	human
1373.03	-1.57472	0.192428	-8.18345	2.75822222441187e-16	3.91389900068016e-15	NUP43	1.61138245741957e-15	prenatal	Glycolysis	Forebrain/Cerebrum	prenatal vs postnatal	human
6.37168	0.981265	0.523363	1.87492	0.0608036	0.0981715	MYOG	0.077744	postnatal	Glycolysis	Forebrain/Cerebrum	prenatal vs postnatal	human
870.795	1.77775	0.192353	9.24214	2.41605929269612e-20	5.51156609946036e-19	PFKFB2	1.91558986778049e-19	postnatal	Glycolysis	Forebrain/Cerebrum	prenatal vs postnatal	human
3092.31	-1.50801	0.215794	-6.98819	2.78450971347991e-12	2.35395440672231e-11	NUP153	1.03026859398757e-11	prenatal	Glycolysis	Forebrain/Cerebrum	prenatal vs postnatal	human
1812.63	-0.865275	0.152727	-5.66549	1.46608642139908e-08	7.58264565889411e-08	NUP85	3.53773027772387e-08	prenatal	Glycolysis	Forebrain/Cerebrum	prenatal vs postnatal	human
2684.14	-0.91628	0.162623	-5.63437	1.75700794573615e-08	8.97852692379944e-08	NUP214	4.14952940375984e-08	prenatal	Glycolysis	Forebrain/Cerebrum	prenatal vs postnatal	human
946.844	-0.989106	0.333143	-2.96901	0.0029876	0.00659245	CBFA2T3	0.00467076	prenatal	Glycolysis	Forebrain/Cerebrum	prenatal vs postnatal	human
2232.25	-1.62169	0.312896	-5.18282	2.18550214189355e-07	9.55266140242018e-07	NUP210	4.66520649519584e-07	prenatal	Glycolysis	Forebrain/Cerebrum	prenatal vs postnatal	human
1644.49	-0.563141	0.13704	-4.1093	3.96859498380237e-05	0.00012295	PRKAA1	7.33706099230182e-05	prenatal	Glycolysis	Forebrain/Cerebrum	prenatal vs postnatal	human
15684.6	0.417393	0.236478	1.76504	0.0775572	0.121353	LDHA	0.0967286	postnatal	Glycolysis	Forebrain/Cerebrum	prenatal vs postnatal	human
1124.16	-0.0883814	0.143349	-0.616548	0.537533	0.618999	NUP42	0.590754	prenatal	Glycolysis	Forebrain/Cerebrum	prenatal vs postnatal	human
38.5715	3.28801	0.559229	5.87954	4.11406815010829e-09	2.28479488195198e-08	ALDOB	1.06200363874888e-08	postnatal	Glycolysis	Forebrain/Cerebrum	prenatal vs postnatal	human
1623.96	-1.07091	0.179961	-5.95079	2.66848291591176e-09	1.52126942882691e-08	NUP54	7.05241913490964e-09	prenatal	Glycolysis	Forebrain/Cerebrum	prenatal vs postnatal	human
3374.87	-1.04147	0.158899	-6.55424	5.59250537224834e-11	4.00398731538738e-10	NUP58	1.77362313234162e-10	prenatal	Glycolysis	Forebrain/Cerebrum	prenatal vs postnatal	human
6672.32	-0.22851	0.149445	-1.52906	0.126251	0.185135	NCOR1	0.149083	prenatal	Glycolysis	Forebrain/Cerebrum	prenatal vs postnatal	human
4179.66	-0.369272	0.120888	-3.05466	0.00225313	0.00509554	FOXK2	0.0036246	prenatal	Glycolysis	Forebrain/Cerebrum	prenatal vs postnatal	human
6007.94	0.137286	0.146865	0.934778	0.349903	0.4374	PFKL	0.396318	postnatal	Glycolysis	Forebrain/Cerebrum	prenatal vs postnatal	human
54449.1	1.80276	0.209734	8.59545	8.29365666844564e-18	1.40423589733614e-16	APP	5.11442161220814e-17	postnatal	Glycolysis	Forebrain/Cerebrum	prenatal vs postnatal	human
1712.33	-0.621018	0.130099	-4.77344	1.81105133586643e-06	6.91255663655442e-06	ARNT	3.7929565713429e-06	prenatal	Glycolysis	Forebrain/Cerebrum	prenatal vs postnatal	human
5.63758	-0.260605	0.98502	-0.264569	0.791342	0.839009	PKLR	0.820925	prenatal	Glycolysis	Forebrain/Cerebrum	prenatal vs postnatal	human
11972.6	-0.474293	0.166878	-2.84216	0.00448089	0.00952261	OGT	0.00659113	prenatal	Glycolysis	Forebrain/Cerebrum	prenatal vs postnatal	human
31355.5	2.42468	0.230912	10.5005	8.59583833723575e-26	3.83003781585132e-24	ALDOA	1.19267256929146e-24	postnatal	Glycolysis	Forebrain/Cerebrum	prenatal vs postnatal	human
7615.36	0.539315	0.172993	3.11756	0.00182354	0.00419836	PFKM	0.00297666	postnatal	Glycolysis	Forebrain/Cerebrum	prenatal vs postnatal	human
5249.15	-0.107845	0.207684	-0.519273	0.60357	0.679108	RANBP2	0.656827	prenatal	Glycolysis	Forebrain/Cerebrum	prenatal vs postnatal	human
3237.7	-2.05013	0.269096	-7.6186	2.56438997527396e-14	2.81226532187476e-13	NUP205	1.23759690111048e-13	prenatal	Glycolysis	Forebrain/Cerebrum	prenatal vs postnatal	human
41.7854	0.883055	0.548837	1.60896	0.107626	0.161533	HKDC1	0.132739	postnatal	Glycolysis	Forebrain/Cerebrum	prenatal vs postnatal	human
9390.98	1.29665	0.184857	7.01434	2.31033920444241e-12	1.96981959445241e-11	HK1	8.84302247217612e-12	postnatal	Glycolysis	Forebrain/Cerebrum	prenatal vs postnatal	human
2886.36	-0.209307	0.111692	-1.87397	0.0609345	0.0983456	SEC13	0.077744	prenatal	Glycolysis	Forebrain/Cerebrum	prenatal vs postnatal	human
136.275	1.46542	0.190349	7.69858	1.37589726942851e-14	1.56042937379892e-13	PRXL2C	6.94202713211656e-14	postnatal	Glycolysis	Forebrain/Cerebrum	prenatal vs postnatal	human
33.0025	-1.29424	0.226814	-5.70618	1.15536674532381e-08	6.06268302322332e-08	PFKFB1	2.8499046384654e-08	prenatal	Glycolysis	Forebrain/Cerebrum	prenatal vs postnatal	human
1326.17	-0.36071	0.133584	-2.70025	0.00692874	0.0141106	ADPGK	0.00986014	prenatal	Glycolysis	Forebrain/Cerebrum	prenatal vs postnatal	human
1043.7	-2.85422	0.463645	-6.15605	7.45794445769729e-10	4.5868123517972e-09	HK2	2.069579587011e-09	prenatal	Glycolysis	Forebrain/Cerebrum	prenatal vs postnatal	human
129.981	0.857797	0.302053	2.83989	0.00451284	0.00958438	SLC2A6	0.00659113	postnatal	Glycolysis	Forebrain/Cerebrum	prenatal vs postnatal	human
13.4147	1.96693	0.431272	4.56076	5.09679371863631e-06	1.81930940620793e-05	HK3	1.02862564139751e-05	postnatal	Glycolysis	Forebrain/Cerebrum	prenatal vs postnatal	human
1541.47	-0.0754784	0.150397	-0.50186	0.615766	0.690205	JMJD8	0.663592	prenatal	Glycolysis	Forebrain/Cerebrum	prenatal vs postnatal	human
1288.94	-0.00774472	0.179839	-0.0430648	0.96565	0.974882	PRKAA2	0.96565	prenatal	Glycolysis	Forebrain/Cerebrum	prenatal vs postnatal	human
706.79	-1.36801	0.140611	-9.72899	2.26840532202536e-22	6.66558747722771e-21	NUP35	2.28902718858922e-21	prenatal	Glycolysis	Forebrain/Cerebrum	prenatal vs postnatal	human
124.282	0.682215	0.429738	1.58752	0.112396	0.16764	PGAM2	0.137098	postnatal	Glycolysis	Forebrain/Cerebrum	prenatal vs postnatal	human
2887.17	-0.27791	0.134812	-2.06147	0.0392586	0.0668752	FOXK1	0.0518774	prenatal	Glycolysis	Forebrain/Cerebrum	prenatal vs postnatal	human
20.8183	3.43101	0.292709	11.7216	9.88287458344543e-32	8.76379299856627e-30	FBP1	2.74249769690611e-30	postnatal	Glycolysis	Forebrain/Cerebrum	prenatal vs postnatal	human
9045.72	0.956599	0.343928	2.7814	0.00541257	0.0112867	PGM2L1	0.00780254	postnatal	Glycolysis	Forebrain/Cerebrum	prenatal vs postnatal	human
500.872	2.07771	0.531573	3.9086	9.2833635202706e-05	0.000271851	GPD1	0.000163564	postnatal	Glycolysis	Forebrain/Cerebrum	prenatal vs postnatal	human
3231.97	-1.33373	0.442769	-3.01224	0.00259328	0.00579031	DDIT4	0.0041122	prenatal	Glycolysis	Forebrain/Cerebrum	prenatal vs postnatal	human
4013.4	0.496083	0.169882	2.92016	0.00349855	0.00760811	PFKFB3	0.0053936	postnatal	Glycolysis	Forebrain/Cerebrum	prenatal vs postnatal	human
5.82622	6.23146	1.75117	3.55846	0.000373038	0.000978054	PGK2	0.000637033	postnatal	Glycolysis	Forebrain/Cerebrum	prenatal vs postnatal	human
2530.69	-0.516849	0.198638	-2.60196	0.0092692	0.0183822	INSR	0.0130238	prenatal	Glycolysis	Forebrain/Cerebrum	prenatal vs postnatal	human
2531.22	1.24848	0.176613	7.06904	1.56009501268071e-12	1.35884230133927e-11	PGAM1	6.41372394102071e-12	postnatal	Glycolysis	Forebrain/Cerebrum	prenatal vs postnatal	human
1181.97	-0.0126043	0.131575	-0.0957956	0.923683	0.943402	BPGM	0.93208	prenatal	Glycolysis	Forebrain/Cerebrum	prenatal vs postnatal	human
231.459	4.50219	0.499076	9.02105	1.86288023917168e-19	3.83140489108097e-18	NUPR1	1.29237316592535e-18	postnatal	Glycolysis	Forebrain/Cerebrum	prenatal vs postnatal	human
1891.01	2.92018	0.264089	11.0575	2.01543313900989e-28	1.21185520978212e-26	ZBTB7A	3.7285513071683e-27	postnatal	Glycolysis	Forebrain/Cerebrum	prenatal vs postnatal	human
1797.92	-1.35476	0.22749	-5.95523	2.59702949236645e-09	1.48336447534172e-08	DHTKD1	7.0309822842116e-09	prenatal	Glycolysis	Forebrain/Cerebrum	prenatal vs postnatal	human
173.958	-0.432141	0.503941	-0.857522	0.391156	0.479286	ZBTB20	0.434184	prenatal	Glycolysis	Forebrain/Cerebrum	prenatal vs postnatal	human
1968.95	0.449707	0.109929	4.09086	4.29767842622443e-05	0.000132377	PRKAG1	7.69423073082115e-05	postnatal	Glycolysis	Forebrain/Cerebrum	prenatal vs postnatal	human
512.641	0.740884	0.338819	2.18667	0.0287667	0.0507995	PPARA	0.0389403	postnatal	Glycolysis	Forebrain/Cerebrum	prenatal vs postnatal	human
560.931	-0.0661836	0.19429	-0.340642	0.733373	0.790938	ENTPD5	0.767966	prenatal	Glycolysis	Forebrain/Cerebrum	prenatal vs postnatal	human
59.6399	-0.695789	0.32145	-2.16453	0.0304236	0.053434	ENO4	0.040687	prenatal	Glycolysis	Forebrain/Cerebrum	prenatal vs postnatal	human
1694.73	-0.225913	0.150173	-1.50435	0.132491	0.193027	POM121	0.154805	prenatal	Glycolysis	Forebrain/Cerebrum	prenatal vs postnatal	human
1666.2	3.40948	0.313874	10.8626	1.73775508289584e-27	9.42487711384017e-26	OGDHL	2.75558306002055e-26	postnatal	Glycolysis	Forebrain/Cerebrum	prenatal vs postnatal	human
2798.61	-1.49674	0.132849	-11.2664	1.92183207824955e-29	1.29643408186026e-27	NUP62	4.266467213714e-28	prenatal	Glycolysis	Forebrain/Cerebrum	prenatal vs postnatal	human
1.18265	1.35933	0.866133	1.56942	0.116549	0.172928	PGAM4	0.140619	postnatal	Glycolysis	Forebrain/Cerebrum	prenatal vs postnatal	human
1407.93	0.181733	0.138671	1.31054	0.190015	0.262246	EIF6	0.21744	postnatal	Glycolysis	Forebrain/Cerebrum	prenatal vs postnatal	human
5.56151	0.203139	0.916893	0.221551	0.824663	0.866778	ACTN3	0.847571	postnatal	Glycolysis	Forebrain/Cerebrum	prenatal vs postnatal	human
1591.45	-0.341629	0.118479	-2.88344	0.00393352	0.00846024	POM121C	0.0059811	prenatal	Glycolysis	Forebrain/Cerebrum	prenatal vs postnatal	human
1181.98	-2.54294	0.324812	-7.82896	4.91907343724554e-15	5.9587187109301e-14	SEMA3F	4.90501894171055e-14	prenatal	Locomotion	Forebrain/Cerebrum	prenatal vs postnatal	human
4397.23	4.35987	0.28473	15.3123	6.33037435619546e-53	3.70935112275579e-50	CX3CL1	1.10465032515611e-50	postnatal	Locomotion	Forebrain/Cerebrum	prenatal vs postnatal	human
3669.85	-0.330714	0.175083	-1.8889	0.0589051	0.0955087	RALA	0.0821384	prenatal	Locomotion	Forebrain/Cerebrum	prenatal vs postnatal	human
1.77811	4.24021	1.14265	3.71085	0.000206562	0.000567572	CCL26	0.00042158	postnatal	Locomotion	Forebrain/Cerebrum	prenatal vs postnatal	human
482.148	1.4705	0.239775	6.13281	8.63401999065428e-10	5.25925506320245e-09	SEMA3G	4.24404644611034e-09	postnatal	Locomotion	Forebrain/Cerebrum	prenatal vs postnatal	human
811.779	0.331691	0.38027	0.872251	0.383072	0.47108	ANOS1	0.440716	postnatal	Locomotion	Forebrain/Cerebrum	prenatal vs postnatal	human
349.392	-1.57768	0.419368	-3.76203	0.000168537	0.000470882	PLAUR	0.000352212	prenatal	Locomotion	Forebrain/Cerebrum	prenatal vs postnatal	human
1150.55	1.97544	0.34545	5.71846	1.07494894805223e-08	5.66357093857422e-08	SEMA3B	4.36229282407244e-08	postnatal	Locomotion	Forebrain/Cerebrum	prenatal vs postnatal	human
41.8946	3.59247	0.440081	8.1632	3.26266749528335e-16	4.59046871134875e-15	ALOX5	4.06668198519246e-15	postnatal	Locomotion	Forebrain/Cerebrum	prenatal vs postnatal	human
122.331	-3.13618	0.667233	-4.70027	2.59815193183156e-06	9.71389620053224e-06	DPEP1	7.37199206674157e-06	prenatal	Locomotion	Forebrain/Cerebrum	prenatal vs postnatal	human
2367.71	0.557669	0.177517	3.14149	0.00168089	0.00389422	RALBP1	0.0028898	postnatal	Locomotion	Forebrain/Cerebrum	prenatal vs postnatal	human
15440.2	2.58254	0.363868	7.09747	1.27061026062067e-12	1.11449712440235e-11	ATP1A2	8.36684869729458e-12	postnatal	Locomotion	Forebrain/Cerebrum	prenatal vs postnatal	human
164.441	0.250476	0.420766	0.595285	0.551653	0.63202	HGF	0.604096	postnatal	Locomotion	Forebrain/Cerebrum	prenatal vs postnatal	human
31.731	1.27517	0.334809	3.80865	0.000139729	0.000396256	TYMP	0.000299174	postnatal	Locomotion	Forebrain/Cerebrum	prenatal vs postnatal	human
1128	0.864925	0.296762	2.91454	0.00356213	0.00773006	RTN4R	0.00586407	postnatal	Locomotion	Forebrain/Cerebrum	prenatal vs postnatal	human
31.3234	-1.49675	0.431717	-3.46697	0.000526356	0.00134407	ARHGEF5	0.000992964	prenatal	Locomotion	Forebrain/Cerebrum	prenatal vs postnatal	human
2215.74	0.142321	0.168088	0.846706	0.397159	0.485447	BCAR1	0.452969	postnatal	Locomotion	Forebrain/Cerebrum	prenatal vs postnatal	human
529.299	-0.902533	0.197784	-4.56323	5.03731761297455e-06	1.80022960471336e-05	HOMER3	1.33183624767282e-05	prenatal	Locomotion	Forebrain/Cerebrum	prenatal vs postnatal	human
1890.9	1.50229	0.22824	6.58205	4.63992728701959e-11	3.35169415144534e-10	PIK3CB	2.63148605922613e-10	postnatal	Locomotion	Forebrain/Cerebrum	prenatal vs postnatal	human
4019.25	0.320456	0.109553	2.92512	0.00344319	0.0074959	ELMO2	0.00569513	postnatal	Locomotion	Forebrain/Cerebrum	prenatal vs postnatal	human
1721.58	0.576068	0.266596	2.16083	0.0307086	0.0538522	SLC12A2	0.0442863	postnatal	Locomotion	Forebrain/Cerebrum	prenatal vs postnatal	human
933.942	-1.5549	0.45588	-3.41076	0.000647819	0.00162602	NTN1	0.00120903	prenatal	Locomotion	Forebrain/Cerebrum	prenatal vs postnatal	human
297.236	2.09373	0.390148	5.36649	8.02839351472404e-08	3.73875681338959e-07	PRKCQ	2.83021145115019e-07	postnatal	Locomotion	Forebrain/Cerebrum	prenatal vs postnatal	human
10068.2	0.00968897	0.122188	0.0792959	0.936797	0.952932	RHOA	0.942197	postnatal	Locomotion	Forebrain/Cerebrum	prenatal vs postnatal	human
30.9721	0.299743	0.612194	0.489622	0.624401	0.698208	FGF10	0.670511	postnatal	Locomotion	Forebrain/Cerebrum	prenatal vs postnatal	human
[truncated: 38,982 more rows]

## Sheet: Regulatory genes
baseMean	log2FoldChange	lfcSE	stat	pvalue	padj	gene	group	organism	tissue
7740.12	-0.530702	0.168778	-3.14437	0.00166445	0.00434977	CLK1	prenatal	human	Heart
530.442	0.303115	0.13269	2.28438	0.0223492	0.0437505	TFB1M	postnatal	human	Heart
621.446	0.675107	0.174793	3.86233	0.000112311	0.000375178	PTCD2	postnatal	human	Heart
4504.23	-0.356592	0.192914	-1.84845	0.0645378	0.108529	DAZAP1	prenatal	human	Heart
883.199	0.50983	0.150161	3.39522	0.000685727	0.00195254	NOA1	postnatal	human	Heart
1355.55	0.923867	0.194468	4.75073	2.02685422626919e-06	9.33058550428918e-06	MTIF2	postnatal	human	Heart
1120.97	-0.776107	0.185616	-4.18124	2.89918222447846e-05	0.000108543	SIRT1	prenatal	human	Heart
1942.32	1.23719	0.166103	7.44831	9.45426641846038e-14	1.18951942896775e-12	TIMM13	postnatal	human	Heart
2069.86	0.790706	0.173872	4.54763	5.42528943828894e-06	2.32360534047656e-05	POLRMT	postnatal	human	Heart
968.46	-0.219155	0.154366	-1.41971	0.155693	0.227505	TIMM9	prenatal	human	Heart
4043.29	-0.497385	0.0833816	-5.96517	2.44381057077733e-09	1.72580662657805e-08	YY1	prenatal	human	Heart
245.269	0.460936	0.186679	2.46913	0.013544	0.0282224	PSMA6	postnatal	human	Heart
2179.16	1.12135	0.138106	8.11951	4.68085854381945e-16	7.62752100483013e-15	TIMM50	postnatal	human	Heart
1941.06	0.674327	0.176113	3.82895	0.000128691	0.000424271	SSBP1	postnatal	human	Heart
153.535	0.605062	0.156322	3.87062	0.00010856	0.000363705	PTCD1	postnatal	human	Heart
771.784	-0.153967	0.120073	-1.28228	0.199746	0.279788	NRF1	prenatal	human	Heart
1032.94	-0.504388	0.111681	-4.51631	6.29264687535501e-06	2.66232013937792e-05	MTPAP	prenatal	human	Heart
1315.82	-0.630667	0.145897	-4.32269	1.54138154022831e-05	6.07615406087614e-05	TFAM	prenatal	human	Heart
1103.72	0.332973	0.131652	2.5292	0.0114323	0.0242754	DRG2	postnatal	human	Heart
5855.99	-1.10697	0.304033	-3.64096	0.000271621	0.00083744	PPARGC1A	prenatal	human	Heart
2026.87	-1.17252	0.147129	-7.96931	1.59563629015362e-15	2.47506117100838e-14	ATF2	prenatal	human	Heart
2486.61	0.646692	0.15298	4.22731	2.36503758411029e-05	9.00102877924376e-05	NFE2L2	postnatal	human	Heart
3835.06	0.512952	0.225951	2.27019	0.0231959	0.0451707	MEF2D	postnatal	human	Heart
1740.53	1.63431	0.176608	9.25387	2.16507382363936e-20	5.57543402276438e-19	SLIRP	postnatal	human	Heart
1690.93	-0.146666	0.224249	-0.654032	0.513091	0.602055	MTERF2	prenatal	human	Heart
2805.81	1.788	0.177642	10.0652	7.87255921543226e-24	2.9078990722142e-22	MTIF3	postnatal	human	Heart
3213.45	1.64447	0.172821	9.51548	1.80881580179653e-21	5.22816956394675e-20	MRPS7	postnatal	human	Heart
266.229	0.163441	0.152643	1.07074	0.284285	0.373961	TIMM8A	postnatal	human	Heart
345.421	-0.0606676	0.190671	-0.31818	0.750348	0.807342	MTERF1	prenatal	human	Heart
2645.18	0.805832	0.194822	4.13624	3.53038313252985e-05	0.000129969	LSM4	postnatal	human	Heart
5920.23	1.81969	0.289366	6.28856	3.20434228461897e-10	2.55718890770422e-09	JUND	postnatal	human	Heart
678.212	0.278994	0.212359	1.31378	0.18892	0.266999	NFATC1	postnatal	human	Heart
809.754	0.252171	0.140417	1.79588	0.0725143	0.119839	TIMM10B	postnatal	human	Heart
5042.48	0.0736423	0.148958	0.494385	0.621035	0.698083	PTCD3	postnatal	human	Heart
858.715	1.04775	0.130553	8.02547	1.0113930196596e-15	1.60457775590507e-14	EEFSEC	postnatal	human	Heart
4734.52	0.156665	0.133197	1.17619	0.239519	0.324966	GRSF1	postnatal	human	Heart
1774.61	0.57372	0.128843	4.45286	8.47341801977917e-06	3.50995587376241e-05	ERAL1	postnatal	human	Heart
792.076	1.82603	0.20436	8.93536	4.05854404510056e-19	9.01985834964492e-18	TIMM10	postnatal	human	Heart
799.425	0.84855	0.151073	5.61682	1.94499933149403e-08	1.21062361308596e-07	MTO1	postnatal	human	Heart
204.829	0.453234	0.210356	2.1546	0.0311932	0.0584959	RNASEL	postnatal	human	Heart
2214.12	1.07648	0.159678	6.74156	1.56696584030442e-11	1.4768904340175e-10	TBRG4	postnatal	human	Heart
6233.29	0.0707077	0.205416	0.344216	0.730684	0.791335	LRPPRC	postnatal	human	Heart
1681.13	0.964431	0.154371	6.24748	4.17138155129218e-10	3.27847036811365e-09	NHP2	postnatal	human	Heart
203.881	-0.754003	0.241	-3.12864	0.00175619	0.00456516	MTG1	prenatal	human	Heart
221	-2.45501	0.215339	-11.4007	4.14884847102816e-30	2.63128526410748e-28	CAMK4	prenatal	human	Heart
1071.99	0.438739	0.323907	1.35452	0.175569	0.251124	PPARGC1B	postnatal	human	Heart
849.164	1.1348	0.204659	5.54486	2.94195744806552e-08	1.78413090183419e-07	MTERF3	postnatal	human	Heart
409.922	0.943448	0.178942	5.27238	1.3466768784341e-07	7.43074554641075e-07	TFB2M	postnatal	human	Heart
1863.98	0.334424	0.18316	1.82585	0.0678723	0.113394	GFM2	postnatal	human	Heart
909.242	0.152552	0.286753	0.532	0.594726	0.674879	NOS3	postnatal	human	Heart
891.231	0.478517	0.17861	2.67912	0.0073816	0.016498	RPUSD4	postnatal	human	Heart
2175.84	0.550538	0.217468	2.53158	0.0113551	0.0241269	GFM1	postnatal	human	Heart
1669.71	1.01075	0.151166	6.68637	2.28772888490338e-11	2.11329255393083e-10	LSM3	postnatal	human	Heart
349.011	0.842844	0.216614	3.891	9.98307744648414e-05	0.00033715	RNASEH1	postnatal	human	Heart
932.052	2.82305	0.329912	8.55697	1.15867857591805e-17	2.2173351879381e-16	CEBPB	postnatal	human	Heart
1525.53	1.73319	0.18793	9.22251	2.90226504983728e-20	7.36623836593538e-19	MRPL57	postnatal	human	Heart
891.387	0.947277	0.173608	5.45641	4.85848178363539e-08	2.86110593925195e-07	SPRYD4	postnatal	human	Heart
13949.9	2.00919	0.413094	4.86377	1.15172386865063e-06	5.51305722248023e-06	JUN	postnatal	human	Heart
8985.43	1.50285	0.162049	9.27407	1.7917679766726e-20	4.65947764789187e-19	TUFM	postnatal	human	Heart
188.269	0.490642	0.179095	2.73956	0.00615223	0.0140133	TDRKH	postnatal	human	Heart
1531.48	-0.316354	0.148756	-2.12667	0.0334478	0.0621465	SECISBP2	prenatal	human	Heart
1349.68	0.64106	0.13204	4.85505	1.20358659185525e-06	5.74435226081376e-06	NELFE	postnatal	human	Heart
802.968	0.234108	0.130038	1.80031	0.0718118	0.118909	MCTS1	postnatal	human	Heart
318.863	1.49717	0.148643	10.0723	7.32777858015397e-24	2.72570689323955e-22	MRPS17	postnatal	human	Heart
7873.52	-0.840518	0.156681	-5.36453	8.11614544872449e-08	3.77498662396393e-07	CLK1	prenatal	human	Forebrain/Cerebrum
288.959	-0.00909862	0.219153	-0.0415173	0.966883	0.975765	TFB1M	prenatal	human	Forebrain/Cerebrum
846.66	-0.0559272	0.181068	-0.308875	0.757417	0.811423	PTCD2	prenatal	human	Forebrain/Cerebrum
3660.36	-0.940346	0.138311	-6.79879	1.05498444200061e-11	8.29661975388055e-11	DAZAP1	prenatal	human	Forebrain/Cerebrum
988.611	-0.674714	0.155294	-4.34475	1.39436142866546e-05	4.64745671807255e-05	NOA1	prenatal	human	Forebrain/Cerebrum
974.5	0.497313	0.195099	2.54903	0.0108024	0.0210938	MTIF2	postnatal	human	Forebrain/Cerebrum
1541.28	-1.46441	0.18685	-7.83733	4.60222770843878e-15	5.59077125361725e-14	SIRT1	prenatal	human	Forebrain/Cerebrum
1482.98	0.338532	0.175321	1.93093	0.0534915	0.0877307	TIMM13	postnatal	human	Forebrain/Cerebrum
1872.22	-0.0455612	0.168142	-0.270968	0.786415	0.834976	POLRMT	prenatal	human	Forebrain/Cerebrum
867.2	-0.188409	0.0986029	-1.91079	0.0560317	0.0913902	TIMM9	prenatal	human	Forebrain/Cerebrum
5522.44	-0.309976	0.0860417	-3.60263	0.000315016	0.000836349	YY1	prenatal	human	Forebrain/Cerebrum
223.311	0.20597	0.174886	1.17774	0.238901	0.318833	PSMA6	postnatal	human	Forebrain/Cerebrum
2481.36	0.190656	0.117079	1.62844	0.103432	0.156078	TIMM50	postnatal	human	Forebrain/Cerebrum
1593.12	0.0240332	0.184455	0.130293	0.896334	0.922618	SSBP1	postnatal	human	Forebrain/Cerebrum
209.307	-0.407091	0.141992	-2.867	0.0041438	0.00886994	PTCD1	prenatal	human	Forebrain/Cerebrum
1212.7	-0.532964	0.112412	-4.74115	2.12505311644886e-06	8.03760123173748e-06	NRF1	prenatal	human	Forebrain/Cerebrum
1109.8	-0.922035	0.115459	-7.98585	1.39562260872354e-15	1.81176307728472e-14	MTPAP	prenatal	human	Forebrain/Cerebrum
1851.85	-1.37484	0.172045	-7.99116	1.33675688412643e-15	1.73836565383961e-14	TFAM	prenatal	human	Forebrain/Cerebrum
1339.47	0.216141	0.130968	1.65033	0.0988746	0.149988	DRG2	postnatal	human	Forebrain/Cerebrum
666.497	1.90208	0.270412	7.034	2.00690639486188e-12	1.72737300414898e-11	PPARGC1A	postnatal	human	Forebrain/Cerebrum
4128.44	-0.4107	0.138293	-2.96979	0.00298008	0.00657778	ATF2	prenatal	human	Forebrain/Cerebrum
1498.13	0.705794	0.248739	2.83749	0.00454695	0.00965064	NFE2L2	postnatal	human	Forebrain/Cerebrum
3822.78	1.87832	0.254954	7.36729	1.74126396876666e-13	1.71452825181624e-12	MEF2D	postnatal	human	Forebrain/Cerebrum
1378.14	1.04145	0.183595	5.67252	1.40715309889783e-08	7.29804984509939e-08	SLIRP	postnatal	human	Forebrain/Cerebrum
1024.89	0.382252	0.159872	2.391	0.0168027	0.0312914	MTERF2	postnatal	human	Forebrain/Cerebrum
1354.78	0.90322	0.150727	5.99244	2.06714382630423e-09	1.19602180261908e-08	MTIF3	postnatal	human	Forebrain/Cerebrum
1840.22	0.537469	0.166127	3.2353	0.00121517	0.00289979	MRPS7	postnatal	human	Forebrain/Cerebrum
310.704	-0.248268	0.231046	-1.07454	0.28258	0.366457	TIMM8A	prenatal	human	Forebrain/Cerebrum
507.108	-0.588754	0.141577	-4.15855	3.20276850717833e-05	0.000100919	MTERF1	prenatal	human	Forebrain/Cerebrum
3263.94	0.0765574	0.207244	0.369408	0.711824	0.773665	LSM4	postnatal	human	Forebrain/Cerebrum
5682.19	0.225927	0.268569	0.841224	0.400222	0.488455	JUND	postnatal	human	Forebrain/Cerebrum
92.8796	0.722553	0.398528	1.81306	0.0698231	0.110765	NFATC1	postnatal	human	Forebrain/Cerebrum
1392.02	0.0531004	0.199647	0.265971	0.790261	0.838298	TIMM10B	postnatal	human	Forebrain/Cerebrum
3754.45	-0.471478	0.15127	-3.11679	0.00182833	0.00420841	PTCD3	prenatal	human	Forebrain/Cerebrum
807.423	-0.696199	0.16145	-4.31216	1.61669357439642e-05	5.33553514933877e-05	EEFSEC	prenatal	human	Forebrain/Cerebrum
4602.56	0.507626	0.143036	3.54893	0.000386799	0.00101254	GRSF1	postnatal	human	Forebrain/Cerebrum
2410.84	-0.00256966	0.121459	-0.0211566	0.983121	0.987649	ERAL1	prenatal	human	Forebrain/Cerebrum
1006.47	0.890419	0.160605	5.54417	2.95359164563245e-08	1.46595470417007e-07	TIMM10	postnatal	human	Forebrain/Cerebrum
849.95	0.321226	0.179605	1.78851	0.0736939	0.116117	MTO1	postnatal	human	Forebrain/Cerebrum
244.919	0.87818	0.186602	4.70618	2.5240522460503e-06	9.44749214941975e-06	RNASEL	postnatal	human	Forebrain/Cerebrum
1552.73	-0.3419	0.1507	-2.26874	0.0232842	0.0420235	TBRG4	prenatal	human	Forebrain/Cerebrum
6618.37	-0.070379	0.180007	-0.39098	0.695812	0.759938	LRPPRC	prenatal	human	Forebrain/Cerebrum
2681.87	0.310309	0.146102	2.12392	0.033677	0.0583455	NHP2	postnatal	human	Forebrain/Cerebrum
341.78	-1.58062	0.203796	-7.75591	8.77094814552473e-15	1.01869807376938e-13	MTG1	prenatal	human	Forebrain/Cerebrum
5049.71	0.837453	0.335148	2.49875	0.0124631	0.02397	CAMK4	postnatal	human	Forebrain/Cerebrum
301.061	2.39097	0.201129	11.8877	1.37073454148217e-32	1.34305019795584e-30	PPARGC1B	postnatal	human	Forebrain/Cerebrum
737.824	-0.466686	0.185795	-2.51183	0.0120108	0.0231987	MTERF3	prenatal	human	Forebrain/Cerebrum
371.854	-0.366625	0.166976	-2.19568	0.0281149	0.0497799	TFB2M	prenatal	human	Forebrain/Cerebrum
1812.06	0.217008	0.120847	1.79573	0.0725375	0.11447	GFM2	postnatal	human	Forebrain/Cerebrum
210.234	0.466333	0.273214	1.70684	0.0878514	0.135265	NOS3	postnatal	human	Forebrain/Cerebrum
1320.82	-0.5299	0.114906	-4.61158	3.99614274290068e-06	1.4485775076279e-05	RPUSD4	prenatal	human	Forebrain/Cerebrum
2063.52	0.393344	0.143784	2.73566	0.00622551	0.0128164	GFM1	postnatal	human	Forebrain/Cerebrum
1797.01	0.177302	0.106817	1.65986	0.0969418	0.147476	LSM3	postnatal	human	Forebrain/Cerebrum
413.129	-0.15839	0.266236	-0.594924	0.551894	0.632245	RNASEH1	prenatal	human	Forebrain/Cerebrum
287.412	3.82176	0.260565	14.6672	1.04532949673148e-48	4.05696450393812e-46	CEBPB	postnatal	human	Forebrain/Cerebrum
1260.59	0.407063	0.147115	2.76697	0.00565807	0.0117519	MRPL57	postnatal	human	Forebrain/Cerebrum
489.871	-0.193233	0.13284	-1.45463	0.145771	0.209575	SPRYD4	prenatal	human	Forebrain/Cerebrum
6683.56	-0.592324	0.2834	-2.09007	0.0366119	0.0628691	JUN	prenatal	human	Forebrain/Cerebrum
6030.98	0.049654	0.125452	0.3958	0.692253	0.756778	TUFM	postnatal	human	Forebrain/Cerebrum
1056.09	-0.101506	0.186951	-0.542957	0.587159	0.664162	TDRKH	prenatal	human	Forebrain/Cerebrum
3884.04	-0.993101	0.0828195	-11.9912	3.95356237687098e-33	4.04617322158947e-31	SECISBP2	prenatal	human	Forebrain/Cerebrum
1352.43	-0.176253	0.147796	-1.19254	0.233049	0.31204	NELFE	prenatal	human	Forebrain/Cerebrum
1340.62	0.20904	0.161771	1.2922	0.196289	0.269535	MCTS1	postnatal	human	Forebrain/Cerebrum
402.298	0.632409	0.180439	3.50484	0.000456876	0.00117975	MRPS17	postnatal	human	Forebrain/Cerebrum
11212.3	0.459218	0.137146	3.34838	0.000812863	0.00202825	CLK1	postnatal	human	Hindbrain/Cerebellum
335.531	-0.165208	0.179052	-0.922683	0.356173	0.443367	TFB1M	prenatal	human	Hindbrain/Cerebellum
976.434	-0.0453191	0.147507	-0.307232	0.758666	0.813557	PTCD2	prenatal	human	Hindbrain/Cerebellum
4330.89	0.0288069	0.175935	0.163736	0.869939	0.90228	DAZAP1	postnatal	human	Hindbrain/Cerebellum
1021.34	-0.244019	0.133091	-1.83348	0.0667316	0.106111	NOA1	prenatal	human	Hindbrain/Cerebellum
872.338	-0.331407	0.179395	-1.84736	0.0646955	0.103273	MTIF2	prenatal	human	Hindbrain/Cerebellum
2007.24	-0.272804	0.148787	-1.83352	0.0667256	0.106108	SIRT1	prenatal	human	Hindbrain/Cerebellum
1393.98	0.0314156	0.156855	0.200285	0.841258	0.880324	TIMM13	postnatal	human	Hindbrain/Cerebellum
1938.27	0.137126	0.162985	0.841345	0.400155	0.487409	POLRMT	postnatal	human	Hindbrain/Cerebellum
852.414	-0.174253	0.117083	-1.48828	0.136676	0.197289	TIMM9	prenatal	human	Hindbrain/Cerebellum
5812.98	-0.147311	0.102769	-1.43341	0.151741	0.215587	YY1	prenatal	human	Hindbrain/Cerebellum
258.4	0.271017	0.158753	1.70716	0.0877923	0.135102	PSMA6	postnatal	human	Hindbrain/Cerebellum
2386.59	-0.174374	0.118453	-1.47209	0.140997	0.202499	TIMM50	prenatal	human	Hindbrain/Cerebellum
1438.35	-0.314563	0.18037	-1.74398	0.0811619	0.126006	SSBP1	prenatal	human	Hindbrain/Cerebellum
264.183	-0.013365	0.118162	-0.113108	0.909945	0.932765	PTCD1	prenatal	human	Hindbrain/Cerebellum
1509.37	0.266996	0.108277	2.46586	0.0136684	0.026202	NRF1	postnatal	human	Hindbrain/Cerebellum
1215.61	-0.858439	0.0952599	-9.01154	2.0317669967105e-19	4.16101424686154e-18	MTPAP	prenatal	human	Hindbrain/Cerebellum
2154.01	-0.805335	0.114987	-7.00371	2.49277718399054e-12	2.21547240504573e-11	TFAM	prenatal	human	Hindbrain/Cerebellum
1441.41	0.354915	0.145308	2.44249	0.0145862	0.0277619	DRG2	postnatal	human	Hindbrain/Cerebellum
1094.39	0.15993	0.449931	0.355455	0.722249	0.783218	PPARGC1A	postnatal	human	Hindbrain/Cerebellum
5042.12	-0.408874	0.136192	-3.00219	0.00268042	0.00604975	ATF2	prenatal	human	Hindbrain/Cerebellum
2101.66	1.63516	0.198446	8.23981	1.72488987158258e-16	2.55399947288838e-15	NFE2L2	postnatal	human	Hindbrain/Cerebellum
4518.12	2.24844	0.173252	12.9778	1.63464545426613e-38	2.08731650313983e-36	MEF2D	postnatal	human	Hindbrain/Cerebellum
1073.21	0.429297	0.158474	2.70894	0.00674981	0.0138882	SLIRP	postnatal	human	Hindbrain/Cerebellum
2144.03	1.3469	0.132235	10.1857	2.29737162970972e-24	7.7390602362713e-23	MTERF2	postnatal	human	Hindbrain/Cerebellum
1432.06	0.846054	0.137194	6.16686	6.96591408960067e-10	4.41914040333903e-09	MTIF3	postnatal	human	Hindbrain/Cerebellum
1696.45	0.229181	0.141633	1.61813	0.105634	0.158125	MRPS7	postnatal	human	Hindbrain/Cerebellum
260.152	-1.14786	0.160318	-7.1599	8.07371293281324e-13	7.60058419762003e-12	TIMM8A	prenatal	human	Hindbrain/Cerebellum
515.797	-0.431498	0.120018	-3.59528	0.000324039	0.00087575	MTERF1	prenatal	human	Hindbrain/Cerebellum
2651.68	-0.227133	0.216551	-1.04887	0.294238	0.377932	LSM4	prenatal	human	Hindbrain/Cerebellum
5669.16	0.226296	0.230729	0.980785	0.326699	0.412917	JUND	postnatal	human	Hindbrain/Cerebellum
154.656	0.672787	0.328761	2.04643	0.0407142	0.0689258	NFATC1	postnatal	human	Hindbrain/Cerebellum
1385.56	-0.150226	0.194468	-0.772498	0.43982	0.52622	TIMM10B	prenatal	human	Hindbrain/Cerebellum
4423.09	-0.0669074	0.110919	-0.603209	0.54637	0.627953	PTCD3	prenatal	human	Hindbrain/Cerebellum
828.781	-0.274972	0.109783	-2.50469	0.012256	0.0237583	EEFSEC	prenatal	human	Hindbrain/Cerebellum
4526.67	-0.102457	0.100131	-1.02322	0.306203	0.390585	GRSF1	prenatal	human	Hindbrain/Cerebellum
2640.97	0.268583	0.0979177	2.74294	0.0060891	0.0126595	ERAL1	postnatal	human	Hindbrain/Cerebellum
775.356	0.241969	0.155397	1.5571	0.119446	0.17585	TIMM10	postnatal	human	Hindbrain/Cerebellum
1078.36	0.742715	0.151554	4.90065	9.55181348084095e-07	3.90756006034402e-06	MTO1	postnatal	human	Hindbrain/Cerebellum
222.163	-0.431626	0.194299	-2.22145	0.0263204	0.0468937	RNASEL	prenatal	human	Hindbrain/Cerebellum
1608.46	0.00976669	0.147886	0.0660422	0.947344	0.961413	TBRG4	postnatal	human	Hindbrain/Cerebellum
8357.34	-0.0752643	0.142984	-0.526383	0.598622	0.675382	LRPPRC	prenatal	human	Hindbrain/Cerebellum
1976.51	-0.209291	0.126516	-1.65427	0.0980727	0.14833	NHP2	prenatal	human	Hindbrain/Cerebellum
505.189	0.0865093	0.222791	0.388298	0.697796	0.762011	MTG1	postnatal	human	Hindbrain/Cerebellum
15255.5	2.65243	0.330123	8.03468	9.38259429310082e-16	1.2760669889752e-14	CAMK4	postnatal	human	Hindbrain/Cerebellum
891.537	3.02416	0.398814	7.58288	3.37976936362808e-14	3.80654008990604e-13	PPARGC1B	postnatal	human	Hindbrain/Cerebellum
781.641	0.0745153	0.172161	0.432823	0.665143	0.733998	MTERF3	postnatal	human	Hindbrain/Cerebellum
383.335	0.0144873	0.163106	0.0888212	0.929224	0.947812	TFB2M	postnatal	human	Hindbrain/Cerebellum
1694.95	-0.296115	0.0953178	-3.1066	0.00189251	0.00440201	GFM2	prenatal	human	Hindbrain/Cerebellum
160.372	0.295446	0.301274	0.980653	0.326764	0.412981	NOS3	postnatal	human	Hindbrain/Cerebellum
1330.87	-0.40783	0.11513	-3.54234	0.000396593	0.00105626	RPUSD4	prenatal	human	Hindbrain/Cerebellum
3494.15	0.862866	0.155586	5.54591	2.92436478396981e-08	1.47826120360375e-07	GFM1	postnatal	human	Hindbrain/Cerebellum
1643.26	0.320556	0.124402	2.57677	0.0099727	0.0197236	LSM3	postnatal	human	Hindbrain/Cerebellum
484.211	-0.212522	0.201382	-1.05532	0.291279	0.374792	RNASEH1	prenatal	human	Hindbrain/Cerebellum
128.157	2.32819	0.39266	5.92929	3.04254244665785e-09	1.76526540400265e-08	CEBPB	postnatal	human	Hindbrain/Cerebellum
1189.19	0.29832	0.113599	2.62607	0.00863773	0.0173381	MRPL57	postnatal	human	Hindbrain/Cerebellum
598.755	0.220866	0.108039	2.04432	0.0409216	0.0692024	SPRYD4	postnatal	human	Hindbrain/Cerebellum
6266.53	-0.256922	0.292382	-0.878719	0.379553	0.467037	JUN	prenatal	human	Hindbrain/Cerebellum
5971.05	0.00361371	0.138179	0.0261524	0.979136	0.984682	TUFM	postnatal	human	Hindbrain/Cerebellum
1645.71	0.841475	0.164851	5.10445	3.31754271922742e-07	1.45519930197468e-06	TDRKH	postnatal	human	Hindbrain/Cerebellum
4516.25	-0.239512	0.160926	-1.48833	0.136663	0.197279	SECISBP2	prenatal	human	Hindbrain/Cerebellum
1120.08	-0.145618	0.154975	-0.939622	0.347411	0.434123	NELFE	prenatal	human	Hindbrain/Cerebellum
1261.44	-0.321119	0.136301	-2.35596	0.0184749	0.0342472	MCTS1	prenatal	human	Hindbrain/Cerebellum
350.359	0.022803	0.112675	0.202379	0.83962	0.879134	MRPS17	postnatal	human	Hindbrain/Cerebellum
8586.41	-0.112565	0.206656	-0.544696	0.585963	0.680492	CLK1	prenatal	human	Kidney
382.605	-0.122683	0.149304	-0.821702	0.411247	0.519968	TFB1M	prenatal	human	Kidney
740.142	-0.309875	0.144572	-2.14339	0.0320818	0.0649194	PTCD2	prenatal	human	Kidney
3638.11	-0.13088	0.23051	-0.567783	0.570182	0.666857	DAZAP1	prenatal	human	Kidney
958.917	0.003303	0.13238	0.0249509	0.980094	0.986248	NOA1	postnatal	human	Kidney
1300.39	0.476534	0.155601	3.06255	0.0021946	0.00625044	MTIF2	postnatal	human	Kidney
1738.85	-0.888553	0.183152	-4.85144	1.22567152078036e-06	7.33614162663993e-06	SIRT1	prenatal	human	Kidney
1502.32	1.33163	0.34072	3.90828	9.29544432683676e-05	0.000372829	TIMM13	postnatal	human	Kidney
1682.28	1.20368	0.34958	3.44321	0.000574855	0.00190218	POLRMT	postnatal	human	Kidney
793.417	-0.0298631	0.130601	-0.228659	0.819134	0.871462	TIMM9	prenatal	human	Kidney
5174.52	-0.232965	0.110644	-2.10555	0.0352437	0.0704462	YY1	prenatal	human	Kidney
227.214	-0.511078	0.187482	-2.72601	0.00641043	0.01602	PSMA6	prenatal	human	Kidney
1806.99	0.184502	0.12133	1.52066	0.128346	0.206469	TIMM50	postnatal	human	Kidney
1299.72	0.0413186	0.168512	0.245196	0.806305	0.861796	SSBP1	postnatal	human	Kidney
172.317	0.374551	0.24641	1.52003	0.128503	0.206654	PTCD1	postnatal	human	Kidney
981.54	-0.257131	0.118285	-2.17383	0.0297178	0.0608712	NRF1	prenatal	human	Kidney
1119.87	-0.672203	0.145143	-4.63133	3.63332731491468e-06	1.96981675820146e-05	MTPAP	prenatal	human	Kidney
2027.21	-0.497587	0.197408	-2.5206	0.0117154	0.0272608	TFAM	prenatal	human	Kidney
1434.32	0.367632	0.131206	2.80194	0.00507959	0.0130861	DRG2	postnatal	human	Kidney
2063.73	1.87187	0.419858	4.45833	8.26003437859376e-06	4.15987445642116e-05	PPARGC1A	postnatal	human	Kidney
3015.41	-0.817177	0.156754	-5.21313	1.85676493760983e-07	1.31518215077258e-06	ATF2	prenatal	human	Kidney
4496.22	0.859519	0.239547	3.58809	0.000333104	0.00116401	NFE2L2	postnatal	human	Kidney
1893.35	0.315652	0.180858	1.7453	0.080933	0.141468	MEF2D	postnatal	human	Kidney
941.988	0.765433	0.16313	4.69217	2.70325356615133e-06	1.50183201577205e-05	SLIRP	postnatal	human	Kidney
1139.95	0.450114	0.131932	3.41172	0.000645549	0.00210619	MTERF2	postnatal	human	Kidney
1262.64	1.00957	0.177319	5.69353	1.24441441040134e-08	1.12484266549502e-07	MTIF3	postnatal	human	Kidney
1721.07	0.928014	0.15201	6.10495	1.02835413323731e-09	1.15083182189613e-08	MRPS7	postnatal	human	Kidney
298.271	-0.591214	0.158725	-3.72478	0.000195489	0.000721109	TIMM8A	prenatal	human	Kidney
450.738	-0.198852	0.196042	-1.01433	0.310423	0.417419	MTERF1	prenatal	human	Kidney
2326.59	0.613336	0.222629	2.75497	0.00586972	0.0148394	LSM4	postnatal	human	Kidney
3821.38	1.09104	0.360202	3.02896	0.00245399	0.00689946	JUND	postnatal	human	Kidney
322.842	1.33081	0.226643	5.87185	4.30963611996305e-09	4.25830655504595e-08	NFATC1	postnatal	human	Kidney
1415.93	0.368422	0.107683	3.42135	0.00062311	0.00204213	TIMM10B	postnatal	human	Kidney
3564.09	-0.292944	0.136789	-2.14157	0.0322285	0.065189	PTCD3	prenatal	human	Kidney
766.544	0.758347	0.259848	2.91842	0.00351808	0.00947933	EEFSEC	postnatal	human	Kidney
3971.65	-0.350819	0.131379	-2.67029	0.00757852	0.0185679	GRSF1	prenatal	human	Kidney
2068.5	0.156434	0.148061	1.05655	0.290718	0.396692	ERAL1	postnatal	human	Kidney
592.265	0.933703	0.210501	4.43561	9.18106405666681e-06	4.57309962822581e-05	TIMM10	postnatal	human	Kidney
991.792	0.585412	0.105903	5.52781	3.24260424526238e-08	2.69929654138923e-07	MTO1	postnatal	human	Kidney
485.822	0.679552	0.276624	2.45659	0.0140262	0.031886	RNASEL	postnatal	human	Kidney
1550.66	0.549541	0.213736	2.57112	0.010137	0.0240074	TBRG4	postnatal	human	Kidney
6948.48	-0.13913	0.151341	-0.919313	0.357932	0.46713	LRPPRC	prenatal	human	Kidney
1482.15	0.552374	0.198893	2.77725	0.00548218	0.01397	NHP2	postnatal	human	Kidney
435.798	-0.0513323	0.26269	-0.19541	0.845072	0.890646	MTG1	prenatal	human	Kidney
803.173	-2.38249	0.442162	-5.38826	7.11413605323661e-08	5.51681831515837e-07	CAMK4	prenatal	human	Kidney
118.977	-0.238762	0.230416	-1.03622	0.3001	0.406845	PPARGC1B	prenatal	human	Kidney
680.985	-0.136918	0.195989	-0.698597	0.484804	0.590373	MTERF3	prenatal	human	Kidney
485.053	0.285947	0.152535	1.87463	0.0608439	0.111429	TFB2M	postnatal	human	Kidney
1740.2	-0.012204	0.147542	-0.0827152	0.934078	0.955908	GFM2	prenatal	human	Kidney
525.854	1.31374	0.353545	3.71591	0.000202476	0.000745089	NOS3	postnatal	human	Kidney
1124.04	-0.427541	0.156181	-2.73748	0.00619122	0.0155389	RPUSD4	prenatal	human	Kidney
1863.43	0.472263	0.126513	3.73291	0.000189277	0.000701038	GFM1	postnatal	human	Kidney
1409.04	0.642802	0.192899	3.33232	0.000861256	0.00272478	LSM3	postnatal	human	Kidney
365.081	-0.500468	0.166121	-3.01266	0.00258965	0.00723879	RNASEH1	prenatal	human	Kidney
216.894	1.34594	0.372013	3.61799	0.000296905	0.00105037	CEBPB	postnatal	human	Kidney
1166.2	0.975401	0.150226	6.49289	8.42073889739775e-11	1.14849412624508e-09	MRPL57	postnatal	human	Kidney
918.493	0.729617	0.118434	6.16056	7.24884129999553e-10	8.36619143141378e-09	SPRYD4	postnatal	human	Kidney
5636.74	0.49122	0.400569	1.22631	0.220083	0.31841	JUN	postnatal	human	Kidney
6090.19	1.09424	0.199452	5.48622	4.10636843152076e-08	3.34003749601824e-07	TUFM	postnatal	human	Kidney
311.921	-0.20568	0.148676	-1.38341	0.16654	0.254888	TDRKH	prenatal	human	Kidney
3238.6	-0.157214	0.0745056	-2.1101	0.0348501	0.0697877	SECISBP2	prenatal	human	Kidney
1245.01	0.365231	0.167101	2.18568	0.0288388	0.059372	NELFE	postnatal	human	Kidney
853.798	-0.278986	0.137505	-2.02891	0.0424671	0.0823686	MCTS1	prenatal	human	Kidney
247.191	0.619721	0.188327	3.29067	0.00099948	0.00311657	MRPS17	postnatal	human	Kidney
6547.72	0.256519	0.208027	1.23311	0.217536	0.31802	CLK1	postnatal	human	Liver
541.538	0.758312	0.171513	4.42131	9.81022543046206e-06	4.13271011131809e-05	TFB1M	postnatal	human	Liver
483.939	0.256744	0.156279	1.64285	0.100414	0.168644	PTCD2	postnatal	human	Liver
4047	-0.987877	0.165836	-5.95696	2.56977499755132e-09	1.84939224950358e-08	DAZAP1	prenatal	human	Liver
559.259	-0.641161	0.128811	-4.97753	6.44006148431274e-07	3.28969681607472e-06	NOA1	prenatal	human	Liver
1269.61	0.394574	0.107247	3.67913	0.000234029	0.000771152	MTIF2	postnatal	human	Liver
750.644	-0.272683	0.140636	-1.93892	0.0525112	0.0972024	SIRT1	prenatal	human	Liver
1988.86	-0.197487	0.177138	-1.11488	0.264903	0.372516	TIMM13	prenatal	human	Liver
1937.93	-0.378375	0.156036	-2.42492	0.0153118	0.0333999	POLRMT	prenatal	human	Liver
819.349	-0.564891	0.178429	-3.16591	0.00154598	0.00427631	TIMM9	prenatal	human	Liver
3769.76	-0.183864	0.0887107	-2.07263	0.0382069	0.0740612	YY1	prenatal	human	Liver
193.063	0.8819	0.181828	4.85018	1.2334744336672e-06	6.01646838123842e-06	PSMA6	postnatal	human	Liver
1619.69	-0.480408	0.149381	-3.216	0.00129992	0.00365725	TIMM50	prenatal	human	Liver
1794.56	-0.507648	0.204697	-2.48	0.0131384	0.0292127	SSBP1	prenatal	human	Liver
186.396	-0.297306	0.188837	-1.57441	0.115393	0.189	PTCD1	prenatal	human	Liver
608.179	-0.709219	0.151322	-4.68683	2.77465560962818e-06	1.27857245931107e-05	NRF1	prenatal	human	Liver
945.285	-0.451688	0.146366	-3.08603	0.00202852	0.00546584	MTPAP	prenatal	human	Liver
1355.55	-0.185241	0.134467	-1.3776	0.168327	0.25801	TFAM	prenatal	human	Liver
1012.4	-0.566584	0.13337	-4.24822	2.15476528330252e-05	8.55018323680079e-05	DRG2	prenatal	human	Liver
1175.42	1.39727	0.40168	3.47857	0.000504095	0.00154667	PPARGC1A	postnatal	human	Liver
1537.34	0.0798781	0.134871	0.592256	0.553679	0.658251	ATF2	postnatal	human	Liver
2852.63	0.547605	0.131767	4.15585	3.24077694262184e-05	0.000124646	NFE2L2	postnatal	human	Liver
959.946	-0.0666487	0.126646	-0.52626	0.598708	0.698722	MEF2D	prenatal	human	Liver
1636.78	-0.000320634	0.202182	-0.00158586	0.998735	0.999262	SLIRP	prenatal	human	Liver
1258.99	0.74138	0.239898	3.0904	0.0019989	0.00539593	MTERF2	postnatal	human	Liver
1412.73	0.363251	0.141629	2.5648	0.0103234	0.0236112	MTIF3	postnatal	human	Liver
1889.77	-0.32403	0.123957	-2.61404	0.0089478	0.0207844	MRPS7	prenatal	human	Liver
438.587	-0.329261	0.153448	-2.14575	0.031893	0.0633602	TIMM8A	prenatal	human	Liver
366.987	0.171966	0.101811	1.68907	0.0912052	0.155561	MTERF1	postnatal	human	Liver
3023.91	-0.694181	0.160408	-4.32759	1.50752445672738e-05	6.15193765882706e-05	LSM4	prenatal	human	Liver
5200.04	-0.229232	0.275857	-0.830981	0.405984	0.520799	JUND	prenatal	human	Liver
160.763	-0.60968	0.267999	-2.27493	0.0229099	0.0476171	NFATC1	prenatal	human	Liver
1120.52	-0.216661	0.171455	-1.26367	0.20635	0.304739	TIMM10B	prenatal	human	Liver
3273.02	-0.190851	0.104109	-1.83318	0.0667753	0.119596	PTCD3	prenatal	human	Liver
879.226	-0.785706	0.158292	-4.96363	6.91861509624751e-07	3.51960399679721e-06	EEFSEC	prenatal	human	Liver
2402.21	-0.100397	0.0882765	-1.1373	0.255411	0.36151	GRSF1	prenatal	human	Liver
1401.05	-0.203168	0.140172	-1.44942	0.147221	0.230989	ERAL1	prenatal	human	Liver
972.305	0.0626886	0.219444	0.28567	0.775131	0.841596	TIMM10	postnatal	human	Liver
1301.91	0.904353	0.141124	6.40823	1.47218055817516e-10	1.23596210062744e-09	MTO1	postnatal	human	Liver
204.224	0.12285	0.149665	0.820831	0.411743	0.526332	RNASEL	postnatal	human	Liver
1785.43	-0.650297	0.126364	-5.14624	2.65762914467442e-07	1.44203900927008e-06	TBRG4	prenatal	human	Liver
4723.5	-0.38029	0.154464	-2.46199	0.0138168	0.0304947	LRPPRC	prenatal	human	Liver
1547.03	-0.519363	0.150476	-3.45146	0.000557557	0.00169081	NHP2	prenatal	human	Liver
364.125	0.0597388	0.206922	0.288702	0.772809	0.83946	MTG1	postnatal	human	Liver
270.361	1.66606	0.356804	4.66939	3.02092753895305e-06	1.38464861576618e-05	CAMK4	postnatal	human	Liver
183.406	1.13571	0.203399	5.58368	2.35478906858955e-08	1.48359017847507e-07	PPARGC1B	postnatal	human	Liver
756.259	0.122444	0.166204	0.736707	0.4613	0.573815	MTERF3	postnatal	human	Liver
599.318	0.489813	0.173147	2.82889	0.0046709	0.0115793	TFB2M	postnatal	human	Liver
1331.36	0.140796	0.140596	1.00142	0.316622	0.429195	GFM2	postnatal	human	Liver
437.477	-0.742434	0.289608	-2.56358	0.0103598	0.0236905	NOS3	prenatal	human	Liver
1259.49	-0.44852	0.0986377	-4.54715	5.43775649639109e-06	2.38253859313979e-05	RPUSD4	prenatal	human	Liver
2098.52	0.329454	0.140675	2.34196	0.0191827	0.0407188	GFM1	postnatal	human	Liver
1543.73	-0.0627375	0.174131	-0.360289	0.718631	0.796527	LSM3	prenatal	human	Liver
264.282	-0.270845	0.183901	-1.47277	0.140813	0.222903	RNASEH1	prenatal	human	Liver
1942.66	2.52315	0.236868	10.6521	1.70390174253314e-26	7.99287373514679e-25	CEBPB	postnatal	human	Liver
1622.57	-0.0946584	0.12592	-0.751733	0.452211	0.564764	MRPL57	prenatal	human	Liver
2099.48	1.3435	0.182843	7.34783	2.01446928136022e-13	2.41218695287393e-12	SPRYD4	postnatal	human	Liver
4399.03	0.771993	0.341713	2.25918	0.023872	0.0493318	JUN	postnatal	human	Liver
7372.14	-0.175083	0.141186	-1.24008	0.214945	0.314815	TUFM	prenatal	human	Liver
301.859	-0.87537	0.243589	-3.59363	0.000326097	0.00104427	TDRKH	prenatal	human	Liver
2030.69	-0.255746	0.12289	-2.08109	0.0374258	0.0727605	SECISBP2	prenatal	human	Liver
926.388	-0.989918	0.15079	-6.56486	5.20809453565742e-11	4.61791963085258e-10	NELFE	prenatal	human	Liver
877.519	0.0352833	0.130058	0.271289	0.786169	0.84994	MCTS1	postnatal	human	Liver
253.262	0.24037	0.171479	1.40175	0.160991	0.248682	MRPS17	postnatal	human	Liver
4604.04	1.14226	0.216197	5.28343	1.26789903846146e-07	1.93654279733034e-06	GRSF1	postnatal	rhesus	Heart
1958.27	-0.261202	0.145509	-1.79509	0.07264	0.153003	NELFE	prenatal	rhesus	Heart
4396.83	0.5834	0.426426	1.36812	0.171275	0.298623	PPARGC1A	postnatal	rhesus	Heart
4641.91	0.588593	0.15073	3.90495	9.42458069671037e-05	0.000621972	NFE2L2	postnatal	rhesus	Heart
1272.53	0.0201928	0.140493	0.143728	0.885715	0.933145	ERAL1	postnatal	rhesus	Heart
1103.35	0.284106	0.16649	1.70644	0.0879256	0.177865	MTPAP	postnatal	rhesus	Heart
15231.6	-0.161538	0.137229	-1.17714	0.239139	0.383406	DAZAP1	prenatal	rhesus	Heart
10073.6	0.954362	0.217877	4.38029	1.18523327514359e-05	0.000101912	TUFM	postnatal	rhesus	Heart
1976.45	-0.0793142	0.135698	-0.584489	0.558892	0.696241	ATF2	prenatal	rhesus	Heart
1851.43	0.100029	0.216162	0.462751	0.643543	0.764018	LSM4	postnatal	rhesus	Heart
560.967	1.33646	0.373574	3.57749	0.000346907	0.00189275	PPARGC1B	postnatal	rhesus	Heart
3810.58	0.857811	0.207594	4.13215	3.59383362418151e-05	0.000268571	GFM1	postnatal	rhesus	Heart
680.937	0.208044	0.233592	0.890631	0.373127	0.526367	RNASEL	postnatal	rhesus	Heart
7820.88	0.332294	0.21424	1.55104	0.120893	0.228635	CLK1	postnatal	rhesus	Heart
1268.82	0.805077	0.159486	5.04794	4.46607537063215e-07	5.80035187515238e-06	TIMM10B	postnatal	rhesus	Heart
359.667	0.142029	0.166717	0.851916	0.394261	0.54713	RPUSD4	postnatal	rhesus	Heart
919.994	0.585103	0.248897	2.35078	0.018734	0.0520139	MTERF3	postnatal	rhesus	Heart
2447.26	0.235954	0.116753	2.02097	0.0432832	0.101676	MTIF3	postnatal	rhesus	Heart
733.511	0.740607	0.192295	3.85141	0.00011744	0.000748686	MCTS1	postnatal	rhesus	Heart
118.38	0.5779	0.308552	1.87294	0.0610764	0.133412	TDRKH	postnatal	rhesus	Heart
2878.75	0.889487	0.217118	4.09679	4.18915878164254e-05	0.00030649	TBRG4	postnatal	rhesus	Heart
893.253	0.211015	0.176825	1.19336	0.23273	0.375845	TFB1M	postnatal	rhesus	Heart
37.4825	-0.873837	0.558929	-1.56341	0.117956	0.224468	CAMK4	prenatal	rhesus	Heart
818.147	-0.333921	0.107155	-3.11623	0.00183177	0.00763562	SECISBP2	prenatal	rhesus	Heart
1335.25	0.33896	0.168304	2.01397	0.0440124	0.102963	RNASEH1	postnatal	rhesus	Heart
371.215	0.357172	0.224728	1.58935	0.111981	0.215576	MTERF1	postnatal	rhesus	Heart
6569.75	1.12687	0.19631	5.74027	9.45254358674136e-09	1.93441291052665e-07	PTCD3	postnatal	rhesus	Heart
1483.52	0.843013	0.198099	4.25551	2.0857288958667e-05	0.00016766	PSMA6	postnatal	rhesus	Heart
5146.3	0.555572	0.173575	3.20075	0.00137069	0.00599023	MEF2D	postnatal	rhesus	Heart
2141.32	1.21368	0.165907	7.31544	2.56533401516583e-13	1.50370950487788e-11	PTCD2	postnatal	rhesus	Heart
614.061	-0.0496373	0.185277	-0.267908	0.78877	0.86924	EEFSEC	prenatal	rhesus	Heart
1724.36	0.216093	0.187875	1.15019	0.250064	0.395907	NHP2	postnatal	rhesus	Heart
1250.31	1.00961	0.148837	6.78329	1.1746573030157e-11	5.01970220822044e-10	MTO1	postnatal	rhesus	Heart
1946.34	0.553378	0.16794	3.2951	0.000983857	0.00454551	TIMM50	postnatal	rhesus	Heart
1336.42	0.245813	0.172241	1.42715	0.153537	0.274242	TFAM	postnatal	rhesus	Heart
11983.1	0.805177	0.222165	3.62422	0.000289832	0.00162645	LRPPRC	postnatal	rhesus	Heart
1551.84	0.673695	0.159037	4.23608	2.27452055995434e-05	0.000180499	GFM2	postnatal	rhesus	Heart
1439.14	-0.417889	0.460194	-0.90807	0.363841	0.517193	NOS3	prenatal	rhesus	Heart
1575.23	-0.0968679	0.145715	-0.664776	0.506194	0.651969	DRG2	prenatal	rhesus	Heart
994.261	0.10972	0.213362	0.514243	0.607082	0.734986	MTERF2	postnatal	rhesus	Heart
1878.82	0.567515	0.173893	3.26359	0.00110011	0.00498864	SSBP1	postnatal	rhesus	Heart
831.353	0.29536	0.129864	2.27437	0.0229436	0.061262	NOA1	postnatal	rhesus	Heart
1133.7	-0.0984468	0.256254	-0.384177	0.700847	0.807099	NFATC1	prenatal	rhesus	Heart
2700.91	-0.00931551	0.124813	-0.0746359	0.940504	0.968229	YY1	prenatal	rhesus	Heart
2813.95	1.08294	0.231731	4.67328	2.96431576427347e-06	3.0488570679026e-05	SLIRP	postnatal	rhesus	Heart
11532.3	1.09768	0.203283	5.39977	6.67272682656038e-08	1.10494795642151e-06	PTCD1	postnatal	rhesus	Heart
1465.52	-0.0920425	0.149928	-0.613911	0.539274	0.679255	SIRT1	prenatal	rhesus	Heart
3548.39	0.598435	0.175874	3.40263	0.000667409	0.00327864	MTIF2	postnatal	rhesus	Heart
2216.52	0.510887	0.247634	2.06307	0.0391058	0.0936004	JUND	postnatal	rhesus	Heart
1.49621	0.271754	1.02556	0.264979	0.791025	0.870491	LSM3	postnatal	rhesus	Heart
903.178	0.126778	0.13695	0.925721	0.354591	0.508082	NRF1	postnatal	rhesus	Heart
333.447	1.48349	0.22066	6.72297	1.78055734237868e-11	7.34055081958647e-10	CEBPB	postnatal	rhesus	Heart
1712.74	0.275297	0.235047	1.17124	0.241501	0.38599	POLRMT	postnatal	rhesus	Heart
276.542	0.504591	0.216617	2.32941	0.0198374	0.0545363	TIMM10	postnatal	rhesus	Heart
339.913	0.931248	0.294897	3.15788	0.00158923	0.00676224	TIMM8A	postnatal	rhesus	Heart
740.184	0.619694	0.211938	2.92394	0.00345627	0.0130396	SPRYD4	postnatal	rhesus	Heart
941.917	1.21902	0.193971	6.28453	3.28839197716862e-10	9.65194046947085e-09	TFB2M	postnatal	rhesus	Heart
901.913	0.268162	0.201394	1.33153	0.183016	0.313943	MRPL57	postnatal	rhesus	Heart
1155.18	0.572078	0.190276	3.00656	0.00264218	0.0103617	MRPS17	postnatal	rhesus	Heart
5767.14	0.841423	0.277877	3.02804	0.00246142	0.00976264	JUN	postnatal	rhesus	Heart
2166.12	0.823062	0.192061	4.28541	1.82401845764862e-05	0.000148545	MRPS7	postnatal	rhesus	Heart
3603.54	0.246946	0.20574	1.20028	0.230031	0.382447	GRSF1	postnatal	rhesus	Forebrain/Cerebrum
2099.27	0.454917	0.314988	1.44423	0.148673	0.280006	NELFE	postnatal	rhesus	Forebrain/Cerebrum
689.753	0.0879142	0.582313	0.150974	0.879996	0.928899	PPARGC1A	postnatal	rhesus	Forebrain/Cerebrum
1977.12	1.15464	0.332439	3.47323	0.000514239	0.00311449	NFE2L2	postnatal	rhesus	Forebrain/Cerebrum
2564.2	0.274994	0.275817	0.997017	0.318756	0.480896	ERAL1	postnatal	rhesus	Forebrain/Cerebrum
2454.92	-0.193069	0.133348	-1.44786	0.147655	0.278556	MTPAP	prenatal	rhesus	Forebrain/Cerebrum
17549.6	0.19274	0.199948	0.96395	0.335071	0.498291	DAZAP1	postnatal	rhesus	Forebrain/Cerebrum
7005.05	0.463797	0.304585	1.52272	0.127828	0.250455	TUFM	postnatal	rhesus	Forebrain/Cerebrum
5160.53	-0.485359	0.310234	-1.56449	0.117702	0.235658	ATF2	prenatal	rhesus	Forebrain/Cerebrum
2774.27	-0.14771	0.328227	-0.450024	0.652693	0.770104	LSM4	prenatal	rhesus	Forebrain/Cerebrum
230.459	1.74349	0.59008	2.95466	0.00313013	0.0138269	PPARGC1B	postnatal	rhesus	Forebrain/Cerebrum
3518.66	0.0129239	0.172586	0.0748839	0.940307	0.96538	GFM1	postnatal	rhesus	Forebrain/Cerebrum
175.483	-0.175577	0.246806	-0.711396	0.476839	0.629929	RNASEL	prenatal	rhesus	Forebrain/Cerebrum
6645.22	-0.263233	0.22847	-1.15215	0.249258	0.404821	CLK1	prenatal	rhesus	Forebrain/Cerebrum
1818.83	1.0434	0.325189	3.20859	0.0013339	0.00686449	TIMM10B	postnatal	rhesus	Forebrain/Cerebrum
425.984	-0.288919	0.219915	-1.31377	0.188923	0.332173	RPUSD4	prenatal	rhesus	Forebrain/Cerebrum
699.361	0.284252	0.198068	1.43513	0.151251	0.28336	MTERF3	postnatal	rhesus	Forebrain/Cerebrum
2424.34	-0.346128	0.153167	-2.25981	0.0238333	0.0699104	MTIF3	prenatal	rhesus	Forebrain/Cerebrum
1315.71	0.112709	0.251475	0.448192	0.654015	0.77106	MCTS1	postnatal	rhesus	Forebrain/Cerebrum
1007.84	-0.0769086	0.144716	-0.531445	0.595111	0.728051	TDRKH	prenatal	rhesus	Forebrain/Cerebrum
1737.32	0.410025	0.252656	1.62286	0.104619	0.216425	TBRG4	postnatal	rhesus	Forebrain/Cerebrum
1234.38	0.0878369	0.206938	0.424459	0.671231	0.783905	TFB1M	postnatal	rhesus	Forebrain/Cerebrum
1726.06	-0.757621	0.320762	-2.36194	0.0181797	0.0565457	CAMK4	prenatal	rhesus	Forebrain/Cerebrum
1274.39	-0.323577	0.307386	-1.05267	0.292491	0.452176	SECISBP2	prenatal	rhesus	Forebrain/Cerebrum
1754.62	0.112398	0.154033	0.7297	0.465574	0.620486	RNASEH1	postnatal	rhesus	Forebrain/Cerebrum
547.14	-0.277896	0.162171	-1.7136	0.086603	0.188469	MTERF1	prenatal	rhesus	Forebrain/Cerebrum
4430.05	0.201571	0.161945	1.24469	0.213246	0.361471	PTCD3	postnatal	rhesus	Forebrain/Cerebrum
1782.56	0.158517	0.239038	0.663147	0.507237	0.656625	PSMA6	postnatal	rhesus	Forebrain/Cerebrum
4039.53	0.984772	0.227045	4.33734	1.44216047653337e-05	0.000155524	MEF2D	postnatal	rhesus	Forebrain/Cerebrum
1798.73	0.462597	0.2007	2.30492	0.0211713	0.0635883	PTCD2	postnatal	rhesus	Forebrain/Cerebrum
1300.48	0.355483	0.362809	0.979809	0.32718	0.489898	EEFSEC	postnatal	rhesus	Forebrain/Cerebrum
4301.43	0.863456	0.401503	2.15056	0.0315109	0.0868984	NHP2	postnatal	rhesus	Forebrain/Cerebrum
1202.13	0.892575	0.187493	4.76058	1.93035673975104e-06	2.81452082130071e-05	MTO1	postnatal	rhesus	Forebrain/Cerebrum
2688.22	0.721355	0.327812	2.20051	0.0277704	0.0788389	TIMM50	postnatal	rhesus	Forebrain/Cerebrum
1203.18	-0.41785	0.219496	-1.90368	0.0569522	0.13673	TFAM	prenatal	rhesus	Forebrain/Cerebrum
10979.5	0.1582	0.245222	0.645131	0.518842	0.666426	LRPPRC	postnatal	rhesus	Forebrain/Cerebrum
1826.44	0.473649	0.190568	2.48546	0.0129383	0.0430223	GFM2	postnatal	rhesus	Forebrain/Cerebrum
271.088	0.865035	0.293565	2.94666	0.00321228	0.0141164	NOS3	postnatal	rhesus	Forebrain/Cerebrum
1752.81	0.58554	0.306135	1.91268	0.0557884	0.134633	DRG2	postnatal	rhesus	Forebrain/Cerebrum
910.048	0.0565644	0.230386	0.24552	0.806053	0.879755	MTERF2	postnatal	rhesus	Forebrain/Cerebrum
1909.13	0.705837	0.245123	2.87952	0.0039828	0.0168927	SSBP1	postnatal	rhesus	Forebrain/Cerebrum
1524.15	0.0268936	0.192429	0.139759	0.888851	0.934592	NOA1	postnatal	rhesus	Forebrain/Cerebrum
155.334	0.623431	0.328635	1.89703	0.057824	0.138358	NFATC1	postnatal	rhesus	Forebrain/Cerebrum
3636.46	-0.460661	0.248973	-1.85025	0.0642781	0.150128	YY1	prenatal	rhesus	Forebrain/Cerebrum
2341.28	0.822905	0.361453	2.27666	0.0228066	0.0674674	SLIRP	postnatal	rhesus	Forebrain/Cerebrum
7146.24	0.962975	0.322749	2.98366	0.00284819	0.0128283	PTCD1	postnatal	rhesus	Forebrain/Cerebrum
1431.5	-0.866887	0.264368	-3.27909	0.00104142	0.00562323	SIRT1	prenatal	rhesus	Forebrain/Cerebrum
3493.46	0.266224	0.146594	1.81607	0.0693603	0.159396	MTIF2	postnatal	rhesus	Forebrain/Cerebrum
3302.54	0.556031	0.42848	1.29768	0.194397	0.338919	JUND	postnatal	rhesus	Forebrain/Cerebrum
1.16469	-0.165302	1.17649	-0.140504	0.888262	0.934419	LSM3	prenatal	rhesus	Forebrain/Cerebrum
865.443	-0.0872726	0.129126	-0.675873	0.499122	0.649708	NRF1	prenatal	rhesus	Forebrain/Cerebrum
160.431	2.38193	0.521422	4.56814	4.9206466757013e-06	6.27389804180421e-05	CEBPB	postnatal	rhesus	Forebrain/Cerebrum
2884.22	0.882079	0.410885	2.14678	0.0318108	0.0875106	POLRMT	postnatal	rhesus	Forebrain/Cerebrum
760.858	0.990797	0.410058	2.41624	0.0156819	0.0502342	TIMM10	postnatal	rhesus	Forebrain/Cerebrum
298.777	-0.0359066	0.19152	-0.187482	0.851282	0.908844	TIMM8A	prenatal	rhesus	Forebrain/Cerebrum
768.151	0.760911	0.169316	4.49402	6.98917068932865e-06	8.45158730011731e-05	SPRYD4	postnatal	rhesus	Forebrain/Cerebrum
807.513	0.523035	0.209162	2.50062	0.0123975	0.0415475	TFB2M	postnatal	rhesus	Forebrain/Cerebrum
1398.16	0.578783	0.246831	2.34486	0.0190345	0.0585339	MRPL57	postnatal	rhesus	Forebrain/Cerebrum
1558.72	0.61454	0.265957	2.31068	0.0208507	0.0628201	MRPS17	postnatal	rhesus	Forebrain/Cerebrum
4736.18	0.532738	0.280357	1.90021	0.0574055	0.137602	JUN	postnatal	rhesus	Forebrain/Cerebrum
2105.62	0.812178	0.259882	3.12518	0.00177694	0.00872961	MRPS7	postnatal	rhesus	Forebrain/Cerebrum
2857.77	0.253339	0.108283	2.33961	0.0193039	0.0585234	GRSF1	postnatal	rhesus	Hindbrain/Cerebellum
2114.66	-0.0332974	0.228579	-0.145671	0.884181	0.927774	NELFE	prenatal	rhesus	Hindbrain/Cerebellum
465.943	-0.134774	0.383197	-0.351711	0.725055	0.817781	PPARGC1A	prenatal	rhesus	Hindbrain/Cerebellum
3280.63	0.706787	0.19664	3.59432	0.000325245	0.0026846	NFE2L2	postnatal	rhesus	Hindbrain/Cerebellum
2630.35	0.427947	0.179355	2.38603	0.0170315	0.053198	ERAL1	postnatal	rhesus	Hindbrain/Cerebellum
2908.77	0.267405	0.142435	1.87738	0.0604665	0.137367	MTPAP	postnatal	rhesus	Hindbrain/Cerebellum
25738.1	0.228263	0.229302	0.995471	0.319507	0.465196	DAZAP1	postnatal	rhesus	Hindbrain/Cerebellum
5632.69	0.215166	0.193299	1.11313	0.265653	0.408024	TUFM	postnatal	rhesus	Hindbrain/Cerebellum
4302.64	0.0539978	0.191684	0.281702	0.778172	0.85435	ATF2	postnatal	rhesus	Hindbrain/Cerebellum
2344.14	-0.349097	0.206945	-1.68691	0.0916206	0.186822	LSM4	prenatal	rhesus	Hindbrain/Cerebellum
243.431	0.102931	0.583978	0.176258	0.860091	0.91094	PPARGC1B	postnatal	rhesus	Hindbrain/Cerebellum
3425.91	0.273403	0.13969	1.95721	0.0503224	0.119992	GFM1	postnatal	rhesus	Hindbrain/Cerebellum
180.692	-0.827881	0.299412	-2.76502	0.00569193	0.0232105	RNASEL	prenatal	rhesus	Hindbrain/Cerebellum
11096.4	0.309155	0.217565	1.42098	0.155324	0.275858	CLK1	postnatal	rhesus	Hindbrain/Cerebellum
1239.28	0.572048	0.188804	3.02986	0.00244671	0.0122936	TIMM10B	postnatal	rhesus	Hindbrain/Cerebellum
437.348	0.123099	0.11954	1.02977	0.303116	0.448497	RPUSD4	postnatal	rhesus	Hindbrain/Cerebellum
752.743	0.0702931	0.159238	0.441434	0.658899	0.768843	MTERF3	postnatal	rhesus	Hindbrain/Cerebellum
2681.3	0.00356821	0.13003	0.0274414	0.978108	0.986453	MTIF3	postnatal	rhesus	Hindbrain/Cerebellum
1076.41	-0.0655256	0.0981268	-0.667764	0.504284	0.641776	MCTS1	prenatal	rhesus	Hindbrain/Cerebellum
1544.28	0.0783007	0.121459	0.644666	0.519144	0.65463	TDRKH	postnatal	rhesus	Hindbrain/Cerebellum
1673.9	0.191511	0.115694	1.65532	0.0978601	0.195976	TBRG4	postnatal	rhesus	Hindbrain/Cerebellum
1872.79	0.350383	0.138113	2.53694	0.0111827	0.0388311	TFB1M	postnatal	rhesus	Hindbrain/Cerebellum
2322.51	0.795908	0.449242	1.77167	0.0764496	0.163559	CAMK4	postnatal	rhesus	Hindbrain/Cerebellum
1545.98	-0.662501	0.256717	-2.58066	0.00986103	0.035292	SECISBP2	prenatal	rhesus	Hindbrain/Cerebellum
1572.7	-0.0134168	0.149276	-0.0898794	0.928383	0.956081	RNASEH1	prenatal	rhesus	Hindbrain/Cerebellum
543.118	0.326559	0.159272	2.05032	0.0403329	0.101605	MTERF1	postnatal	rhesus	Hindbrain/Cerebellum
4863.95	0.384748	0.137551	2.79713	0.00515585	0.021445	PTCD3	postnatal	rhesus	Hindbrain/Cerebellum
1822.41	0.259652	0.16929	1.53377	0.125087	0.235328	PSMA6	postnatal	rhesus	Hindbrain/Cerebellum
2862.3	0.437363	0.222513	1.96556	0.0493489	0.118378	MEF2D	postnatal	rhesus	Hindbrain/Cerebellum
1706.11	0.609056	0.238938	2.54902	0.0108027	0.0377952	PTCD2	postnatal	rhesus	Hindbrain/Cerebellum
925.737	0.643034	0.20229	3.17877	0.00147902	0.00841204	EEFSEC	postnatal	rhesus	Hindbrain/Cerebellum
2059.99	0.0859565	0.207967	0.413318	0.679374	0.7845	NHP2	postnatal	rhesus	Hindbrain/Cerebellum
1129.51	0.739753	0.204353	3.61998	0.000294631	0.00248393	MTO1	postnatal	rhesus	Hindbrain/Cerebellum
2555.35	-0.369526	0.233962	-1.57943	0.114237	0.219823	TIMM50	prenatal	rhesus	Hindbrain/Cerebellum
1414.18	-0.115182	0.22859	-0.50388	0.614345	0.733377	TFAM	prenatal	rhesus	Hindbrain/Cerebellum
9784.7	0.261399	0.16977	1.53973	0.123627	0.233178	LRPPRC	postnatal	rhesus	Hindbrain/Cerebellum
2084.73	0.462584	0.147626	3.13349	0.00172743	0.0094539	GFM2	postnatal	rhesus	Hindbrain/Cerebellum
209.128	0.572564	0.303072	1.8892	0.0588647	0.134736	NOS3	postnatal	rhesus	Hindbrain/Cerebellum
1871.79	0.243879	0.167217	1.45845	0.144716	0.261607	DRG2	postnatal	rhesus	Hindbrain/Cerebellum
2422.22	0.840382	0.26984	3.11437	0.00184336	0.00992932	MTERF2	postnatal	rhesus	Hindbrain/Cerebellum
1740.21	0.266041	0.191471	1.38946	0.164694	0.287718	SSBP1	postnatal	rhesus	Hindbrain/Cerebellum
1593.57	0.182298	0.198881	0.916619	0.359342	0.506244	NOA1	postnatal	rhesus	Hindbrain/Cerebellum
199.897	0.132872	0.219573	0.605138	0.545087	0.675989	NFATC1	postnatal	rhesus	Hindbrain/Cerebellum
3090.13	-0.236385	0.140944	-1.67715	0.0935127	0.189572	YY1	prenatal	rhesus	Hindbrain/Cerebellum
2061.01	0.492682	0.21153	2.32913	0.0198519	0.0596752	SLIRP	postnatal	rhesus	Hindbrain/Cerebellum
6706.62	0.62715	0.234655	2.67264	0.0075256	0.0285486	PTCD1	postnatal	rhesus	Hindbrain/Cerebellum
2730.22	0.124836	0.152173	0.820354	0.412014	0.558348	SIRT1	postnatal	rhesus	Hindbrain/Cerebellum
2617.84	0.0872956	0.146392	0.596316	0.550964	0.681422	MTIF2	postnatal	rhesus	Hindbrain/Cerebellum
2515.39	-0.316148	0.246017	-1.28507	0.198769	0.329297	JUND	prenatal	rhesus	Hindbrain/Cerebellum
1151.18	-0.0143656	0.10397	-0.138171	0.890105	0.931524	NRF1	prenatal	rhesus	Hindbrain/Cerebellum
74.622	0.69453	0.566112	1.22684	0.219882	0.354811	CEBPB	postnatal	rhesus	Hindbrain/Cerebellum
2040.44	0.376205	0.211897	1.77542	0.0758287	0.162576	POLRMT	postnatal	rhesus	Hindbrain/Cerebellum
396.02	0.689693	0.19743	3.49336	0.000476977	0.00359997	TIMM10	postnatal	rhesus	Hindbrain/Cerebellum
270.969	0.104301	0.15527	0.671736	0.501752	0.63966	TIMM8A	postnatal	rhesus	Hindbrain/Cerebellum
559.399	0.359553	0.163876	2.19406	0.028231	0.0776961	SPRYD4	postnatal	rhesus	Hindbrain/Cerebellum
815.939	0.721558	0.187579	3.84668	0.000119729	0.00125936	TFB2M	postnatal	rhesus	Hindbrain/Cerebellum
1197.71	-0.0658997	0.160178	-0.411415	0.680768	0.785499	MRPL57	prenatal	rhesus	Hindbrain/Cerebellum
1070.15	0.437026	0.18027	2.42429	0.0153384	0.0491657	MRPS17	postnatal	rhesus	Hindbrain/Cerebellum
4348.03	-0.140184	0.199115	-0.704035	0.481411	0.621556	JUN	prenatal	rhesus	Hindbrain/Cerebellum
1757.58	0.405803	0.181234	2.2391	0.0251492	0.0712331	MRPS7	postnatal	rhesus	Hindbrain/Cerebellum
3064.76	0.5318	0.142645	3.72814	0.0001929	0.000636148	GRSF1	postnatal	rhesus	Kidney
2835.11	0.0281712	0.0892849	0.315521	0.752366	0.821237	NELFE	postnatal	rhesus	Kidney
2324.65	0.356249	0.270326	1.31785	0.187554	0.279652	PPARGC1A	postnatal	rhesus	Kidney
6166.51	0.713814	0.126817	5.62867	1.81603166072915e-08	1.22150355327685e-07	NFE2L2	postnatal	rhesus	Kidney
1908.38	0.130247	0.121381	1.07304	0.283254	0.391721	ERAL1	postnatal	rhesus	Kidney
1187.67	0.152727	0.0974013	1.56802	0.116877	0.18939	MTPAP	postnatal	rhesus	Kidney
22438.9	-0.0542995	0.168797	-0.321685	0.747691	0.817914	DAZAP1	prenatal	rhesus	Kidney
10293.5	1.09076	0.120835	9.02686	1.76669984656337e-19	5.89930067960037e-18	TUFM	postnatal	rhesus	Kidney
2504.43	-0.268788	0.122552	-2.19326	0.028289	0.0559785	ATF2	prenatal	rhesus	Kidney
2292.17	0.115313	0.167398	0.688855	0.490915	0.598955	LSM4	postnatal	rhesus	Kidney
158.001	0.635464	0.463122	1.37213	0.170023	0.258461	PPARGC1B	postnatal	rhesus	Kidney
3860.18	0.906333	0.140795	6.43727	1.21645001039001e-10	1.16180715897019e-09	GFM1	postnatal	rhesus	Kidney
806.257	0.0490963	0.155377	0.315982	0.752016	0.821016	RNASEL	postnatal	rhesus	Kidney
9650.05	0.119277	0.241834	0.49322	0.621857	0.714503	CLK1	postnatal	rhesus	Kidney
1380.33	0.568593	0.176192	3.22712	0.00125043	0.00346475	TIMM10B	postnatal	rhesus	Kidney
413.758	0.0155958	0.191048	0.081633	0.934939	0.95531	RPUSD4	postnatal	rhesus	Kidney
777.027	0.230525	0.225987	1.02008	0.307691	0.417565	MTERF3	postnatal	rhesus	Kidney
2926.44	0.119102	0.131564	0.90528	0.365317	0.478084	MTIF3	postnatal	rhesus	Kidney
1093.49	0.531626	0.145016	3.66599	0.000246387	0.000793019	MCTS1	postnatal	rhesus	Kidney
182.413	0.0812174	0.211518	0.383974	0.700998	0.780168	TDRKH	postnatal	rhesus	Kidney
2581.19	0.608114	0.0949984	6.40131	1.54046909606008e-10	1.44664601093217e-09	TBRG4	postnatal	rhesus	Kidney
1441.98	0.349306	0.215004	1.62465	0.104238	0.17197	TFB1M	postnatal	rhesus	Kidney
23.0354	0.421998	0.426944	0.988415	0.322949	0.434311	CAMK4	postnatal	rhesus	Kidney
1469.6	-0.00699845	0.120876	-0.0578978	0.95383	0.969242	SECISBP2	prenatal	rhesus	Kidney
1382.34	0.141999	0.0677702	2.0953	0.036144	0.0692663	RNASEH1	postnatal	rhesus	Kidney
754.299	0.81196	0.157158	5.16651	2.38503512229141e-07	1.32905173399504e-06	MTERF1	postnatal	rhesus	Kidney
4337.38	0.716471	0.179391	3.99391	6.49923823671483e-05	0.000235979	PTCD3	postnatal	rhesus	Kidney
1548.86	0.569735	0.141697	4.02079	5.80024384159563e-05	0.000212929	PSMA6	postnatal	rhesus	Kidney
1876.63	-0.203899	0.202709	-1.00587	0.314478	0.425145	MEF2D	prenatal	rhesus	Kidney
1865.25	0.922203	0.198961	4.63509	3.56780393238337e-06	1.62984113988653e-05	PTCD2	postnatal	rhesus	Kidney
1060.74	0.699234	0.196564	3.55728	0.000374718	0.00116253	EEFSEC	postnatal	rhesus	Kidney
1825.06	0.256147	0.17736	1.44422	0.148678	0.232014	NHP2	postnatal	rhesus	Kidney
1286.92	0.957022	0.123962	7.72031	1.16043775008815e-14	2.05684492252683e-13	MTO1	postnatal	rhesus	Kidney
2102.23	0.364927	0.0933165	3.91064	9.20515431807318e-05	0.000324876	TIMM50	postnatal	rhesus	Kidney
1872.09	0.197648	0.138077	1.43143	0.152306	0.2367	TFAM	postnatal	rhesus	Kidney
12790.5	1.06412	0.14702	7.23793	4.55582497050037e-13	6.26346083101743e-12	LRPPRC	postnatal	rhesus	Kidney
2280	0.600358	0.135284	4.43776	9.09018198102731e-06	3.86677806177756e-05	GFM2	postnatal	rhesus	Kidney
468.166	-0.374615	0.236542	-1.58371	0.113259	0.184427	NOS3	prenatal	rhesus	Kidney
2151.64	0.0955449	0.0941471	1.01485	0.310179	0.420518	DRG2	postnatal	rhesus	Kidney
1732.59	0.617553	0.322055	1.91754	0.0551699	0.100065	MTERF2	postnatal	rhesus	Kidney
1980.26	0.241451	0.135445	1.78266	0.0746425	0.12968	SSBP1	postnatal	rhesus	Kidney
1491.08	0.248955	0.120394	2.06785	0.0386543	0.0734507	NOA1	postnatal	rhesus	Kidney
829.897	-0.180566	0.241632	-0.747278	0.454896	0.565924	NFATC1	prenatal	rhesus	Kidney
3314.81	-0.188091	0.0778877	-2.4149	0.0157397	0.0334932	YY1	prenatal	rhesus	Kidney
2238.3	0.900176	0.213591	4.21448	2.50358032942778e-05	9.85487797191363e-05	SLIRP	postnatal	rhesus	Kidney
7516.69	0.993749	0.124064	8.00996	1.14750135064002e-15	2.35237816985957e-14	PTCD1	postnatal	rhesus	Kidney
2223.3	-0.233206	0.159693	-1.46034	0.144198	0.226118	SIRT1	prenatal	rhesus	Kidney
3836.87	0.465261	0.127428	3.65116	0.000261058	0.000836496	MTIF2	postnatal	rhesus	Kidney
1985.84	-0.0701331	0.220309	-0.31834	0.750227	0.819774	JUND	prenatal	rhesus	Kidney
2.20841	1.40447	0.893215	1.57237	0.115865	0.187975	LSM3	postnatal	rhesus	Kidney
856.258	-0.51068	0.0911466	-5.60284	2.10872525586924e-08	1.40436284329594e-07	NRF1	prenatal	rhesus	Kidney
207.179	0.32931	0.48059	0.685221	0.493204	0.601034	CEBPB	postnatal	rhesus	Kidney
2652.91	0.302815	0.175458	1.72585	0.0843743	0.143559	POLRMT	postnatal	rhesus	Kidney
348.005	0.545496	0.183584	2.97137	0.00296471	0.00757813	TIMM10	postnatal	rhesus	Kidney
389.888	0.784919	0.190504	4.12022	3.78503116856848e-05	0.000143694	TIMM8A	postnatal	rhesus	Kidney
1417.15	1.12162	0.174781	6.41729	1.38718271217668e-10	1.31125846995456e-09	SPRYD4	postnatal	rhesus	Kidney
1622.39	1.44211	0.189801	7.598	3.00735722734381e-14	4.91452293568434e-13	TFB2M	postnatal	rhesus	Kidney
1402.64	0.617351	0.127134	4.85592	1.19830200251646e-06	5.91094728933969e-06	MRPL57	postnatal	rhesus	Kidney
1320.64	0.450123	0.158079	2.84745	0.00440708	0.0108201	MRPS17	postnatal	rhesus	Kidney
3140.05	-0.384503	0.227372	-1.69107	0.0908233	0.152987	JUN	prenatal	rhesus	Kidney
2035.49	0.598644	0.124636	4.80313	1.56205319300368e-06	7.54817415463316e-06	MRPS7	postnatal	rhesus	Kidney
1966.08	0.522576	0.327318	1.59654	0.110368	0.391799	GRSF1	postnatal	rhesus	Liver
1143.88	-0.193183	0.220524	-0.87602	0.381019	0.669361	NELFE	prenatal	rhesus	Liver
2150.83	-0.610808	0.875688	-0.697518	0.485479	0.741377	PPARGC1A	prenatal	rhesus	Liver
3842.78	0.523377	0.257446	2.03295	0.0420573	0.253097	NFE2L2	postnatal	rhesus	Liver
1241.61	-0.182197	0.351493	-0.518353	0.604212	0.815959	ERAL1	prenatal	rhesus	Liver
614.203	0.110745	0.304781	0.36336	0.716336	0.876304	MTPAP	postnatal	rhesus	Liver
7527.84	0.113384	0.268459	0.422351	0.672769	0.853302	DAZAP1	postnatal	rhesus	Liver
6547.19	-0.100039	0.286696	-0.348937	0.727136	0.880682	TUFM	prenatal	rhesus	Liver
1381.3	0.0436747	0.207269	0.210715	0.83311	0.935597	ATF2	postnatal	rhesus	Liver
988.378	-0.422017	0.414901	-1.01715	0.309081	0.613118	LSM4	prenatal	rhesus	Liver
143.331	-0.357801	0.426953	-0.838033	0.402012	0.683955	PPARGC1B	prenatal	rhesus	Liver
2434.27	0.347731	0.306158	1.13579	0.256046	0.568489	GFM1	postnatal	rhesus	Liver
279.802	-0.334506	0.404369	-0.827229	0.408108	0.6884	RNASEL	prenatal	rhesus	Liver
4734.48	0.213678	0.376283	0.567864	0.570127	0.797125	CLK1	postnatal	rhesus	Liver
974.994	0.481335	0.345841	1.39178	0.163989	0.46767	TIMM10B	postnatal	rhesus	Liver
412.257	0.252357	0.277407	0.9097	0.362981	0.657591	RPUSD4	postnatal	rhesus	Liver
347.279	0.0566441	0.275664	0.205483	0.837195	0.937752	MTERF3	postnatal	rhesus	Liver
1628.58	0.0210654	0.269543	0.0781523	0.937707	0.975496	MTIF3	postnatal	rhesus	Liver
779.628	0.381884	0.265092	1.44057	0.149707	0.448997	MCTS1	postnatal	rhesus	Liver
32.2171	-1.69172	0.797091	-2.12237	0.0338068	0.231416	TDRKH	prenatal	rhesus	Liver
1948.08	-0.276597	0.311443	-0.888116	0.374478	0.665227	TBRG4	prenatal	rhesus	Liver
724.073	0.108121	0.269897	0.400601	0.688714	0.861516	TFB1M	postnatal	rhesus	Liver
15.4061	0.0338441	0.991706	0.0341272	0.972776	0.991335	CAMK4	postnatal	rhesus	Liver
936.802	0.193119	0.171175	1.1282	0.259236	0.57072	SECISBP2	postnatal	rhesus	Liver
744.723	0.198429	0.215539	0.920616	0.357251	0.654163	RNASEH1	postnatal	rhesus	Liver
541.036	0.684711	0.278486	2.45869	0.0139445	0.152146	MTERF1	postnatal	rhesus	Liver
2523.55	-0.0805836	0.202935	-0.397092	0.6913	0.86256	PTCD3	prenatal	rhesus	Liver
971.509	0.44668	0.263537	1.69495	0.0900856	0.358508	PSMA6	postnatal	rhesus	Liver
1139.13	0.0195804	0.388505	0.0503994	0.959804	0.985205	MEF2D	postnatal	rhesus	Liver
1195.75	0.00919129	0.207534	0.0442882	0.964675	0.987144	PTCD2	postnatal	rhesus	Liver
709.185	0.112311	0.377396	0.297595	0.766012	0.901565	EEFSEC	postnatal	rhesus	Liver
1073.96	-0.177287	0.371834	-0.476791	0.633511	0.835004	NHP2	prenatal	rhesus	Liver
901.81	0.0280046	0.181225	0.154529	0.877193	0.954346	MTO1	postnatal	rhesus	Liver
2106.96	-0.172109	0.296464	-0.58054	0.561551	0.792527	TIMM50	prenatal	rhesus	Liver
1224.79	0.242748	0.24935	0.973521	0.330294	0.6319	TFAM	postnatal	rhesus	Liver
7332.19	0.130804	0.284773	0.45933	0.645997	0.840194	LRPPRC	postnatal	rhesus	Liver
725.139	-0.162197	0.235909	-0.68754	0.491742	0.745693	GFM2	prenatal	rhesus	Liver
233.281	-1.16931	0.422883	-2.7651	0.00569047	0.10005	NOS3	prenatal	rhesus	Liver
1686.12	-0.0417504	0.288611	-0.14466	0.88498	0.957163	DRG2	prenatal	rhesus	Liver
910.368	-0.0370952	0.36438	-0.101804	0.918912	0.96843	MTERF2	prenatal	rhesus	Liver
1016.23	0.34788	0.189209	1.8386	0.0659742	0.310051	SSBP1	postnatal	rhesus	Liver
642.547	0.10758	0.219926	0.489163	0.624726	0.828585	NOA1	postnatal	rhesus	Liver
190.287	0.124871	0.398538	0.313322	0.754036	0.896285	NFATC1	postnatal	rhesus	Liver
2165.49	0.199785	0.24319	0.821516	0.411352	0.690608	YY1	postnatal	rhesus	Liver
1206.08	0.321431	0.214611	1.49774	0.134202	0.429006	SLIRP	postnatal	rhesus	Liver
3754.43	0.0867722	0.335055	0.258979	0.795651	0.91629	PTCD1	postnatal	rhesus	Liver
1535.96	0.462545	0.33749	1.37054	0.170517	0.475847	SIRT1	postnatal	rhesus	Liver
2624.2	0.452174	0.176482	2.56216	0.0104024	0.133397	MTIF2	postnatal	rhesus	Liver
1607.34	-0.982411	0.551543	-1.78121	0.0748787	0.328195	JUND	prenatal	rhesus	Liver
278.801	-0.293928	0.287933	-1.02082	0.307339	0.611864	NRF1	prenatal	rhesus	Liver
883.679	-0.723408	1.00389	-0.720607	0.471151	0.732387	CEBPB	prenatal	rhesus	Liver
1892.17	-0.688859	0.300567	-2.29186	0.0219135	0.188056	POLRMT	prenatal	rhesus	Liver
154.9	0.545555	0.339079	1.60893	0.107631	0.388292	TIMM10	postnatal	rhesus	Liver
307.956	0.437479	0.297184	1.47208	0.140999	0.437332	TIMM8A	postnatal	rhesus	Liver
1996.59	0.137381	0.388016	0.35406	0.723294	0.878827	SPRYD4	postnatal	rhesus	Liver
1330.79	0.529205	0.410642	1.28873	0.197493	0.507693	TFB2M	postnatal	rhesus	Liver
850.09	-0.219194	0.325612	-0.673173	0.500837	0.751572	MRPL57	prenatal	rhesus	Liver
971.91	0.709163	0.296799	2.38937	0.0168773	0.167871	MRPS17	postnatal	rhesus	Liver
2428.77	-0.68656	0.5384	-1.27519	0.202243	0.510858	JUN	prenatal	rhesus	Liver
1232.93	0.00678501	0.263597	0.0257401	0.979465	0.993038	MRPS7	postnatal	rhesus	Liver
1081.58	0.579832	0.0889959	6.51527	7.25612062545666e-11	4.49005705090431e-09	MCTS1	postnatal	mouse	Heart
2579.74	0.319386	0.13365	2.38971	0.0168615	0.0374739	TBRG4	postnatal	mouse	Heart
791.915	-0.996867	0.314806	-3.16661	0.00154225	0.00480124	NHP2	prenatal	mouse	Heart
8790.91	0.518563	0.130548	3.97219	7.12147485305475e-05	0.000355269	MEF2D	postnatal	mouse	Heart
1860.76	-0.165486	0.146304	-1.13112	0.258006	0.362116	TIMM50	prenatal	mouse	Heart
2397.7	0.315655	0.132837	2.37627	0.0174889	0.038643	TFAM	postnatal	mouse	Heart
3249.27	0.471678	0.169498	2.78278	0.00538947	0.014063	NFE2L2	postnatal	mouse	Heart
629.727	0.630031	0.158139	3.98403	6.77571843294102e-05	0.000340696	MTIF3	postnatal	mouse	Heart
1450.67	-0.135312	0.117351	-1.15306	0.248886	0.351717	SIRT1	prenatal	mouse	Heart
1321.18	0.0180467	0.1608	0.112231	0.910641	0.938063	TIMM13	postnatal	mouse	Heart
1170.97	0.320822	0.131675	2.43647	0.0148315	0.0335137	POLRMT	postnatal	mouse	Heart
2239.09	0.740863	0.118564	6.24865	4.14004011287716e-10	1.76933426951946e-08	MTIF2	postnatal	mouse	Heart
1754.51	-0.37368	0.0904875	-4.12963	3.63340948155232e-05	0.000202524	DRG2	prenatal	mouse	Heart
440.171	-0.224763	0.105136	-2.13783	0.0325305	0.0654709	RNASEH1	prenatal	mouse	Heart
952.504	0.434658	0.136255	3.19002	0.00142262	0.00447834	ERAL1	postnatal	mouse	Heart
4648.83	0.292341	0.126857	2.30449	0.021195	0.0456539	PSMA6	postnatal	mouse	Heart
1101.84	0.368224	0.155729	2.36451	0.0180537	0.0396943	SLIRP	postnatal	mouse	Heart
1623.71	0.116258	0.134567	0.863941	0.38762	0.499622	TIMM9	postnatal	mouse	Heart
4138.13	-0.17526	0.0989096	-1.77192	0.0764082	0.133798	YY1	prenatal	mouse	Heart
1215.05	0.491356	0.111083	4.42334	9.71878057291639e-06	6.80688993133623e-05	MTERF3	postnatal	mouse	Heart
2009.53	0.821146	0.209846	3.91309	9.11216927648451e-05	0.000437792	PTCD2	postnatal	mouse	Heart
2712.72	0.807434	0.185366	4.35588	1.32531146774551e-05	8.75564909853784e-05	GFM2	postnatal	mouse	Heart
608.301	0.246772	0.177915	1.38702	0.165435	0.253176	MRPL57	postnatal	mouse	Heart
8822.82	0.943809	0.214262	4.40493	1.05817668018894e-05	7.29459911528319e-05	LRPPRC	postnatal	mouse	Heart
1652.11	0.270532	0.0802698	3.37028	0.000750918	0.00259165	MTPAP	postnatal	mouse	Heart
1022.74	-0.894738	0.214227	-4.17659	2.95915290197544e-05	0.000170357	NELFE	prenatal	mouse	Heart
7281.92	0.135947	0.141352	0.961761	0.33617	0.447004	CLK1	postnatal	mouse	Heart
528.765	1.09072	0.196319	5.55588	2.76212826231479e-08	5.547254703874e-07	TFB2M	postnatal	mouse	Heart
1058.14	0.686783	0.186648	3.67955	0.000233642	0.000958585	TIMM10	postnatal	mouse	Heart
2726.96	-0.202367	0.0912094	-2.21871	0.0265063	0.0552081	ATF2	prenatal	mouse	Heart
8040.47	1.03036	0.198412	5.19301	2.06918858359623e-07	2.87039200346524e-06	GFM1	postnatal	mouse	Heart
2229.6	0.170936	0.151424	1.12885	0.25896	0.363282	NOS3	postnatal	mouse	Heart
6978.46	0.807961	0.284951	2.83544	0.00457627	0.0122051	PPARGC1A	postnatal	mouse	Heart
1069.75	0.645745	0.187613	3.4419	0.000577636	0.00207447	PTCD1	postnatal	mouse	Heart
1418.89	0.171176	0.110127	1.55435	0.1201	0.194861	SSBP1	postnatal	mouse	Heart
475.8	-0.678462	0.221246	-3.06656	0.0021654	0.00642957	LSM4	prenatal	mouse	Heart
611.309	-0.0354407	0.161677	-0.219207	0.826489	0.876	RPUSD4	prenatal	mouse	Heart
1055.92	0.488821	0.161502	3.02671	0.0024723	0.00720772	MTO1	postnatal	mouse	Heart
1660.18	-0.350979	0.201676	-1.74031	0.0818048	0.141549	NFATC1	prenatal	mouse	Heart
486.057	-0.784093	0.210127	-3.73152	0.000190325	0.000808138	EEFSEC	prenatal	mouse	Heart
1166.43	0.921933	0.346064	2.66405	0.00772055	0.0191499	PPARGC1B	postnatal	mouse	Heart
803.939	-0.143577	0.154748	-0.927816	0.353503	0.464796	LSM3	prenatal	mouse	Heart
2151.77	0.1933	0.0698399	2.76776	0.00564433	0.0146278	MRPS17	postnatal	mouse	Heart
1397.26	0.265493	0.106299	2.49762	0.0125031	0.0289215	SECISBP2	postnatal	mouse	Heart
830.481	0.398471	0.131082	3.03986	0.00236692	0.0069459	NOA1	postnatal	mouse	Heart
428.437	0.190967	0.187876	1.01645	0.309414	0.418178	TFB1M	postnatal	mouse	Heart
155.951	0.0165934	0.38254	0.0433768	0.965401	0.97735	CAMK4	postnatal	mouse	Heart
801.696	0.658167	0.142815	4.60851	4.05555293395418e-06	3.25548838169308e-05	MTG1	postnatal	mouse	Heart
86.7227	-0.0594528	0.16083	-0.369662	0.711634	0.789191	MTERF1	prenatal	mouse	Heart
357.465	-0.35796	0.16275	-2.19945	0.0278457	0.0575519	TDRKH	prenatal	mouse	Heart
8014.14	1.07275	0.19728	5.43771	5.39690246084418e-08	9.68655887391304e-07	GRSF1	postnatal	mouse	Heart
1976.9	0.29091	0.162639	1.78868	0.0736659	0.129939	MRPS7	postnatal	mouse	Heart
126.277	-0.0268318	0.219083	-0.122473	0.902525	0.932506	TIMM8A	prenatal	mouse	Heart
573.923	1.43234	0.322459	4.44192	8.91589997054996e-06	6.33085141195133e-05	MTERF2	postnatal	mouse	Heart
1180.88	0.609877	0.159045	3.83461	0.000125766	0.000572803	SPRYD4	postnatal	mouse	Heart
2505.49	0.459215	0.16851	2.72515	0.0064272	0.0163643	JUN	postnatal	mouse	Heart
253.52	1.73095	0.436304	3.96731	7.26892410730392e-05	0.000361428	CEBPB	postnatal	mouse	Heart
1309.25	-0.760259	0.149331	-5.09109	3.56010518965958e-07	4.44317668812952e-06	NRF1	prenatal	mouse	Heart
4906.97	0.599761	0.187356	3.20118	0.00136864	0.00432917	PTCD3	postnatal	mouse	Heart
1810.39	-0.041534	0.600995	-0.0691088	0.944903	0.962327	RNASEL	prenatal	mouse	Heart
3329.41	-0.561888	0.193607	-2.90221	0.00370544	0.0102002	DAZAP1	prenatal	mouse	Heart
4644.62	0.687132	0.197184	3.48472	0.000492651	0.0018094	TUFM	postnatal	mouse	Heart
1.96634	-0.627856	0.78638	-0.798414	0.424631	0.534807	TIMM10B	prenatal	mouse	Heart
1373.82	0.119802	0.172153	0.695905	0.486489	0.606504	MCTS1	postnatal	mouse	Forebrain/Cerebrum
1537.69	-0.590394	0.311554	-1.895	0.0580926	0.117743	TBRG4	prenatal	mouse	Forebrain/Cerebrum
1115.57	-0.559893	0.399986	-1.39978	0.161579	0.264835	NHP2	prenatal	mouse	Forebrain/Cerebrum
5132.67	1.33738	0.343942	3.8884	0.000100906	0.000614187	MEF2D	postnatal	mouse	Forebrain/Cerebrum
1660	-1.01896	0.307317	-3.31567	0.000914243	0.00384393	TIMM50	prenatal	mouse	Forebrain/Cerebrum
1854.26	-0.738359	0.338205	-2.18317	0.0290234	0.0671228	TFAM	prenatal	mouse	Forebrain/Cerebrum
752.812	-0.428331	0.33802	-1.26718	0.205092	0.317671	NFE2L2	prenatal	mouse	Forebrain/Cerebrum
574.006	0.18331	0.110912	1.65276	0.0983801	0.179054	MTIF3	postnatal	mouse	Forebrain/Cerebrum
1408.97	-1.0554	0.287246	-3.67419	0.000238604	0.00126158	SIRT1	prenatal	mouse	Forebrain/Cerebrum
1256.46	-0.0368338	0.271271	-0.135782	0.891993	0.928982	TIMM13	prenatal	mouse	Forebrain/Cerebrum
1220.21	-0.168388	0.151549	-1.11111	0.266519	0.388066	POLRMT	prenatal	mouse	Forebrain/Cerebrum
1452.59	-0.404494	0.158338	-2.55463	0.0106301	0.0295884	MTIF2	prenatal	mouse	Forebrain/Cerebrum
2105.03	-0.106009	0.196729	-0.538859	0.589984	0.69747	DRG2	prenatal	mouse	Forebrain/Cerebrum
566.187	-0.430625	0.129566	-3.3236	0.000888634	0.00375747	RNASEH1	prenatal	mouse	Forebrain/Cerebrum
756.884	-0.329451	0.139687	-2.3585	0.0183491	0.0463447	ERAL1	prenatal	mouse	Forebrain/Cerebrum
3724.84	-0.547572	0.26026	-2.10394	0.0353835	0.0788267	PSMA6	prenatal	mouse	Forebrain/Cerebrum
871.383	-0.394237	0.240266	-1.64084	0.100831	0.182577	SLIRP	prenatal	mouse	Forebrain/Cerebrum
1305.4	0.607072	0.152511	3.98051	6.87665086363802e-05	0.000445415	TIMM9	postnatal	mouse	Forebrain/Cerebrum
4275.66	-0.526278	0.201382	-2.61334	0.00896633	0.0257364	YY1	prenatal	mouse	Forebrain/Cerebrum
1022.5	-0.681695	0.176998	-3.85143	0.000117429	0.000697248	MTERF3	prenatal	mouse	Forebrain/Cerebrum
1013.79	0.16256	0.167129	0.972662	0.330721	0.456617	PTCD2	postnatal	mouse	Forebrain/Cerebrum
1654.34	-0.29483	0.160902	-1.83236	0.0668979	0.131861	GFM2	prenatal	mouse	Forebrain/Cerebrum
655.53	0.0368107	0.138526	0.265731	0.790446	0.855641	MRPL57	postnatal	mouse	Forebrain/Cerebrum
3055.74	0.0313917	0.234775	0.13371	0.893632	0.930012	LRPPRC	postnatal	mouse	Forebrain/Cerebrum
1146.84	-0.381877	0.185747	-2.0559	0.039792	0.0867222	MTPAP	prenatal	mouse	Forebrain/Cerebrum
1054.61	-0.940357	0.351132	-2.67807	0.00740475	0.0219103	NELFE	prenatal	mouse	Forebrain/Cerebrum
6375.13	-0.220136	0.160555	-1.37109	0.170345	0.275875	CLK1	prenatal	mouse	Forebrain/Cerebrum
382.797	0.0015659	0.125459	0.0124814	0.990042	0.994015	TFB2M	postnatal	mouse	Forebrain/Cerebrum
467.208	0.372181	0.224077	1.66095	0.0967235	0.176751	TIMM10	postnatal	mouse	Forebrain/Cerebrum
4541.81	-0.0166899	0.157739	-0.105807	0.915735	0.944872	ATF2	prenatal	mouse	Forebrain/Cerebrum
1742.37	0.271394	0.227363	1.19366	0.232611	0.349349	GFM1	postnatal	mouse	Forebrain/Cerebrum
435.994	-0.176144	0.211609	-0.832404	0.405181	0.530049	NOS3	prenatal	mouse	Forebrain/Cerebrum
1217.73	2.01214	0.476889	4.2193	2.45062728714288e-05	0.00018985	PPARGC1A	postnatal	mouse	Forebrain/Cerebrum
982.496	0.0558321	0.0955803	0.584138	0.559127	0.67098	PTCD1	postnatal	mouse	Forebrain/Cerebrum
1560.67	-1.02112	0.274683	-3.71744	0.000201254	0.00109195	SSBP1	prenatal	mouse	Forebrain/Cerebrum
442.659	-1.11632	0.399005	-2.79777	0.00514567	0.0162523	LSM4	prenatal	mouse	Forebrain/Cerebrum
393.244	-1.02577	0.328226	-3.12521	0.00177676	0.0067007	RPUSD4	prenatal	mouse	Forebrain/Cerebrum
684.58	0.163776	0.127793	1.28157	0.199993	0.311547	MTO1	postnatal	mouse	Forebrain/Cerebrum
196.376	0.199097	0.136217	1.46162	0.143847	0.242116	NFATC1	postnatal	mouse	Forebrain/Cerebrum
677.2	-0.294191	0.223951	-1.31364	0.188968	0.298442	EEFSEC	prenatal	mouse	Forebrain/Cerebrum
169.37	2.37864	0.398829	5.96407	2.46035183194127e-09	1.0596817114141e-07	PPARGC1B	postnatal	mouse	Forebrain/Cerebrum
825.423	-1.18556	0.364404	-3.25342	0.00114024	0.00461613	LSM3	prenatal	mouse	Forebrain/Cerebrum
2162.74	-0.156915	0.0800572	-1.96004	0.0499911	0.104228	MRPS17	prenatal	mouse	Forebrain/Cerebrum
1013.82	-0.375422	0.150359	-2.49683	0.0125308	0.033924	SECISBP2	prenatal	mouse	Forebrain/Cerebrum
844.913	-0.268424	0.166287	-1.61423	0.106478	0.190881	NOA1	prenatal	mouse	Forebrain/Cerebrum
286.751	-0.71507	0.43053	-1.6609	0.0967328	0.176755	TFB1M	prenatal	mouse	Forebrain/Cerebrum
6701.39	2.94433	0.763228	3.85774	0.00011444	0.000682413	CAMK4	postnatal	mouse	Forebrain/Cerebrum
618.333	0.245821	0.104796	2.34571	0.0189908	0.0476964	MTG1	postnatal	mouse	Forebrain/Cerebrum
105.545	-0.38693	0.197461	-1.95953	0.0500513	0.104327	MTERF1	prenatal	mouse	Forebrain/Cerebrum
2291.04	-0.263309	0.175863	-1.49724	0.134331	0.229126	TDRKH	prenatal	mouse	Forebrain/Cerebrum
3706.39	-0.10655	0.321378	-0.33154	0.740236	0.818142	GRSF1	prenatal	mouse	Forebrain/Cerebrum
1221.37	-0.131173	0.294804	-0.444951	0.656355	0.752842	MRPS7	prenatal	mouse	Forebrain/Cerebrum
70.1092	-0.515174	0.540855	-0.952518	0.340834	0.466486	TIMM8A	prenatal	mouse	Forebrain/Cerebrum
483.527	-0.0337581	0.286589	-0.117793	0.906232	0.938419	MTERF2	prenatal	mouse	Forebrain/Cerebrum
355.187	-0.285999	0.317805	-0.899922	0.368162	0.494048	SPRYD4	prenatal	mouse	Forebrain/Cerebrum
1976.72	0.0195047	0.198222	0.0983981	0.921616	0.948734	JUN	postnatal	mouse	Forebrain/Cerebrum
53.1784	1.6408	0.38283	4.28598	1.81937427556174e-05	0.000149012	CEBPB	postnatal	mouse	Forebrain/Cerebrum
1723.3	-1.41508	0.283034	-4.99967	5.74270599110399e-07	8.75937746143087e-06	NRF1	prenatal	mouse	Forebrain/Cerebrum
2592.77	-0.498797	0.257571	-1.93654	0.0528012	0.10897	PTCD3	prenatal	mouse	Forebrain/Cerebrum
2219.04	-1.43163	0.5525	-2.59119	0.00956442	0.0271202	RNASEL	prenatal	mouse	Forebrain/Cerebrum
4775.27	-1.23753	0.27001	-4.58325	4.57799877054174e-06	4.74393700269684e-05	DAZAP1	prenatal	mouse	Forebrain/Cerebrum
1687.14	-0.576041	0.272285	-2.11558	0.0343805	0.0769669	TUFM	prenatal	mouse	Forebrain/Cerebrum
2.67149	0.189592	0.754006	0.251446	0.801469	0.863895	TIMM10B	postnatal	mouse	Forebrain/Cerebrum
1637.17	-0.026387	0.147405	-0.17901	0.85793	0.907555	MCTS1	prenatal	mouse	Hindbrain/Cerebellum
1410.22	0.16937	0.138919	1.2192	0.222769	0.342737	TBRG4	postnatal	mouse	Hindbrain/Cerebellum
719.912	-0.522548	0.167519	-3.11933	0.00181264	0.00664181	NHP2	prenatal	mouse	Hindbrain/Cerebellum
4991.01	0.921814	0.218351	4.22172	2.42448677089662e-05	0.000166473	MEF2D	postnatal	mouse	Hindbrain/Cerebellum
1410.55	-0.303988	0.138978	-2.18732	0.0287195	0.0665675	TIMM50	prenatal	mouse	Hindbrain/Cerebellum
1561.15	0.0317052	0.132126	0.239962	0.810359	0.873329	TFAM	postnatal	mouse	Hindbrain/Cerebellum
645.994	0.845109	0.246688	3.42582	0.000612954	0.00265498	NFE2L2	postnatal	mouse	Hindbrain/Cerebellum
671.151	0.0747863	0.133351	0.560825	0.574917	0.690922	MTIF3	postnatal	mouse	Hindbrain/Cerebellum
1307.62	0.00647852	0.181367	0.0357204	0.971505	0.982069	SIRT1	postnatal	mouse	Hindbrain/Cerebellum
1206.78	0.252346	0.12308	2.05026	0.0403396	0.0878388	TIMM13	postnatal	mouse	Hindbrain/Cerebellum
1463.03	0.310802	0.164497	1.8894	0.0588378	0.119459	POLRMT	postnatal	mouse	Hindbrain/Cerebellum
1355.61	-0.00373518	0.185993	-0.0200823	0.983978	0.990011	MTIF2	prenatal	mouse	Hindbrain/Cerebellum
2097.41	0.20986	0.105395	1.99118	0.0464612	0.0985961	DRG2	postnatal	mouse	Hindbrain/Cerebellum
534.31	-0.206888	0.140741	-1.46999	0.141565	0.240042	RNASEH1	prenatal	mouse	Hindbrain/Cerebellum
798.151	0.121833	0.113905	1.0696	0.2848	0.412695	ERAL1	postnatal	mouse	Hindbrain/Cerebellum
3152.89	-0.13971	0.130314	-1.0721	0.283674	0.411565	PSMA6	prenatal	mouse	Hindbrain/Cerebellum
876.509	0.214539	0.169471	1.26594	0.205536	0.322151	SLIRP	postnatal	mouse	Hindbrain/Cerebellum
1427.48	0.3873	0.174552	2.21883	0.0264982	0.0624611	TIMM9	postnatal	mouse	Hindbrain/Cerebellum
3699.53	-0.198906	0.118225	-1.68244	0.0924829	0.172145	YY1	prenatal	mouse	Hindbrain/Cerebellum
912.435	0.0904968	0.169561	0.533714	0.59354	0.707037	MTERF3	postnatal	mouse	Hindbrain/Cerebellum
1036.77	0.27378	0.0821143	3.33414	0.000855641	0.00351028	PTCD2	postnatal	mouse	Hindbrain/Cerebellum
1706.81	0.0476426	0.123997	0.384224	0.700813	0.79236	GFM2	postnatal	mouse	Hindbrain/Cerebellum
660.715	0.0788098	0.118808	0.663337	0.507115	0.631337	MRPL57	postnatal	mouse	Hindbrain/Cerebellum
3159.36	0.114518	0.130346	0.878568	0.379636	0.510894	LRPPRC	postnatal	mouse	Hindbrain/Cerebellum
1186.91	-0.0499241	0.122702	-0.406872	0.684102	0.779595	MTPAP	prenatal	mouse	Hindbrain/Cerebellum
743.072	-0.540495	0.145763	-3.70804	0.000208867	0.00105451	NELFE	prenatal	mouse	Hindbrain/Cerebellum
7525.13	0.215529	0.14755	1.46072	0.144092	0.243433	CLK1	postnatal	mouse	Hindbrain/Cerebellum
356.547	0.365351	0.200458	1.82258	0.0683674	0.135098	TFB2M	postnatal	mouse	Hindbrain/Cerebellum
488.017	0.195678	0.176668	1.1076	0.268034	0.394872	TIMM10	postnatal	mouse	Hindbrain/Cerebellum
4608.41	-0.326144	0.131577	-2.47874	0.0131848	0.0352175	ATF2	prenatal	mouse	Hindbrain/Cerebellum
1913.49	0.689406	0.123354	5.58883	2.28604211088277e-08	4.74902426960022e-07	GFM1	postnatal	mouse	Hindbrain/Cerebellum
488.724	-0.0868563	0.195349	-0.444621	0.656594	0.758678	NOS3	prenatal	mouse	Hindbrain/Cerebellum
2239.01	0.816698	0.284934	2.86627	0.0041534	0.0134233	PPARGC1A	postnatal	mouse	Hindbrain/Cerebellum
1103.45	-0.0559333	0.128203	-0.436289	0.662627	0.763053	PTCD1	prenatal	mouse	Hindbrain/Cerebellum
1286.61	-0.18959	0.208316	-0.910109	0.362765	0.494377	SSBP1	prenatal	mouse	Hindbrain/Cerebellum
334.213	-0.331074	0.18868	-1.75469	0.0793131	0.152077	LSM4	prenatal	mouse	Hindbrain/Cerebellum
319.372	-0.0316914	0.111926	-0.283146	0.777065	0.849352	RPUSD4	prenatal	mouse	Hindbrain/Cerebellum
762.652	0.27509	0.0931611	2.95284	0.00314865	0.0106351	MTO1	postnatal	mouse	Hindbrain/Cerebellum
243.279	0.470381	0.240504	1.95582	0.0504867	0.105644	NFATC1	postnatal	mouse	Hindbrain/Cerebellum
589.793	-0.29341	0.143671	-2.04223	0.041129	0.0892716	EEFSEC	prenatal	mouse	Hindbrain/Cerebellum
416.524	2.30272	0.473157	4.86672	1.13465880781062e-06	1.24299025581441e-05	PPARGC1B	postnatal	mouse	Hindbrain/Cerebellum
557.587	-0.457032	0.266981	-1.71186	0.0869231	0.163833	LSM3	prenatal	mouse	Hindbrain/Cerebellum
1898.5	-0.190019	0.133749	-1.42072	0.155399	0.25841	MRPS17	prenatal	mouse	Hindbrain/Cerebellum
1012.79	0.0688837	0.148402	0.46417	0.642526	0.747539	SECISBP2	postnatal	mouse	Hindbrain/Cerebellum
848.37	0.0736045	0.0930473	0.791044	0.428918	0.559034	NOA1	postnatal	mouse	Hindbrain/Cerebellum
245.965	-0.0858246	0.147582	-0.581537	0.560879	0.679519	TFB1M	prenatal	mouse	Hindbrain/Cerebellum
13223.2	2.77398	0.484514	5.72528	1.03261014866263e-08	2.46702531688232e-07	CAMK4	postnatal	mouse	Hindbrain/Cerebellum
623.664	0.281725	0.115563	2.43784	0.0147752	0.0386384	MTG1	postnatal	mouse	Hindbrain/Cerebellum
111.521	0.412485	0.253785	1.62533	0.104092	0.189006	MTERF1	postnatal	mouse	Hindbrain/Cerebellum
2720.79	-0.147282	0.1112	-1.32448	0.185344	0.296874	TDRKH	prenatal	mouse	Hindbrain/Cerebellum
3525.01	0.445963	0.152975	2.91527	0.0035538	0.0117647	GRSF1	postnatal	mouse	Hindbrain/Cerebellum
1225.34	0.286954	0.122013	2.35184	0.018681	0.046872	MRPS7	postnatal	mouse	Hindbrain/Cerebellum
47.3551	0.603707	0.204645	2.95002	0.00317751	0.0107193	TIMM8A	postnatal	mouse	Hindbrain/Cerebellum
521.42	0.0865602	0.262657	0.329556	0.741735	0.823174	MTERF2	postnatal	mouse	Hindbrain/Cerebellum
343.519	0.166745	0.0916286	1.81979	0.0687905	0.135721	SPRYD4	postnatal	mouse	Hindbrain/Cerebellum
1990.53	0.610938	0.215016	2.84136	0.0044921	0.0143502	JUN	postnatal	mouse	Hindbrain/Cerebellum
56.8895	0.553271	0.386417	1.4318	0.152201	0.254356	CEBPB	postnatal	mouse	Hindbrain/Cerebellum
1364.87	-0.660912	0.201633	-3.27779	0.00104623	0.00416498	NRF1	prenatal	mouse	Hindbrain/Cerebellum
2187.24	0.209874	0.138301	1.51752	0.129135	0.223855	PTCD3	postnatal	mouse	Hindbrain/Cerebellum
2662.45	-2.54931	0.506123	-5.03693	4.73060735075264e-07	5.89842327043615e-06	RNASEL	prenatal	mouse	Hindbrain/Cerebellum
4206.59	-0.875804	0.238451	-3.67288	0.000239827	0.00118873	DAZAP1	prenatal	mouse	Hindbrain/Cerebellum
0.674966	-1.17649	2.41554	-0.487048	0.626224	0.734379	JUND	prenatal	mouse	Hindbrain/Cerebellum
1680.96	-0.0892026	0.133709	-0.667137	0.504684	0.629282	TUFM	prenatal	mouse	Hindbrain/Cerebellum
2.87574	-0.223581	0.736068	-0.303751	0.761318	0.837607	TIMM10B	prenatal	mouse	Hindbrain/Cerebellum
1372.08	0.434472	0.102978	4.21909	2.45295543713863e-05	0.000123855	MCTS1	postnatal	mouse	Kidney
2088.87	-0.202165	0.147565	-1.37001	0.170685	0.251332	TBRG4	prenatal	mouse	Kidney
1192.24	-0.693272	0.282889	-2.45069	0.0142585	0.0296334	NHP2	prenatal	mouse	Kidney
3172.79	-0.0189201	0.08506	-0.222433	0.823977	0.870892	MEF2D	prenatal	mouse	Kidney
1994.58	-0.198936	0.198686	-1.00126	0.316703	0.416643	TIMM50	prenatal	mouse	Kidney
2670.91	0.00066593	0.121097	0.00549914	0.995612	0.996757	TFAM	postnatal	mouse	Kidney
4056.83	0.681774	0.19362	3.5212	0.000429605	0.00142231	NFE2L2	postnatal	mouse	Kidney
802.899	1.09781	0.278823	3.93729	8.24081077713676e-05	0.000345392	MTIF3	postnatal	mouse	Kidney
2065.99	-0.205965	0.0974189	-2.11422	0.0344965	0.0642928	SIRT1	prenatal	mouse	Kidney
1462.3	0.230166	0.198516	1.15943	0.246281	0.339745	TIMM13	postnatal	mouse	Kidney
1455.32	0.148959	0.16065	0.927227	0.353809	0.455372	POLRMT	postnatal	mouse	Kidney
1817.83	0.288785	0.115882	2.49206	0.0127005	0.0268133	MTIF2	postnatal	mouse	Kidney
2451.99	-0.359713	0.120469	-2.98595	0.002827	0.00728582	DRG2	prenatal	mouse	Kidney
627.981	-0.219811	0.0937434	-2.34482	0.0190364	0.0382616	RNASEH1	prenatal	mouse	Kidney
1028.23	-0.0415878	0.136483	-0.30471	0.760587	0.82173	ERAL1	prenatal	mouse	Kidney
4151.63	-0.171219	0.129714	-1.31997	0.186845	0.270766	PSMA6	prenatal	mouse	Kidney
1039.02	0.115591	0.186964	0.618253	0.536408	0.630778	SLIRP	postnatal	mouse	Kidney
1403.77	0.334738	0.104001	3.21859	0.00128822	0.00370756	TIMM9	postnatal	mouse	Kidney
5395.03	-0.223652	0.0600018	-3.72743	0.000193446	0.000718323	YY1	prenatal	mouse	Kidney
1362.03	0.327218	0.117337	2.7887	0.00529199	0.0125631	MTERF3	postnatal	mouse	Kidney
1244.65	0.402972	0.173433	2.3235	0.0201523	0.0402364	PTCD2	postnatal	mouse	Kidney
2434.87	0.632509	0.205864	3.07246	0.00212302	0.00569408	GFM2	postnatal	mouse	Kidney
609.024	0.119715	0.207034	0.578239	0.563103	0.655475	MRPL57	postnatal	mouse	Kidney
4906.61	0.372941	0.175416	2.12604	0.0335003	0.0626435	LRPPRC	postnatal	mouse	Kidney
1489.39	-0.0747351	0.086362	-0.86537	0.386836	0.488176	MTPAP	prenatal	mouse	Kidney
1393.2	-0.648669	0.140823	-4.60628	4.0993549543582e-06	2.71650588308803e-05	NELFE	prenatal	mouse	Kidney
9440.74	0.122697	0.0757894	1.61892	0.105465	0.167312	CLK1	postnatal	mouse	Kidney
495.515	0.540313	0.212844	2.53854	0.0111316	0.0238937	TFB2M	postnatal	mouse	Kidney
517.461	0.252381	0.18997	1.32853	0.184002	0.267287	TIMM10	postnatal	mouse	Kidney
3994.88	-0.0979006	0.0760591	-1.28717	0.198036	0.28427	ATF2	prenatal	mouse	Kidney
3367.75	1.01867	0.23826	4.27547	1.9073300974871e-05	9.93324347257149e-05	GFM1	postnatal	mouse	Kidney
839.328	-0.264536	0.201039	-1.31584	0.188227	0.272518	NOS3	prenatal	mouse	Kidney
3249.82	1.85733	0.46301	4.01144	6.03497472542818e-05	0.000265386	PPARGC1A	postnatal	mouse	Kidney
932.076	0.267496	0.122459	2.18436	0.0289357	0.055191	PTCD1	postnatal	mouse	Kidney
1882.67	-0.232565	0.13756	-1.69064	0.0909052	0.147533	SSBP1	prenatal	mouse	Kidney
485.026	-0.764135	0.281696	-2.71262	0.00667537	0.0153553	LSM4	prenatal	mouse	Kidney
697.624	-0.193295	0.0968777	-1.99524	0.0460164	0.0824062	RPUSD4	prenatal	mouse	Kidney
910.007	0.608022	0.213348	2.84991	0.00437316	0.0106384	MTO1	postnatal	mouse	Kidney
541.413	0.234028	0.115327	2.02926	0.042432	0.0768066	NFATC1	postnatal	mouse	Kidney
924.073	0.0825883	0.2011	0.410683	0.681305	0.757314	EEFSEC	postnatal	mouse	Kidney
429.188	0.807716	0.251981	3.20546	0.00134846	0.00385599	PPARGC1B	postnatal	mouse	Kidney
904.199	-1.01251	0.248149	-4.08024	4.49894374412099e-05	0.000207099	LSM3	prenatal	mouse	Kidney
2146.93	-0.062691	0.0808546	-0.775355	0.43813	0.538089	MRPS17	prenatal	mouse	Kidney
1489.88	0.425704	0.110757	3.84359	0.00012125	0.000479907	SECISBP2	postnatal	mouse	Kidney
939.467	0.0658399	0.175941	0.374216	0.708244	0.779431	NOA1	postnatal	mouse	Kidney
433.772	0.147603	0.223676	0.659898	0.509319	0.60592	TFB1M	postnatal	mouse	Kidney
171.258	-1.02589	0.515597	-1.98972	0.0466223	0.0832795	CAMK4	prenatal	mouse	Kidney
653.197	0.588377	0.151102	3.89392	9.8638215722083e-05	0.000402541	MTG1	postnatal	mouse	Kidney
126.895	0.217358	0.110502	1.967	0.0491827	0.0871649	MTERF1	postnatal	mouse	Kidney
436.848	-0.352187	0.165187	-2.13204	0.0330033	0.0618189	TDRKH	prenatal	mouse	Kidney
5562.88	0.773646	0.187783	4.11989	3.79047599635178e-05	0.000179382	GRSF1	postnatal	mouse	Kidney
1981.73	0.345582	0.226494	1.52579	0.127063	0.196036	MRPS7	postnatal	mouse	Kidney
130.353	0.18922	0.155028	1.22056	0.222254	0.312709	TIMM8A	postnatal	mouse	Kidney
337.621	0.250093	0.214422	1.16636	0.243468	0.33669	MTERF2	postnatal	mouse	Kidney
679.895	0.0648851	0.129009	0.50295	0.614999	0.700917	SPRYD4	postnatal	mouse	Kidney
1716.11	-0.251205	0.155914	-1.61118	0.107142	0.169538	JUN	prenatal	mouse	Kidney
175.019	1.36328	0.17782	7.6666	1.76609992068511e-14	3.79367243132249e-12	CEBPB	postnatal	mouse	Kidney
1947.73	-0.976442	0.158361	-6.16592	7.00752429301372e-10	2.36826291006692e-08	NRF1	prenatal	mouse	Kidney
3208	-0.283498	0.0889041	-3.18881	0.00142862	0.00405137	PTCD3	prenatal	mouse	Kidney
1041.96	0.0794431	0.363515	0.218541	0.827007	0.873059	RNASEL	postnatal	mouse	Kidney
4414.55	-0.809045	0.196764	-4.11176	3.92649306227938e-05	0.000184819	DAZAP1	prenatal	mouse	Kidney
0.399053	1.15066	1.92174	0.598757	0.549335	0.643008	JUND	postnatal	mouse	Kidney
3029.84	0.326124	0.221747	1.4707	0.141371	0.214315	TUFM	postnatal	mouse	Kidney
4.31807	0.441616	0.481325	0.9175	0.358881	0.460235	TIMM10B	postnatal	mouse	Kidney
951.827	0.662596	0.163185	4.06041	4.89869227556513e-05	0.000403577	MCTS1	postnatal	mouse	Liver
1842.41	-0.379561	0.205247	-1.84929	0.0644157	0.12998	TBRG4	prenatal	mouse	Liver
1349.64	-0.977353	0.382972	-2.55202	0.01071	0.031197	NHP2	prenatal	mouse	Liver
1719.35	-0.164244	0.182853	-0.898231	0.369063	0.491432	MEF2D	prenatal	mouse	Liver
1529.88	-0.399363	0.249476	-1.60081	0.10942	0.196049	TIMM50	prenatal	mouse	Liver
2209.35	0.0532987	0.125274	0.425457	0.670504	0.7602	TFAM	postnatal	mouse	Liver
3347.58	0.340687	0.254367	1.33935	0.180455	0.287476	NFE2L2	postnatal	mouse	Liver
703.184	1.49838	0.279523	5.3605	8.29921770976985e-08	2.50542421427014e-06	MTIF3	postnatal	mouse	Liver
1403.77	-1.23781	0.249447	-4.96223	6.96875809467449e-07	1.35268787972884e-05	SIRT1	prenatal	mouse	Liver
1428.03	0.437868	0.239246	1.8302	0.0672206	0.134321	TIMM13	postnatal	mouse	Liver
789.039	0.45093	0.264761	1.70316	0.0885383	0.166913	POLRMT	postnatal	mouse	Liver
1548.64	0.259186	0.208554	1.24277	0.213951	0.326933	MTIF2	postnatal	mouse	Liver
1510.97	0.11542	0.217592	0.53044	0.595807	0.698564	DRG2	postnatal	mouse	Liver
409.566	-0.181904	0.168217	-1.08136	0.279537	0.400616	RNASEH1	prenatal	mouse	Liver
639.009	0.344558	0.146974	2.34435	0.0190604	0.0493948	ERAL1	postnatal	mouse	Liver
3308.38	-0.0990251	0.148086	-0.6687	0.503687	0.618461	PSMA6	prenatal	mouse	Liver
881.941	0.243557	0.158919	1.53259	0.125377	0.217861	SLIRP	postnatal	mouse	Liver
1042.09	0.136221	0.1778	0.766142	0.443592	0.56377	TIMM9	postnatal	mouse	Liver
3553.34	-0.212564	0.094031	-2.26057	0.0237857	0.059095	YY1	prenatal	mouse	Liver
814.838	0.23144	0.10907	2.12194	0.0338428	0.0782331	MTERF3	postnatal	mouse	Liver
981.389	0.283874	0.212877	1.33351	0.182365	0.289899	PTCD2	postnatal	mouse	Liver
1786.32	0.460655	0.21472	2.14538	0.0319227	0.0746183	GFM2	postnatal	mouse	Liver
693.211	0.121157	0.19293	0.627983	0.530015	0.641228	MRPL57	postnatal	mouse	Liver
6099.24	-0.00309119	0.316925	-0.00975369	0.992218	0.994749	LRPPRC	prenatal	mouse	Liver
868.771	-0.221911	0.130195	-1.70445	0.0882974	0.166585	MTPAP	prenatal	mouse	Liver
1060.04	-0.398614	0.259271	-1.53744	0.124186	0.216312	NELFE	prenatal	mouse	Liver
5798.26	-0.0184305	0.248968	-0.0740274	0.940989	0.961068	CLK1	prenatal	mouse	Liver
348.752	1.12277	0.167391	6.70747	1.98025036242064e-11	3.16840057987302e-09	TFB2M	postnatal	mouse	Liver
499.209	0.220661	0.197296	1.11843	0.263385	0.381989	TIMM10	postnatal	mouse	Liver
1917.18	-0.427396	0.178254	-2.39768	0.0164994	0.0441193	ATF2	prenatal	mouse	Liver
2693.73	0.916464	0.258975	3.53881	0.000401936	0.00223575	GFM1	postnatal	mouse	Liver
305.287	0.471593	0.375083	1.2573	0.208644	0.321035	NOS3	postnatal	mouse	Liver
537.133	0.519859	0.504973	1.02948	0.303255	0.425274	PPARGC1A	postnatal	mouse	Liver
658.309	0.176198	0.205389	0.857874	0.390962	0.513429	PTCD1	postnatal	mouse	Liver
1421.62	0.241106	0.169068	1.42609	0.153842	0.255056	SSBP1	postnatal	mouse	Liver
399.801	-1.20481	0.378026	-3.18711	0.00143704	0.00622265	LSM4	prenatal	mouse	Liver
484.73	-0.200629	0.195451	-1.02649	0.304661	0.426606	RPUSD4	prenatal	mouse	Liver
766.978	-0.0330127	0.261903	-0.126049	0.899693	0.93362	MTO1	prenatal	mouse	Liver
362.18	0.65974	0.208771	3.16011	0.00157712	0.00670733	NFATC1	postnatal	mouse	Liver
764.685	0.748613	0.290994	2.57261	0.0100935	0.0297455	EEFSEC	postnatal	mouse	Liver
150.61	0.742127	0.333438	2.22568	0.0260353	0.0635215	PPARGC1B	postnatal	mouse	Liver
644.791	-1.72947	0.329546	-5.24803	1.53733767356773e-07	4.16905131814979e-06	LSM3	prenatal	mouse	Liver
1844.09	-0.0119791	0.144728	-0.0827694	0.934035	0.956627	MRPS17	prenatal	mouse	Liver
905.318	0.16446	0.206671	0.795759	0.426172	0.547032	SECISBP2	postnatal	mouse	Liver
647.107	-0.657387	0.257811	-2.54988	0.0107761	0.031316	NOA1	prenatal	mouse	Liver
468.01	0.612577	0.251181	2.43879	0.0147366	0.0402272	TFB1M	postnatal	mouse	Liver
30.7515	-1.37653	0.662482	-2.07784	0.0377245	0.0852446	CAMK4	prenatal	mouse	Liver
587.176	0.775809	0.217332	3.56969	0.000357399	0.00203916	MTG1	postnatal	mouse	Liver
99.8887	-0.353733	0.223322	-1.58396	0.113203	0.201442	MTERF1	prenatal	mouse	Liver
472.012	-0.411816	0.395812	-1.04043	0.298139	0.420257	TDRKH	prenatal	mouse	Liver
3151.89	0.343319	0.154539	2.22157	0.0263123	0.0640927	GRSF1	postnatal	mouse	Liver
1781.41	0.520705	0.176549	2.94935	0.00318443	0.011849	MRPS7	postnatal	mouse	Liver
167.753	0.294379	0.246854	1.19252	0.233057	0.348637	TIMM8A	postnatal	mouse	Liver
184.187	0.134829	0.349464	0.385816	0.699633	0.784491	MTERF2	postnatal	mouse	Liver
1514.38	1.11709	0.434441	2.57134	0.0101307	0.0298352	SPRYD4	postnatal	mouse	Liver
552.706	0.0472659	0.62255	0.075923	0.93948	0.960309	JUN	postnatal	mouse	Liver
728.429	2.20294	0.644106	3.42016	0.000625845	0.00317242	CEBPB	postnatal	mouse	Liver
1483.16	-1.48585	0.280638	-5.29455	1.19310892738035e-07	3.38728009801265e-06	NRF1	prenatal	mouse	Liver
2722.69	-0.406229	0.171235	-2.37234	0.0176757	0.0465753	PTCD3	prenatal	mouse	Liver
1842.79	-1.84174	0.759433	-2.42515	0.0153021	0.0414875	RNASEL	prenatal	mouse	Liver
3489.94	-0.490766	0.212573	-2.30869	0.0209606	0.0533663	DAZAP1	prenatal	mouse	Liver
2282.57	0.224765	0.192462	1.16784	0.242871	0.359578	TUFM	postnatal	mouse	Liver
2.61603	2.40726	0.661184	3.64082	0.000271766	0.00163468	TIMM10B	postnatal	mouse	Liver
1928.2	-0.0613328	0.104529	-0.586756	0.557368	0.671219	NELFE	prenatal	rat	Heart
2660.36	-0.220329	0.162097	-1.35924	0.174072	0.292073	TFAM	prenatal	rat	Heart
21.6523	-0.53718	0.433605	-1.23887	0.215394	0.340743	MRPS17	prenatal	rat	Heart
1000.9	0.025407	0.0794361	0.319842	0.749088	0.824147	PTCD1	postnatal	rat	Heart
2867.96	0.431385	0.126369	3.41368	0.000640915	0.00629745	NFE2L2	postnatal	rat	Heart
2850.26	-0.32729	0.108221	-3.02429	0.0024922	0.0162916	ATF2	prenatal	rat	Heart
706.494	-0.126049	0.106278	-1.18604	0.235607	0.362901	NOA1	prenatal	rat	Heart
1070.01	0.0791487	0.154095	0.513636	0.607507	0.713353	MCTS1	postnatal	rat	Heart
1122.57	0.349371	0.0911103	3.8346	0.000125771	0.00197754	TFB2M	postnatal	rat	Heart
1342.22	0.286065	0.14008	2.04215	0.0411362	0.108728	SPRYD4	postnatal	rat	Heart
10344.6	0.52823	0.136845	3.86006	0.00011336	0.00182756	GRSF1	postnatal	rat	Heart
3032.14	0.0201026	0.0949047	0.211819	0.832248	0.884993	MRPS7	postnatal	rat	Heart
1134.93	0.242115	0.128759	1.88037	0.060058	0.14008	MTIF2	postnatal	rat	Heart
2037.81	-0.172907	0.0931437	-1.85634	0.0634044	0.145263	YY1	prenatal	rat	Heart
2369.43	0.448107	0.321086	1.3956	0.162836	0.27892	PPARGC1A	postnatal	rat	Heart
1271.92	-0.304321	0.155822	-1.953	0.0508195	0.124661	MTERF3	prenatal	rat	Heart
11871.9	0.208064	0.134373	1.5484	0.121526	0.227988	LRPPRC	postnatal	rat	Heart
269.578	0.434478	0.291887	1.48851	0.136616	0.247175	MTERF2	postnatal	rat	Heart
6143.26	-0.0245833	0.114502	-0.214697	0.830003	0.883435	PSMA6	prenatal	rat	Heart
1581.15	0.613724	0.180583	3.39856	0.000677413	0.00655694	TIMM10	postnatal	rat	Heart
491.751	-0.0948172	0.10754	-0.881694	0.377943	0.509347	MTERF1	prenatal	rat	Heart
[truncated: 990 more rows]

## Sheet: Anolis
Anolis gene differential expression results (comparing embryo to postnatal samples)
[truncated: 1,753 more rows]

[truncated: 2 more sheets: Drosophila, Xenopus]
